# Supplementary material
Source: publisher figshare collection journal article supplement (https://acs.figshare.com/ndownloader/files/17999822)
Supplement: Supplementary file 1 [file 17999822]

## Sheet: 3A, WT DMSO vs HC104A
Supplementary Dataset 3A: Gene expression tables of WT Mtb treated with HC104A compared to DMSO
	DMSO_1	DMSO_2	HC104A_1	HC104A_2	FC	logFC	logCPM	LR	PValue	FDR	Rv number	Gene name	Annotated function
MT0001	383.343	774.403	413.919	468.103	0.761868	-0.392387	9.20386	0.741364	0.389224	0.668534	Rv0001	dnaA	chromosomal replication initiator protein
MT0002	172.182	286.018	185.585	236.686	0.921646	-0.117716	7.75533	0.0932759	0.760053	0.898559	Rv0002	dnaN	DNA polymerase III, [beta] subunit
MT0003	92.5973	144.499	109.09	120.466	0.968353	-0.0463953	6.80303	0.0184168	0.892052	0.950079	Rv0003	recF	DNA replication and SOS induction
MT0004	26.141	28.6919	29.4803	37.862	1.22803	0.296341	5.03614	0.999507	0.31743	0.602543	Rv0004	Rv0004	conserved hypothetical protein
MT0005	986.271	1669.12	1918.01	1779.86	1.39261	0.477786	10.4347	1.20439	0.272446	0.557147	Rv0005	gyrB	DNA gyrase subunit B
MT0006	589.276	833.034	1225.89	1183.87	1.69428	0.760671	9.67769	3.55252	0.0594552	0.254262	Rv0006	gyrA	DNA gyrase subunit A
MT0007	178.282	205.625	309.479	353.834	1.72782	0.788953	7.85002	5.36935	0.0204936	0.132136
MT0009	4.00829	4.92059	3.66904	6.24528	1.10972	0.150194	2.38577	0.119529	0.729546	0.88102
MT0010	50.4812	40.6815	42.7912	56.549	1.08918	0.123236	5.67292	0.159142	0.689948	0.865417	Rv0008c	Rv0008c	hypothetical protein
MT0011	1473.13	2040.52	1539.16	1525.7	0.872279	-0.197139	10.7148	0.200577	0.654256	0.848661	Rv0009	ppiA	peptidyl-prolyl cis-trans isomerase
MT0012	8.5394	9.49465	13.8656	16.6378	1.69145	0.75826	3.61638	6.50702	0.0107449	0.0901527
MT0013	70.4645	98.8969	100.131	86.2629	1.10089	0.138677	6.39629	0.207844	0.648462	0.844249	Rv0010c	Rv0010c	hypothetical protein
MT0014	199.369	341.184	317.073	339.392	1.21453	0.280395	8.0736	0.599414	0.438802	0.709943	Rv0011c	Rv0011c	hypothetical protein
MT0015	141.8	135.628	105.549	126.077	0.83485	-0.260411	7.13261	0.709125	0.399735	0.677498	Rv0012	Rv0012	possible cell division protein
MT0016	104.041	128.005	120.822	140.812	1.12758	0.173224	7.00739	0.291622	0.589183	0.809239	Rv0013	pabA	p-aminobenzoate synthase glutamine amidotransferase
MT0017	485.584	453.11	431.965	421.459	0.909158	-0.137398	8.79809	0.161886	0.687426	0.864004	Rv0014c	pknB	serine-threonine protein kinase
MT0018	427.376	353.936	295.998	232.1	0.675917	-0.565083	8.40342	2.25337	0.133324	0.396336	Rv0015c	pknA	serine-threonine protein kinase
MT0019	618.438	549.373	593.872	443.464	0.888279	-0.170915	9.04202	0.227363	0.633486	0.838694	Rv0016c	pbpA	penicillin-binding protein
MT0020	194.78	196.061	199.28	176.039	0.960308	-0.0584308	7.60431	0.0321575	0.857682	0.933761	Rv0017c	rodA	FtsW/RodA/SpovE family
MT0021	341.808	310.136	294.76	272.109	0.869502	-0.201739	8.33013	0.376717	0.539366	0.781718	Rv0018c	ppp	putative phosphoprotein phosphatase
MT0022	171.02	196.685	153.118	150.765	0.826477	-0.274953	7.47587	0.75855	0.383783	0.662611	Rv0019c	Rv0019c	conserved hypothetical protein
MT0023	2962.3	2688.03	1858.54	1728.09	0.634765	-0.655705	11.1477	2.34006	0.126085	0.38637	Rv0020c	Rv0020c	conserved hypothetical protein
MT0024	24.6887	29.177	36.3918	46.6932	1.54259	0.625352	4.98357	4.10434	0.0427733	0.207118	Rv0021c	Rv0021c	conserved hypothetical protein
MT0026	73.311	46.6416	52.0065	55.2317	0.893667	-0.162192	5.92693	0.219687	0.639278	0.840001	Rv0023	Rv0023	putative transcriptional regulator
MT0027	90.4479	56.5521	63.2696	75.48	0.943618	-0.0837258	6.24454	0.0436681	0.834472	0.92616	Rv0024	Rv0024	putative p60 homologue
MT0028	25.5601	19.821	23.2941	28.6405	1.14341	0.19334	4.66628	0.350737	0.553696	0.791144	Rv0025	Rv0025	conserved hypothetical protein
MT0029	67.2114	77.8977	81.7854	86.2629	1.15821	0.211894	6.09196	0.551398	0.457747	0.72341	Rv0026	Rv0026	conserved hypothetical protein
MT0030	64.7716	73.1158	83.6626	90.9957	1.26676	0.341143	6.22667	1.41607	0.234051	0.518805	Rv0027	Rv0027	conserved hypothetical protein
MT0030.1	27.0124	40.8894	46.0763	43.6682	1.32268	0.403465	5.23463	1.76856	0.183561	0.463256
MT0031	39.9086	25.0188	21.6303	15.9547	0.578818	-0.788819	4.59254	4.7109	0.0299719	0.164732
MT0033	2.09128	2.07912	5.58889	6.1477	2.80699	1.48903	1.84067	19.4489	1.0333e-05	0.000654423
MT0034	40.4895	41.721	54.353	55.622	1.33772	0.419777	5.49147	2.17699	0.140088	0.405625	Rv0030	Rv0030	hypothetical protein
MT0035	11.3859	12.4054	18.3879	15.4668	1.424	0.509954	3.74098	3.03666	0.0814033	0.305262	Rv0031	Rv0031	conserved hypothetical protein
MT0036	19.2282	11.0886	13.7802	7.2211	0.692776	-0.52954	3.69439	1.82094	0.177201	0.458036
MT0037	114.265	132.301	73.7648	64.4532	0.560673	-0.834769	6.39668	7.49456	0.00618858	0.0646399	Rv0032	bioF2	C-terminal similar to B. subtilis BioF
MT0038	16.2074	19.1972	10.7938	11.7587	0.637277	-0.650008	3.68383	3.27189	0.0704764	0.279524	Rv0033	Rv0033	possible acyl carrier protein
MT0039	4.06638	4.78198	3.62638	3.12264	0.765795	-0.384971	1.96773	1.49745	0.221065	0.503948	Rv0034	Rv0034	hypothetical protein
MT0040	55.5932	56.5521	40.0608	38.0572	0.696661	-0.521472	5.45924	3.21376	0.0730217	0.285257	Rv0035	fadD34	acyl-CoA synthase
MT0041	108.805	101.184	97.3575	110.512	0.989833	-0.0147429	6.8937	0.0021378	0.963122	0.985853	Rv0036c	Rv0036c	conserved hypothetical protein
MT0042	119.668	126.272	127.35	120.075	1.00608	0.00874849	6.9928	0.000809128	0.977307	0.988705	Rv0037c	Rv0037c	probable membrane protein
MT0043	290.223	200.497	202.096	155.693	0.729096	-0.455819	7.73766	1.40816	0.235362	0.520274	Rv0038	Rv0038	conserved hypothetical protein
MT0044	12.4896	11.9896	6.39949	11.8563	0.744948	-0.424788	3.96442	0.999637	0.317398	0.602543
MT0046	244.157	335.154	143.263	195.506	0.584791	-0.774008	7.99046	3.35067	0.0671775	0.271294	Rv0040c	Rv0040c	conserved hypothetical protein
MT0047	428.48	485.613	570.962	563.392	1.24098	0.311474	8.85913	0.80516	0.369555	0.651292	Rv0041	leuS	leucyl-tRNA synthase
MT0048	87.7176	115.183	138.272	120.27	1.27447	0.349898	6.66614	1.30995	0.252403	0.538154	Rv0042c	Rv0042c	conserved hypothetical protein
MT0049	82.0247	80.5313	86.3078	89.3368	1.08048	0.111669	6.28773	0.150283	0.698265	0.869084	Rv0043c	Rv0043c	transcriptional regulator (GntR family)
MT0050	59.8339	67.71	69.2425	76.7486	1.14471	0.194987	6.12695	0.463416	0.496032	0.747894	Rv0044c	Rv0044c	possible monooxygenase
MT0051	80.0496	154.34	85.6678	157.254	1.03647	0.0516757	7.42241	0.0108709	0.91696	0.963062	Rv0045c	Rv0045c	possible dihydrolipoamide acetyltransferase
MT0052	609.086	1275.89	683.124	1177.67	0.987183	-0.0186102	10.3879	0.00110709	0.973457	0.988705	Rv0046c	Rv0046c	conserved hypothetical protein
MT0053	410.356	600.519	353.081	423.898	0.768635	-0.37963	9.24224	0.763252	0.382313	0.661217	Rv0047c	Rv0047c	conserved hypothetical protein
MT0054	62.9127	57.5917	57.1261	64.746	1.01117	0.0160262	5.9732	0.00300312	0.956297	0.980881	Rv0048c	Rv0048c	hypothetical protein
MT0055	214.879	225.931	184.945	193.116	0.857659	-0.221524	7.86589	0.468125	0.493851	0.746299	Rv0049	Rv0049	hypothetical protein
MT0056	527.584	516.869	483.033	448.587	0.891972	-0.164929	9.12955	0.224794	0.635411	0.83871	Rv0050	ponA	penicillin-bonding protein
MT0057	67.6181	73.1158	83.1933	90.4102	1.23359	0.302862	6.46835	1.10913	0.29227	0.578991	Rv0051	Rv0051	probable membrane protein
MT0058	31.7178	37.147	41.9806	44.2049	1.25181	0.324014	5.27336	1.24093	0.265292	0.550271
MT0059	199.311	356.361	339.813	370.472	1.27833	0.354255	8.08401	0.769493	0.380374	0.659614	Rv0053	rpsF	30S ribosomal protein S6
MT0060	174.39	296.275	239.938	336.66	1.22513	0.292936	7.89716	0.496124	0.481208	0.739892	Rv0054	ssb	single strand binding protein
MT0061	95.1533	200.566	161.224	231.173	1.32705	0.408222	7.28493	0.768845	0.380575	0.65964	Rv0055	rpsR	30S ribosomal protein S18
MT0062	120.771	244.643	178.972	339.245	1.41824	0.504105	7.74315	1.18792	0.275749	0.559063	Rv0056	rplI	50S ribosomal protein L9
MT0063	64.365	123.569	75.258	132.029	1.10312	0.141586	6.58753	0.120037	0.728994	0.880619
MT0064	479.368	503.979	467.845	558.465	1.04369	0.0616872	9.01077	0.0300933	0.862279	0.936443	Rv0058	dnaB	DNA helicase (contains intein)
MT0065	45.892	38.0479	48.6788	42.6923	1.0883	0.122083	5.42667	0.174856	0.675832	0.858233
MT0066	470.132	420.606	349.753	334.757	0.768472	-0.379936	8.67737	1.21385	0.27057	0.554767	Rv0060	Rv0060	hypothetical protein
MT0066.1	139.767	322.61	272.192	359.689	1.36672	0.450722	7.85479	1.24445	0.264615	0.549903
MT0066.2	9.46885	6.65319	11.4338	10.3437	1.34781	0.430618	3.18171	1.75488	0.185264	0.465493
MT0067	122.514	156.696	176.626	280.989	1.63898	0.712794	7.43012	3.6121	0.0573605	0.249584	Rv0062	celA	cellulase/endoglucanase
MT0068	226.439	156.835	106.317	125.198	0.603973	-0.727444	7.45407	4.76219	0.0290915	0.16189	Rv0063	Rv0063	probable oxidoreductase
MT0069	76.6222	43.7308	67.0666	39.1794	0.882724	-0.179966	5.84015	0.127806	0.720718	0.879381
MT0070	1360.2	1150.31	1342.74	810.374	0.857643	-0.221551	10.0062	0.221602	0.637822	0.838797	Rv0064	Rv0064	possible membrane protein
MT0071	127.626	84.4123	125.686	111.049	1.11631	0.158743	6.87179	0.177774	0.673293	0.858013	Rv0065	Rv0065	conserved hypothetical protein
MT0072	462.58	548.056	553.3	452.197	0.994942	-0.00731615	8.86465	0.000443559	0.983197	0.991164	Rv0066c	icd2	isocitrate dehydrogenase
MT0073	40.78	50.4533	37.0744	33.3244	0.771996	-0.373334	5.50492	1.62186	0.202832	0.484294	Rv0067c	Rv0067c	transcriptional regulator (TetR/AcrR family)
MT0074	15.5103	26.4048	31.1442	40.9358	1.72069	0.782987	5.31666	3.66703	0.0554991	0.244687	Rv0068	Rv0068	probable oxidoreductase
MT0075	58.1492	65.8388	51.2812	64.0141	0.929891	-0.104866	5.60586	0.122063	0.726808	0.880578
MT0076	46.9376	55.5125	47.6122	54.5486	0.997291	-0.00391386	5.39435	0.000168522	0.989642	0.993627	Rv0070c	glyA2	serine hydroxymethyltransferase
MT0077	40.8962	16.633	12.5003	13.0761	0.444202	-1.17071	4.36564	8.20226	0.00418383	0.0492384	Rv0071	Rv0071	group II intron maturase
MT0078	60.0662	97.4415	79.1403	86.019	1.0489	0.0688716	6.27946	0.0455197	0.831051	0.925194	Rv0072	Rv0072	ABC-transporter transmembrane subunit
MT0079	77.2031	100.768	77.0498	89.288	0.934751	-0.0973462	6.4166	0.0980414	0.754193	0.894539	Rv0073	Rv0073	ABC-transporter ATP-binding subunit
MT0080	49.9003	49.0673	44.6258	54.4022	1.00043	0.000626902	5.68526	4.69123e-06	0.998272	0.998772	Rv0074	Rv0074	conserved hypothetical protein
MT0081	67.1533	52.9483	70.4797	56.2075	1.05469	0.0768256	5.89638	0.0646312	0.79932	0.914622	Rv0075	Rv0075	probable aminotransferase
MT0082	59.0787	63.4825	69.7971	57.4273	1.03822	0.0541106	6.8285	0.0297254	0.863115	0.936841
MT0083	39.502	37.9786	55.2916	49.0352	1.34645	0.42916	7.93971	1.39516	0.237536	0.523094	Rv0077c	Rv0077c	probable oxidoreductase
MT0084	53.4438	76.4423	84.6012	65.8194	1.15859	0.212373	5.97814	0.470483	0.492765	0.746161	Rv0078	Rv0078	transcriptional regulator (TetR/AcrR family)
MT0085	257.111	251.227	219.076	169.891	0.7652	-0.386091	7.78351	1.13603	0.286492	0.572522
MT0085.1	231.9	159.884	162.974	133.2	0.755934	-0.403669	7.44755	1.14828	0.283909	0.570391
MT0086	2358.04	1979.67	1096.45	819.156	0.441619	-1.17913	10.3158	7.25977	0.00705162	0.0708804	Rv0079	Rv0079	hypothetical protein
MT0087	457.351	296.067	208.111	149.252	0.474329	-1.07604	8.17586	7.50124	0.00616567	0.0645696	Rv0080	Rv0080	hypothetical protein
MT0088	43.336	54.0571	43.8152	33.3732	0.792978	-0.334647	5.17018	1.17999	0.277358	0.561186	Rv0081	Rv0081	transcriptional regulator (ArsR family)
MT0089	118.971	85.3133	102.648	72.3574	0.856631	-0.223254	6.43369	0.509102	0.475528	0.735305	Rv0082	Rv0082	probable oxidoreductase subunit
MT0090	69.7674	45.1169	58.3633	52.4018	0.963781	-0.0532233	5.81439	0.0290409	0.864685	0.937712	Rv0083	Rv0083	probable oxidoreductase subunit
MT0091	108.572	64.9379	82.6387	66.0633	0.856857	-0.222873	6.25964	0.418824	0.517524	0.763937	Rv0084	hycD	formate hydrogenlyase subunit 4
MT0092	29.0456	16.7716	24.6167	19.9068	0.970971	-0.0424994	4.51975	0.014229	0.905049	0.956849	Rv0085	hycP	putative formate hydrogen lyase hycP
MT0093	99.6263	67.2942	95.0111	60.8915	0.933925	-0.0986221	6.20626	0.0834713	0.772647	0.902412	Rv0086	hycQ	probable formate hydrogenlyase subunit
MT0096	428.074	443.754	490.67	520.749	1.16011	0.214265	8.66183	0.370454	0.542757	0.784049	Rv0088	Rv0088	hypothetical protein
MT0098	41.2447	43.8695	56.3582	70.9425	1.49552	0.580644	5.61163	3.98939	0.0457876	0.218532	Rv0089	Rv0089	possible bioC biotin synthesis gene
MT0099	9.70122	12.9599	15.1881	20.5411	1.5778	0.65791	3.80954	4.42355	0.0354462	0.183867	Rv0090	Rv0090	hypothetical protein
MT0099.1	3.07883	4.22755	4.35165	5.95253	1.41275	0.498507	2.33501	2.13582	0.143893	0.412387
MT0100	90.6222	130.084	181.66	152.473	1.51421	0.598563	6.74337	3.26537	0.0707572	0.280359	Rv0091	Rv0091	conserved hypothetical protein
MT0101	219.178	159.746	190.79	180.918	0.980891	-0.0278355	7.60213	0.00607427	0.937878	0.974514	Rv0092	ctpA	cation-transporting ATPase
MT0102	61.9251	38.9489	22.1849	20.8339	0.426385	-1.22977	5.47212	11.4267	0.000723946	0.0151067	Rv0093c	Rv0093c	hypothetical protein
MT0103	68.2571	45.1169	108.919	98.8511	1.83196	0.87339	5.99486	5.89375	0.0151947	0.111429	Rv1588c	Rv1588c	REP-family protein
MT0105	32.8215	35.0678	20.9903	23.9077	0.661351	-0.596513	4.52082	3.98541	0.0458958	0.218643	Rv0096	PPE	PPE-family protein
MT0106	87.311	114.074	75.4286	62.2088	0.683656	-0.548656	6.06755	3.31785	0.0685314	0.274089	Rv0097	Rv0097	conserved hypothetical protein
MT0107	26.0829	31.7412	27.2618	22.9807	0.869537	-0.201681	4.45718	0.478879	0.488931	0.744309	Rv0098	Rv0098	hypothetical protein
MT0108	52.6306	54.6116	73.8501	52.353	1.17704	0.235163	5.64165	0.562248	0.453356	0.720587	Rv0099	fadD10	acyl-CoA synthase
MT0109	9.93358	9.70256	8.78863	6.87956	0.798789	-0.324114	2.91739	1.13011	0.287752	0.574267	Rv0100	Rv0100	hypothetical protein
MT0110	187.518	157.944	200.731	160.572	1.04583	0.0646551	7.25959	0.0356702	0.850198	0.931948	Rv0101	nrp	unknown non-ribosomal peptide synthase
MT0111	335.128	200.15	231.96	206.241	0.818601	-0.288768	8.0176	0.493419	0.482406	0.740814	Rv0102	Rv0102	membrane protein
MT0112	334.431	318.106	347.961	329.536	1.03825	0.0541515	8.29083	0.0280169	0.867069	0.938835	Rv0103c	ctpB	cation transport ATPase
MT0113	15.278	18.227	20.6063	21.8585	1.26811	0.342685	3.94224	1.43777	0.2305	0.514208	Rv0104	Rv0104	hypothetical protein
MT0115	16.2655	13.1678	37.2877	25.5666	2.13409	1.09362	4.18013	12.0656	0.000513601	0.0122711	Rv0106	Rv0106	conserved hypothetical protein
MT0116	263.153	255.177	114.124	144.324	0.4986	-1.00404	7.72942	9.02361	0.00266515	0.037709	Rv0107c	ctpI	probable magnesium transport ATPase
MT0117	464.322	653.121	367.629	325.828	0.620595	-0.688276	8.95698	2.68201	0.101488	0.339837
MT0118	31.3692	24.3257	24.7873	25.0299	0.893929	-0.161768	4.84697	0.30494	0.580802	0.805212	Rv0109	PE_PGRS	PE_PGRS-family protein
MT0119	31.253	29.4542	22.9955	25.9569	0.806145	-0.310888	4.88842	1.1592	0.281632	0.567048	Rv0110	Rv0110	transmembrane protein
MT0120	251.709	263.771	282.303	259.765	1.0516	0.0725817	7.93431	0.0501342	0.82283	0.923468	Rv0111	Rv0111	possible acyltransferase
MT0121	38.224	70.4129	47.4842	71.1864	1.09261	0.127777	5.90891	0.0920748	0.761556	0.899311	Rv0112	gca	probable GDP-mannose dehydratase
MT0122	54.4895	95.3623	77.8178	112.171	1.26804	0.342606	6.56779	0.678933	0.409954	0.685416	Rv0113	gmhA	phosphoheptose isomerase
MT0123	32.1825	38.1865	32.5947	43.473	1.08101	0.112383	5.32058	0.126198	0.722407	0.879381	Rv0115	Rv0115	conserved hypothetical protein
MT0124	16.4398	51.3543	33.832	98.7047	1.95555	0.967577	5.33408	2.68384	0.101371	0.339837
MT0125	359.294	208.882	401.632	250.104	1.14703	0.197901	8.07746	0.189439	0.663384	0.852464	Rv0116c	Rv0116c	conserved hypothetical protein
MT0125.1	18.9958	21.0684	22.8675	27.5671	1.25884	0.332099	4.58226	1.23976	0.265518	0.550346	Rv0117	oxyS	transcriptional regulator (LysR family)
MT0126	25.7344	33.4045	21.417	32.1534	0.905885	-0.1426	5.01603	0.189758	0.663118	0.852397	Rv0118c	oxcA	oxalyl-CoA decarboxylase
MT0127	40.3152	66.4626	62.2883	70.6009	1.2449	0.316035	5.79693	0.664406	0.415009	0.690869	Rv0119	fadD7	acyl-CoA synthase
MT0128	154.987	207.496	420.916	375.449	2.19712	1.13561	7.83031	10.6631	0.00109296	0.0199128	Rv0120c	fusA2	elongation factor G
MT0129	56.0579	23.702	44.1138	29.2747	0.919783	-0.120634	5.26453	0.0660089	0.797239	0.914037
MT0131	100.207	151.013	109.474	85.9214	0.77797	-0.362214	6.79148	1.10673	0.292794	0.579153	Rv0123	Rv0123	hypothetical protein
MT0132	2.96265	2.28703	3.28507	4.63517	1.49967	0.584648	2.18719	2.17555	0.140219	0.40571	Rv0124	PE_PGRS	PE_PGRS-family protein
MT0133	155.626	170.211	217.327	289.381	1.55507	0.636979	7.66175	3.51978	0.0606405	0.256853	Rv0125	pepA	probable serine protease
MT0134	665.608	407.646	439.773	408.871	0.790697	-0.338804	8.81503	0.782383	0.376413	0.655561	Rv0126	Rv0126	probable glycosyl hydrolase
MT0135	267.626	144.083	151.028	151.009	0.733548	-0.447037	7.51306	1.23569	0.266302	0.551113	Rv0127	Rv0127	conserved hypothetical protein
MT0136	43.4522	66.116	82.852	84.7016	1.52979	0.61333	5.91675	3.57015	0.0588271	0.254262	Rv0128	Rv0128	hypothetical protein
MT0137	4017	3799.94	1823.77	2665.27	0.574269	-0.8002	11.5465	3.00428	0.0830449	0.308136	Rv0129c	fbpC2	antigen 85C, mycolytransferase
MT0138	47.4024	70.898	57.9794	66.7464	1.05466	0.0767763	5.68757	0.0614949	0.804149	0.917254	Rv0130	Rv0130	conserved hypothetical protein
MT0139	128.498	137.846	124.321	151.058	1.03391	0.0481041	6.9694	0.0246211	0.875315	0.943182	Rv0131c	fadE1	acyl-CoA dehydrogenase
MT0140	103.228	37.4242	41.2554	28.738	0.497573	-1.00702	6.07089	4.67961	0.0305226	0.166829	Rv0132c	Rv0132c	putative oxidoreductase
MT0141	63.726	58.354	51.9212	68.942	0.989772	-0.0148325	6.17638	0.00250422	0.960089	0.983506	Rv0133	Rv0133	possible puromycin N-acetyltransferase
MT0142	291.037	196.408	280.127	149.35	0.881081	-0.182654	7.82049	0.173691	0.676852	0.858648	Rv0134	ephF	probable epoxide hydrolase
MT0143	171.601	209.298	233.027	204.435	1.14858	0.199845	7.54414	0.360354	0.54831	0.787352	Rv0135c	Rv0135c	putative transcriptional regulator
MT0144	114.788	133.687	79.2257	82.1157	0.649378	-0.622869	6.71537	3.7395	0.0531405	0.238236	Rv0136	Rv0136	cytochrome p450
MT0145	232.887	199.18	281.321	177.942	1.06296	0.088088	7.60013	0.0657265	0.797664	0.914037	Rv0137c	Rv0137c	putative peptide methionine sulfoxide
MT0146	40.8381	48.097	45.3937	49.9622	1.07237	0.1008	5.6387	0.115375	0.734106	0.883318	Rv0138	Rv0138	conserved hypothetical protein
MT0147	38.8049	35.8302	39.7195	47.913	1.17374	0.231117	5.51228	0.652927	0.419068	0.692661	Rv0139	Rv0139	putative oxidoreductase
MT0148	43.1617	48.3049	57.8514	61.7209	1.30742	0.386718	5.57495	1.90184	0.167872	0.443877	Rv0140	Rv0140	conserved hypothetical protein
MT0149	231.319	235.149	120.353	124.662	0.525266	-0.928881	7.60252	8.39002	0.00377287	0.0464622	Rv0141c	Rv0141c	hypothetical protein
MT0150	18.7634	21.2763	11.903	15.7108	0.689562	-0.536248	4.38888	2.97814	0.0843964	0.310934	Rv0142	Rv0142	hypothetical protein
MT0151	209.128	175.686	186.14	170.233	0.926062	-0.11082	7.67027	0.112934	0.736828	0.884015	Rv0143c	Rv0143c	probable chloride channel
MT0152	205.701	304.383	185.073	253.275	0.859398	-0.218602	8.13415	0.370888	0.542521	0.784012	Rv0144	Rv0144	putative transcriptional regulator
MT0153	217.726	280.196	238.914	319.241	1.12099	0.164769	8.9765	0.187158	0.665293	0.853543	Rv0145	Rv0145	conserved hypothetical protein
MT0154	95.6761	119.549	114.423	166.134	1.30357	0.382463	8.43453	1.0461	0.306407	0.592902	Rv0146	Rv0146	conserved hypothetical protein
MT0155	507.426	410.141	417.119	410.09	0.901508	-0.149588	9.0226	0.16859	0.681368	0.861089	Rv0147	Rv0147	aldehyde dehydrogenase
MT0156	522.123	506.127	552.105	510.356	1.03327	0.0472196	9.26468	0.0170259	0.896184	0.953031	Rv0148	Rv0148	steroid dehydrogenase
MT0157	187.925	217.892	256.747	226.684	1.19131	0.252552	7.99684	0.571549	0.449644	0.717674	Rv0149	Rv0149	putative oxidoreductase
MT0158	1.80083	1.8019	2.38914	2.58594	1.3783	0.462893	1.11806	1.77685	0.182536	0.46239
MT0160	73.4853	76.5117	73.8927	68.942	0.95233	-0.0704669	6.13534	0.062407	0.802731	0.916685
MT0161	21.029	25.9197	27.6458	25.9081	1.14138	0.190774	4.61458	0.390328	0.532127	0.776389	Rv0152c	PE	PE-family protein
MT0162	134.713	97.0256	83.8333	93.484	0.765022	-0.386426	6.84673	1.43591	0.230802	0.514469	Rv0153c	Rv0153c	putative protein-tyrosine-phosphatase
MT0163	349.36	244.297	241.431	229.368	0.793012	-0.334586	8.10389	0.935412	0.33346	0.618154	Rv0154c	fadE2	acyl-CoA dehydrogenase
MT0165	254.033	260.999	186.95	226.343	0.802449	-0.317519	8.00971	0.93501	0.333564	0.618154	Rv0157	pntB	pyridine transhydrogenase subunit [beta]
MT0167	80.0496	102.154	83.62	118.758	1.11076	0.15155	6.8889	0.214481	0.643278	0.841258	Rv0158	Rv0158	transcriptional regulator (TetR/AcrR family)
MT0168	46.4148	63.7597	67.6212	66.9904	1.22218	0.289456	5.77299	0.815992	0.366355	0.647654	Rv0159c	PE	PE-family protein
MT0169	15.1618	12.6826	17.108	15.5156	1.17083	0.227526	3.96593	0.609793	0.434866	0.706409	Rv0160c	PE	PE-family protein
MT0171	14.1161	11.851	14.1215	15.3692	1.13437	0.181888	4.03699	0.387268	0.533739	0.777516	Rv0162c	adhE	alcohol dehydrogenase (Zn)
MT0172	35.4356	24.8801	16.1267	13.9543	0.498686	-1.0038	4.6638	7.47059	0.00627148	0.0649837	Rv0163	Rv0163	probable dehydrogenase
MT0173	403.966	596.223	792.854	739.919	1.53252	0.615906	9.29905	2.15987	0.141657	0.407546	Rv0164	Rv0164	conserved hypothetical protein
MT0175	191.643	329.263	151.241	218.146	0.709156	-0.495825	7.47375	1.58334	0.20828	0.488174	Rv0166	fadD5	acyl-CoA synthase
MT0176	203.319	291.493	178.119	258.35	0.882115	-0.180962	7.60436	0.262378	0.608491	0.823729
MT0177	12.2572	12.1975	12.5003	12.6857	1.02982	0.0423876	3.66093	0.0209761	0.884844	0.946466
MT0178	524.795	651.666	421.3	543.632	0.820203	-0.285947	8.76098	0.633787	0.425969	0.699738	Rv0169	mce1	cell invasion protein
MT0179	308.057	386.855	249.239	306.702	0.800028	-0.321877	7.98837	0.86722	0.351726	0.635592	Rv0170	Rv0170	part of mce1 operon
MT0180	705.052	806.63	564.435	594.472	0.766641	-0.383378	9.06242	1.07699	0.299373	0.586587	Rv0171	Rv0171	part of mce1 operon
MT0181	713.533	847.796	587.857	663.219	0.801295	-0.319595	9.12815	0.795491	0.372445	0.652064	Rv0172	Rv0172	part of mce1 operon
MT0182	450.729	596.223	371.128	425.948	0.761344	-0.393379	8.4958	1.23402	0.266627	0.551165	Rv0173	lprK	part of mce1 operon
MT0183	1151.19	1425.24	1099.05	1124.3	0.862962	-0.212631	10.0095	0.314261	0.575077	0.801452	Rv0174	Rv0174	part of mce1 operon
MT0184	213.136	230.713	220.1	245.03	1.04795	0.0675674	7.84664	0.0410189	0.839501	0.928572	Rv0175	Rv0175	conserved hypothetical protein
MT0185	130.531	160.993	155.806	153.546	1.06123	0.085742	7.16141	0.0647506	0.799139	0.914622	Rv0176	Rv0176	conserved hypothetical protein
MT0186	218.771	254.9	249.409	248.982	1.05222	0.0734409	7.83694	0.0507901	0.821694	0.923468	Rv0177	Rv0177	conserved hypothetical protein
MT0187	416.339	380.687	473.221	429.704	1.13286	0.17997	8.68338	0.249304	0.617566	0.829665	Rv0178	Rv0178	conserved hypothetical protein
MT0188	293.767	435.992	233.837	316.07	0.753563	-0.4082	8.40901	0.998157	0.317757	0.602877	Rv0179c	lprO	lipoprotein
MT0189	131.17	181.299	160.201	195.214	1.13752	0.185893	7.3371	0.318423	0.572557	0.799696
MT0190	129.543	105.619	64.9761	62.7455	0.543104	-0.880699	6.62031	6.81995	0.00901449	0.081383	Rv0181c	Rv0181c	conserved hypothetical protein
MT0191	300.447	173.399	137.504	143.934	0.593901	-0.751706	7.70059	3.53471	0.0600969	0.255364	Rv0182c	sigG	sigma-70 factors ECF subfamily
MT0192	200.531	168.617	153.673	161.597	0.853998	-0.227696	7.46459	0.516843	0.472191	0.734715	Rv0183	Rv0183	Probable oxidoreductase
MT0193	74.7633	78.5215	81.3588	120.905	1.31939	0.399873	6.57402	1.54183	0.214346	0.49621	Rv0184	Rv0184	conserved hypothetical protein
MT0194	33.0539	36.0381	32.4667	45.7662	1.13214	0.179049	5.27659	0.296319	0.586199	0.80799	Rv0185	Rv0185	conserved hypothetical protein
MT0195	194.489	182.824	173.341	206.387	1.00635	0.00913544	7.56213	0.000803944	0.97738	0.988705	Rv0186	bglS	[beta]-glucosidase
MT0196	1009.22	892.428	752.537	356.42	0.58317	-0.778013	9.47495	3.11942	0.0773645	0.295342
MT0197	72.6139	47.4733	45.735	44.2537	0.749086	-0.416797	5.93871	1.81593	0.177798	0.458036	Rv0187	Rv0187	probable o-methyltransferase
MT0198	690.413	432.319	438.365	240.687	0.604827	-0.725406	8.83808	1.59623	0.206438	0.486525	Rv0188	Rv0188	putative methyltransferase
MT0199	345.468	375.766	264.086	261.277	0.728436	-0.457126	8.27639	1.93808	0.163877	0.438969	Rv0189c	ilvD	dihydroxy-acid dehydratase
MT0200	331.178	324.204	829.416	481.472	2.0002	1.00015	8.81581	7.1544	0.00747803	0.0727687	Rv0190	Rv0190	conserved hypothetical protein
MT0201	74.589	81.4322	222.361	151.546	2.39668	1.26104	6.91489	13.8955	0.000193262	0.00593166	Rv0191	Rv0191	probable chloramphenicol resistance protein
MT0202	205.875	190.586	180.338	190.92	0.936401	-0.0948013	7.66284	0.0882858	0.766368	0.90081	Rv0192	Rv0192	conserved hypothetical protein
MT0203	18.7634	24.5336	19.7531	22.9807	0.987453	-0.0182161	4.53044	0.00317955	0.955033	0.980787	Rv0193c	Rv0193c	hypothetical protein
MT0204	27.5933	22.3852	20.5637	19.9556	0.810418	-0.303261	4.52984	0.941698	0.331841	0.617967	Rv0194	Rv0194	Probable ABC transporter
MT0205	4.06638	5.33641	9.85521	7.75781	1.87913	0.910065	2.27647	7.7261	0.00544281	0.058694	Rv0195	Rv0195	transcriptional regulator (LuxR/UhpA family)
MT0206	28.6389	66.6012	89.8061	108.073	2.0786	1.05561	5.94709	6.0906	0.0135903	0.104682	Rv0196	Rv0196	transcriptional regulator (TetR/AcrR family)
MT0207	127.859	240.346	231.405	337.343	1.54478	0.627401	7.66854	2.4583	0.116905	0.371378	Rv0197	Rv0197	conserved hypothetical protein
MT0208	511.318	684.655	710.727	740.993	1.21386	0.279603	9.24207	0.556686	0.455599	0.722224	Rv0198c	Rv0198c	probable zinc metalloprotease
MT0209	88.8794	75.68	39.4635	44.0585	0.507473	-0.978598	5.9918	10.6297	0.00111288	0.0201835
MT0210	171.717	116.916	68.2612	73.0405	0.489502	-1.03061	6.98209	8.56306	0.00343053	0.0438432	Rv0200	Rv0200	probable membrane protein
MT0211	66.7467	56.8986	75.4286	70.2594	1.17809	0.236446	6.24338	0.677426	0.410474	0.685556
MT0212	676.123	495.662	752.665	561.977	1.1219	0.165944	9.32669	0.196174	0.657827	0.849496	Rv0202c	mmpL11	conserved large membrane protein
MT0213	70.116	81.2936	115.105	141.299	1.69346	0.759977	6.6943	3.72158	0.0537135	0.239193	Rv0203	Rv0203	hypothetical protein
MT0214	181.012	166.191	172.871	173.063	0.996316	-0.00532492	7.4329	0.000288708	0.986443	0.992345	Rv0204c	Rv0204c	probable membrane protein
MT0215	53.56	75.4721	64.5922	78.7491	1.11114	0.152036	6.01915	0.239753	0.624385	0.834465	Rv0205	Rv0205	probable membrane protein
MT0216	855.973	1057.3	984.753	1175.82	1.12926	0.175375	10.0889	0.184042	0.667922	0.854992	Rv0206c	mmpL3	conserved large membrane protein
MT0217	170.207	212.971	186.865	228.245	1.08336	0.115517	7.84029	0.103184	0.748042	0.890951	Rv0207c	Rv0207c	conserved hypothetical protein
MT0218	93.4105	108.253	78.1164	112.171	0.943565	-0.0838062	6.90003	0.0590146	0.80806	0.918826
MT0219	15.2199	17.5339	15.9987	18.3943	1.0503	0.0708026	4.35447	0.055611	0.813572	0.920634	Rv0209	Rv0209	hypothetical protein
MT0220	26.78	25.3653	22.1422	24.7859	0.899678	-0.15252	4.92693	0.279145	0.597262	0.814445	Rv0210	Rv0210	hypothetical protein
MT0221	2573.32	2811.53	3005.41	1691.45	0.87224	-0.197203	11.734	0.167511	0.682333	0.861089	Rv0211	pckA	phosphoenolpyruvate carboxykinase
MT0222	60.0081	47.9584	69.2851	48.8888	1.09448	0.130244	5.65179	0.152727	0.695943	0.868699	Rv0212c	nadR	similar to E.coli NadR
MT0223	37.2945	33.4045	37.8423	27.6158	0.92601	-0.1109	4.96034	0.135469	0.712827	0.876751	Rv0213c	Rv0213c	some similarity to methyltransferases
MT0224	72.3235	66.0467	53.3291	57.3297	0.799635	-0.322586	5.94159	1.23343	0.266742	0.551165	Rv0214	fadD4	acyl-CoA synthase
MT0225	59.1368	56.6214	50.3426	45.3759	0.826928	-0.274166	5.68156	0.938754	0.332598	0.618053	Rv0215c	fadE3	acyl-CoA dehydrogenase
MT0226	33.7509	34.5827	30.7602	32.8365	0.930664	-0.103667	4.93326	0.128621	0.719866	0.879381	Rv0216	Rv0216	conserved hypothetical protein
MT0227	27.6514	27.6523	18.0466	20.9314	0.704661	-0.504998	4.64408	3.03405	0.0815343	0.305262	Rv0217c	lipW	probable esterase
MT0228	16.8464	16.0092	27.5605	20.9802	1.47753	0.563183	4.23454	3.5587	0.059234	0.254262	Rv0218	Rv0218	some similarity with sulphitesulfite oxidases
MT0229	7.55185	9.77187	9.34325	9.27034	1.07634	0.106136	2.9833	0.11872	0.730426	0.881261	Rv0219	Rv0219	hypothetical protein
MT0230	1123.48	760.681	587.772	574.322	0.616763	-0.697212	9.68774	2.83571	0.0921898	0.326966	Rv0220	lipC	probable esterase
MT0231	166.722	146.024	121.42	108.561	0.735356	-0.443484	7.04176	1.95369	0.16219	0.436371	Rv0221	Rv0221	conserved hypothetical protein
MT0232	68.7218	60.8489	55.2489	53.0361	0.835657	-0.259018	5.92657	0.753927	0.385236	0.664216	Rv0222	echA1	enoyl-CoA hydratase/isomerase superfamily
MT0233	126.639	100.768	102.605	77.3829	0.791477	-0.33738	6.54889	1.2102	0.271292	0.55596	Rv0223c	Rv0223c	aldehyde dehydrogenase (possible betB)
MT0234	9.99167	10.7421	13.4816	14.8325	1.36563	0.449567	3.48892	2.10065	0.147237	0.417685
MT0235	90.4479	89.818	105.549	113.147	1.21314	0.278743	6.66694	0.833052	0.361392	0.644016	Rv0225	Rv0225	possible involved in LPS synthesis
MT0236	17.6016	16.5637	25.8966	28.8844	1.60261	0.68042	4.60616	5.06817	0.0243691	0.145558	Rv0226c	Rv0226c	probable membrane protein
MT0237	662.123	1093.69	942.559	1174.06	1.20551	0.269643	9.68869	0.332319	0.564297	0.797007	Rv0227c	Rv0227c	possible membrane protein
MT0238	25.6182	22.108	17.9186	18.1503	0.75548	-0.404535	4.59051	1.8727	0.171166	0.449903
MT0239	120.016	132.648	117.367	112.22	0.908724	-0.138086	6.83636	0.204039	0.65148	0.846437	Rv0229c	Rv0229c	conserved hypothetical protein
MT0240	237.941	208.259	134.133	177.795	0.699028	-0.516578	7.55167	2.41455	0.120212	0.376847	Rv0230c	Rv0230c	conserved hypothetical protein
MT0241	119.319	191.071	122.572	186.675	0.996372	-0.00524341	7.16335	0.000176625	0.989396	0.993627	Rv0231	fadE4	acyl-CoA dehydrogenase
MT0242	232.887	177.21	174.535	171.696	0.844211	-0.244325	7.37877	0.572478	0.449276	0.717674	Rv0232	Rv0232	transcriptional regulator (TetR/AcrR family)
MT0244	141.626	142.073	113.186	146.032	0.913652	-0.130283	6.82768	0.17414	0.676458	0.858482	Rv0233	nrdB	ribonucleoside-diphosphate reductase B2
MT0245	214.414	190.378	158.11	163.402	0.794238	-0.332357	7.55703	1.08342	0.297934	0.585019
MT0246	81.9085	47.7505	35.0692	29.5187	0.498104	-1.00548	5.59275	5.25126	0.0219309	0.137154	Rv0235c	Rv0235c	conserved hypothetical protein
MT0247	129.485	111.857	133.664	130.175	1.09314	0.128475	6.99384	0.176567	0.67434	0.858233	Rv0236c	Rv0236c	possible membrane protein
MT0250	215.402	214.496	263.744	285.038	1.27652	0.352218	7.89803	1.12335	0.289197	0.575629
MT0251	62.6803	74.2246	76.2819	109.585	1.35763	0.441085	6.39928	1.59292	0.206909	0.487349	Rv0237	lpqI	beta-hexosaminidase precursorBETA-HEXOSAMINIDASE A
MT0252	131.751	127.381	101.496	119.734	0.853685	-0.228223	7.11149	0.546634	0.459696	0.725549	Rv0238	Rv0238	transcriptional regulator (TetR/AcrR family)
MT0253	109.734	113.381	102.008	128.516	1.03315	0.047055	7.01332	0.0223674	0.881114	0.944812	Rv0239	Rv0239	conserved hypothetical protein
MT0254	16.4979	19.5437	21.5449	21.1754	1.186	0.246101	4.32225	0.682587	0.408697	0.684882	Rv0240	Rv0240	hypothetical protein
MT0255	271.402	350.817	159.817	223.074	0.615366	-0.700482	8.29616	4.08557	0.0432509	0.209177	Rv0241c	Rv0241c	hypothetical protein
MT0256	247.701	216.229	106.658	153.156	0.559987	-0.836534	7.98878	5.40748	0.0200507	0.130297	Rv0242c	fabG4	3-oxoacyl-[ACP] reductase
MT0257	634.936	637.805	439.815	552.366	0.779557	-0.359274	9.60159	0.923568	0.33654	0.620515	Rv0243	fadA2	acetyl-CoA C-acetyltransferase
MT0258	343.086	721.871	278.207	440.292	0.674688	-0.567708	11.861	1.20849	0.271631	0.556356	Rv0244c	fadE5	acyl-CoA dehydrogenase
MT0259	175.551	142.42	197.787	139.641	1.06118	0.0856642	7.6624	0.0609789	0.804955	0.917387	Rv0245	Rv0245	probable monooxygenase
MT0260	38.8049	38.1865	50.044	34.3002	1.0958	0.131989	5.38342	0.193994	0.659613	0.849808	Rv0246	Rv0246	probable membrane transport protein
MT0261	524.098	754.236	340.623	392.623	0.573606	-0.801868	9.12583	3.58154	0.058425	0.253387	Rv0247c	Rv0247c	probable iron-sulphur protein
MT0262	675.368	880.023	489.774	572.516	0.682981	-0.550083	9.50667	1.92862	0.164909	0.439533	Rv0248c	Rv0248c	probable flavoprotein subunit of Rv0247c
MT0263	336.696	526.572	324.539	365.398	0.799242	-0.323295	8.72557	0.658685	0.417025	0.691574
MT0264	282.846	371.885	272.661	292.894	0.863823	-0.211192	7.947	0.305073	0.58072	0.805212	Rv0250c	Rv0250c	hypothetical protein
MT0265	197.8	281.513	81.0175	58.3543	0.290836	-1.78172	7.60166	19.2492	1.14718e-05	0.00070419	Rv0251c	hsp	possible heat shock protein
MT0266	45.4854	54.7502	45.8203	38.2035	0.838603	-0.253941	5.89576	0.693987	0.404811	0.682603	Rv0252	nirB	nitrite reductase flavoprotein
MT0267	9.58504	9.49465	11.5191	11.6123	1.21211	0.277523	3.51362	0.8674	0.351676	0.635592
MT0268	35.3194	45.1862	36.2638	40.5455	0.954379	-0.0673659	5.53669	0.0521849	0.819304	0.922209	Rv0255c	cobQ	cobyric acid synthase
MT0269	76.3317	105.481	82.852	91.142	0.957118	-0.0632306	6.56493	0.0289506	0.864893	0.937712	Rv0256c	PPE	PPE-family protein
MT0270	19.751	29.177	24.2327	25.469	1.01674	0.0239557	4.72719	0.00621565	0.93716	0.974514
MT0270.1	4.53111	3.53451	3.92502	4.00088	0.979271	-0.0302197	2.21159	0.00901613	0.924352	0.967514
MT0270.2	9.46885	3.3959	4.05301	3.12264	0.556831	-0.844689	2.82613	2.74796	0.0973787	0.334949
MT0271	34.5061	22.3159	22.6968	18.004	0.716133	-0.481701	4.72078	1.33407	0.248082	0.532748	Rv0258c	Rv0258c	conserved hypothetical protein
MT0272	8.36512	7.20762	27.7738	17.8088	2.9245	1.54819	3.75613	20.5659	5.76123e-06	0.00043224	Rv0259c	Rv0259c	conserved hypothetical protein
MT0273	22.3651	10.95	48.6788	15.2717	1.91871	0.940136	5.20285	1.73377	0.18793	0.468379	Rv0260c	Rv0260c	two-component response regulator
MT0274	7.31948	5.82154	14.8041	9.66067	1.85967	0.895049	2.92551	6.96468	0.00831345	0.0778329	Rv0261c	narK3	nitrite extrusion protein1
MT0275	79.8753	67.2942	53.6704	56.793	0.750466	-0.414142	6.19716	1.91371	0.166552	0.441501	Rv0262c	Rv0262c	aminoglycoside 2'-N-acetyltransferase
MT0276	127.684	69.5812	33.7893	46.7908	0.408328	-1.2922	6.48695	12.7297	0.000359893	0.00950974	Rv0263c	Rv0263c	conserved hypothetical protein
MT0277	60.1243	42.8992	20.6917	28.4941	0.477113	-1.0676	5.617	11.0239	0.000899455	0.017679	Rv0264c	Rv0264c	conserved hypothetical protein
MT0278	227.427	129.46	72.3995	65.4778	0.386324	-1.37212	7.12526	10.971	0.000925474	0.0180129	Rv0265c	fecB2	iron transport protein FeIII dicitrate transporter
MT0280	3.54356	3.81172	5.33291	4.00088	1.27098	0.345942	2.2465	0.734121	0.391551	0.671374	Rv0267	narU	similar to nitrite extrusion protein 2
MT0281	118.215	170.765	129.312	116.27	0.849971	-0.234515	6.98684	0.530106	0.466562	0.731477	Rv0268c	Rv0268c	hypothetical protein
MT0282	59.95	42.5527	41.81	41.7653	0.815098	-0.294955	5.66431	0.751714	0.385934	0.6646	Rv0269c	Rv0269c	conserved hypothetical protein
MT0283	774.355	620.826	390.198	401.406	0.567379	-0.817614	9.04414	4.96829	0.0258162	0.150815	Rv0270	fadD2	acyl-CoA synthase
MT0284	494.878	474.109	295.528	276.061	0.589889	-0.761484	8.90632	3.97639	0.0461422	0.218952	Rv0271c	fadE6	acyl-CoA dehydrogenase
MT0285	120.539	141.311	145.567	123.539	1.02783	0.0395953	7.12788	0.0159948	0.89936	0.955105	Rv0272c	Rv0272c	hypothetical protein
MT0286	46.1244	42.2062	62.075	53.524	1.30862	0.388043	5.90807	1.67536	0.195543	0.47692	Rv0273c	Rv0273c	putative transcriptional regulator
MT0286.1	159.344	148.796	94.4564	100.656	0.633191	-0.659288	7.31707	2.85518	0.0910803	0.325134	Rv0274	Rv0274	hypothetical protein
MT0287	1112.45	671.764	1466.59	656.828	1.19011	0.251097	9.65982	0.277339	0.598451	0.815512	Rv0275c	fadD27	acyl-CoA synthase
MT0288	987.724	807.461	440.626	442.585	0.491989	-1.0233	9.71576	5.86759	0.0154222	0.112085	Rv0276	Rv0276	conserved hypothetical protein
MT0289	137.734	135.975	270.997	227.221	1.82024	0.864129	7.54166	6.70758	0.00960037	0.0847466
MT0290	291.443	271.88	457.009	358.176	1.4471	0.533162	8.44315	2.43661	0.118532	0.373574
MT0291	35.668	22.3852	22.4835	17.6624	0.691257	-0.532706	4.69593	2.63357	0.104626	0.345865
MT0291.4	8.19085	5.47502	5.84487	5.07429	0.797936	-0.325654	2.78284	0.659317	0.416801	0.691491
MT0292	27.419	47.404	50.3853	26.1033	1.02328	0.0332072	4.87131	0.00813613	0.928128	0.969563	Rv0280	PPE	PPE-family protein
MT0293	239.219	260.306	216.601	211.949	0.857938	-0.221055	7.95585	0.460165	0.497547	0.749137	Rv0281	Rv0281	conserved hypothetical protein
MT0294	3.31119	4.29685	6.05818	7.07473	1.72692	0.788199	2.84532	2.23441	0.134968	0.397727
MT0295	834.421	1150.65	1274.22	1641.68	1.46892	0.554755	10.4333	1.486	0.222838	0.505758	Rv0282	Rv0282	conserved hypothetical protein
MT0296	351.684	487.069	478.511	571.589	1.252	0.324237	9.09557	0.666575	0.414248	0.690414	Rv0283	Rv0283	conserved hypothetical protein
MT0297	1352.94	2404.43	1895.78	2102.66	1.06416	0.0897214	11.0159	0.0329026	0.856061	0.933761	Rv0284	Rv0284	conserved hypothetical protein
MT0298	21.029	43.1071	37.885	51.7675	1.39842	0.483801	5.9979	1.05987	0.303245	0.590052
MT0299	586.488	1137.56	910.007	980.606	1.09664	0.133084	9.91823	0.0837651	0.772258	0.902412	Rv0286	PPE	PPE-family protein
MT0300	399.551	975.454	760.515	1241.59	1.4561	0.542105	9.81547	1.00093	0.317086	0.602542	Rv0287	Rv0287	conserved hypothetical protein
MT0301	435.103	769.067	674.549	1049.45	1.43171	0.51774	9.58834	1.18079	0.277196	0.561142	Rv0288	Rv0288	conserved hypothetical protein
MT0302	475.302	668.507	740.677	764.51	1.31597	0.396126	9.56548	1.07532	0.299746	0.586587	Rv0289	Rv0289	conserved hypothetical protein
MT0303	286.68	318.313	498.691	447.464	1.56393	0.64518	8.86286	3.40268	0.0650906	0.267193
MT0304	323.974	336.54	548.095	391.062	1.42188	0.5078	8.83071	2.01316	0.15594	0.430166	Rv0291	Rv0291	secreted protease
MT0305	140.232	149.004	256.193	257.13	1.77476	0.827624	7.83178	5.90814	0.0150711	0.110988	Rv0292	Rv0292	unknown possible membrane protein
MT0306	492.787	307.433	320.572	216.145	0.67071	-0.576239	8.56086	1.63667	0.200783	0.481733	Rv0293c	Rv0293c	conserved hypothetical protein
MT0307	8.30703	9.84117	14.7188	14.735	1.62389	0.69945	3.46811	3.84961	0.0497575	0.230049	Rv0294	Rv0294	conserved hypothetical protein
MT0308	64.7716	68.4031	82.2974	102.559	1.388	0.473005	6.29757	2.38137	0.12279	0.38114	Rv0295c	Rv0295c	hypothetical protein
MT0310	125.419	180.953	182.001	249.03	1.40697	0.49259	7.3744	1.73371	0.187938	0.468379	Rv0296c	atsG	proable arylsulfatase
MT0311	114.73	103.055	97.4002	98.8511	0.901067	-0.150293	6.86687	0.249454	0.61746	0.829665	Rv0297	PE_PGRS	PE_PGRS-family protein
MT0312	139.419	172.844	138.912	190.627	1.05534	0.0777044	7.42329	0.0438736	0.834089	0.926105	Rv0298	Rv0298	hypothetical protein
MT0313	49.2032	54.5423	46.0336	60.5987	1.02777	0.0395171	5.86075	0.016738	0.897061	0.953456
MT0314	98.3483	93.4911	105.165	106.17	1.10157	0.139566	6.69686	0.222963	0.636791	0.83871	Rv0301	Rv0301	conserved hypothetical protein
MT0315	34.9128	47.7505	53.8837	69.9178	1.498	0.58304	5.7555	3.11335	0.077653	0.295678	Rv0302	Rv0302	transcriptional regulator (TetR/AcrR family)
MT0316	22.8879	19.3358	24.4887	32.8853	1.35769	0.44115	4.81487	1.84592	0.174258	0.453845
MT0318	414.596	455.535	325.563	284.453	0.701083	-0.512342	8.44462	2.3959	0.121654	0.379513	Rv0304c	PPE	PPE-family protein
MT0319	13.1286	12.9599	12.8843	14.5398	1.05075	0.0714193	3.77678	0.0598742	0.806695	0.918549
MT0320	30.1493	16.7023	17.7479	22.5903	0.859972	-0.217638	4.91994	0.318806	0.572326	0.799696	Rv0307c	Rv0307c	hypothetical protein
MT0321	222.838	404.666	222.148	344.173	0.902535	-0.147945	8.1934	0.145194	0.703171	0.871951	Rv0308	Rv0308	conserved hypothetical protein
MT0322	402.746	638.013	327.014	402.137	0.700613	-0.513311	8.90561	1.5394	0.214708	0.49621	Rv0309	Rv0309	hypothetical protein
MT0323	25.6182	33.6125	33.832	33.178	1.13196	0.178821	4.89593	0.333861	0.563394	0.796683	Rv0310c	Rv0310c	conserved hypothetical protein
MT0324	301.551	104.996	116.983	75.6752	0.473884	-1.07739	7.33321	3.57184	0.0587671	0.254262	Rv0311	Rv0311	hypothetical protein
MT0325	27.7095	12.544	11.7751	9.41671	0.526347	-0.925914	4.32618	2.69844	0.100446	0.339837
MT0326	256.995	384.776	347.791	450.197	1.24344	0.314339	8.38374	0.488506	0.484594	0.741385	Rv0312	Rv0312	conserved hypothetical protein
MT0327	402.455	341.253	355.726	318.07	0.905985	-0.142442	8.35271	0.179528	0.671779	0.857179	Rv0313	Rv0313	hypothetical protein
MT0328	66.5724	39.7805	26.4086	28.982	0.520551	-0.941889	5.67477	8.19687	0.00419628	0.0492384
MT0328.1	32.8796	35.2758	38.6102	32.0558	1.03718	0.0526606	5.03723	0.0319476	0.858143	0.933761
MT0328.2	71.4521	40.6122	38.6102	38.6915	0.689452	-0.536477	6.07644	2.74428	0.0976033	0.335144
MT0329	158.356	289.136	235.458	311.678	1.22275	0.290131	7.9001	0.491577	0.483225	0.740814	Rv0315	Rv0315	probable [beta]-1,3-glucanase
MT0330	25.7344	28.7612	32.1681	48.4009	1.47825	0.563893	5.25194	2.22789	0.135538	0.398506
MT0332	133.087	90.0259	76.0259	66.3561	0.638104	-0.648137	6.5482	3.60906	0.0574657	0.249769	Rv0317c	glpQ2	glycerophosphoryl diester phosphodiesterase
MT0333	10.9792	18.9893	17.108	19.0286	1.20758	0.272116	3.99208	0.606869	0.435969	0.706833
MT0334	13.8257	16.2171	11.0498	11.4659	0.749997	-0.415044	3.88698	1.96778	0.160683	0.434957
MT0335	5.80911	6.7918	2.85844	1.85407	0.376705	-1.40849	2.16061	16.1486	5.85611e-05	0.00259621	Rv0320	Rv0320	conserved hypothetical protein
MT0336	117.518	152.607	154.1	139.25	1.08609	0.119144	6.99994	0.116267	0.733119	0.882663
MT0337	24.3983	40.4043	42.0233	43.473	1.3202	0.400757	5.04948	1.30876	0.252619	0.538154	Rv0322	udgA	UDP-glucose dehydrogenase/GDP-mannose
MT0338	19.112	20.514	24.446	20.1508	1.12604	0.171263	4.29777	0.343623	0.557745	0.79337	Rv0323c	Rv0323c	conserved hypothetical protein
MT0339	13.1286	11.0193	10.6231	10.0022	0.853716	-0.228172	3.66066	0.454455	0.500227	0.751754	Rv0324	Rv0324	putative transcriptional regulator
MT0340	7.60994	7.55414	9.00195	8.39209	1.1472	0.198117	3.06227	0.427503	0.513217	0.762581	Rv0325	Rv0325	hypothetical protein
MT0341	9.35267	10.4649	9.08727	8.14814	0.870689	-0.19977	3.21241	0.391764	0.531373	0.776389	Rv0326	Rv0326	hypothetical protein
MT0342	7.60994	11.4352	19.7957	16.5402	1.91247	0.93544	4.90771	8.69665	0.00318795	0.0423218	Rv0327c	Rv0327c	cytochrome P-450 monooxygenasemonoxygenase
MT0343	32.0082	25.6425	28.6697	27.0303	0.965827	-0.0501635	5.24306	0.0238692	0.877218	0.943894	Rv0328	Rv0328	transcriptional regulator (TetR/AcrR family)
MT0344	3.9502	4.08894	7.12476	7.02594	1.75985	0.815452	2.42703	5.61009	0.0178574	0.122016	Rv0329c	Rv0329c	conserved hypothetical protein
MT0345	6.09957	2.77216	8.02069	7.07473	1.68919	0.756331	2.56518	4.47897	0.0343145	0.180915
MT0346	19.6929	17.5339	20.7343	24.9323	1.22582	0.293743	4.38581	0.935189	0.333518	0.618154	Rv0331	Rv0331	putative dehydrogenase
MT0348	106.539	114.629	97.7415	104.852	0.91604	-0.126517	6.60759	0.185202	0.66694	0.854283	Rv0334	rmlA	glucose-1-phosphate thymidyltransferase
MT0349	8.48131	4.71267	3.24241	3.07385	0.47825	-1.06416	2.95088	4.86424	0.0274189	0.156408	Rv0335c	PE	PE-family protein
MT0350	333.792	290.661	202.181	368.569	0.913965	-0.129788	8.37543	0.0744985	0.784896	0.910918	Rv0336	Rv0336	conserved hypothetical protein
MT0351	538.156	515.553	495.918	452.49	0.900068	-0.151894	8.86529	0.198171	0.656201	0.849047	Rv0337c	aspC	aspartate aminotransferase
MT0352	1876.87	1601.75	1343.3	991.926	0.671309	-0.574952	10.393	1.79765	0.179997	0.460081	Rv0338c	Rv0338c	conserved hypothetical protein
MT0353	159.518	126.272	151.284	100.217	0.880031	-0.184373	7.00223	0.285086	0.593387	0.812558	Rv0339c	Rv0339c	conserved hypothetical protein
MT0355	77.8421	53.2948	40.1461	39.6673	0.608488	-0.716699	5.80002	4.51678	0.033564	0.178182	Rv0340	Rv0340	hypothetical protein
MT0356	1454.25	581.669	275.477	139.689	0.20393	-2.29386	8.88611	21.4983	3.54139e-06	0.000277061	Rv0341	Rv0341	conserved hypothetical protein
MT0357	749.376	457.337	297.022	173.111	0.38961	-1.3599	8.37126	11.7326	0.000614141	0.0138442	Rv0342	Rv0342	conserved hypothetical protein
MT0357.1	257.692	171.181	210.671	119.49	0.769838	-0.377373	7.43578	0.90552	0.341306	0.624111	Rv0343	Rv0343	conserved hypothetical protein
MT0359	105.145	123.361	114.295	122.076	1.03448	0.0489012	6.56432	0.0225756	0.880566	0.944718	Rv0344c	lpqJ	lipoprotein
MT0360	35.2613	23.0089	26.3659	26.2985	0.903122	-0.147007	4.98201	0.198877	0.655629	0.849047	Rv0345	Rv0345	unknown possible membrane protein
MT0361	359.584	630.251	592.721	741.968	1.34843	0.431281	8.99335	1.00194	0.316841	0.602542	Rv0346c	aroP2	probable aromatic amino acid permease
MT0362	327.866	457.753	385.334	354.664	0.941969	-0.0862486	8.38671	0.0543967	0.815582	0.92105	Rv0347	Rv0347	conserved hypothetical protein
MT0363	119.319	152.469	126.411	139.884	0.97986	-0.029352	7.0393	0.00740409	0.931429	0.972192
MT0364	79.1201	105.481	89.7208	92.313	0.986276	-0.0199359	6.48275	0.00429503	0.947747	0.977892	Rv0349	Rv0349	hypothetical protein
MT0365	2589.47	4216.73	1889.26	2643.46	0.66597	-0.586471	11.4013	1.42741	0.232187	0.51677	Rv0350	dnaK	70 kD heat shock protein, chromosome replication
MT0366	934.57	1081.77	490.713	557.196	0.519712	-0.944215	9.43902	5.45728	0.0194869	0.127883	Rv0351	grpE	stimulates DnaK ATPase activity
MT0367	636.214	716.396	416.564	545.145	0.711001	-0.492077	9.1418	1.81359	0.178078	0.458111	Rv0352	dnaJ	acts with GrpE to stimulate DnaK ATPase
MT0368	185.136	195.368	127.008	137.786	0.695913	-0.523022	7.26573	2.81376	0.093459	0.328165	Rv0353	hspR	heat shock regulator
MT0369	22.6555	18.5042	21.2463	19.6629	0.99343	-0.00950928	4.48227	0.000994071	0.974848	0.988705	Rv0354c	PPE	PPE-family protein
MT0370	612.048	548.126	471.472	402.625	0.753422	-0.40847	8.99004	1.3778	0.240475	0.52598
MT0372	46.6472	60.3638	47.8682	54.1583	0.953628	-0.0685013	5.62016	0.0494875	0.823958	0.923468	Rv0356c	Rv0356c	hypothetical protein
MT0373	136.572	162.726	123.766	135.932	0.867737	-0.20467	6.95488	0.428661	0.512646	0.762581	Rv0357c	purA	adenylosuccinate synthase
MT0374	17.6016	23.6327	20.4784	20.1508	0.986189	-0.0200639	4.34175	0.00415178	0.948624	0.978182	Rv0358	Rv0358	hypothetical protein
MT0375	10.1659	12.7519	13.1829	18.2967	1.37399	0.458374	3.85668	2.10366	0.146947	0.417606	Rv0359	Rv0359	conserved hypothetical protein
MT0376	21.3775	17.7418	10.6658	15.6132	0.670989	-0.575639	4.0203	2.9432	0.0862397	0.314818
MT0377	304.049	300.086	288.788	309.532	0.990364	-0.0139699	8.42277	0.00182681	0.965908	0.987185
MT0378	17.6597	23.9792	25.214	26.2009	1.23576	0.305393	4.57536	0.996284	0.318211	0.602879	Rv0362	mgtE	putative magnesium ion transporter
MT0379	370.854	402.864	251.073	273.231	0.677649	-0.56139	8.43088	2.91705	0.0876477	0.317057	Rv0363c	fba	fructose bisphosphate aldolase
MT0380	129.659	174.646	190.235	212.583	1.32383	0.404716	7.43299	1.42313	0.232889	0.516811	Rv0364	Rv0364	conserved hypothetical protein
MT0381	77.9002	51.3543	39.7621	39.8137	0.615508	-0.70015	5.8937	3.83058	0.0503254	0.23186	Rv0365c	Rv0365c	conserved hypothetical protein
MT0382	8.82985	11.2273	10.8791	9.90462	1.03739	0.0529636	3.65338	0.0193292	0.889427	0.949308	Rv0366c	Rv0366c	conserved hypothetical protein
MT0384	3.54356	2.56425	4.77828	6.24528	1.79137	0.841061	2.05766	6.5389	0.010554	0.0897881	Rv0368c	Rv0368c	conserved hypothetical protein
MT0384.1	23.3526	18.92	34.1733	25.5666	1.41269	0.498443	4.43124	2.71103	0.0996565	0.339837	Rv0369c	Rv0369c	putative CO dehydrogenase gene cluster
MT0385	11.5601	14.9697	67.4079	43.6194	4.18854	2.06645	4.6766	35.5752	2.45388e-09	6.99355e-07	Rv0370c	Rv0370c	putative CO dehydrogenase gene cluster
MT0388	19.0539	17.0488	23.4648	23.8589	1.31012	0.389699	4.31188	1.79826	0.179922	0.460081	Rv0373c	Rv0373c	putative CO dehydrogenase gene cluster
MT0389	2.32365	1.94051	2.34648	2.09802	1.0399	0.0564499	1.14033	0.0248961	0.874626	0.943182	Rv0374c	Rv0374c	putative CO dehydrogenase gene cluster
MT0390	6.73857	4.15824	6.6128	6.73319	1.21868	0.285323	2.61123	0.797803	0.371751	0.651982	Rv0375c	Rv0375c	putative CO dehydrogenase gene cluster
MT0391	58.672	25.4346	48.7641	36.1055	1.00862	0.0123779	5.4665	0.00079421	0.977517	0.988705	Rv0377	Rv0377	transcriptional regulator (LysR family)
MT0392	4.12447	3.53451	3.79703	4.63517	1.09748	0.1342	2.18109	0.143025	0.705292	0.872864
MT0393	9.46885	6.44528	10.2392	8.48968	1.17466	0.232242	3.28722	0.466383	0.494656	0.74681	Rv0380c	Rv0380c	some similarity with methyltransferases
MT0394	13.5352	10.7421	16.8093	15.7108	1.33791	0.419979	3.83559	2.03194	0.154024	0.426266	Rv0381c	Rv0381c	hypothetical protein
MT0395	47.9833	48.998	50.1293	60.5011	1.14061	0.189808	5.83597	0.417889	0.517992	0.764345	Rv0382c	umpA	probable uridine 5'-monophosphate synthase
MT0396	455.841	480.416	323.131	312.459	0.678874	-0.558785	8.57812	2.75932	0.0966896	0.334762	Rv0383c	Rv0383c	unknown possible membrane protein
MT0397	286.68	368.351	318.353	396.77	1.09176	0.126655	8.47383	0.122109	0.726758	0.880578	Rv0384c	clpB	heat shock protein
MT0398	46.8795	30.7017	81.2308	63.2822	1.86175	0.896657	5.62254	7.07552	0.00781441	0.0745921	Rv0385	Rv0385	similar to oxidoreductases
MT0399	254.149	188.438	51.0252	49.5231	0.227193	-2.13801	7.36111	36.6964	1.38037e-09	4.58974e-07	Rv0386	Rv0386	transcriptional regulator (LuxR/UhpA family)
MT0400	40.2572	24.7415	34.3439	20.9314	0.850223	-0.234087	5.03615	0.467972	0.493921	0.746299	Rv0387c	Rv0387c	conserved hypothetical protein
MT0401	56.755	31.9492	42.7912	26.3473	0.779308	-0.359734	5.4358	0.84229	0.358743	0.642737	Rv0389	purT	phosphoribosylglycinamide formyltransferase II
MT0401.1	73.5434	85.6598	63.9095	55.7196	0.751599	-0.411966	6.25647	1.89111	0.169076	0.445879
MT0402	74.589	75.4028	56.4008	51.3772	0.718639	-0.47666	6.12514	2.82049	0.0930681	0.328038	Rv0391	metZ	o-succinylhomoserine sulfhydrylase
MT0403	172.647	194.606	106.701	112.22	0.596132	-0.746296	7.04001	5.91332	0.0150268	0.110988	Rv0392c	Rv0392c	possible dehydrogenasedehydrogemase
MT0404	2.67219	1.87121	2.68778	2.7811	1.19504	0.257064	1.27266	0.522564	0.46975	0.733582	Rv0393	Rv0393	conserved hypothetical protein
MT0404.1	86.6139	103.679	87.8436	78.7979	0.875876	-0.191201	6.37538	0.432538	0.510746	0.762581	Rv0394c	Rv0394c	hypothetical protein
MT0407	11.7344	14.0687	9.68456	11.3684	0.816281	-0.292863	3.61057	0.925691	0.335985	0.619778
MT0407.1	64.3069	80.7392	150.559	190.432	2.35115	1.23336	6.60804	15.9356	6.5535e-05	0.00276425
MT0408	16.2655	10.8114	7.80737	10.0022	0.65662	-0.60687	3.83766	2.72021	0.0990853	0.338775	Rv0398c	Rv0398c	hypothetical protein
MT0409	159.634	114.975	60.0699	60.5987	0.439386	-1.18644	6.72184	12.6123	0.000383209	0.0100592	Rv0399c	lpqK	possible PBP
MT0410	211.336	94.3228	56.4008	58.7447	0.37667	-1.40863	7.03138	10.9948	0.000913663	0.0178702	Rv0400c	fadE7	acyl-CoA dehydrogenase
MT0411	5.9253	4.43546	5.41823	7.41627	1.23317	0.302373	2.79117	0.837998	0.35997	0.642737	Rv0401	Rv0401	probable membrane protein
MT0412	62.8546	76.3037	159.646	124.857	2.04484	1.03199	6.44736	11.2491	0.000796601	0.0161145	Rv0402c	mmpL1	conserved large membrane protein
MT0413	23.2365	19.9596	22.8248	17.2233	0.927188	-0.109066	4.32455	0.12707	0.721489	0.879381
MT0414	8.65558	7.41553	7.72205	7.70902	0.959034	-0.0603465	2.91191	0.0410699	0.839403	0.928572
MT0415	8.19085	12.4054	13.4389	14.9301	1.37953	0.464181	3.42801	1.83055	0.176063	0.457054	Rv0403c	mmpS1	conserved small membrane protein
MT0417	87.0786	150.043	134.987	141.055	1.16433	0.219498	6.70259	0.331539	0.564754	0.797035
MT0418	132.68	164.805	186.31	169.403	1.19585	0.258039	7.13919	0.683304	0.408451	0.684847	Rv0405	pks6	polyketide synthase
MT0419	64.4812	38.9489	54.8649	51.6211	1.02908	0.0413506	5.71787	0.0149731	0.90261	0.955371
MT0420	199.95	181.784	176.541	186.919	0.952098	-0.0708178	7.51156	0.0422567	0.837131	0.927705	Rv0407	Rv0407	probable coenzyme F420-dependent enzyme
MT0421	257.053	195.715	197.019	163.987	0.797312	-0.326784	7.691	0.907029	0.340904	0.623662	Rv0408	pta	phosphate acetyltransferase
MT0422	110.257	80.8778	99.2774	78.7979	0.931583	-0.102244	6.53898	0.102216	0.749187	0.891969	Rv0409	ackA	acetate kinase
MT0423	1831.44	1234.1	818.537	435.071	0.408941	-1.29003	9.83051	6.71972	0.00953525	0.0843585	Rv0410c	pknG	serine-threonine protein kinase
MT0424	934.454	577.233	412.212	218.731	0.417387	-1.26054	8.85646	7.06399	0.00786487	0.0748946	Rv0411c	glnH	putative glutamine binding protein
MT0425	1464.3	893.468	549.417	299.139	0.359904	-1.47432	9.35781	7.98537	0.00471568	0.0531513	Rv0412c	Rv0412c	unknown probable membrane protein
MT0426	75.867	42.5527	40.3594	43.1802	0.705131	-0.504037	6.0288	2.09808	0.147485	0.417685	Rv0413	mutT3	MutT homologue
MT0427	15.8008	8.73231	7.21009	7.36748	0.593121	-0.753601	3.63369	4.2832	0.0384908	0.191973	Rv0414c	thiE	thiamine synthesis, thiazole moiety
MT0428	91.7259	70.205	73.5941	79.8713	0.947485	-0.0778254	6.21949	0.0683398	0.79377	0.913094	Rv0415	Rv0415	conserved hypothetical protein
MT0429	6.85475	5.40571	4.86361	6.1477	0.895383	-0.159423	2.53475	0.225261	0.63506	0.83871	Rv0416	Rv0416	conserved hypothetical protein
MT0430	48.6223	37.0777	35.3678	46.2053	0.951254	-0.0720968	5.28901	0.0570084	0.811288	0.919353	Rv0417	thiG	thiamine synthesis, thiazole moiety
MT0431	1.10373	1.59399	2.00517	2.7811	1.77931	0.831317	1.0683	4.16834	0.0411861	0.201388
MT0432	289.236	322.194	341.007	332.22	1.10109	0.138934	8.18809	0.186204	0.666095	0.853896	Rv0418	lpqL	probable aminopeptidase Y
MT0433	289.236	281.652	328.294	306.311	1.11161	0.152652	8.19174	0.222629	0.637044	0.83871	Rv0419	lpqM	possible zinc metallopeptidase
MT0434	57.7426	115.322	182.897	153.4	1.94378	0.958863	6.66286	6.33499	0.0118379	0.0962199
MT0435	21.9584	15.6627	21.417	20.5411	1.11406	0.155832	4.46988	0.267898	0.604746	0.821844	Rv0421c	Rv0421c	hypothetical protein
MT0436	75.9251	85.6598	93.5178	113.684	1.28232	0.358758	6.63398	1.35703	0.244052	0.528647	Rv0422c	thiD	phosphomethylpyrimidine kinase
MT0437	1043.96	1245.6	1012.7	1135.66	0.938335	-0.0918255	10.1213	0.053997	0.816249	0.92105
MT0438	119.668	148.172	190.833	165.646	1.33107	0.412583	7.29997	1.52438	0.216957	0.498652
MT0440	701.741	457.615	712.476	554.317	1.09265	0.127827	9.37584	0.114355	0.735239	0.883616	Rv0425c	ctpH	C-terminal region putative cation-transporting
MT0441	176.539	166.26	167.667	193.994	1.05497	0.0772068	7.58946	0.0559061	0.813088	0.920385	Rv0426c	Rv0426c	hypothetical protein
MT0442	84.4645	75.2642	71.7169	86.2629	0.988867	-0.0161522	6.38955	0.00308624	0.955697	0.980881	Rv0427c	xthA	exodeoxyribonuclease III
MT0443	85.394	70.8287	92.0246	79.8713	1.10021	0.137779	6.21303	0.215626	0.642393	0.841258	Rv0428c	Rv0428c	hypothetical protein
MT0444	53.7343	77.3433	85.5825	88.7513	1.33038	0.411836	6.02834	1.68122	0.194762	0.47675	Rv0429c	def	polypeptide deformylase
MT0445	268.207	356.639	441.565	399.844	1.34665	0.429378	8.24469	1.62694	0.202127	0.483741	Rv0430	Rv0430	hypothetical protein
MT0446	183.278	184.557	173.383	171.404	0.93735	-0.0933403	7.44029	0.0868774	0.768185	0.90081	Rv0431	Rv0431	tuberculin related peptide (AT103)
MT0447	213.775	196.408	214.383	243.859	1.11712	0.159779	7.86123	0.240228	0.624041	0.834465	Rv0432	sodC	superoxide dismutase precursor (Cu-Zn)
MT0448	231.203	275.206	230.979	262.058	0.973614	-0.0385777	8.01497	0.0129724	0.90932	0.95857	Rv0433	Rv0433	conserved hypothetical protein
MT0449	39.9086	43.7308	47.7402	58.0616	1.26495	0.339077	5.60621	1.35315	0.244728	0.528973
MT0450	2.49792	2.07912	4.5223	4.14726	1.88722	0.916264	1.78992	5.97578	0.0145037	0.109188
MT0451	138.896	96.8177	121.548	118.172	1.01684	0.0240973	7.03267	0.00515782	0.942747	0.975508	Rv0435c	Rv0435c	ATPase of AAA-family
MT0452	129.195	164.666	178.503	158.523	1.14702	0.19789	7.18657	0.397905	0.528173	0.774214	Rv0436c	pssA	CDP-diacylglycerol-serine o-phosphatidyltransferase
MT0453	41.4771	30.4938	40.6581	38.7402	1.10265	0.140981	5.45037	0.210829	0.646119	0.843039	Rv0437c	psd	putative phosphatidylserine decarboxylase
MT0454	84.3483	67.2249	78.671	74.1139	1.00784	0.0112613	6.25875	0.00133212	0.970885	0.988705	Rv0438c	moaA3	molybdenum cofactor biosynthesis, protein A
MT0455	103.809	103.332	89.5502	110.024	0.963401	-0.053792	6.69572	0.0316231	0.858857	0.933761	Rv0439c	Rv0439c	Probable oxidoreductase
MT0456	5394.57	5846.28	5384.78	6128.91	1.02427	0.0345993	12.263	0.00537192	0.941573	0.975508	Rv0440	groEL2	60 kD chaperonin 2
MT0457	102.763	55.0967	54.9076	43.9121	0.625912	-0.675968	6.17264	2.70904	0.0997807	0.339837	Rv0441c	Rv0441c	65 kDa antigen
MT0458	77.7259	65.423	57.4247	47.3275	0.731777	-0.450525	5.961	2.11707	0.145665	0.415146	Rv0442c	PPE	PPE-family protein
MT0459	153.651	109.362	77.5618	76.1143	0.584249	-0.775345	6.93524	4.45313	0.0348374	0.181464	Rv0443	Rv0443	hypothetical protein
MT0460	218.539	139.648	149.961	137.445	0.802314	-0.317761	7.46087	0.866542	0.351914	0.635644	Rv0444c	Rv0444c	conserved hypothetical protein
MT0461	142.788	112.619	125.217	111.342	0.926132	-0.11071	6.98873	0.125123	0.723543	0.879381	Rv0445c	sigK	ECF-type sigma factor
MT0462	42.1161	52.0473	43.0899	44.5464	0.93094	-0.103239	5.56242	0.120336	0.72867	0.880619	Rv0446c	Rv0446c	conserved hypothetical protein
MT0463	62.8546	69.3733	72.9115	69.4787	1.07698	0.106987	6.07165	0.126923	0.721644	0.879381	Rv0447c	ufaA1	unknown fatty acid methyltransferase
MT0465	15.5684	22.3159	25.8966	34.349	1.59109	0.670012	4.97796	3.69125	0.0546985	0.241959	Rv0449c	Rv0449c	putative dehydrogenase
MT0466	450.497	791.729	568.488	706.985	1.02678	0.0381331	9.56872	0.00717133	0.932513	0.972485	Rv0450c	mmpL4	conserved large membrane protein
MT0467	95.3856	161.617	123.211	135.835	1.00807	0.0115961	7.2421	0.000755411	0.978073	0.988705
MT0468	40.3152	48.79	56.6995	48.4985	1.18104	0.240059	6.25919	0.659318	0.416801	0.691491	Rv0452	Rv0452	putative transcriptional regulator
MT0469	16.9626	16.2864	20.6917	18.9798	1.19309	0.254703	4.51073	0.726634	0.393976	0.672643	Rv0453	PPE	PPE-family protein
MT0470	278.896	300.849	239	230.002	0.809	-0.305789	8.00595	0.89649	0.343724	0.62681
MT0471	1119.59	969.91	739.098	660.926	0.670029	-0.577705	9.82161	2.19327	0.138615	0.403115	Rv0455c	Rv0455c	hypothetical protein
MT0472	33.1119	35.2758	22.3982	20.8827	0.633098	-0.6595	4.99571	5.06032	0.0244798	0.145783	Rv0456c	echA2	enoyl-CoA hydratase/isomerase superfamily
MT0472.1	4.5892	3.32659	4.5223	2.7811	0.922555	-0.116293	1.77681	0.110431	0.739654	0.884923
MT0473	204.829	166.953	138.826	112.805	0.676828	-0.56314	7.42059	2.93046	0.0869225	0.315784	Rv0457c	Rv0457c	probable peptidase
MT0474	144.473	123.153	97.7842	112.659	0.786248	-0.346944	6.67569	1.29854	0.25448	0.538982
MT0475	19.6348	15.732	12.9696	15.418	0.801824	-0.318642	3.8338	1.0318	0.309737	0.596836	Rv0459	Rv0459	conserved hypothetical protein
MT0476	61.3442	54.473	45.2657	51.7675	0.83763	-0.255615	5.75448	0.752946	0.385545	0.664216
MT0477	168.058	152.746	126.326	109.292	0.734476	-0.445213	7.04966	1.95061	0.162521	0.436967	Rv0461	Rv0461	unknown possible membrane protein
MT0478	999.865	898.873	645.239	552.512	0.630817	-0.664706	9.56072	3.05335	0.0805707	0.303854	Rv0462	Rv0462	probable dihydrolipoamide dehydrogenase
MT0479	25.8506	24.0485	18.4305	20.8827	0.78759	-0.344483	4.65115	1.28324	0.257298	0.542038
MT0480	165.908	243.049	195.611	228.148	1.03625	0.0513742	7.81987	0.018043	0.893146	0.950561	Rv0464c	Rv0464c	conserved hypothetical protein
MT0481	200.763	282.067	290.195	320.071	1.26399	0.337988	8.20465	0.819245	0.365401	0.647224	Rv0465c	Rv0465c	transcriptional regulator (PbsX/Xre family)
MT0482	115.253	153.924	131.019	170.818	1.1214	0.1653	7.22612	0.258435	0.611197	0.825994	Rv0466	Rv0466	conserved hypothetical protein
MT0483	251.128	330.303	130.166	276.793	0.699917	-0.514745	10.1978	0.962828	0.326475	0.611854	Rv0467	aceA	isocitrate lyase
MT0484	63.4355	94.2535	64.8908	102.315	1.06042	0.084632	7.5848	0.0394131	0.842633	0.929618
MT0486	899.193	1191.41	860.859	896.637	0.840675	-0.25038	9.97827	0.409404	0.522272	0.769522	Rv0470c	umaA2	unknown mycolic acid methyltransferase
MT0487	3.07883	3.04938	3.41306	4.19605	1.23924	0.309455	2.04471	0.738702	0.390077	0.669422
MT0488	54.4314	44.2853	55.0783	43.7657	1.00119	0.00171835	5.70802	3.08301e-05	0.99557	0.997319	Rv0471c	Rv0471c	hypothetical protein
MT0489	365.219	305.146	247.788	208.143	0.680127	-0.556124	8.15283	2.56269	0.109413	0.356082	Rv0472c	Rv0472c	transcriptional regulator (TetR/AcrR family)
MT0490	357.609	255.94	259.435	181.65	0.718908	-0.476122	8.0341	1.53013	0.216093	0.496952	Rv0473	Rv0473	possible membrane protein
MT0491	40.141	52.3938	51.9638	49.1328	1.09291	0.128179	6.30225	0.163676	0.685794	0.862773	Rv0474	Rv0474	transcriptional regulator (PbsX/Xre family)
MT0493	576.496	1019.12	995.12	1154.3	1.3471	0.429854	11.332	0.622971	0.429945	0.701767	Rv0475	Rv0475	possible exported protein
MT0495	184.207	152.954	154.996	137.347	0.867052	-0.20581	7.44654	0.328248	0.566693	0.797314	Rv0476	Rv0476	unknownunkown hydrophobic protein
MT0496	39.7343	37.7014	43.8152	34.0563	1.00576	0.0082923	5.49345	0.00074258	0.97826	0.988705	Rv0478	deoC	deoxyribose-phosphate aldolase
MT0497	718.529	983.424	820.798	828.134	0.96886	-0.0456399	9.75778	0.0134068	0.907821	0.95857	Rv0479c	Rv0479c	unknown hydrophobic protein
MT0498	97.7093	93.9763	110.199	107.341	1.13485	0.182502	6.85508	0.366515	0.54491	0.784907
MT0499	62.6803	80.8778	74.4474	150.082	1.56399	0.645235	6.55419	2.34827	0.125422	0.385026
MT0500	23.9335	31.3254	34.7705	48.157	1.50096	0.585886	5.22954	2.69287	0.100798	0.339837	Rv0482	murB	UDP-N-acetylenolpyruvoylglucosamine reductase
MT0501	1341.96	1324.33	1440.06	1627.87	1.15063	0.202424	10.6695	0.249748	0.617252	0.829665	Rv0483	Rv0483	conserved hypothetical protein
MT0502	47.7509	35.0678	42.194	38.5451	0.974512	-0.0372487	5.70271	0.0151579	0.902014	0.955371	Rv0484c	Rv0484c	oxidoreductase
MT0503	1990.84	1290.37	1930.55	1038.62	0.904901	-0.144169	10.725	0.0891196	0.765299	0.90081	Rv0485	Rv0485	transcriptional regulator (ROK family)
MT0504	331.584	204.516	170.738	127.248	0.555836	-0.847269	8.09043	4.34684	0.0370778	0.187029	Rv0486	Rv0486	conserved hypothetical protein
MT0505	70.9874	59.047	40.6154	32.9341	0.565665	-0.82198	5.9142	6.26145	0.0123393	0.0984677	Rv0487	Rv0487	conserved hypothetical protein
MT0506	9.75931	9.56396	9.81255	7.31869	0.887259	-0.172573	3.39043	0.216982	0.641349	0.840941
MT0507	4.06638	5.1978	4.22366	4.09846	0.901423	-0.149724	2.3187	0.229796	0.631675	0.837059	Rv0488	Rv0488	probable membrane protein
MT0508	98.6968	81.0857	51.9212	52.2554	0.579414	-0.787334	6.37888	5.93968	0.0148037	0.1102	Rv0489	gpm	phosphoglycerate mutase I
MT0509	2183.47	1461.41	1060.57	573.151	0.448226	-1.1577	10.3017	6.24318	0.0124672	0.0988952
MT0510	289.178	274.097	189.339	153.448	0.608584	-0.716471	7.81323	4.06108	0.0438825	0.211208	Rv0491	regX3	two-component response regulator
MT0511	19.9253	19.0586	14.2495	19.3701	0.861762	-0.214639	4.49468	0.509322	0.475432	0.735305	Rv0492c	Rv0492c	gmc-type oxidoreductase
MT0512	5.57675	5.89084	3.75437	8.73363	1.08607	0.119116	3.0358	0.100527	0.751198	0.893108
MT0513	22.8879	20.7219	13.2256	20.7851	0.779095	-0.360129	4.53162	1.2872	0.256565	0.541351	Rv0493c	Rv0493c	conserved hypothetical protein
MT0514	1.39419	1.59399	2.00517	1.80528	1.28002	0.356166	0.998485	0.911243	0.339785	0.623329	Rv0494	Rv0494	transcriptional regulator (GntR family)
MT0515	551.052	293.572	194.416	147.984	0.405388	-1.30262	8.19513	9.59602	0.00195	0.0301569	Rv0495c	Rv0495c	conserved hypothetical protein
MT0516	261.759	232.307	255.084	245.81	1.0138	0.0197698	7.88395	0.00363852	0.951901	0.979898	Rv0496	Rv0496	conserved hypothetical protein
MT0517	178.398	184.279	161.139	182.918	0.948649	-0.0760534	7.41277	0.0586196	0.808691	0.91902	Rv0497	Rv0497	probable membrane protein
MT0518	35.7841	36.1767	48.2948	45.6686	1.30579	0.384926	5.37848	1.78726	0.18126	0.460949
MT0519	22.6555	19.4051	28.3711	28.0062	1.33967	0.421882	4.7066	1.97254	0.160179	0.434957	Rv0499	Rv0499	hypothetical protein
MT0520	88.8213	96.194	87.2037	92.3618	0.970579	-0.043082	6.57895	0.0215723	0.883231	0.946023	Rv0500	proC	pyrroline-5-carboxylate reductase
MT0521	80.1658	121.351	99.1494	118.904	1.08223	0.114003	6.73334	0.112657	0.737139	0.884015
MT0522	325.02	457.892	484.271	582.519	1.36263	0.446394	8.772	1.60025	0.205868	0.486014	Rv0501	galE1	UDP-glucose 4-epimerase
MT0523	471.584	553.393	572.157	594.668	1.1384	0.187014	9.02956	0.286387	0.592545	0.81231	Rv0502	Rv0502	conserved hypothetical protein
MT0524	676.181	883.072	630.605	697.178	0.85156	-0.23182	9.54598	0.318068	0.572771	0.799696
MT0525	10.4564	8.03927	6.2715	6.19649	0.673213	-0.570864	3.06122	3.36295	0.0666786	0.270704
MT0526	579.343	520.82	319.974	290.357	0.554769	-0.850041	8.69025	6.19825	0.0127876	0.100714	Rv0505c	serB	probable phosphoserine phosphatase
MT0527	120.307	165.914	111.138	121.539	0.813013	-0.29865	6.96131	0.800043	0.371081	0.651982	Rv0506	mmpS2	conserved small membrane protein
MT0528	231.667	282.622	180.764	167.061	0.676368	-0.564119	7.79775	2.99331	0.0836093	0.309175	Rv0507	mmpL2	conserved large membrane protein
MT0529	9.87549	9.49465	7.46607	7.51385	0.773281	-0.370934	3.45934	1.44802	0.228847	0.5124
MT0530	431.791	438.487	439.986	522.749	1.10623	0.14565	8.89961	0.178266	0.672867	0.857745	Rv0509	hemA	glutamyl-tRNA reductase
MT0531	223.244	265.088	224.579	232.295	0.935609	-0.0960229	8.13961	0.0700147	0.791315	0.913037	Rv0510	hemC	porphobilinogen deaminase
MT0532	375.733	357.886	273.471	301.481	0.783713	-0.351603	8.54591	0.953193	0.328908	0.614968	Rv0511	cysG	uroporphyrin-III c-methyltransferase
MT0533	158.879	155.31	133.835	131.248	0.843707	-0.245186	7.26264	0.568239	0.450959	0.718869	Rv0512	hemB	[delta]-aminolevulinic acid dehydratase
MT0534	129.485	155.588	113.868	97.4849	0.741508	-0.431465	6.8347	1.98018	0.159371	0.434957	Rv0513	Rv0513	probable membrane protein
MT0535	6.04148	3.95033	5.63155	5.36704	1.09695	0.133497	2.65981	0.136459	0.711827	0.876332	Rv0514	Rv0514	possible membrane protein
MT0536	328.796	308.819	213.53	376.717	0.925682	-0.111412	8.40651	0.057114	0.811117	0.919353
MT0537	267.8	443.546	405.983	605.694	1.42224	0.508166	9.0294	1.47981	0.223804	0.506511	Rv0516c	Rv0516c	conserved hypothetical protein
MT0538	52.2239	77.2047	76.7938	81.9205	1.22662	0.294688	6.20514	0.819509	0.365324	0.647224	Rv0517	Rv0517	possible acyltransferase
MT0539	49.8422	57.1065	57.766	68.4541	1.18025	0.239096	5.7536	0.634529	0.425699	0.699738	Rv0518	Rv0518	hypothetical protein
MT0540	37.5269	36.939	46.247	41.9605	1.18457	0.244363	5.41888	0.720111	0.396108	0.674098
MT0541	283.485	207.08	183.665	165.402	0.711537	-0.49099	7.9201	2.00302	0.156987	0.431092	Rv0519c	Rv0519c	conserved hypothetical protein
MT0542	13.4191	14.2766	23.5928	21.4194	1.62561	0.700983	4.03747	4.95624	0.0259966	0.151205	Rv0520	Rv0520	similar to methyltransferases
MT0543	3.9502	3.3959	5.29024	4.04967	1.27064	0.345553	1.79152	1.20298	0.272728	0.557186
MT0544	70.5807	65.8388	89.0382	92.9473	1.33389	0.415642	6.33291	1.58321	0.208299	0.488174	Rv0522	gabP	probable 4-amino butyrate transporter
MT0545	26.4896	23.6327	18.7718	19.858	0.770454	-0.376219	4.60684	1.61691	0.203523	0.484361	Rv0523c	Rv0523c	conserved hypothetical protein
MT0546	689.774	355.183	196.55	152.961	0.334477	-1.58002	8.63048	11.7002	0.000624935	0.0139268	Rv0524	hemL	glutamate-1-semialdehyde aminotransferase
MT0547	102.124	69.9971	33.576	33.0317	0.386943	-1.36981	6.32255	16.0923	6.03281e-05	0.00264516
MT0548	165.269	141.38	66.768	53.3288	0.391689	-1.35222	6.94052	17.1059	3.53519e-05	0.00174141	Rv0526	Rv0526	conserved hypothetical protein
MT0549	63.3774	40.2656	19.3265	20.0532	0.379854	-1.39648	5.56536	15.3334	9.01114e-05	0.00351969
MT0550	340.879	205.279	116.897	95.6308	0.389135	-1.36166	7.76449	12.3381	0.0004438	0.0109306	Rv0528	Rv0528	probable membrane protein
MT0551	100.265	77.274	58.3633	53.4264	0.629603	-0.667487	6.39841	4.97618	0.0256986	0.150348	Rv0529	ccsB	cytochrome c-type biogenesis protein
MT0552	575.799	473.208	682.569	620.185	1.24187	0.312518	9.11716	0.769428	0.380394	0.659614	Rv0530	Rv0530	conserved hypothetical protein
MT0553	76.5641	38.4637	56.8274	38.3499	0.82725	-0.273604	5.84613	0.433905	0.510079	0.762581
MT0554	16.4398	17.8804	23.2515	32.5925	1.62672	0.701968	4.49475	5.30108	0.0213123	0.135119	Rv0531	Rv0531	unknown, membrane protein.
MT0556	18.8796	16.4944	13.9509	16.4426	0.858539	-0.220045	4.12484	0.51264	0.473998	0.734733	Rv0532	PE_PGRS	PE_PGRS-family protein
MT0557	187.402	245.059	169.544	177.063	0.801522	-0.319186	7.599	0.798464	0.371553	0.651982	Rv0533c	fabH	[beta]-ketoacyl-ACP synthase III
MT0558	18.1244	19.7516	14.8895	27.2743	1.11259	0.153927	4.63922	0.19154	0.661638	0.851317	Rv0534c	menA	4-dihydroxy-2-naphthoate octaprenyltransferase
MT0559	20.3319	19.821	18.3452	23.5662	1.04323	0.0610632	4.43191	0.0428737	0.835963	0.927557	Rv0535	pnp	phosphorylase from Pnp/MtaP family 2
MT0560	10.6307	7.96996	5.67421	9.95341	0.837305	-0.256174	3.31878	0.576058	0.447862	0.71737	Rv0536	galE2	UDP-glucose 4-epimerase
MT0562	184.497	194.536	154.484	181.162	0.885521	-0.175401	7.79177	0.289473	0.590558	0.810291	Rv0537c	Rv0537c	unknown, possible membrane protein,
MT0563	133.203	119.134	76.3672	88.9952	0.655267	-0.609846	7.06447	3.82205	0.0505822	0.232515	Rv0538	Rv0538	possible transmembrane protein
MT0564	13.3029	14.138	8.95928	13.6128	0.821879	-0.283003	4.15284	0.818592	0.365592	0.647224
MT0565	7.26139	5.40571	4.47964	4.78154	0.729134	-0.455744	2.80878	2.04654	0.152552	0.42417	Rv0540	Rv0540	conserved hypothetical protein
MT0566	36.4812	28.1374	31.7415	29.7627	0.951379	-0.0719086	4.99591	0.0592589	0.807671	0.918645	Rv0541c	Rv0541c	unknown membrane protein
MT0567	41.7094	35.9688	64.5495	51.1332	1.48902	0.574368	5.66361	3.72162	0.0537121	0.239193	Rv0542c	menE	o-succinylbenzoic acid-CoA ligase
MT0569	12.6058	16.0785	22.3555	30.2994	1.83625	0.876759	4.34602	6.59232	0.0102419	0.088645
MT0570	437.484	542.443	720.838	696.056	1.44594	0.532009	9.23519	2.06019	0.151192	0.422742	Rv0545c	pitA	low-affinity inorganic phosphate transporter
MT0571	68.4894	53.9185	47.3989	47.7666	0.777267	-0.363517	5.84723	1.46651	0.225898	0.508939	Rv0546c	Rv0546c	conserved hypothetical protein
MT0572	70.5807	60.3638	55.1209	55.9636	0.848196	-0.23753	5.91482	0.676485	0.4108	0.685812	Rv0547c	Rv0547c	putative oxidoreductase
MT0573	337.509	241.594	309.223	279.183	1.01602	0.0229223	8.1218	0.00458513	0.946014	0.977115
MT0573.1	10.224	8.24718	17.6199	12.4906	1.62888	0.703877	3.50672	4.56268	0.0326759	0.175237
MT0574	49.726	22.801	32.4241	21.1266	0.73817	-0.437976	5.09907	0.861108	0.353429	0.636938
MT0575	15.7427	9.97978	14.7188	9.90462	0.956761	-0.0637699	3.76455	0.0228135	0.879943	0.944642
MT0577	103.693	78.1056	75.5566	55.3293	0.719952	-0.474027	6.30196	1.81784	0.17757	0.458036	Rv0551c	fadD8	acyl-CoA synthase
MT0578	76.7384	48.2356	91.9393	71.528	1.30761	0.386929	6.08372	1.30503	0.253297	0.538154	Rv0552	Rv0552	putative transcriptional regulator
MT0579	11.2116	7.69275	14.4202	14.0519	1.50273	0.587586	3.65754	3.24756	0.0715299	0.28202
MT0580	87.0786	107.906	99.5334	106.804	1.05834	0.0818015	6.55019	0.0720959	0.788309	0.912052
MT0581	120.132	105.55	103.842	120.319	0.993147	-0.00992135	6.90375	0.00104387	0.974226	0.988705	Rv0555	menD	2-succinyl-6-hydroxy-2,4-cyclohexadiene-1-carbox ylate
MT0582	46.9376	61.3341	72.0582	62.0625	1.23918	0.309386	5.73135	1.00711	0.315596	0.601351	Rv0556	Rv0556	possible membrane protein
MT0583	61.0538	99.2434	104.482	88.9952	1.2074	0.271905	6.38466	0.650844	0.419811	0.693601	Rv0557	Rv0557	conserved hypothetical protein
MT0584	221.385	128.836	90.7021	80.7983	0.489668	-1.03012	7.07696	6.55213	0.0104759	0.0893136
MT0585	588.696	468.079	361.742	374.375	0.696558	-0.521684	9.59504	1.99977	0.157323	0.431568	Rv0559c	Rv0559c	possible exported
MT0586	63.2032	65.2844	48.5934	53.0361	0.790974	-0.338298	9.93064	0.786262	0.375233	0.653921	Rv0560c	Rv0560c	methyl transferase
MT0587	59.95	39.0182	26.6645	28.1038	0.55316	-0.854231	5.44179	6.68521	0.00972161	0.0854388	Rv0561c	Rv0561c	similar to squalene monooxygenase
MT0588	170.381	160.37	148.681	174.429	0.976847	-0.0337948	7.43829	0.0115621	0.914371	0.962006	Rv0562	grcC1	heptaprenyl diphosphate synthase II
MT0589	216.506	371.47	212.634	199.117	0.700353	-0.513845	8.02294	2.00549	0.15673	0.430685	Rv0563	htpX	probable (transmembrane) heat shock protein
MT0590	66.9791	83.7886	70.2664	72.0647	0.944211	-0.0828187	6.15209	0.0741771	0.785349	0.911157	Rv0564c	gpdA1	glycerol-3-phosphate dehydrogenase
MT0591	120.191	152.954	134.389	150.521	1.04314	0.0609364	7.03894	0.0322397	0.857503	0.933761	Rv0565c	Rv0565c	Probable monooxygenasemonoxygenase
MT0592	24.0497	32.0878	18.5585	30.5433	0.874666	-0.193196	4.83337	0.322181	0.5703	0.7987	Rv0566c	Rv0566c	conserved hypothetical protein
MT0593	299.169	499.821	382.519	382.133	0.95707	-0.0633035	8.48091	0.0265926	0.870461	0.940976	Rv0567	Rv0567	Probable methyltransferase
MT0594	700.579	468.218	471.941	411.896	0.756181	-0.403197	9.05678	1.07525	0.299762	0.586587	Rv0568	Rv0568	similar too MTCY63.32c cytochrome P-450
MT0595	194.605	175.963	62.331	55.866	0.31899	-1.64842	6.50854	18.3904	1.79966e-05	0.00105598	Rv0569	Rv0569	conserved hypothetical protein
MT0596	1404.41	1164.1	465.669	436.34	0.351182	-1.50971	9.16025	12.0751	0.000510992	0.0122711	Rv0570	nrdZ	ribonucleotide reductase, class II
MT0597	384.157	353.728	221.294	184.236	0.549599	-0.863549	7.62784	5.52501	0.0187465	0.125466	Rv0571c	Rv0571c	conserved hypothetical protein
MT0598	406.057	521.998	322.918	329.926	0.703474	-0.50743	7.99704	1.96788	0.160673	0.434957
MT0599	486.629	612.37	295.699	268.059	0.512994	-0.962987	8.01877	7.18702	0.00734328	0.0721815	Rv0572c	Rv0572c	hypothetical protein
MT0600	1141.78	1366.54	605.306	461.468	0.425303	-1.23344	9.0721	7.76076	0.00533935	0.0578913
MT0601	131.751	103.471	43.1752	33.2756	0.325079	-1.62114	5.75679	22.2901	2.34414e-06	0.000199003	Rv0573c	Rv0573c	conserved hypothetical protein
MT0602	278.489	249.079	67.1946	51.6699	0.22534	-2.14982	6.78601	25.5489	4.31307e-07	5.21489e-05	Rv0574c	Rv0574c	conserved hypothetical protein
MT0604	47.6928	23.8406	18.1745	10.6853	0.403555	-1.30916	4.31683	5.7811	0.0161994	0.114399	Rv0575c	Rv0575c	possible oxidoreductase
MT0605	224.638	187.606	165.491	195.604	0.875865	-0.19122	7.53944	0.328587	0.566492	0.797314	Rv0576	Rv0576	putative transcriptional regulator
MT0606	216.273	249.495	151.156	193.311	0.739568	-0.435246	7.62613	1.77674	0.18255	0.46239	Rv0577	Rv0577	conserved hypothetical protein
MT0607	422.671	414.369	243.991	167.159	0.491226	-1.02554	8.44098	8.86899	0.00290055	0.0396342	Rv0578c	PE_PGRS	PE_PGRS-family protein
MT0608	7.02903	11.7817	19.1558	14.2958	1.78313	0.834412	3.60697	5.69607	0.0170029	0.118397
MT0608.1	103.344	62.0271	47.8682	46.2541	0.569022	-0.813444	6.21672	5.84504	0.015621	0.113068	Rv0579	Rv0579	conserved hypothetical protein
MT0609	86.4396	71.7297	43.5165	50.6941	0.595515	-0.747789	6.24424	5.70905	0.0168777	0.117731	Rv0580c	Rv0580c	hypothetical protein
MT0610	8.24894	12.3361	15.3161	22.6391	1.84543	0.883958	3.64749	5.8122	0.0159154	0.113742
MT0611	100.846	168.478	173.085	201.313	1.3903	0.475394	6.96365	1.51631	0.218179	0.500594	Rv0583c	lpqN	equivalent to MKU20446_1 MK35
MT0612	39.4439	34.2362	84.2173	59.7693	1.9539	0.96636	5.41919	10.1811	0.00141886	0.0234907	Rv0584	Rv0584	hypothetical protein
MT0613	25.8506	37.6321	54.8223	49.7671	1.64864	0.721274	5.17146	5.26629	0.0217423	0.136188	Rv0585c	Rv0585c	possible membrane protein
MT0614	2.84647	4.85128	7.72205	7.90418	2.03991	1.02851	2.25199	8.31953	0.0039221	0.0478036
MT0615	148.132	161.27	152.862	158.425	1.00612	0.0087968	7.29803	0.000777625	0.977753	0.988705	Rv0586	Rv0586	transcriptional regulator (GntR family)
MT0616	173.983	149.558	179.271	147.398	1.00965	0.0138621	7.4169	0.00159617	0.968131	0.988615	Rv0587	Rv0587	part of mce2 operon
MT0617	158.415	188.784	201.499	179.161	1.09645	0.132837	7.51621	0.156131	0.692744	0.866744	Rv0588	Rv0588	part of mce2 operon
MT0618	128.672	136.875	184.86	158.132	1.2917	0.369268	7.13336	1.27316	0.259175	0.544018	Rv0589	mce2	cell invasion protein
MT0619	121.991	122.46	171.72	143.153	1.28811	0.365259	7.08647	1.28972	0.2561	0.540789	Rv0590	Rv0590	part of mce2 operon
MT0620	2.49792	4.85128	7.25275	6.29407	1.85771	0.893528	2.43081	6.7297	0.00948207	0.0842616
MT0621	17.7759	18.4349	32.8934	21.7609	1.50977	0.594326	4.32299	2.35229	0.125099	0.384846	Rv0591	Rv0591	part of mce2 operon
MT0622	17.6597	20.6526	29.9496	22.9319	1.38088	0.46559	4.32065	1.43973	0.230183	0.514208	Rv0592	Rv0592	part of mce2 operon
MT0623	15.6265	16.8409	21.8009	17.3697	1.20696	0.271376	4.0543	0.552154	0.457439	0.72341	Rv0593	lprL	part of mce2 operon
MT0624	41.0704	41.3052	57.0408	46.0101	1.25115	0.323251	5.38612	1.15898	0.281676	0.567048	Rv0594	Rv0594	part of mce2 operon
MT0625	32.2987	36.6618	43.8578	39.7161	1.21227	0.277709	5.10926	0.873735	0.349923	0.634057	Rv0595c	Rv0595c	conserved hypothetical protein
MT0626	18.8215	31.3947	23.7208	20.3947	0.879627	-0.185036	4.36448	0.30695	0.579558	0.804605
MT0627	183.684	142.697	233.667	109.829	1.05247	0.0737747	7.31024	0.0368288	0.847814	0.931339	Rv0597c	Rv0597c	conserved hypothetical protein
MT0628	202.796	148.241	145.439	113.391	0.737311	-0.439655	7.14029	1.65084	0.198845	0.479523	Rv0598c	Rv0598c	conserved hypothetical protein
MT0629	35.668	22.8703	23.1235	22.5416	0.779557	-0.359274	4.57727	1.14657	0.284269	0.570571	Rv0599c	Rv0599c	conserved hypothetical protein
MT0630	6.97094	6.65319	5.58889	5.46462	0.811285	-0.30172	2.67634	0.873138	0.350088	0.634068	Rv0601c	Rv0601c	sensor histidine kinase
MT0631	2.6141	2.84147	2.77311	3.75693	1.19506	0.257079	1.75959	0.523586	0.469316	0.733191	Rv0602c	tcrA	two-component response regulator
MT0632	76.0413	84.9667	71.6743	79.1882	0.937029	-0.0938342	6.361	0.092232	0.761359	0.899311	Rv0604	lpqO	lipoprotein
MT0633	26.1991	27.9295	16.0414	30.7873	0.864724	-0.209688	4.8614	0.311222	0.576931	0.80262	Rv0605	Rv0605	resolvase
MT0635	71.9749	52.3938	42.3219	64.9899	0.862493	-0.213415	6.00536	0.359747	0.548647	0.787352	Rv0606	Rv0606	transposase
MT0636	9.93358	8.17788	10.8791	13.4176	1.33896	0.421117	3.38358	1.72639	0.188873	0.469242	Rv0607	Rv0607	hypothetical protein
MT0637	95.8504	89.8873	72.1862	76.7974	0.802072	-0.318196	6.19951	1.11562	0.290863	0.577384	Rv0608	Rv0608	conserved hypothetical protein
MT0638	98.8711	81.8481	67.9626	80.9447	0.823827	-0.279587	6.32113	0.749321	0.386691	0.664756	Rv0609	Rv0609	conserved hypothetical protein
MT0638.1	83.6512	72.9771	77.1352	70.4058	0.941934	-0.0863026	6.19214	0.0659813	0.79728	0.914037
MT0639	3.89211	4.36615	8.74597	7.90418	2.01868	1.01341	2.59459	10.7653	0.00103422	0.0193735
MT0640	21.5518	25.6425	31.4002	37.0326	1.45026	0.536314	4.84063	2.65511	0.103218	0.342659	Rv0610c	Rv0610c	possible monooxygenase
MT0641	41.7675	53.9878	52.8598	59.4277	1.17286	0.230027	5.76847	0.425476	0.514217	0.762581	Rv0611c	Rv0611c	hypothetical protein
MT0642	18.473	19.1279	28.9683	27.0303	1.48945	0.574782	4.41707	3.80989	0.0509509	0.23335	Rv0612	Rv0612	hypothetical protein
MT0643	480.878	371.955	309.565	356.615	0.781108	-0.356406	8.63707	1.07794	0.299158	0.586587	Rv0613c	Rv0613c	hypothetical protein
MT0644	9.46885	10.3956	11.903	13.1248	1.26014	0.33358	3.34725	1.16959	0.279486	0.564347	Rv0614	Rv0614	conserved hypothetical protein
MT0645	71.1035	38.6023	75.8126	45.2295	1.1031	0.14156	5.69113	0.112255	0.737591	0.884015	Rv0615	Rv0615	possible membrane protein
MT0645.1	2.49792	1.45538	2.43181	2.00044	1.11148	0.152476	1.1328	0.179036	0.672203	0.857436	Rv0616c	Rv0616c	hypothetical protein
MT0645.2	44.8464	55.5818	48.3801	42.7899	0.908159	-0.138984	5.54657	0.212895	0.644508	0.841999
MT0646	60.2986	47.5426	56.3155	50.8893	0.993915	-0.00880544	5.76285	0.000738542	0.978319	0.988705	Rv0617	Rv0617	conserved hypothetical protein
MT0649	44.2654	23.0782	26.2806	20.9314	0.700849	-0.512825	4.96719	1.27096	0.259587	0.544018	Rv0621	Rv0621	membrane spanning ATP/GTP-binding protein
MT0650	40.141	22.3159	49.1481	24.298	1.17563	0.23344	4.90588	0.274717	0.600185	0.817038	Rv0622	Rv0622	potential membrane spanning protein
MT0651	9.52695	3.88103	5.97285	7.36748	0.991066	-0.012947	3.15836	0.000805044	0.977364	0.988705
MT0652	57.2779	38.0479	47.3562	40.7407	0.923886	-0.114213	5.39101	0.107008	0.743576	0.88808
MT0653	17.4273	17.1874	13.0976	15.1741	0.816486	-0.292499	4.44646	0.915743	0.338595	0.622268	Rv0625c	Rv0625c	probable integral membrane protein
MT0654	23.4107	24.9495	29.8216	44.0097	1.52633	0.610067	5.15212	3.04673	0.0808998	0.304721	Rv0626	Rv0626	conserved hypothetical protein
MT0655	9.29458	6.09875	4.86361	5.36704	0.663342	-0.592175	2.94791	2.16244	0.14142	0.407546
MT0656	148.307	70.205	46.5456	42.546	0.407679	-1.29449	6.52286	9.26989	0.00232952	0.034172	Rv0628c	Rv0628c	conserved hypothetical protein
MT0657	31.6016	15.732	37.5437	27.3719	1.37027	0.454465	4.78648	1.21857	0.269641	0.553684	Rv0629c	recD	exodeoxyribonuclease V
MT0658	35.7841	22.5931	42.2366	38.0084	1.37348	0.457835	5.0195	1.94727	0.162881	0.43764	Rv0630c	recB	exodeoxyribonuclease V
MT0659	44.2654	31.5333	52.1345	50.6453	1.35515	0.438454	5.42632	2.13735	0.14375	0.412387	Rv0631c	recC	exodeoxyribonuclease V
MT0660	1061.56	733.583	530.134	438.877	0.539796	-0.889515	9.41798	5.32048	0.0210762	0.134983	Rv0632c	echA3	enoyl-CoA hydratase/isomerase superfamily
MT0661	151.385	115.391	144.33	117.197	0.980262	-0.0287611	7.04915	0.00732962	0.931774	0.972222	Rv0633c	Rv0633c	hypothetical protein
MT0662	343.028	264.811	212.42	182.138	0.649111	-0.623462	7.9688	2.91779	0.0876078	0.317057	Rv0634c	Rv0634c	putative glyoxylase II
MT0662.1	148.829	196.962	127.819	143.69	0.785242	-0.348792	7.29494	1.20672	0.271983	0.556518
MT0663	315.319	554.917	518.828	539.777	1.2165	0.282737	8.66566	0.421094	0.516392	0.763395
MT0664	385.783	779.116	635.938	751.922	1.19143	0.252698	9.18708	0.318927	0.572253	0.799696	Rv0635	Rv0635	conserved hypothetical protein
MT0665	197.858	312.423	295.87	373.058	1.31097	0.390632	8.10757	1.07709	0.299349	0.586587	Rv0636	Rv0636	hypothetical protein
MT0666	379.8	612.925	625.913	711.767	1.34752	0.430304	9.12665	1.09266	0.295882	0.582423	Rv0637	Rv0637	conserved hypothetical protein
MT0667	194.489	335.778	192.411	224.928	0.787091	-0.345398	7.85434	0.818702	0.36556	0.647224	Rv0638	secE	SecE preprotein translocase
MT0668	1002.01	1404.45	935.477	1064.19	0.830964	-0.267143	10.0148	0.464388	0.49558	0.747586	Rv0639	nusG	transcription antitermination protein
MT0669	567.318	944.06	536.106	634.774	0.774726	-0.368241	9.30192	0.828623	0.362671	0.645144	Rv0640	rplK	50S ribosomal protein L11
MT0669.1	923.939	1513.88	802.069	1130.98	0.792949	-0.334699	10.0357	0.623592	0.429716	0.701767	Rv0641	rplA	50S ribosomal protein L1
MT0670	1129.41	1472.02	1514.67	1578.54	1.18905	0.249813	10.3606	0.35814	0.549541	0.788163	Rv0642c	mmaA4	methoxymycolic acid synthase 4
MT0671	229.402	401.825	338.234	420.727	1.20242	0.265936	8.34572	0.429312	0.512327	0.762581	Rv0643c	mmaA3	methoxymycolic acid synthase 3
MT0672	208.315	370.777	288.873	393.355	1.17817	0.236542	8.13739	0.385559	0.534643	0.777981	Rv0644c	mmaA2	methoxymycolic acid synthase 2
MT0673	166.431	189.061	71.8876	76.7974	0.418277	-1.25747	7.0018	15.0834	0.000102863	0.00375981	Rv0645c	mmaA1	methoxymycolic acid synthase 1
MT0674	85.0454	108.946	102.989	131.395	1.20829	0.272963	6.93809	0.614169	0.433222	0.704958	Rv0646c	lipG	probable hydrolase
MT0675	136.34	164.251	153.502	187.358	1.134	0.181422	7.52021	0.299135	0.584425	0.80799	Rv0647c	Rv0647c	conserved hypothetical protein
MT0676	116.996	67.71	63.3549	65.7706	0.698929	-0.516783	6.66237	1.92363	0.165457	0.440091	Rv0648	Rv0648	conserved hypothetical protein
MT0677	3.60165	1.8019	1.45055	1.70769	0.578961	-0.788462	1.42489	3.89773	0.0483513	0.225376
MT0679	4.35683	2.49495	2.60246	1.85407	0.648935	-0.623855	1.96625	2.77797	0.0955692	0.332564
MT0680	298.588	378.469	266.432	357.981	0.922255	-0.116762	8.17729	0.113955	0.735686	0.883886	Rv0651	rplJ	50S ribosomal protein L10
MT0681	43.6264	80.8778	44.8391	89.5319	1.07939	0.110222	6.10149	0.0709769	0.78992	0.912501	Rv0652	rplL	50S ribosomal protein L7/L12
MT0682	21.3194	14.2073	12.8843	13.564	0.743587	-0.427426	4.26207	1.64376	0.19981	0.480266	Rv0653c	Rv0653c	putative transcriptional regulator
MT0683	191.352	141.034	85.2838	81.335	0.501266	-0.996351	7.34001	7.4033	0.00651043	0.0669314	Rv0654	Rv0654	putative dioxygenase
MT0684	1158.1	1334.52	934.197	990.755	0.772263	-0.372835	9.81971	0.975955	0.323199	0.607426	Rv0655	Rv0655	ABC transporter
MT0685	9.52695	12.7519	13.2683	11.5147	1.11445	0.156332	3.59571	0.249824	0.617199	0.829665	Rv0656c	Rv0656c	similar to beta dioxygenases
MT0686	16.7302	21.9694	20.521	17.6624	0.987798	-0.0177117	4.37013	0.00339064	0.953566	0.980095	Rv0657c	Rv0657c	conserved hypothetical protein
MT0687	24.2821	18.7814	31.3148	17.2233	1.12716	0.172696	4.51285	0.222905	0.636836	0.83871	Rv0658c	Rv0658c	probable membrane protein
MT0688	243.402	174.369	221.337	170.525	0.937954	-0.0924112	7.7707	0.0582571	0.809272	0.919085	Rv0659c	Rv0659c	conserved hypothetical protein
MT0689	381.31	139.44	200.176	143.349	0.659634	-0.600263	8.01936	1.74597	0.186384	0.466838	Rv0660c	Rv0660c	conserved hypothetical protein
MT0690	10.1079	4.85128	5.41823	4.29363	0.648003	-0.625927	2.81559	2.29567	0.129735	0.391561	Rv0661c	Rv0661c	conserved hypothetical protein
MT0691	6.27384	2.56425	5.50356	3.46418	1.01058	0.0151779	2.54174	0.00125635	0.971725	0.988705	Rv0662c	Rv0662c	hypothetical protein
MT0692	306.14	392.885	536.106	473.812	1.44481	0.530875	8.59965	2.37737	0.123104	0.381653	Rv0663	atsD	proable arylsulfatase
MT0692.1	4.47302	6.9304	8.31933	13.2224	1.89242	0.920229	3.10872	6.99542	0.00817184	0.0772645	Rv0664	Rv0664	hypothetical protein
MT0693	4.53111	8.5937	10.2818	13.0273	1.78112	0.832783	3.07199	4.92216	0.0265143	0.153545	Rv0665	Rv0665	conserved hypothetical protein
MT0694	2.26555	5.40571	6.2715	7.31869	1.78389	0.835027	2.4417	4.83173	0.0279406	0.157908
MT0695	2679.05	6137.57	5642.34	6804.77	1.41178	0.497518	12.1031	0.778781	0.377514	0.656904	Rv0667	rpoB	[beta] subunit of RNA polymerase
MT0696	1675.52	3187.92	2985.02	3604.6	1.35494	0.438225	11.2043	0.769714	0.380305	0.659614	Rv0668	rpoC	[beta]' subunit of RNA polymerase
MT0697	86.3815	69.9278	110.114	70.113	1.153	0.205397	6.19946	0.425257	0.514326	0.762581
MT0699	1136.32	477.089	521.729	290.161	0.503216	-0.990752	9.18102	3.12054	0.0773111	0.295342	Rv0670	end	endonuclease IV (apurinase)
MT0700	243.169	179.29	228.078	157.01	0.911531	-0.133637	7.65012	0.0969381	0.755535	0.895221	Rv0671	lpqP	probable esterase
MT0701	239.219	218.377	253.974	229.758	1.0571	0.0801179	8.39209	0.0595295	0.807241	0.918645	Rv0672	fadE8	acyl-CoA dehydrogenase (aka aidB)
MT0702	50.8297	34.2362	34.7279	33.5196	0.801962	-0.318395	5.81944	0.897229	0.343526	0.626734	Rv0673	echA4	enoyl-CoA hydratase/isomerase superfamily
MT0703	37.0621	25.4346	37.5437	30.0554	1.08121	0.11265	5.47398	0.101123	0.750486	0.89272	Rv0674	Rv0674	hypothetical protein
MT0704	32.1244	26.9593	37.0317	46.5468	1.41366	0.499437	5.46966	2.82781	0.0926444	0.327415	Rv0675	echA5	enoyl-CoA hydratase/isomerase superfamily
MT0705	678.563	667.536	634.872	458.686	0.812402	-0.299734	9.79639	0.61944	0.431256	0.703192	Rv0676c	mmpL5	conserved large membrane protein
MT0706	365.684	311.937	305.512	168.866	0.700095	-0.514378	8.56217	1.91799	0.166078	0.440886	Rv0677c	mmpS5	conserved small membrane protein
MT0706.1	242.066	172.567	239.639	125.784	0.88133	-0.182246	8.0066	0.220818	0.638417	0.839303	Rv0678	Rv0678	hypothetical protein
MT0707	42.7551	65.5616	37.629	45.815	0.770573	-0.375996	5.81382	1.06645	0.301748	0.588564
MT0708	40.1991	37.9093	32.2108	37.3253	0.890065	-0.168017	5.49276	0.289008	0.590857	0.810423
MT0709	92.2487	109.639	98.8934	106.609	1.01799	0.0257222	6.71979	0.0073884	0.931502	0.972192	Rv0681	Rv0681	transcriptional regulator (TetR/AcrR family)
MT0710	188.39	397.112	326.758	361.641	1.17584	0.233687	8.04986	0.345288	0.556793	0.79302	Rv0682	rpsL	30S ribosomal protein S12
MT0711	277.443	576.194	511.703	667.854	1.38185	0.466605	8.86418	1.10551	0.29306	0.579153	Rv0683	rpsG	30S ribosomal protein S7
MT0712	1022	1755.54	1554.9	1830.6	1.2189	0.285575	10.446	0.368224	0.543974	0.784407	Rv0684	fusA	elongation factor G
MT0713	1362	2507.35	1927.23	2534.02	1.15298	0.205361	10.8481	0.161545	0.687738	0.864004	Rv0685	tuf	elongation factor EF-Tu
MT0714	139.128	146.37	130.08	177.893	1.07867	0.109255	7.15585	0.118227	0.730966	0.881261	Rv0686	Rv0686	potential membrane protein
MT0715	87.0786	69.9278	68.9011	70.9425	0.890562	-0.167212	6.26482	0.239537	0.62454	0.834465	Rv0687	Rv0687	putative dehydrogenase, SDR family
MT0716	279.999	295.651	277.61	273.816	0.957931	-0.0620065	7.9948	0.0357698	0.849992	0.931948	Rv0688	Rv0688	putative oxidoreductase
MT0718	114.904	134.796	363.662	236.979	2.4056	1.2664	7.53964	12.4646	0.00041473	0.0106032	Rv0690c	Rv0690c	hypothetical protein
MT0719	71.1035	91.8278	199.109	136.908	2.06272	1.04455	6.85819	9.68768	0.00185507	0.028913	Rv0691c	Rv0691c	transcriptional regulator (TetR/AcrR family)
MT0719.1	29.7427	43.6615	59.9419	76.5535	1.86014	0.895412	6.08946	6.89002	0.00866781	0.0795047
MT0719.2	143.834	267.86	261.782	366.129	1.52528	0.609077	8.47043	1.92307	0.165518	0.440091	Rv0692	Rv0692	hypothetical protein
MT0720	260.481	322.056	268.608	342.222	1.04858	0.0684377	8.68468	0.0333683	0.855057	0.933761	Rv0693	pqqE	coenzyme pqq synthesis protein E
MT0721	189.203	196.546	170.482	233.759	1.0479	0.0675043	8.10914	0.0392973	0.842861	0.929618	Rv0694	lldD1	L-lactate dehydrogenase (cytochrome)
MT0722	104.448	105.065	118.391	115.44	1.11607	0.158432	6.96932	0.265568	0.60632	0.822864	Rv0695	Rv0695	conserved hypothetical protein
MT0723	70.4065	79.0066	63.7389	68.6981	0.886444	-0.173899	6.13315	0.336152	0.562059	0.795536	Rv0696	Rv0696	glycosyltransferase
MT0724	10.9792	12.7519	13.5669	12.0514	1.08057	0.111792	3.63633	0.123311	0.725471	0.879692	Rv0697	Rv0697	gmc-type oxidoreductase
MT0725	5.75102	3.32659	11.3058	7.2211	2.03236	1.02316	2.66278	7.73627	0.00541226	0.0585228
MT0726	1.56846	2.70286	8.06335	7.85539	3.75046	1.90707	2.00423	23.8345	1.04981e-06	0.000102165
MT0726.1	1.68464	2.42564	2.94376	3.3666	1.54041	0.623313	1.61311	2.17771	0.140023	0.405625
MT0727	452.762	1186.9	714.183	1106.34	1.11032	0.150981	9.63114	0.0903885	0.763684	0.900709	Rv0700	rpsJ	30S ribosomal protein S10
MT0728	399.435	979.89	633.08	1039.01	1.21228	0.277718	9.50589	0.304999	0.580765	0.805212	Rv0701	rplC	50S ribosomal protein L3
MT0729	278.198	396.766	340.538	543.73	1.31011	0.389686	8.67708	0.743091	0.388672	0.667874	Rv0702	rplD	50S ribosomal protein L4
MT0730	151.56	386.717	199.536	324.559	0.973706	-0.0384424	7.92019	0.00579066	0.939342	0.97501	Rv0703	rplW	50S ribosomal protein L23
MT0731	454.215	887.923	567.677	934.596	1.11933	0.162634	9.41647	0.109874	0.740287	0.885416	Rv0704	rplB	50S ribosomal protein L2
MT0732	268.032	640.369	295.912	541.046	0.921373	-0.118142	8.67084	0.0493078	0.824272	0.923468
MT0733	98.6387	154.687	114.295	177.746	1.15289	0.205251	7.08157	0.212392	0.644899	0.841999
MT0734	374.049	819.659	472.965	674.002	0.960866	-0.0575928	9.06339	0.0138811	0.906212	0.957802	Rv0707	rpsC	30S ribosomal protein S3
MT0735	132.099	273.404	152.948	208.875	0.892348	-0.164321	7.42537	0.13376	0.714565	0.877807	Rv0708	rplP	50S ribosomal protein L16
MT0736	176.016	436.754	189.297	364.422	0.903663	-0.146143	8.07578	0.0774484	0.780785	0.907877	Rv0709	rpmC	50S ribosomal protein L29
MT0737	223.07	516.246	252.822	445.22	0.944204	-0.0828301	8.35965	0.0281149	0.866839	0.938835	Rv0710	rpsQ	30S ribosomal protein S17
MT0738	123.502	208.882	192.966	336.172	1.59202	0.670855	8.17416	2.24676	0.133895	0.396509
MT0739	209.419	97.9266	116.471	103.681	0.716212	-0.481542	7.04514	1.3635	0.242932	0.52701	Rv0712	Rv0712	conserved hypothetical protein
MT0740	142.962	158.152	188.102	175.697	1.20823	0.272898	7.28809	0.753381	0.385408	0.664216	Rv0713	Rv0713	potential membrane protein
MT0741	254.265	567.6	378.38	429.607	0.983165	-0.024494	8.5571	0.00315274	0.955223	0.980787
MT0741.1	200.298	470.99	303.506	427.753	1.08939	0.123521	8.36625	0.069974	0.791375	0.913037	Rv0715	rplX	50S ribosomal protein L24
MT0742	235.85	523.245	327.696	484.009	1.06935	0.0967329	8.55626	0.0446889	0.832577	0.926081	Rv0716	rplE	50S ribosomal protein L5
MT0742.1	178.805	467.802	269.76	369.838	0.98921	-0.0156508	8.26075	0.000959863	0.975284	0.988705	Rv0717	rpsN	30S ribosomal protein S14
MT0743	225.336	536.76	338.874	596.229	1.22705	0.2952	8.71562	0.342371	0.558464	0.79411	Rv0718	rpsH	30S ribosomal protein S8
MT0744	275.991	449.852	345.359	479.813	1.13688	0.185076	8.54406	0.196108	0.65788	0.849496	Rv0719	rplF	50S ribosomal protein L6
MT0745	103.809	183.309	124.022	184.382	1.0742	0.10326	7.30495	0.0439027	0.834035	0.926105	Rv0720	rplR	50S ribosomal protein L18
MT0746	313.111	380.063	289.641	473.129	1.10039	0.138019	8.55248	0.128126	0.720383	0.879381	Rv0721	rpsE	30S ribosomal protein S5
MT0747	83.0703	167.716	97.7415	156.571	1.01416	0.0202868	7.02287	0.00205064	0.963881	0.986124	Rv0722	rpmD	50S ribosomal protein L30
MT0748	355.285	541.195	352.996	507.331	0.95969	-0.0593596	8.78286	0.0237906	0.877419	0.943894	Rv0723	rplO	50S ribosomal protein L15
MT0749	1196.85	715.218	762.563	551.634	0.687313	-0.540961	9.83026	1.5827	0.208372	0.488174	Rv0724	sppA	protease IV, signal peptide peptidase
MT0751	137.792	222.605	200.133	248.689	1.24546	0.316676	7.9047	0.72932	0.393104	0.671791	Rv0726c	Rv0726c	conserved hypothetical protein
MT0752	7.66803	6.51458	4.73562	5.75737	0.738262	-0.437796	2.83816	1.86876	0.171617	0.450494	Rv0727c	fucA	L-fuculose phosphate aldolase
MT0753	8.5394	5.89084	4.5223	5.80616	0.712997	-0.488033	2.95662	2.22683	0.135632	0.398506	Rv0728c	Rv0728c	similar to D-3-phosphoglycerate dehydrogenases
MT0754	32.7053	24.8801	19.4971	25.469	0.780122	-0.358228	4.93682	1.389	0.238575	0.523893	Rv0729	xylB	xylulose kinase
MT0755	195.999	137.083	100.344	121.051	0.664585	-0.589475	7.29874	3.27613	0.0702947	0.279514	Rv0730	Rv0730	conserved hypothetical protein
MT0756	30.9045	34.9985	31.5708	41.2286	1.10461	0.143535	5.20673	0.197408	0.656821	0.849047	Rv0731c	Rv0731c	conserved hypothetical protein
MT0756.1	778.828	1345.54	1254.77	1341.37	1.22209	0.289354	10.0779	0.430322	0.511831	0.762581	Rv0732	secY	SecY subunit of preprotein translocase
MT0757	201.518	311.799	273.514	367.3	1.24844	0.320123	8.09872	0.761187	0.382957	0.662008	Rv0733	adk	probable adenylate kinase
MT0758	84.3483	86.2835	89.7635	132.322	1.30141	0.380075	6.6655	1.34991	0.245294	0.529611	Rv0734	map'	probable methionine aminopeptidase
MT0759	26.0248	25.0188	22.7822	28.3965	1.00228	0.0032859	4.81393	0.000108026	0.991707	0.994449	Rv0735	sigL	sigma-70 factors ECF subfamily
MT0760	8.36512	11.9203	11.0498	14.247	1.24827	0.31993	3.87791	0.853379	0.355598	0.639328	Rv0736	Rv0736	hypothetical protein
MT0762	15.7427	16.1478	18.2599	16.7354	1.09764	0.134405	4.03699	0.209866	0.646872	0.843465	Rv0737	Rv0737	putative transcriptional regulator
MT0763	35.4356	25.7811	11.2631	12.9785	0.395712	-1.33748	4.83485	18.2552	1.93194e-05	0.00110153	Rv0738	Rv0738	possible membrane protein
MT0764	21.1452	22.8703	26.2806	25.5666	1.17814	0.236515	4.55211	0.520692	0.470547	0.734231	Rv0739	Rv0739	conserved hypothetical protein
MT0765	39.9667	59.3936	45.0951	47.9618	0.936896	-0.0940386	5.56676	0.0745638	0.784804	0.910918	Rv0740	Rv0740	conserved hypothetical protein
MT0766	312.879	394.271	450.225	309.532	1.07445	0.103599	8.31234	0.0840002	0.771948	0.902412
MT0767	53.7924	61.2648	43.0899	50.4989	0.813454	-0.297866	5.80129	1.06451	0.30219	0.589027	Rv0741	Rv0741	truncated copy of IS1557
MT0768	3.83401	3.60381	4.181	4.73275	1.19648	0.2588	2.5825	0.491644	0.483195	0.740814	Rv0742	PE_PGRS	PE_PGRS-family protein
MT0768.1	2.26555	2.35634	1.40789	2.29319	0.79667	-0.327945	1.16918	0.834659	0.360929	0.643479
MT0769	24.4564	26.1969	18.6865	20.5411	0.774492	-0.368678	4.59314	1.56204	0.211367	0.492615	Rv0743c	Rv0743c	hypothetical protein
MT0770	20.8547	21.0684	15.0601	22.6879	0.899818	-0.152295	4.43776	0.243198	0.621906	0.832966	Rv0744c	Rv0744c	putative transcriptional regulator
MT0772.1	24.5725	20.7219	17.0226	20.4435	0.826615	-0.274713	4.64008	0.733345	0.391801	0.671515
MT0772.5	116.415	86.838	46.4603	38.5939	0.418489	-1.25674	6.32189	14.3609	0.000150906	0.00497617
MT0772.6	13.7095	10.4649	10.2392	12.4906	0.939039	-0.090743	4.39033	0.0586365	0.808664	0.91902	Rv0747	PE_PGRS	PE_PGRS-family protein
MT0773	42.058	44.6318	44.2845	48.6449	1.07198	0.100278	5.68103	0.0945572	0.758462	0.897734	Rv0749	Rv0749	conserved hypothetical protein
MT0773.1	28.9875	23.3555	24.8727	15.1741	0.765334	-0.385839	4.51078	1.28937	0.256163	0.540789
MT0774	961.35	1090.98	1241.42	767.34	0.97878	-0.0309433	9.86267	0.00615677	0.937458	0.974514	Rv0750	Rv0750	conserved hypothetical protein
MT0775	70.9293	48.998	88.6116	71.3816	1.33369	0.415425	6.06524	1.73382	0.187923	0.468379	Rv0751c	mmsB	methylmalmonate semialdehyde oxidoreductase
MT0776	60.1243	48.6514	118.007	79.5785	1.81618	0.860911	6.13801	6.82989	0.00896447	0.0812915	Rv0752c	fadE9	acyl-CoA dehydrogenase
MT0777	82.3151	67.2249	130.379	102.12	1.55456	0.636509	6.57699	4.38298	0.0362994	0.185666	Rv0753c	mmsA	methylmalmonate semialdehyde dehydrogenase
MT0778	97.2446	55.3739	123.041	59.9156	1.19865	0.26141	6.31416	0.377233	0.539088	0.781599	Rv0754	PE_PGRS	PE_PGRS-family protein
MT0779	266.696	396.003	266.304	217.219	0.729684	-0.454655	8.06656	1.59063	0.207236	0.487531	Rv0755c	PPE	PPE-family protein
MT0780	44.2074	52.6711	42.9192	46.4005	0.922147	-0.116932	5.74468	0.153482	0.69523	0.868493
MT0781	108.805	87.4617	53.3291	66.8928	0.612463	-0.707306	6.90843	3.44738	0.063352	0.262759
MT0782	310.207	359.757	324.113	302.311	0.93504	-0.0968999	8.4155	0.0869188	0.768131	0.90081	Rv0757	phoP	two-component response regulator
MT0783	243.169	217.407	226.115	201.654	0.928763	-0.106618	7.84092	0.102083	0.749344	0.891969	Rv0758	phoR	sensor histidine kinase
MT0784	160.099	169.518	165.96	140.421	0.929564	-0.105374	7.14603	0.117089	0.732214	0.881839	Rv0759c	Rv0759c	conserved hypothetical protein
MT0785	60.8795	92.6595	63.7389	90.8981	1.00731	0.010511	6.18281	0.00105133	0.974134	0.988705	Rv0760c	Rv0760c	conserved hypothetical protein
MT0786	347.036	503.771	383.415	413.847	0.937094	-0.0937351	8.6009	0.0581529	0.80944	0.919085	Rv0761c	adhB	zinc-containing alcohol dehydrogenase
MT0787	41.8256	28.4147	62.6296	40.6431	1.46983	0.555653	5.32116	2.07384	0.149844	0.421041	Rv0762c	Rv0762c	hypothetical protein
MT0787.1	24.0497	14.4152	35.2398	20.8339	1.45679	0.542795	4.34615	1.87551	0.170845	0.449375
MT0788	142.091	82.3332	173.213	84.7016	1.14916	0.200583	6.81735	0.185524	0.666668	0.854209	Rv0764c	Rv0764c	possible lanosterol 14-demethylase cytochrome P450
MT0789	52.6887	26.4048	64.4215	30.6897	1.20223	0.265718	5.48746	0.294004	0.587666	0.80799	Rv0765c	Rv0765c	short-chain alcohol dehydrogenase family
MT0790	58.672	45.3941	97.1442	67.771	1.58446	0.663994	5.97127	3.46125	0.0628229	0.261305	Rv0766c	Rv0766c	cytochrome p-450
MT0791	20.9709	16.633	24.574	25.4202	1.3284	0.409689	4.40811	1.67173	0.196027	0.47692	Rv0767c	Rv0767c	hypothetical protein
MT0792	41.8256	45.3941	76.7512	81.579	1.81538	0.860268	5.74917	9.15551	0.0024797	0.0361095	Rv0768	aldA	aldehyde dehydrogenases
MT0793	28.4647	36.7311	52.3905	49.4743	1.56314	0.64445	5.15219	4.38371	0.036284	0.185666	Rv0769	Rv0769	similar to 7-alpha-hydroxysteroid dehydrogenase
MT0794	15.7427	18.7121	30.9735	30.1042	1.77358	0.826663	4.37243	7.38823	0.0065652	0.0669953	Rv0770	Rv0770	similar to 3-hydroxyisobutyrate dehydrogenase
MT0795	8.24894	11.5738	16.8093	18.3943	1.77831	0.830503	3.65743	6.33917	0.01181	0.0962199	Rv0771	Rv0771	probable 4-carboxymuconolactone decarboxylase
MT0796	40.1991	48.5128	88.6116	84.4088	1.95081	0.964074	5.73817	10.3637	0.00128514	0.0217823	Rv0772	purD	phosphoribosylamine-glycine ligase
MT0797	81.7342	95.1544	109.645	110.171	1.24278	0.313574	6.63938	0.997402	0.31794	0.602879	Rv0773c	ggtA	putative [gamma]-glutamyl transpeptidase
MT0798	92.4811	98.9662	111.607	118.416	1.20151	0.264853	6.76847	0.687201	0.407118	0.684604	Rv0774c	Rv0774c	conserved hypothetical protein
MT0799	105.842	89.4715	151.241	144.129	1.51212	0.596571	7.0042	3.63268	0.0566555	0.24795	Rv0775	Rv0775	conserved hypothetical protein
MT0800	7.14521	8.31648	11.903	16.4914	1.8363	0.876805	3.71788	6.59337	0.0102359	0.088645	Rv0776c	Rv0776c	conserved hypothetical protein
MT0801	197.336	196.269	218.052	218.194	1.10833	0.148389	7.63133	0.215726	0.642316	0.841258	Rv0777	purB	adenylosuccinate lyase
MT0802	152.199	154.409	190.662	187.017	1.2318	0.300766	7.30407	0.945846	0.330779	0.617021	Rv0778	Rv0778	similar linalool 8-monooxygenase, cytochrome p-450
MT0803	7.31948	5.96015	10.4098	14.0031	1.83284	0.874079	3.20332	7.85518	0.00506752	0.0559399	Rv0779c	Rv0779c	conserved hypothetical protein
MT0804	58.672	83.5114	112.631	117.197	1.61674	0.693084	6.35675	4.00745	0.0452996	0.216721
MT0805	259.261	436.477	756.163	707.083	2.10325	1.07262	8.75548	6.87694	0.00873148	0.0798237	Rv0781	ptrBb	protease II, [beta] subunit
MT0806	8.13276	6.44528	23.0808	14.9789	2.60692	1.38235	3.4073	18.2429	1.94447e-05	0.00110153
MT0807	243.867	219.694	326.63	258.203	1.2616	0.335259	7.82286	1.01482	0.31375	0.598119	Rv0783c	Rv0783c	multidrug resistance protein
MT0808	108.282	117.748	51.7932	39.3745	0.403435	-1.30959	6.51451	10.1647	0.00143151	0.0236022	Rv0784	Rv0784	conserved hypothetical protein
MT0809	89.9832	104.441	172.488	148.081	1.64898	0.721573	6.74112	5.47613	0.0192779	0.127276	Rv0785	Rv0785	putative dehydrogenases
MT0810	47.6347	27.3058	47.7828	40.9358	1.18314	0.242626	5.34643	0.465129	0.495236	0.74735	Rv0786c	Rv0786c	conserved hypothetical protein
MT0811	11.9087	12.4747	18.6012	20.5899	1.60705	0.684417	3.90951	4.80568	0.0283661	0.159409	Rv0787	Rv0787	hypothetical protein
MT0812	160.738	217.823	271.168	271.377	1.43327	0.519312	7.66885	2.20236	0.1378	0.402504
MT0813	98.1159	105.411	137.034	153.253	1.42628	0.51226	6.82797	2.83309	0.0923408	0.327015	Rv0788	purQ	phosphoribosylformylglycinamidine synthase I
MT0814	22.2489	19.9596	19.7104	30.5433	1.18968	0.250569	4.76674	0.54347	0.460998	0.725881	Rv0789c	Rv0789c	hypothetical protein
MT0815	82.7799	65.6309	45.7777	44.6928	0.609514	-0.714269	5.98897	5.69142	0.017048	0.118504	Rv0790c	Rv0790c	hypothetical protein
MT0816	104.157	73.2544	44.7111	52.7921	0.549426	-0.864004	6.21327	7.64913	0.00567997	0.0604578
MT0817	204.887	147.756	112.503	120.27	0.660015	-0.599428	7.26288	3.33955	0.0676331	0.272307
MT0818	5.57675	5.33641	6.78346	8.24572	1.37473	0.459143	2.59508	2.32959	0.126935	0.38721
MT0819	171.311	192.457	151.881	158.913	0.854403	-0.227011	7.32529	0.505612	0.477044	0.73675	Rv0798c	Rv0798c	similar to bacteriocins
MT0820	231.958	234.802	212.164	193.994	0.870183	-0.20061	7.64771	0.373478	0.541114	0.783114	Rv0799c	Rv0799c	conserved hypothetical protein
MT0821	139.825	72.6306	53.4997	61.6233	0.541731	-0.88435	6.58259	5.44294	0.0196476	0.128515	Rv0800	pepC	aminopeptidase I
MT0822	26.6638	26.1276	34.1306	34.3002	1.2961	0.37418	4.84446	1.68455	0.19432	0.476048	Rv0802c	Rv0802c	acetyltransferase
MT0823	292.721	325.59	436.061	439.121	1.41546	0.501267	8.37758	2.27425	0.131539	0.392945	Rv0803	purL	phosphoribosylformylglycinamidine synthase II
MT0824	20.2157	21.4843	32.4667	38.5939	1.7039	0.768842	4.77189	6.94415	0.00840939	0.0780313	Rv0804	Rv0804	conserved hypothetical protein
MT0825	1276.73	1531.55	1767.15	1332.1	1.10362	0.142246	10.6545	0.118506	0.73066	0.881261	Rv0805	Rv0805	conserved hypothetical protein
MT0826	83.6512	152.469	150.132	191.554	1.44729	0.533351	7.1401	1.79671	0.180111	0.460081	Rv0806c	cpsY	probable UDP-glucose-4-epimerase
MT0828	23.9335	13.5836	9.38591	11.0756	0.544681	-0.876516	4.11207	5.35726	0.0206361	0.132795	Rv0807	Rv0807	conserved hypothetical protein
MT0829	863.06	756.384	496.216	418.531	0.564857	-0.824043	9.33654	4.38395	0.0362789	0.185666	Rv0808	purF	amidophosphoribosyltransferase
MT0830	332.746	252.197	286.996	237.174	0.896083	-0.158295	8.1142	0.198546	0.655897	0.849047	Rv0809	purM	5'-phosphoribosyl-5-aminoimidazole synthase
MT0831	540.248	559.699	474.415	411.798	0.805699	-0.311687	8.86975	0.796842	0.372039	0.651982	Rv0810c	Rv0810c	hypothetical protein
MT0832	468.563	256.286	269.376	209.9	0.661189	-0.596866	8.20957	2.13497	0.143974	0.412387	Rv0811c	Rv0811c	conserved hypothetical protein
MT0833	46.3567	34.9985	64.6775	57.4273	1.50026	0.58521	5.75461	3.74312	0.0530254	0.238236
MT0834	48.7966	38.741	38.9089	46.2541	0.972384	-0.0404024	5.5982	0.019105	0.890066	0.949308	Rv0813c	Rv0813c	conserved hypothetical protein
MT0835	3.42738	4.29685	5.58889	7.31869	1.67158	0.741212	2.95684	2.84606	0.0915981	0.325737
MT0836	23.0041	39.2261	33.32	50.3038	1.34425	0.426798	5.71446	1.09031	0.296404	0.583161	Rv0814c	sseC2	thiosulfate sulfurtransferase
MT0837	503.127	939.208	746.01	939.817	1.16884	0.225078	9.65295	0.263191	0.607936	0.823656	Rv0815c	cysA2	thiosulfate sulfurtransferase
MT0838	4.87966	5.89084	4.94894	6.19649	1.03544	0.0502474	2.68413	0.0261968	0.871421	0.941757	Rv0816c	thiX	equivalent to M. leprae ThiX
MT0839	44.8464	52.3938	44.8391	48.4497	0.959516	-0.059622	5.63121	0.0408695	0.83979	0.928572	Rv0817c	Rv0817c	probable exported protein
MT0840	250.779	254.484	191.771	186.529	0.74873	-0.417483	7.91527	1.558	0.211958	0.493126	Rv0818	Rv0818	two-component response regulator
MT0841	88.1242	97.2336	86.0518	94.5574	0.974413	-0.0373952	6.81146	0.0149471	0.902694	0.955371	Rv0819	Rv0819	conserved hypothetical protein
MT0842	51.9335	85.4519	69.7117	67.2831	0.997578	-0.00349881	6.19087	0.000119772	0.991268	0.994449	Rv0820	phoT	phosphate transport system ABC transporter
MT0843	429.352	324.689	316.049	256.544	0.759359	-0.397146	8.32194	1.23363	0.266702	0.551165	Rv0821c	phoY2	phosphate transport system regulator
MT0844	659.625	402.518	425.139	338.416	0.718871	-0.476195	8.85346	1.32983	0.248836	0.532877	Rv0822c	Rv0822c	conserved hypothetical protein
MT0845	3630	2211.77	1052.08	521.334	0.269341	-1.8925	10.8332	8.63431	0.00329889	0.0429097	Rv0823c	Rv0823c	transcriptional regulator (NifR3/Smm1 family)
MT0846	13685	10145	4162.1	2102.41	0.262884	-1.9275	12.7027	8.54242	0.00346965	0.0440889	Rv0824c	desA1	acyl-[ACP] desaturase
MT0847	29.5103	41.721	47.5269	40.7407	1.23993	0.310262	5.19783	0.933847	0.333865	0.618154	Rv0825c	Rv0825c	conserved hypothetical protein
MT0848	845.11	777.245	734.064	699.618	0.883703	-0.178367	9.84459	0.223688	0.636244	0.83871	Rv0826	Rv0826	conserved hypothetical protein
MT0849	102.357	83.0955	127.222	58.0128	0.998878	-0.00162005	6.40589	1.04697e-05	0.997418	0.998419	Rv0827c	Rv0827c	transcriptional regulator (ArsR family)
MT0850	2.90456	4.22755	3.02909	4.24484	1.02214	0.0315898	1.91465	0.00810778	0.928253	0.969563	Rv0829	Rv0829	probable transposase fragment, highly similarsim
MT0851	43.0455	54.9581	49.1054	62.2088	1.13598	0.183936	6.40908	0.348085	0.555199	0.791725	Rv0830	Rv0830	conserved hypothetical protein
MT0852	1020.31	1254.89	1024.43	852.09	0.824782	-0.277916	9.96488	0.531075	0.466155	0.731404	Rv0831c	Rv0831c	conserved hypothetical protein
MT0854	15.9751	15.9399	16.852	16.5402	1.0463	0.065298	4.34774	0.0472679	0.827887	0.923601	Rv0832	PE_PGRS	PE_PGRS-family protein
MT0854.1	9.41076	10.257	11.3058	10.978	1.13359	0.180905	3.35409	0.330075	0.565615	0.797314
MT0855	344.597	202.992	149.961	122.271	0.497144	-1.00827	8.0234	4.95644	0.0259936	0.151205	Rv0834c	PE_PGRS	PE_PGRS-family protein
MT0856	94.9209	98.481	61.819	50.255	0.579609	-0.786847	6.58165	7.18665	0.00734479	0.0721815	Rv0835	lpqQ	lipoprotein
MT0856.1	15.278	17.1181	17.5346	15.8572	1.03131	0.0444799	3.93225	0.0188794	0.890713	0.949377
MT0857	10.2821	8.80161	8.40466	8.24572	0.871987	-0.197621	3.13768	0.303866	0.581469	0.805753	Rv0836c	Rv0836c	hypothetical protein
MT0858	26.6057	20.7912	25.8966	18.1991	0.9303	-0.104232	4.41807	0.0845437	0.771232	0.902412	Rv0837c	Rv0837c	hypothetical protein
MT0860	28.2904	19.9596	34.9839	28.982	1.32483	0.405807	4.94312	1.57523	0.209449	0.489574	Rv0838	lpqR	lipoprotein
MT0861	68.7218	90.3725	122.444	85.775	1.30917	0.388654	6.22685	1.57837	0.208996	0.489086	Rv0839	Rv0839	conserved hypothetical protein
MT0862	23.3526	27.9295	48.7214	35.9104	1.65131	0.72361	4.80212	5.72158	0.0167576	0.117704
MT0864	29.336	22.7317	24.4034	19.858	0.849887	-0.234657	4.62687	0.535035	0.464498	0.729664	Rv0842	Rv0842	Unknown integral membrane protein
MT0865	20.9128	15.3855	14.1642	13.6615	0.76606	-0.384471	4.02871	1.30579	0.253159	0.538154	Rv0843	Rv0843	similar to various dehydrogenases
MT0866	143.717	82.2639	89.2089	61.3794	0.66635	-0.585649	6.68013	1.7796	0.182199	0.46239	Rv0844c	narL	two-component response regulator
MT0867	33.3443	48.5821	46.0763	51.0356	1.1859	0.245985	5.36712	0.638575	0.424227	0.698007	Rv0845	Rv0845	sensor histidine kinase
MT0868	4.18256	4.50476	11.3484	7.75781	2.20212	1.13889	2.60684	11.4923	0.00069887	0.0148324
MT0869	172.473	184.834	420.66	195.458	1.72441	0.786102	7.71179	3.42669	0.0641506	0.26497	Rv0846c	Rv0846c	similar to several L-ascorbate oxidases
MT0870	297.485	164.389	316.903	143.397	0.996569	-0.00495812	7.85326	0.000141278	0.990517	0.994246	Rv0847	lpqS	lipoprotein
MT0873	19.112	16.0092	43.4739	18.1503	1.75467	0.811203	4.36745	4.24156	0.0394458	0.195029	Rv0850	Rv0850	transposase fragment
MT0874	31.3692	25.0188	37.2024	31.4216	1.21658	0.282834	4.91904	0.792739	0.373273	0.653228	Rv0851c	Rv0851c	Short-chain dehydrogenases/reductase
MT0875	15.7427	18.4349	18.2172	15.5644	0.989331	-0.0154746	4.11919	0.00265868	0.958877	0.982769	Rv0852	fadD16	acyl-CoA synthase
MT0876	176.423	171.25	185.713	187.554	1.0736	0.102455	7.51821	0.105884	0.74488	0.889184	Rv0853c	pdc	pyruvate (or indolepyruvate) decarboxylase
MT0877	68.7799	81.0857	44.3698	51.6699	0.640889	-0.641854	6.11094	4.84272	0.027763	0.157574	Rv0854	Rv0854	conserved hypothetical protein
MT0878	68.838	58.6312	44.2845	45.4246	0.703665	-0.507039	6.03228	2.96436	0.0851182	0.312225	Rv0855	far	fatty acyl-CoA racemase
MT0879	144.473	147.618	128.672	81.9693	0.721261	-0.471407	7.16413	2.07029	0.150193	0.421724	Rv0856	Rv0856	conserved hypothetical protein
MT0880	111.128	68.611	82.3401	65.8682	0.824457	-0.278484	6.43006	0.572208	0.449383	0.717674	Rv0857	Rv0857	conserved hypothetical protein
MT0881	47.17	60.0173	54.8649	62.7943	1.09788	0.134714	5.91303	0.1672	0.682612	0.861089	Rv0858c	Rv0858c	possible aminotransferase
MT0882	559.185	891.874	370.061	575.541	0.651669	-0.617788	10.0534	2.00676	0.156599	0.430621	Rv0859	fadA	[beta] oxidation complex, subunit (acetyl-CoA
MT0883	1057.2	1558.58	706.119	1019.44	0.659678	-0.600167	10.8455	1.78817	0.181149	0.460949	Rv0860	fadB	hypothetical protein
MT0884	164.863	124.817	138.741	133.054	0.938173	-0.0920741	7.0706	0.0804226	0.776726	0.90514	Rv0861c	Rv0861c	probable DNA helicase
MT0885	130.937	68.4031	64.6348	56.8418	0.609277	-0.71483	6.56375	3.87566	0.0489909	0.227295	Rv0862c	Rv0862c	conserved hypothetical protein
MT0886	386.248	317.62	255.34	206.436	0.656058	-0.608105	8.18488	2.70636	0.0999487	0.339837	Rv0863	Rv0863	conserved hypothetical protein
MT0887	544.662	524.424	408.927	369.545	0.728171	-0.45765	8.87588	1.4381	0.230447	0.514208
MT0888	112.058	97.7187	86.8624	54.695	0.674878	-0.5673	6.52235	2.15345	0.14225	0.408622	Rv0865	mog	molybdopterin biosynthesis
MT0889	63.6098	52.1166	53.4144	34.0075	0.755504	-0.404488	5.81964	1.04443	0.306794	0.593076
MT0890	351.219	834.698	722.417	794.663	1.27929	0.355343	9.33261	0.595475	0.44031	0.710407	Rv0867c	Rv0867c	probable exported protein
MT0891	87.1948	69.304	79.567	62.7943	0.909606	-0.136686	6.45512	0.205678	0.650176	0.845293	Rv0868c	moaD2	molybdopterin converting factor subunit 1
MT0892	177.875	127.312	98.1255	108.902	0.678278	-0.560051	7.29943	2.85027	0.0913588	0.325427	Rv0869c	moaA2	molybdenum cofactor biosynthesis, protein A
MT0892.1	229.46	219.902	159.433	141.348	0.66937	-0.579125	7.61673	3.26057	0.0709646	0.280901	Rv0870c	Rv0870c	unknown hydrophobic protein
MT0893	88.0662	173.884	142.751	176.185	1.21774	0.2842	7.15355	0.526737	0.467982	0.732659	Rv0871	cspB	probable cold shock protein
MT0894	1243.15	646.537	302.738	211.168	0.271959	-1.87854	9.40083	16.5603	4.71264e-05	0.00219534	Rv0872c	PE_PGRS	PE_PGRS-family protein
MT0896	910.985	964.851	591.27	698.495	0.687568	-0.540426	9.63643	2.20359	0.13769	0.402504	Rv0873	fadE10	acyl-CoA dehydrogenase
MT0897	141.336	75.8879	54.225	29.5187	0.385574	-1.37492	6.43021	7.87009	0.00502591	0.055859
MT0898	242.879	115.461	87.1184	55.1829	0.397129	-1.33232	7.14003	6.40893	0.0113548	0.0933444	Rv0875c	Rv0875c	possible exported protein
MT0899	1026.99	485.752	335.162	255.959	0.390762	-1.35564	9.11341	6.27059	0.0122758	0.0983882	Rv0876c	Rv0876c	possible membrane protein
MT0900	358.364	256.633	184.177	225.22	0.665647	-0.587171	8.17567	2.75299	0.0970725	0.334762	Rv0877	Rv0877	conserved hypothetical protein
MT0901	12.141	16.0092	12.2444	14.9301	0.965973	-0.0499458	3.96143	0.0244304	0.875795	0.943182	Rv0878c	PPE	PPE-family protein
MT0902	30.2655	17.9497	17.4493	16.0523	0.694477	-0.526002	5.16903	1.60476	0.20523	0.485685	Rv0879c	Rv0879c	hypothetical protein
MT0904	16.1493	26.7514	29.267	34.0075	1.47643	0.562108	4.64905	3.00704	0.0829036	0.308047	Rv0881	Rv0881	possible rRNA methyltransferase
MT0905	3.54356	2.70286	5.50356	5.22066	1.70977	0.773805	2.37593	4.74008	0.0294676	0.163073	Rv0882	Rv0882	unknown hydrophobic protein
MT0906	449.161	375.766	297.704	370.277	0.809719	-0.304506	8.67001	0.71624	0.39738	0.674581	Rv0883c	Rv0883c	conserved hypothetical protein
MT0907	391.36	316.442	327.483	354.859	0.963995	-0.0529017	8.6076	0.0233381	0.878581	0.944548	Rv0884c	serC	phosphoserine aminotransferase
MT0908	1440.72	968.385	253.377	252.446	0.209965	-2.25178	11.0139	24.472	7.53976e-07	8.35657e-05	Rv0885	Rv0885	unknown transmembrane protein
MT0909	123.095	90.5111	33.9173	40.7407	0.349457	-1.51681	7.93439	18.2277	1.96012e-05	0.00110153	Rv0886	fprB	ferredoxin, ferredoxin-NADP reductase
MT0910	29.336	33.1966	73.0395	60.1596	2.13065	1.0913	5.18732	13.7098	0.000213344	0.00639532	Rv0887c	Rv0887c	hypothetical protein
MT0910.2	1.74273	2.70286	8.362	8.78242	3.87769	1.9552	2.08854	30.7641	2.91378e-08	4.84417e-06
MT0910.3	4.87966	3.74242	7.97803	3.75693	1.36113	0.444808	2.292	1.29409	0.255295	0.540099
MT0910.4	2.78837	4.08894	12.7136	9.4655	3.24031	1.69613	2.41444	25.4275	4.59328e-07	5.39034e-05
MT0911	171.311	294.542	35.6238	34.3978	0.15034	-2.7337	7.4632	24.0492	9.39063e-07	9.36715e-05	Rv0888	Rv0888	possible membrane protein
MT0912	375.094	156.073	94.1578	81.0422	0.329837	-1.60017	7.67377	10.4622	0.00121842	0.0211369	Rv0889c	citA	citrate synthase 2
MT0914	93.5848	130.846	305.981	277.769	2.60132	1.37924	7.35694	14.9956	0.000107762	0.00383903	Rv0890c	Rv0890c	transcriptional regulator (LuxR/UhpA family)
MT0915	101.543	166.26	424.201	339.929	2.85365	1.51281	7.64028	13.946	0.00018814	0.00586469	Rv0891c	Rv0891c	putative transcriptional regulator
MT0915.1	2.90456	8.10857	18.3879	16.0523	3.14096	1.65121	3.304	13.6834	0.000216355	0.00639532
MT0916	100.207	144.845	464.688	387.207	3.47673	1.79773	7.6253	22.4469	2.16034e-06	0.000187386	Rv0892	Rv0892	putative monooxygenase
MT0917	13.0124	21.5536	37.117	31.8607	1.99843	0.998866	4.58951	8.96815	0.00274727	0.0383272	Rv0893c	Rv0893c	conserved hypothetical protein
MT0918	3.71783	5.47502	6.57014	6.63561	1.44241	0.52848	2.4144	2.7952	0.094547	0.331205	Rv0894	Rv0894	putative transcriptional regulator
MT0919	7.95849	8.24718	9.85521	10.978	1.28519	0.361978	3.31114	1.53911	0.214751	0.49621	Rv0895	Rv0895	conserved hypothetical protein
MT0920	2490.08	2800.78	1164.75	1334.29	0.472333	-1.08212	10.9472	6.45404	0.01107	0.091448	Rv0896	gltA2	citrate synthase 1
MT0921	232.887	139.717	163.528	104.267	0.718701	-0.476537	7.37404	1.2586	0.261917	0.547146	Rv0897c	Rv0897c	possible oxidoreductase
MT0921.1	200.531	119.757	129.952	109.731	0.748268	-0.418373	7.11543	1.34736	0.24574	0.529715	Rv0898c	Rv0898c	hypothetical protein
MT0922	86.4396	90.3725	137.205	115.489	1.42926	0.515264	6.57812	3.03361	0.0815562	0.305262	Rv0899	ompA	member of OmpA family
MT0923	20.0414	22.3852	27.5178	25.3227	1.24592	0.317206	4.39653	1.07083	0.300758	0.587958	Rv0900	Rv0900	hypothetical protein
MT0924	27.6514	32.1571	43.9431	49.5231	1.56301	0.644325	5.31268	4.63021	0.0314137	0.170531	Rv0901	Rv0901	conserved hypothetical protein
MT0925	544.372	240.208	266.603	175.307	0.563238	-0.828184	8.40476	2.75407	0.0970074	0.334762	Rv0902c	Rv0902c	sensor histidine kinase
MT0926	365.393	192.457	171.08	120.173	0.522096	-0.937614	7.87337	3.91275	0.0479211	0.224419	Rv0903c	Rv0903c	two-component response regulator
MT0927	39.7343	40.4043	35.8371	33.7635	0.868609	-0.203222	5.25297	0.508832	0.475645	0.735305	Rv0904c	accD3	acetyl/propionyl CoA carboxylase [beta] subunit
MT0928	372.829	266.127	269.674	272.304	0.848193	-0.237536	8.43227	0.369399	0.543332	0.784049	Rv0905	echA6	enoyl-CoA hydratase/isomerase superfamily (aka
MT0929	308.638	191.487	201.968	144.227	0.692205	-0.53073	8.0382	1.62072	0.202991	0.484294	Rv0906	Rv0906	probable membrane protein
MT0930	179.153	153.439	201.755	154.571	1.07135	0.0994279	7.5279	0.0871066	0.767888	0.90081	Rv0907	Rv0907	probable penicillin binding protein
MT0931	185.427	135.836	203.248	151.35	1.10371	0.142358	7.53841	0.159658	0.689472	0.865092
MT0933	54.9542	57.9382	57.6807	55.622	1.00373	0.0053673	5.86737	0.000355627	0.984954	0.991415	Rv0909	Rv0909	hypothetical protein
MT0934	122.63	135.212	121.292	114.903	0.916104	-0.126417	6.91513	0.167808	0.682067	0.861089	Rv0910	Rv0910	conserved hypothetical protein
MT0934.1	41.6513	51.1464	78.4577	63.3798	1.52896	0.612551	5.75926	3.96231	0.0465297	0.220002	Rv0911	Rv0911	conserved hypothetical protein
MT0936	21.3194	18.5735	25.1287	24.4932	1.24341	0.314307	4.44507	0.841696	0.358912	0.642737	Rv0912	Rv0912	conserved hypothetical protein
MT0937	44.4978	42.5527	42.4499	37.1789	0.914808	-0.128459	5.4504	0.20261	0.652623	0.847198
MT0938	365.858	236.535	161.054	138.128	0.49665	-1.0097	7.88012	6.27786	0.0122256	0.0983467	Rv0913c	Rv0913c	probable dioxygenase
MT0939	182.348	83.5114	94.7551	79.1394	0.654001	-0.612635	6.89861	2.16627	0.141068	0.406987	Rv0914c	Rv0914c	lipid transfer protein
MT0940	22.4813	15.8706	11.1351	9.66067	0.542121	-0.883314	4.1383	5.97112	0.014542	0.109263	Rv0915c	PPE	PPE-family protein
MT0941	19.112	11.9203	7.97803	7.61143	0.502099	-0.993957	3.83003	5.71253	0.0168443	0.117704	Rv0916c	PE	PE-family protein
MT0942	46.7634	70.4822	65.4028	53.6704	1.01609	0.0230268	5.85971	0.00517712	0.94264	0.975508	Rv0917	betP	glycine betaine transport
MT0943	1.68464	2.84147	2.34648	2.53714	1.08881	0.122748	1.15651	0.125171	0.723493	0.879381
MT0944	28.3485	21.8308	17.0226	18.8334	0.714038	-0.485927	4.61128	2.49013	0.114562	0.365683	Rv0918	Rv0918	conserved hypothetical protein
MT0945	20.2157	17.7418	17.8759	16.6866	0.91031	-0.13557	4.31081	0.207252	0.64893	0.844249	Rv0919	Rv0919	conserved hypothetical protein
MT0946	6.09957	8.663	11.8604	10.4901	1.51754	0.601732	3.07894	3.14336	0.0762364	0.293126
MT0947	87.311	144.915	241.389	221.268	1.99259	0.994645	7.09995	6.91533	0.00854599	0.0787494	Rv0920c	Rv0920c	probable transposase, related to IS1081
MT0948	56.0579	57.9382	53.6704	60.6475	1.00278	0.004006	5.80666	0.000192051	0.988943	0.993542	Rv0921	Rv0921	resolvase
MT0949	733.575	657.765	675.914	731.234	1.01135	0.0162853	9.45301	0.00208247	0.963602	0.986092	Rv0922	Rv0922	transposase
MT0950	55.3028	48.3742	51.4519	51.9627	0.99728	-0.00392953	5.70192	0.000188011	0.98906	0.993542	Rv0923c	Rv0923c	hypothetical protein
MT0951	46.1244	77.4126	87.2037	116.611	1.65022	0.722662	6.12501	3.74228	0.0530519	0.238236	Rv0924c	nramp	transmembrane protein belonging to Nramp family
MT0952	308.173	472.446	481.497	565.881	1.34177	0.424139	8.51309	1.22819	0.267759	0.552409	Rv0925c	Rv0925c	hypothetical protein
MT0953	134.365	163.696	159.433	149.057	1.03508	0.0497437	7.12605	0.0245553	0.87548	0.943182	Rv0926c	Rv0926c	conserved hypothetical protein
MT0954	77.784	85.1747	76.5379	82.0669	0.973326	-0.0390043	6.27133	0.0181261	0.892902	0.950555	Rv0927c	Rv0927c	short-chain alcohol dehydrogenase family
MT0955	486.571	735.177	554.366	377.205	0.762523	-0.391147	8.96122	0.93119	0.334554	0.618635
MT0956	109.908	149.974	116.684	96.7042	0.82126	-0.284088	6.91266	0.789421	0.374275	0.653641	Rv0929	pstC2	membrane-bound component of phosphate transport
MT0957	129.253	145.608	134.987	110.756	0.894159	-0.161396	6.99367	0.262623	0.608324	0.823729	Rv0930	pstA1	PstA component of phosphate uptake
MT0958	2587.61	2152.1	2640.68	2010.88	0.981403	-0.0270825	11.1672	0.00373175	0.951289	0.979521	Rv0931c	pknD	serine-threonine protein kinase
MT0959	2277.17	2416.42	2537.44	1901.15	0.945672	-0.0805878	11.1143	0.0337788	0.854178	0.933761	Rv0932c	pstS	PstS component of phosphate uptake
MT0960	110.373	166.953	166.685	196.58	1.31003	0.389599	7.30121	1.29845	0.254497	0.538982	Rv0933	pstB	ABC transport component of phosphate uptake
MT0961	161.087	199.041	255.041	329.194	1.62233	0.698067	7.8302	3.75667	0.0525972	0.237401	Rv0934	phoS1	PstS component of phosphate uptake
MT0962	127.917	133.202	167.88	176.088	1.31728	0.397561	7.23571	1.50558	0.219814	0.502935	Rv0935	pstC	PstC component of phosphate uptake
MT0963	24.5145	23.9792	36.5624	36.3983	1.50433	0.589121	5.05037	3.90409	0.0481688	0.225051	Rv0936	pstA2	PstA component of phosphate uptake
MT0964	74.3566	77.1354	116.471	100.266	1.43077	0.516787	6.37866	3.09425	0.0785695	0.29828	Rv0937c	Rv0937c	conserved hypothetical protein
MT0965	433.418	299.186	392.886	253.714	0.8826	-0.180168	8.3721	0.181517	0.670073	0.856645	Rv0938	Rv0938	conserved hypothetical protein
MT0966	245.319	173.676	295.315	217.95	1.22494	0.292714	7.84908	0.526384	0.468131	0.732659	Rv0939	Rv0939	probable dehydrase
MT0967	150.746	143.321	145.524	111.976	0.875688	-0.191512	6.94962	0.297029	0.585751	0.80799	Rv0940c	Rv0940c	probable monooxygenase
MT0968	128.556	113.659	143.519	112.757	1.05805	0.0814097	6.72231	0.0615945	0.803993	0.917254
MT0968.1	81.0952	64.3141	93.9445	72.4062	1.1439	0.193962	6.02732	0.401126	0.526508	0.772909
MT0969	1.91701	1.38608	3.75437	2.82989	1.98036	0.98576	1.24514	7.89005	0.00497076	0.0554003	Rv0943c	Rv0943c	probable monooxygenase
MT0970	16.2074	28.4147	36.7331	33.666	1.57953	0.659498	4.74404	3.69945	0.0544304	0.241308	Rv0944	Rv0944	possible formamidopyrimidine-DNA glycosylase
MT0971	106.423	89.6101	154.868	111.39	1.35818	0.441673	6.69742	1.79644	0.180144	0.460081	Rv0945	Rv0945	ketoacyl reductase
MT0972	194.78	155.241	154.996	150.619	0.873083	-0.195809	7.32421	0.336917	0.561614	0.795536	Rv0946c	pgi	glucose-6-phosphate isomerase
MT0974	3.42738	7.48484	7.72205	8.88001	1.52895	0.612541	2.50691	2.81338	0.0934814	0.328165
MT0975	128.207	191.348	264.086	292.406	1.74162	0.800426	7.6072	5.20833	0.0224789	0.138465	Rv0948c	Rv0948c	hypothetical protein
MT0976	428.132	303.898	322.875	229.709	0.754863	-0.405713	8.21049	1.0596	0.303307	0.590052	Rv0949	uvrD	DNA-dependent ATPase I and helicase II
MT0977	163.527	282.414	164.467	171.989	0.754569	-0.406275	7.71487	1.26337	0.261015	0.546064	Rv0950c	Rv0950c	conserved hypothetical protein
MT0978	854.056	1045.45	707.527	881.219	0.836402	-0.257731	9.67624	0.458715	0.498225	0.749875	Rv0951	sucC	succinyl-CoA synthase [beta] chain
MT0979	578.53	817.857	535.125	679.76	0.870031	-0.200862	9.31748	0.263207	0.607925	0.823656	Rv0952	sucD	succinyl-CoA synthase [alpha] chain
MT0980	17.195	14.9004	7.72205	11.3196	0.592329	-0.755529	3.87559	5.96423	0.014599	0.109287	Rv0953c	Rv0953c	similar to alkanal monooxygenase beta chains
MT0981	603.044	661.299	492.675	589.593	0.855993	-0.22433	9.23406	0.402934	0.525578	0.772661	Rv0954	Rv0954	cell envelope antigen
MT0982	133.842	105.065	118.732	128.223	1.03354	0.0475966	7.05552	0.0230949	0.87921	0.944548	Rv0955	Rv0955	possible membrane protein
MT0983	59.7758	64.1062	70.1384	59.7205	1.04841	0.0682088	5.87868	0.052985	0.817948	0.921925	Rv0956	purN	phosphoribosylglycinamide formyltransferase I
MT0984	222.082	265.712	237.037	265.961	1.03119	0.0443137	7.90291	0.0164947	0.897807	0.953995	Rv0957	purH	phosphoribosylaminoimidazolecarboxamide
MT0985	202.273	138.955	124.065	125.393	0.730979	-0.452099	7.31905	1.96554	0.160922	0.435308	Rv0958	Rv0958	similar to magnesium-chelatase subunit
MT0986	127.336	68.4031	62.3737	69.2836	0.672406	-0.572596	6.75793	2.74134	0.0977827	0.335187	Rv0959	Rv0959	hypothetical protein
MT0987	3.77592	5.05919	6.2715	5.22066	1.30643	0.385625	2.46358	1.4895	0.222294	0.50481
MT0988	13.1286	12.8906	17.7479	16.5402	1.31774	0.398068	4.02528	1.93271	0.164462	0.43952	Rv0960	Rv0960	conserved hypothetical protein
MT0989	36.6555	33.3352	39.2075	28.2013	0.963254	-0.0540119	5.24462	0.0270612	0.869335	0.940013	Rv0961	Rv0961	hypothetical protein
MT0990	4.18256	5.33641	14.1215	7.8066	2.31063	1.20829	2.71453	11.8854	0.000565758	0.0131243	Rv0962c	Rv0962c	hypothetical protein
MT0992	6.09957	12.544	19.5824	17.8088	2.01083	1.00779	3.43768	6.73182	0.00947077	0.0842616	Rv0963c	Rv0963c	conserved hypothetical protein
MT0992.1	3.71783	3.67311	4.65029	5.26945	1.3401	0.422344	2.21081	1.87042	0.171427	0.450291	Rv0964c	Rv0964c	hypothetical protein
MT0993	32.5891	26.9593	20.9477	25.6642	0.782254	-0.354291	4.87325	1.35312	0.244733	0.528973	Rv0965c	Rv0965c	conserved hypothetical protein
MT0994	214.937	139.301	84.0893	84.5552	0.476032	-1.07087	7.20941	10.3582	0.00128903	0.0217823	Rv0966c	Rv0966c	conserved hypothetical protein
MT0995	351.103	227.04	268.394	99.095	0.635668	-0.653654	7.68186	2.05846	0.151363	0.422742	Rv0967	Rv0967	conserved hypothetical protein
MT0996	187.053	126.688	141.855	68.4541	0.670364	-0.576983	6.98645	1.69823	0.19252	0.474232	Rv0968	Rv0968	conserved hypothetical protein
MT0997	440.273	267.721	343.866	129.638	0.668815	-0.580321	8.25665	1.49458	0.221508	0.503948	Rv0969	ctpV	cation transport ATPase
MT0998	79.5849	66.1854	107.597	57.4273	1.13215	0.179071	6.20868	0.26359	0.607664	0.823656	Rv0970	Rv0970	hypothetical protein
MT0999.1	24.2821	21.5536	29.2243	28.1038	1.25048	0.322481	5.36075	0.59745	0.439553	0.710047	Rv0971c	echA7	enoyl-CoA hydratase/isomerase superfamily
MT1000	252.929	230.575	218.777	159.255	0.781875	-0.354991	8.34268	0.490049	0.483905	0.741122	Rv0972c	fadE12	acyl-CoA dehydrogenase
MT1001	247.236	174.438	151.839	81.1398	0.552532	-0.855869	8.12346	2.05946	0.151264	0.422742
MT1002	177.468	157.251	84.2173	39.0818	0.36842	-1.44058	7.64401	5.01848	0.0250782	0.148021	Rv0974c	accD2	acetyl/propionyl-CoA carboxylase, [beta] subunit
MT1003	118.099	85.4519	46.8442	19.4189	0.325625	-1.61871	6.84571	6.13597	0.0132459	0.103023	Rv0975c	fadE13	acyl-CoA dehydrogenase
MT1003.1	247.642	208.536	82.2547	39.0818	0.266028	-1.91035	8.04669	9.09247	0.00256663	0.0372395	Rv0976c	Rv0976c	hypothetical protein
MT1006.1	1.68464	2.21773	2.98643	3.51297	1.67019	0.740016	1.38925	4.29678	0.0381846	0.190684
MT1007	44.2654	63.4132	88.6116	105.535	1.80352	0.850818	6.13246	7.22579	0.00718637	0.0715053
MT1008	13.6514	15.1776	16.6813	16.2963	1.14443	0.194634	3.86398	0.419712	0.517081	0.763848	Rv0980c	PE_PGRS	PE_PGRS-family protein
MT1009	233.643	158.429	86.2651	80.8471	0.426212	-1.23036	7.38217	13.4947	0.000239236	0.00696752	Rv0981	Rv0981	two-component response regulator
MT1010	695.932	466.555	397.621	249.958	0.55707	-0.84407	9.03082	3.38928	0.0656216	0.268263	Rv0982	Rv0982	sensor histidine kinase
MT1011	490.173	565.036	540.159	483.521	0.97014	-0.0437358	9.11768	0.015552	0.900755	0.955183
MT1012	162.655	165.013	155.166	176.673	1.01271	0.0182216	7.67429	0.00318807	0.954973	0.980787	Rv0984	moaB2	molybdenum cofactor biosynthesis, protein B
MT1013	54.838	78.1056	59.6859	60.1108	0.901399	-0.149762	5.85154	0.230968	0.630807	0.836273	Rv0985c	mscL	highly similar to large-conductance mechanosensitive
MT1014	68.9542	110.54	106.445	107.194	1.19049	0.251554	6.64248	0.485085	0.486128	0.742308	Rv0986	Rv0986	Probable ABC transporter
MT1015	238.522	355.946	280.212	259.325	0.907662	-0.139773	8.18125	0.154794	0.693995	0.867766	Rv0987	Rv0987	potential integral membrane protein
MT1017	67.0372	98.4117	84.1746	90.459	1.05575	0.0782649	6.43666	0.0574303	0.810605	0.919353	Rv0988	Rv0988	conserved hypothetical protein
MT1018	95.1533	98.3424	202.394	188.09	2.01806	1.01297	6.96926	10.722	0.00105867	0.0194744	Rv0989c	grcC2	heptaprenyl diphosphate synthase II
MT1019	58.0911	78.5908	85.0705	85.1407	1.24562	0.316866	6.32194	1.05723	0.303847	0.59021	Rv0990c	Rv0990c	hypothetical protein
MT1020	311.368	465.238	393.057	369.838	0.982391	-0.0256304	8.63048	0.00493811	0.943977	0.976528
MT1021	28.8713	19.8903	15.1028	17.4673	0.667288	-0.583619	5.03148	3.23157	0.0722314	0.283386	Rv0992c	Rv0992c	conserved hypothetical protein
MT1022	57.1617	67.4328	48.2948	68.4053	0.936612	-0.0944765	5.88658	0.092042	0.761597	0.899311	Rv0993	galU	UTP-glucose-1-phosphate uridylyltransferase
MT1023	245.9	220.525	170.568	180.479	0.752614	-0.410019	7.68697	1.47735	0.22419	0.506809	Rv0994	moeA	molybdopterin biosynthesis
MT1024	28.7551	25.7811	29.395	37.1301	1.21915	0.28588	5.05662	0.925756	0.335968	0.619778	Rv0995	rimJ	acetylation of 30S S5 subunit
MT1025	1476.1	938.169	1168.5	674.832	0.763519	-0.389265	9.98845	0.660366	0.416431	0.691491	Rv0996	Rv0996	hypothetical protein
MT1025.1	6.09957	5.26711	6.86878	7.41627	1.25407	0.32662	2.59023	1.14581	0.284427	0.570571
MT1025.2	58.0911	44.0774	67.4506	77.5293	1.41837	0.504236	6.24065	2.89465	0.0888743	0.320913
MT1026	40.78	36.4539	60.5818	87.2387	1.91319	0.935983	6.02731	8.23707	0.00410433	0.0488844
MT1027	167.128	116.431	93.1765	76.7486	0.59924	-0.738795	6.9615	4.38745	0.0362045	0.185666	Rv0998	Rv0998	hypothetical protein
MT1028	72.6139	59.948	79.439	63.2822	1.07655	0.106419	6.08795	0.124439	0.724269	0.879692	Rv0999	Rv0999	hypothetical protein
MT1029	157.078	122.114	101.965	88.8001	0.683255	-0.549503	6.90305	2.57386	0.108643	0.354443
MT1030	303.12	201.467	194.672	131.834	0.647078	-0.627989	7.68335	2.67791	0.101749	0.339837	Rv1001	arcA	arginine deiminase
MT1031	152.78	117.955	125.259	125.637	0.926629	-0.109936	7.05639	0.114872	0.734665	0.883347
MT1032	16.4979	17.1181	17.6199	20.7851	1.14221	0.191826	4.22047	0.426509	0.513707	0.762581	Rv1003	Rv1003	conserved hypothetical protein
MT1033	42.3484	24.9495	23.5075	28.738	0.775702	-0.366426	5.21751	1.01759	0.313092	0.597339	Rv1004c	Rv1004c	possible exported protein
MT1034	61.4604	46.3644	69.8397	65.5754	1.25546	0.328221	5.94457	1.22524	0.268335	0.552454	Rv1005c	pabB	p-aminobenzoate synthase
MT1035	497.202	544.938	593.019	527.872	1.07558	0.105116	9.13167	0.0870453	0.767968	0.90081	Rv1006	Rv1006	hypothetical protein
MT1036	378.812	306.324	295.358	237.272	0.777404	-0.363263	8.17849	1.14319	0.28498	0.571105	Rv1007c	metS	methionyl-tRNA synthase
MT1037	4.76347	7.20762	7.5514	9.75825	1.44885	0.534908	2.93633	2.33655	0.126369	0.38637	Rv1008	Rv1008	conserved hypothetical protein
MT1038	102.647	177.349	138.272	171.989	1.10823	0.148258	7.31404	0.16244	0.68692	0.863791	Rv1009	Rv1009	conserved hypothetical protein
MT1039	37.1202	42.6913	51.0679	57.0857	1.35528	0.438587	5.6883	2.26269	0.132524	0.3949	Rv1010	ksgA	16S rRNA dimethyltransferase
MT1040	57.7426	48.2356	50.9399	49.084	0.943639	-0.0836929	5.83561	0.0786607	0.779121	0.906588	Rv1011	Rv1011	conserved hypothetical protein
MT1040.1	4.41493	6.7918	4.94894	5.07429	0.898	-0.155213	2.47397	0.224695	0.635486	0.83871
MT1041	462.057	488.663	502.146	264.351	0.806264	-0.310675	8.68422	0.680095	0.409554	0.685355	Rv1013	pks16	polyketide synthase
MT1042	14.8132	37.2163	24.6594	43.5218	1.31121	0.390899	4.8947	0.705277	0.401016	0.678277	Rv1014c	pth	peptidyl-tRNA hydrolase
MT1043	129.02	221.218	187.59	275.622	1.32265	0.403436	7.54472	1.05077	0.30533	0.591967	Rv1015c	rplY	50S ribosomal protein L25
MT1044	96.1408	150.32	117.964	122.222	0.974689	-0.0369864	6.8082	0.0105541	0.918175	0.963576	Rv1016c	lpqT	similar to M. kansasii Q49597
MT1045	311.833	469.673	344.036	484.936	1.06076	0.0850987	8.59526	0.0495727	0.823808	0.923468	Rv1017c	prsA	ribose-phosphate pyrophosphokinase
MT1046	242.879	253.237	267.712	338.27	1.22143	0.288571	8.13437	0.730395	0.392755	0.671791
MT1047	355.75	185.735	210.543	161.597	0.687239	-0.541116	7.84527	1.22101	0.269163	0.553587	Rv1019	Rv1019	transcriptional regulator (TetR/AcrR family)
MT1048	445.849	226.278	303.506	226.05	0.787852	-0.344003	8.35918	0.622742	0.43003	0.701767	Rv1020	mfd	transcription-repair coupling factor
MT1049	176.132	119.688	140.447	132.078	0.921157	-0.118482	7.12049	0.11136	0.738602	0.884725	Rv1021	Rv1021	conserved hypothetical protein
MT1050	88.4728	70.5515	112.802	97.1921	1.32031	0.400874	6.43393	1.84428	0.17445	0.454049	Rv1022	lpqU	lipoprotein
MT1051	167.941	253.445	275.263	371.399	1.53468	0.617937	7.92382	2.61835	0.105634	0.348332	Rv1023	eno	enolase
MT1052	45.9501	54.7502	77.7324	87.3851	1.63988	0.713589	5.96438	5.22896	0.0222138	0.137668	Rv1024	Rv1024	hypothetical protein
MT1053	33.6348	31.5333	44.4551	45.4734	1.37967	0.464321	5.25737	2.47315	0.115806	0.368767	Rv1025	Rv1025	hypothetical protein
MT1054	8.07467	6.44528	13.6096	13.2712	1.8472	0.885341	3.4931	8.75032	0.00309548	0.0414875
MT1054.1	35.9584	44.7704	151.668	62.16	2.64937	1.40565	5.8945	11.5451	0.000679283	0.014573
MT1056	30.3236	24.0485	31.3575	24.0053	1.01806	0.0258187	4.66207	0.00567087	0.939972	0.975166	Rv1027c	kdpE	two-component response regulator
MT1057	186.821	98.6196	101.923	66.844	0.591236	-0.758193	6.77951	3.03107	0.081684	0.305454	Rv1028c	kdpD	sensor histidine kinase
MT1057.1	1.51037	2.56425	2.38914	2.92747	1.31517	0.395252	1.23122	1.2776	0.258345	0.543669
MT1058	36.6555	46.503	62.1177	71.7719	1.61044	0.687452	5.51836	5.30988	0.0212048	0.135119	Rv1029	kdpA	potassium-transporting ATPase A chain
MT1059	39.6182	37.0084	45.2657	52.9873	1.28186	0.358236	5.37075	1.59815	0.206166	0.486171	Rv1030	kdpB	potassium-transporting ATPase B chain
MT1060	16.8464	16.2171	23.4221	19.4677	1.29731	0.375521	4.1026	1.6555	0.198211	0.479344	Rv1031	kdpC	potassium-transporting ATPase C chain
MT1061	55.5932	43.7308	50.2146	41.9117	0.927381	-0.108766	5.82925	0.13296	0.715383	0.878	Rv1032c	Rv1032c	sensor histidine kinase
MT1062	54.4314	45.8793	45.7777	34.6418	0.801747	-0.318781	5.68846	1.09719	0.294884	0.581317	Rv1033c	Rv1033c	two-component response regulator
MT1063	4.18256	2.84147	8.31933	3.80572	1.72307	0.784983	2.03278	4.0016	0.0454571	0.217214	Rv1034c	Rv1034c	hypothetical protein
MT1065	18.3568	16.3558	49.4894	41.9605	2.63311	1.39677	4.66753	22.4971	2.1046e-06	0.000187386	Rv1035c	Rv1035c	hypothetical protein
MT1066	308.58	701.911	205.893	389.403	0.589125	-0.763354	9.0129	2.06369	0.150844	0.422742	Rv1037c	Rv1037c	conserved hypothetical protein
MT1067	279.476	451.1	208.581	288.356	0.680214	-0.555939	8.40453	1.3759	0.2408	0.52598	Rv1038c	Rv1038c	conserved hypothetical protein
MT1068	11.6182	10.8807	15.5294	15.1741	1.36417	0.448023	3.76	1.51971	0.217664	0.499988	Rv1039c	PPE	PPE-family protein
MT1069	51.4107	25.1574	55.1636	30.5433	1.11916	0.162417	5.73303	0.0676559	0.794781	0.913094	Rv1040c	PE	PE-family protein
MT1070	2.55601	3.18799	4.47964	3.22022	1.34728	0.430049	1.65963	1.46859	0.225568	0.508484
MT1070.1	37.9916	34.5827	40.7861	26.2009	0.923267	-0.11518	5.03454	0.131153	0.717239	0.879381
MT1073	139.593	77.8977	118.049	67.3319	0.852322	-0.23053	6.69919	0.267476	0.60503	0.821951	Rv1043c	Rv1043c	hypothetical protein
MT1074	13.9419	15.2469	12.3297	13.4176	0.882271	-0.180707	3.99588	0.323583	0.569463	0.798352	Rv1044	Rv1044	conserved hypothetical protein
MT1075	23.0622	27.9295	22.6968	27.9086	0.992605	-0.0107084	4.77892	0.00119633	0.972408	0.988705	Rv1045	Rv1045	hypothetical protein
MT1075.1	570.571	647.715	1297.26	772.463	1.69891	0.764606	9.42003	3.92265	0.0476398	0.223627	Rv1046c	Rv1046c	hypothetical protein
MT1077	13.5933	15.1776	23.2941	16.589	1.38735	0.472336	3.93012	2.0955	0.147733	0.417757
MT1078	63.2032	58.7698	101.965	70.8449	1.41684	0.502681	6.21577	2.65158	0.103447	0.342819	Rv1048c	Rv1048c	hypothetical protein
MT1079	43.8007	44.216	31.5281	40.9358	0.823119	-0.280827	5.45102	0.90082	0.342562	0.625504	Rv1049	Rv1049	transcriptional regulator (MarR family)
MT1080	8.71367	6.72249	7.16743	7.56264	0.952185	-0.0706855	3.13443	0.051828	0.819912	0.922384	Rv1050	Rv1050	probable oxidoreductaseoxidoreducatse
MT1082	7.43566	6.02945	13.7802	11.6123	1.88348	0.9134	3.37157	5.12604	0.0235695	0.142954
MT1083	23.5269	27.5137	45.5217	40.7895	1.69159	0.758376	4.96905	5.61166	0.0178413	0.122016	Rv1052	Rv1052	hypothetical protein
MT1083.1	242.414	300.225	495.192	258.447	1.38892	0.473966	8.08866	1.47997	0.223779	0.506511
MT1083.2	99.2197	110.817	187.036	195.555	1.8216	0.865205	7.14839	7.90235	0.00493705	0.0551788
MT1084	24.4564	29.177	54.6516	58.5007	2.11035	1.07748	5.23743	13.9637	0.000186374	0.00586469	Rv1054	Rv1054	integrase-a
MT1085	87.4852	94.8079	134.176	137.835	1.49221	0.577448	6.68227	3.8127	0.0508653	0.23335	Rv1056	Rv1056	conserved hypothetical protein
MT1087	100.498	152.33	111.308	132.224	0.963344	-0.0538767	8.16282	0.0224904	0.88079	0.944718	Rv1057	Rv1057	conserved hypothetical protein
MT1088	132.506	141.172	79.1403	85.7262	0.602426	-0.731145	6.9094	5.83625	0.0156992	0.113068
MT1089	116.124	114.767	225.091	203.947	1.85815	0.893869	7.19542	8.31601	0.00392972	0.0478036	Rv1059	Rv1059	conserved hypothetical protein
MT1090	60.8214	74.987	99.4054	94.4598	1.42777	0.513762	6.22194	2.98596	0.0839895	0.309721	Rv1060	Rv1060	hypothetical protein
MT1091	38.863	50.6612	50.7266	53.4752	1.16432	0.219483	5.5276	0.518563	0.471455	0.734715
MT1092	9.23649	8.03927	7.67938	8.24572	0.920618	-0.119326	3.18231	0.161223	0.688033	0.864102	Rv1062	Rv1062	conserved hypothetical protein
MT1093	234.34	106.52	67.024	46.2053	0.332205	-1.58985	6.96926	8.47202	0.0036065	0.0449686	Rv1063c	Rv1063c	conserved hypothetical protein
MT1094	7.95849	10.257	9.76988	14.4422	1.32956	0.410949	3.86377	1.39002	0.238401	0.523893	Rv1064c	lpqV	lipoprotein
MT1095	217.667	180.745	89.6781	73.9675	0.410769	-1.2836	7.39128	11.8916	0.000563886	0.0131243	Rv1065	Rv1065	conserved hypothetical protein
MT1096	10.4564	7.06901	3.07175	5.31825	0.476567	-1.06925	3.6668	9.08148	0.00258211	0.0373198
MT1096.1	5.11202	6.58388	3.15708	3.51297	0.571469	-0.807253	2.434	5.22661	0.0222439	0.137668	Rv1067c	PE_PGRS	PE_PGRS-family protein
MT1097	8.07467	11.9203	4.73562	4.78154	0.477379	-1.06679	2.86647	11.227	0.000806162	0.0161145	Rv1068c	PE_PGRS	PE_PGRS-family protein
MT1099	311.368	279.157	215.321	197.019	0.698262	-0.51816	8.09215	2.39466	0.12175	0.379518	Rv1069c	Rv1069c	conserved hypothetical protein
MT1100	233.294	262.246	175.943	202.63	0.763969	-0.388414	7.83748	1.40907	0.235211	0.520229
MT1101	136.514	154.756	118.22	132.468	0.860698	-0.216422	7.19216	0.498581	0.480124	0.739213	Rv1071c	echA9	enoyl-CoA hydratase/isomerase superfamily
MT1102	2680.62	5065.99	2782.33	2656.68	0.702119	-0.510213	11.7522	1.02574	0.31116	0.59705	Rv1072	Rv1072	probable transmembrane protein
MT1103	168.464	553.115	324.411	470.006	1.101	0.138809	8.6755	0.0678914	0.794432	0.913094	Rv1073	Rv1073	conserved hypothetical protein
MT1104	1186.34	1182.88	929.931	865.166	0.757677	-0.400344	10.0109	1.13879	0.285908	0.572104	Rv1074c	fadA3	acetyl-CoA C-acetyltransferase
MT1105	277.734	130.084	81.6148	49.2304	0.320868	-1.63995	7.31219	11.3577	0.000751362	0.015374	Rv1075c	Rv1075c	conserved hypothetical protein
MT1106	219.41	280.681	50.9826	64.8436	0.231613	-2.11021	7.39958	38.2285	6.2928e-10	2.40327e-07	Rv1076	lipU	probable esterase
MT1108	384.621	315.333	166.6	165.012	0.473758	-1.07778	8.16769	10.5172	0.00118266	0.0207348	Rv1077	cysM2	cystathionine [beta]-synthase
MT1109	311.078	338.689	335.717	418.043	1.16004	0.214176	8.35261	0.387551	0.53359	0.777516	Rv1078	pra	MLPRAG (64.8% id) proline rich Ag
MT1110	209.012	218.238	236.44	304.36	1.26574	0.339983	7.87329	0.918152	0.337961	0.621982	Rv1079	metB	cystathionine [gamma]-synthase
MT1111	289.817	513.681	519.382	670.733	1.48122	0.56679	8.88078	2.05007	0.152199	0.423778	Rv1080c	greA	transcription elongation factor G
MT1112	22.7717	19.4051	34.5146	35.1297	1.65026	0.722695	4.97311	5.52739	0.018721	0.125466	Rv1081c	Rv1081c	hypothetical protein
MT1113	368.472	333.907	267.712	190.188	0.651951	-0.617165	8.12614	3.25205	0.071334	0.281805	Rv1082	Rv1082	similar to S. lincolnensis lmbE
MT1114	121.585	110.609	86.9477	59.3301	0.630076	-0.666403	6.52502	4.46165	0.034664	0.18104	Rv1083	Rv1083	conserved hypothetical protein
MT1115	125.419	83.9965	67.7919	45.7174	0.542056	-0.883487	6.49389	5.50518	0.0189602	0.125928	Rv1084	Rv1084	conserved hypothetical protein
MT1117	103.751	86.6993	111.18	122.027	1.22433	0.291987	6.68232	0.857922	0.354321	0.637899	Rv1085c	Rv1085c	possible hemolysin
MT1118	294.057	116.569	168.093	112.025	0.682138	-0.551865	7.5601	1.24634	0.264252	0.549675	Rv1086	Rv1086	conserved hypothetical protein
MT1119	1.51037	1.6633	2.60246	2.63473	1.65113	0.723456	1.25587	3.94021	0.0471449	0.221564	Rv1088	PE	PE-family protein
MT1121	9.23649	17.2567	14.1642	14.4422	1.08147	0.112998	3.48347	0.0793527	0.778177	0.905754
MT1122	10.4564	14.0687	12.5857	14.6862	1.11303	0.154498	3.69523	0.232583	0.629615	0.836273
MT1123	70.2322	45.1862	35.2825	35.2273	0.610709	-0.711442	5.8559	4.46778	0.0345398	0.18104	Rv1091	PE_PGRS	PE_PGRS-family protein
MT1124	161.9	115.876	67.5359	57.4761	0.450052	-1.15184	6.74217	9.07529	0.00259087	0.0373198	Rv1092c	coaA	pantothenate kinase
MT1125	1347.13	1284.34	1418.43	984.754	0.913248	-0.130921	10.1909	0.105783	0.744998	0.889184	Rv1093	glyA	serine hydroxymethyltransferase
MT1126	10140.4	8631.61	5340.97	3424.66	0.466953	-1.09865	12.5721	3.77963	0.0518802	0.236034	Rv1094	desA2	acyl-[ACP] desaturase
MT1127	1557.6	1109.97	723.483	580.713	0.488909	-1.03236	10.1051	5.38323	0.0203312	0.131477	Rv1095	phoH2	PhoH-like protein
MT1128	471.816	562.957	859.025	686.2	1.49332	0.578527	9.04305	2.36582	0.124019	0.383	Rv1096	Rv1096	carbohydrate degrading enzyme
MT1129	254.613	281.444	218.351	250.348	0.874349	-0.193718	7.94346	0.324153	0.569123	0.798352	Rv1097c	Rv1097c	probable membrane spanning protein
MT1130	213.775	271.117	193.947	253.568	0.922932	-0.115704	7.91807	0.105225	0.745647	0.889617	Rv1098c	fum	fumarase
MT1131	197.452	221.634	186.396	163.792	0.835641	-0.259044	7.61954	0.539968	0.462446	0.727516	Rv1099c	Rv1099c	conserved hypothetical protein
MT1132	336.812	155.588	194.544	145.398	0.690345	-0.534611	7.72257	1.42072	0.233286	0.517404	Rv1100	Rv1100	conserved hypothetical protein
MT1133	216.912	229.327	250.647	216.779	1.04751	0.0669634	7.92028	0.04051	0.840487	0.928572	Rv1101c	Rv1101c	putative membrane protein
MT1134	260.713	190.309	248.897	184.187	0.960201	-0.0585916	7.80285	0.0283787	0.866222	0.938426	Rv1102c	Rv1102c	conserved hypothetical protein
MT1135	349.07	239.653	264.555	219.707	0.822536	-0.28185	8.09473	0.607198	0.435845	0.706833
MT1137	81.2114	102.016	82.3827	120.319	1.1063	0.145746	6.71888	0.15359	0.695128	0.868493	Rv1106c	Rv1106c	probable cholesterol dehydrogenase
MT1138	81.2695	102.223	63.3123	58.7934	0.66561	-0.58725	6.41174	3.80741	0.0510262	0.23335	Rv1107c	xseB	exonuclease VII small subunit
MT1139	80.2819	55.166	48.2095	50.1574	0.726028	-0.461903	6.19003	1.95846	0.161678	0.435648	Rv1108c	xseA	exonuclease VII large subunit
MT1140	287.261	356.916	228.376	254.641	0.749844	-0.415337	8.16381	1.58927	0.20743	0.487531	Rv1109c	Rv1109c	hypothetical protein
MT1141	420.464	219.971	307.901	265.571	0.895386	-0.159418	8.23934	0.164923	0.684664	0.862581	Rv1110	lytB'	very similar to LytB
MT1142	258.215	289.344	267.328	337.05	1.10376	0.142432	8.14737	0.179824	0.671524	0.857179	Rv1111c	Rv1111c	hypothetical protein
MT1143	30.6721	41.2359	54.7369	54.7926	1.52381	0.607682	5.32933	3.6191	0.0571198	0.24908	Rv1112	Rv1112	conserved hypothetical protein
MT1143.1	5.57675	8.10857	8.23401	10.978	1.40605	0.491647	2.89303	2.15972	0.141671	0.407546	Rv1113	Rv1113	hypothetical protein
MT1144	12.2572	13.8608	12.4577	15.7108	1.07848	0.108994	3.71836	0.121703	0.727195	0.880578	Rv1114	Rv1114	conserved hypothetical protein
MT1145	7.31948	10.5342	11.0071	12.1002	1.29618	0.374261	3.56199	1.12779	0.288247	0.574479
MT1147	1.80083	2.91077	2.77311	4.34242	1.51417	0.598531	1.93219	1.91222	0.166717	0.441501	Rv1116	Rv1116	hypothetical protein
MT1148	31.3692	44.216	52.3905	52.3042	1.3858	0.470722	5.33776	2.27155	0.131768	0.393235
MT1149	404.605	281.998	362.979	279.086	0.935109	-0.096794	8.37151	0.0728499	0.787232	0.911844	Rv1117	Rv1117	conserved hypothetical protein
MT1150	26.5476	30.0086	43.1325	59.7693	1.81935	0.863425	5.29314	6.33097	0.0118647	0.0962199	Rv1118c	Rv1118c	hypothetical protein
MT1152	9.23649	9.84117	21.0756	10.5389	1.65868	0.730033	3.41354	3.54987	0.05955	0.254395	Rv1120c	Rv1120c	conserved hypothetical protein
MT1153	259.609	248.594	449.799	293.674	1.46297	0.548896	8.05399	2.45355	0.117259	0.37148	Rv1121	zwf	glucose-6-phosphate 1-dehydrogenase
MT1154	88.6471	116.154	200.389	194.336	1.92761	0.946816	7.00705	8.94264	0.0027859	0.0384628	Rv1122	gnd2	6-phosphogluconate dehydrogenase (Gram +)
MT1155	97.535	88.2933	105.592	93.2888	1.0702	0.0978857	6.51512	0.113345	0.736367	0.884015	Rv1123c	bpoB	probable non-heme bromoperoxidase
MT1156	18.473	20.1675	22.8675	27.1767	1.29509	0.373048	4.53261	1.61629	0.203609	0.484361	Rv1124	ephC	probable epoxide hydrolase
MT1157.1	2.84647	2.91077	5.63155	5.5622	1.94311	0.958368	2.14621	8.28589	0.00399543	0.0483227
MT1158	68.199	58.6312	62.6296	67.1855	1.02333	0.0332754	5.9547	0.0125344	0.910858	0.959269
MT1159	264.082	206.873	294.59	241.761	1.13882	0.187539	7.81246	0.285926	0.592843	0.81231	Rv1127c	ppdK	similar to pyruvate, phosphate dikinase
MT1160	66.1077	67.2249	243.607	222.976	3.49926	1.80705	6.87468	33.4001	7.50186e-09	1.66291e-06	Rv1128c	Rv1128c	REP-family protein
MT1161	210.058	106.867	117.196	268.547	1.21693	0.283249	7.34359	0.364672	0.545923	0.785515	Rv1129c	Rv1129c	transcriptional regulator (PbsX/Xre family)
MT1162	1784.39	762.136	306.535	1104.78	0.554202	-0.851517	10.3482	1.96287	0.161207	0.435398	Rv1130	Rv1130	conserved hypothetical protein
MT1163	726.081	374.45	152.18	508.649	0.600434	-0.735923	9.21256	1.77582	0.182664	0.46239	Rv1131	gltA1	citrate synthase 3
MT1164	232.365	182.616	207.983	247.323	1.0971	0.133692	7.80167	0.131524	0.716857	0.879381	Rv1132	Rv1132	possible transporter
MT1165	1049.47	1566.41	1007.19	1582.54	0.990008	-0.0144881	10.6285	0.000964246	0.975228	0.988705	Rv1133c	metE	5-methyltetrahydropteroyltriglutamate-homocystei ne
MT1168	60.8214	64.1755	59.7712	49.3279	0.873001	-0.195944	5.74635	0.472648	0.491771	0.745429	Rv1135c	PPE	PPE-family protein
MT1169.1	14.3485	17.6032	19.7104	16.6866	1.14026	0.18936	3.7387	0.36303	0.546828	0.78625	Rv1136	Rv1136	probable carnitine racemase
MT1171	37.2945	27.8602	32.5947	28.3965	0.935776	-0.0957652	5.01987	0.0883394	0.766299	0.90081	Rv1138c	Rv1138c	conserved hypothetical protein
MT1172	25.5601	24.6029	31.0588	27.3231	1.16387	0.218931	4.67462	0.515438	0.472794	0.734733
MT1172.1	5.69293	7.62344	13.2683	8.53847	1.64239	0.715793	3.02242	4.46139	0.0346692	0.18104
MT1173	824.72	577.857	611.45	393.306	0.716366	-0.481231	9.10863	1.34315	0.246479	0.530163	Rv1140	Rv1140	conserved hypothetical protein
MT1174	66.6305	64.5221	94.8404	89.8735	1.40833	0.49399	6.2366	2.78763	0.0949947	0.33176	Rv1141c	echA11	enoyl-CoA hydratase/isomerase superfamily
MT1175	143.02	85.7984	161.95	137.103	1.30675	0.385983	7.14852	0.917565	0.338115	0.621982	Rv1142c	echA10	enoyl-CoA hydratase/isomerase superfamily
MT1176	44.0912	72.1455	61.7337	65.7218	1.09694	0.133483	5.91239	0.155105	0.693703	0.867673	Rv1143	mcr	[alpha]-methyl acyl-CoA racemase
MT1177	21.4356	33.1966	24.8727	31.8119	1.03808	0.0539228	4.8331	0.0231268	0.879128	0.944548	Rv1144	Rv1144	short-chain alcohol dehydrogenase
MT1178	1494.22	965.544	1896.42	1304.58	1.30134	0.379995	10.7255	0.654011	0.418682	0.692657
MT1180	3.60165	3.95033	4.05301	6.29407	1.36766	0.451713	2.35156	1.77508	0.182754	0.46239	Rv1147	Rv1147	similar to phosphatidylethanolamine N-methyltransferase
MT1181	3.89211	3.95033	2.81577	2.92747	0.732598	-0.448906	1.7821	1.97722	0.159684	0.434957
MT1182	56.2903	98.9662	81.6575	116.172	1.2745	0.349927	6.60744	0.984321	0.321134	0.605828
MT1183	581.957	282.275	437.042	290.796	0.842162	-0.247831	8.72313	0.241618	0.62304	0.834205
MT1185	41.5352	41.9289	38.5249	48.6937	1.04478	0.063195	5.65783	0.0481333	0.826344	0.923601	Rv1151c	Rv1151c	putative transcriptional regulator
MT1186	120.481	48.097	42.9619	33.4708	0.453359	-1.14127	6.21587	5.56972	0.0182737	0.123784	Rv1152	Rv1152	transcriptional regulator (GntR family)
MT1187	47.3443	53.0176	42.4499	42.1068	0.842683	-0.246939	5.61088	0.760194	0.383268	0.662008	Rv1153c	omt	PKS o-methyltransferase
MT1188	34.3319	29.4542	18.3879	19.0774	0.587203	-0.76807	4.87067	6.80668	0.00908173	0.0816129	Rv1154c	Rv1154c	hypothetical protein
MT1189	119.552	114.837	105.336	94.0207	0.850562	-0.233513	6.86696	0.59753	0.439522	0.710047	Rv1155	Rv1155	hypothetical protein
MT1190	35.726	24.0485	24.2754	29.909	0.905768	-0.142787	5.0952	0.163806	0.685676	0.862773
MT1191	914.935	611.816	511.66	410.286	0.603859	-0.727715	9.21199	2.81349	0.0934749	0.328165	Rv1156	Rv1156	hypothetical protein
MT1192	172.589	111.233	96.163	84.3601	0.636003	-0.652894	6.80181	2.83663	0.0921371	0.326966
MT1193	123.56	127.242	57.3821	97.6313	0.617993	-0.694338	6.82642	3.72846	0.0534927	0.239012	Rv1157c	Rv1157c	conserved hypothetical protein
MT1194	310.149	327.808	197.531	373.058	0.894373	-0.161051	8.22283	0.144249	0.704093	0.872375	Rv1158c	Rv1158c	conserved hypothetical protein
MT1195	58.4978	45.6021	62.1604	45.6198	1.03526	0.0499941	6.04477	0.0227883	0.880009	0.944642	Rv1159	Rv1159	probable membrane protein
MT1196	122.688	142.836	86.7344	100.168	0.703928	-0.506499	6.82934	2.7138	0.0994836	0.339837
MT1197	22.6555	28.4147	27.1765	41.4726	1.34427	0.426827	5.08575	1.68479	0.194289	0.476048	Rv1160	mutT2	MutT homologue
MT1198	1374.38	1911.47	1081.21	1196.17	0.693091	-0.528883	10.5179	1.57738	0.209139	0.489135	Rv1161	narG	nitrate reductase [alpha] subunit
MT1199	458.513	713.693	391.265	433.266	0.703421	-0.507539	8.97008	1.77193	0.183143	0.462787	Rv1162	narH	nitrate reductase [beta] chain
MT1200	38.224	50.3147	38.6529	42.302	0.914667	-0.128681	5.57029	0.195328	0.658518	0.849568	Rv1163	narJ	nitrate reductase [delta] chain
MT1201	48.0995	81.5708	53.0731	60.1108	0.873181	-0.195648	5.89926	0.34423	0.557398	0.79337	Rv1164	narI	nitrate reductase [gamma] chain
MT1202	130.705	172.151	143.903	131.248	0.908638	-0.138223	7.10948	0.186068	0.66621	0.853896	Rv1165	Rv1165	conserved hypothetical protein
MT1203	209.825	189.061	212.634	196.775	1.02636	0.0375374	7.66711	0.0131132	0.908831	0.95857	Rv1166	lpqW	lipoprotein
MT1204	182.697	115.876	164.851	151.448	1.05921	0.0829926	7.34177	0.0632395	0.801447	0.916268
MT1205	150.688	243.257	280.042	422.093	1.7824	0.83382	8.17736	4.11733	0.0424459	0.206284	Rv1168c	PPE	PPE-family protein
MT1206	36.2489	96.6098	133.664	208.241	2.57417	1.36411	7.01166	8.47531	0.0036	0.0449686	Rv1169c	PE	PE-family protein
MT1207	74.7052	112.411	396.086	321.388	3.83501	1.93923	7.4855	28.2674	1.05659e-07	1.45372e-05	Rv1170	Rv1170	similar to S. lincolnensis lmbE
MT1208	34.5642	37.4242	34.7279	41.3262	1.05644	0.0792162	5.46876	0.0735686	0.78621	0.911382	Rv1171	Rv1171	hypothetical protein
MT1209	255.659	339.659	412.81	373.741	1.3213	0.401954	8.22173	1.45456	0.227797	0.510911	Rv1172c	PE	PE-family protein
MT1210	667.758	414.438	183.58	228.928	0.381165	-1.39151	8.91478	11.2401	0.000800501	0.0161145	Rv1173	Rv1173	conserved hypothetical protein
MT1211	1250.3	1936.01	3166.68	3044.82	1.94945	0.963066	11.0355	4.50921	0.0337129	0.178401
MT1212	157.543	220.733	215.193	289.576	1.33444	0.416238	8.03054	1.21858	0.26964	0.553684	Rv1175c	fadH	2,4-Dienoyl-CoA Reductase
MT1213	30.0912	40.5429	45.6923	50.4013	1.36088	0.444536	5.72764	1.70632	0.191463	0.473027	Rv1176c	Rv1176c	conserved hypothetical protein
MT1214	1479.52	1830.87	785.814	580.225	0.412659	-1.27698	9.97115	9.27186	0.00232701	0.034172	Rv1177	fdxC	ferredoxin 4Fe-4S
MT1215	359.119	349.431	212.42	174.624	0.546266	-0.872325	8.24194	4.89294	0.0269668	0.154786	Rv1178	Rv1178	possible aminotransferase
MT1216	7.26139	9.21744	27.1765	29.6651	3.4521	1.78747	4.01357	27.1629	1.87011e-07	2.40701e-05
MT1217	41.3028	59.1856	143.135	137.738	2.79597	1.48335	6.35172	20.1788	7.05321e-06	0.000493725	Rv1179c	Rv1179c	hypothetical protein
MT1218	332.397	659.774	1322.13	1688.91	3.03488	1.60164	9.84902	11.9509	0.000546202	0.0129723	Rv1180	pks3	polyketide synthase
MT1219	231.726	688.951	1113.64	1696.52	3.05236	1.60993	9.66861	7.91511	0.00490235	0.0549449	Rv1182	papA3	PKS-associated protein, unknown function
MT1220	79.3525	182.2	440.541	512.894	3.6458	1.86623	8.06354	16.8443	4.05749e-05	0.00195053	Rv1183	mmpL10	conserved large membrane protein
MT1221	75.5185	144.915	616.527	663.561	5.80792	2.53802	8.1573	31.6173	1.87753e-08	3.40515e-06	Rv1184c	Rv1184c	conserved hypothetical protein
MT1222	248.049	555.264	1409.89	1525.56	3.6543	1.8696	9.62689	13.4648	0.000243079	0.00702816	Rv1185c	fadD21	acyl-CoA synthase
MT1223	38.2821	26.1969	25.6406	29.1284	0.848722	-0.236636	5.04196	0.572063	0.44944	0.717674	Rv1186c	Rv1186c	hypothetical protein
MT1224	203.668	120.173	89.5928	79.2858	0.521468	-0.93935	7.07668	4.41308	0.0356645	0.184268	Rv1187	rocA	pyrroline-5-carboxylate dehydrogenase
MT1225	39.8505	29.5235	16.596	15.9059	0.468473	-1.09396	5.00856	7.38964	0.00656005	0.0669953	Rv1188	Rv1188	probable dehydrogenase
MT1226	7.8423	11.7124	17.3639	17.8088	1.8022	0.849761	3.66886	7.17023	0.00741232	0.0726662
MT1227	6.73857	6.7918	16.2547	16.9794	2.45485	1.29564	3.33075	18.9163	1.3658e-05	0.000825688	Rv1190	Rv1190	conserved hypothetical protein
MT1228	46.9376	47.196	40.5301	46.8884	0.928561	-0.106932	5.72376	0.137853	0.710425	0.875686
MT1229	573.069	482.98	528.811	398.185	0.877799	-0.188038	9.38768	0.23991	0.624271	0.834465	Rv1192	Rv1192	hypothetical protein
MT1230	69.8836	63.829	86.0518	101.339	1.40119	0.48665	6.5784	2.78458	0.0951755	0.33195	Rv1193	fadD36	acyl-CoA synthase
MT1231	730.147	728.524	1037.02	641.166	1.1505	0.202258	9.79136	0.261903	0.608816	0.823729	Rv1194c	Rv1194c	conserved hypothetical protein
MT1232	50.4231	51.0078	126.369	90.3614	2.13686	1.09549	6.15526	13.3173	0.000262972	0.00747141
MT1233	431.849	964.296	319.889	343.295	0.475025	-1.07392	9.60831	4.11058	0.0426158	0.206606	Rv1195	PE	PE-family protein
MT1234	233.991	608.905	189.51	359.494	0.651345	-0.618506	9.17806	1.07655	0.299471	0.586587	Rv1196	PPE	PPE-family protein
MT1235	134.655	330.372	105.08	172.477	0.596891	-0.744461	7.87144	1.79891	0.179845	0.460081
MT1236	54.4314	160.785	37.9276	87.7266	0.583896	-0.776215	6.90321	1.7279	0.188679	0.469183
MT1237	12.6639	16.0785	37.5437	26.5424	2.23205	1.15837	4.10484	13.2821	0.000267952	0.00752908
MT1238	88.7052	109.223	249.836	195.75	2.25152	1.1709	7.10638	13.025	0.000307354	0.00834246	Rv1200	Rv1200	probable sugar transporter
MT1239	353.194	326.907	268.053	299.822	0.83497	-0.260204	8.40174	0.609438	0.434999	0.706409	Rv1201c	Rv1201c	conserved hypothetical protein
MT1240	96.896	89.9566	158.665	154.473	1.67573	0.744793	6.86261	6.01034	0.0142223	0.107558	Rv1202	dapE	succinyl-diaminopimelate desuccinylase
MT1241	7.72612	7.69275	7.59406	8.24572	1.02694	0.03835	2.9914	0.013071	0.908978	0.95857	Rv1203c	Rv1203c	hypothetical protein
MT1242	51.1202	47.8198	60.4965	69.2836	1.31145	0.391164	5.88424	1.72337	0.18926	0.469911	Rv1204c	Rv1204c	conserved hypothetical protein
MT1243	195.941	144.915	113.954	111.586	0.661635	-0.595893	7.38317	3.40912	0.064837	0.266861
MT1244	141.394	160.716	130.592	159.401	0.9599	-0.0590445	7.32582	0.0316601	0.858776	0.933761	Rv1206	fadD6	acyl-CoA synthase
MT1245	268.091	213.041	180.764	152.57	0.692807	-0.529475	7.71187	2.60351	0.106627	0.350158	Rv1207	folP2	dihydropteroate synthase
MT1246	132.448	120.104	97.6135	107.633	0.812636	-0.299318	7.0104	0.959593	0.327289	0.613091	Rv1208	Rv1208	conserved hypothetical protein
MT1247	34.8547	18.1577	24.4887	26.0545	0.952345	-0.0704431	5.43305	0.0390038	0.843441	0.929618	Rv1209	Rv1209	conserved hypothetical protein
MT1248	94.3981	97.0256	103.33	85.531	0.986703	-0.0193118	6.64605	0.00412936	0.948763	0.978182	Rv1210	tagA	DNA-3-methyladenine glycosidase I
MT1249	1315.65	1347.48	943.967	785.978	0.649597	-0.622383	10.0043	2.6854	0.101272	0.339837
MT1250	65.2944	53.2948	62.459	51.3284	0.959421	-0.0597646	5.88696	0.0387419	0.843961	0.929618	Rv1212c	Rv1212c	possible involved in LPS synthesis
MT1251	649.285	343.194	327.27	198.434	0.529691	-0.916778	8.27838	3.72735	0.0535281	0.239012	Rv1213	glgC	glucose-1-phosphate adenylyltransferase
MT1252	26.0248	26.1276	53.1157	46.0589	1.90165	0.927249	5.0355	10.0273	0.00154234	0.025221
MT1253	259.028	223.713	215.833	179.015	0.81793	-0.289951	7.73876	0.774635	0.378787	0.658258	Rv1215c	Rv1215c	conserved hypothetical protein
MT1254	41.5933	37.2856	46.6736	40.1064	1.10009	0.137621	5.45026	0.22538	0.634971	0.83871	Rv1216c	Rv1216c	conserved hypothetical protein
MT1255	24.6887	14.9697	19.9664	28.2501	1.21374	0.279454	4.95667	0.680923	0.409269	0.685264	Rv1217c	Rv1217c	probable integral membrane protein
MT1256	33.6348	30.8403	33.1067	37.3253	1.09203	0.127013	5.22941	0.19126	0.66187	0.851342	Rv1218c	Rv1218c	probable ABC transmembrane transport proteinportein
MT1257	24.5145	22.5931	22.1849	24.2005	0.984288	-0.0228474	4.72971	0.00636162	0.936428	0.974276	Rv1219c	Rv1219c	putative transcriptional regulator
MT1258	118.738	67.0863	49.404	61.6721	0.597526	-0.742926	6.61444	4.76229	0.0290898	0.16189	Rv1220c	Rv1220c	probable methyltransferase
MT1259	1600.64	1247.68	1030.19	744.31	0.623	-0.682696	10.6211	2.44219	0.118112	0.373427	Rv1221	sigE	ECF subfamily sigma subunit
MT1260	392.987	302.928	229.144	248.738	0.686672	-0.542308	8.37822	2.38068	0.122844	0.38114	Rv1222	Rv1222	hypothetical protein
MT1261	863.873	915.16	913.164	884	1.0102	0.0146338	9.79529	0.00157955	0.968298	0.988615	Rv1223	htrA	serine protease
MT1262	199.078	265.019	259.307	195.067	0.979146	-0.0304036	7.75067	0.00804917	0.928512	0.969579	Rv1224	Rv1224	conserved hypothetical protein
MT1263	40.8381	18.2963	18.4305	15.0277	0.565603	-0.822139	4.82559	3.03883	0.0812944	0.305262	Rv1225c	Rv1225c	conserved hypothetical protein
MT1264	89.4023	45.1862	20.521	14.8813	0.263108	-1.92627	5.88709	16.0191	6.27051e-05	0.00269445	Rv1226c	Rv1226c	possible membrane protein
MT1264.1	2.6141	2.21773	1.96251	1.6589	0.749724	-0.415569	1.23838	0.978196	0.322644	0.606955
MT1265	27.8257	18.7121	24.6594	22.2488	1.00725	0.0104233	4.5946	0.000915229	0.975865	0.988705
MT1266	8.82985	8.17788	9.55657	7.41627	0.998404	-0.00230504	3.04461	5.3448e-05	0.994167	0.996164
MT1267	644.231	360.381	264.768	232.441	0.494919	-1.01473	8.58677	5.79063	0.0161118	0.114049	Rv1229c	mrp	similar to MRP/NBP35 ATP-binding proteins
MT1268	104.622	111.233	69.4984	111.049	0.836334	-0.257849	6.57153	0.632939	0.426279	0.699738	Rv1230c	Rv1230c	possible membrane protein
MT1269	60.7052	49.5524	32.4241	39.0818	0.648287	-0.625296	5.73915	4.51739	0.0335519	0.178182	Rv1231c	Rv1231c	hypothetical protein
MT1270	135.062	90.5111	78.543	76.5047	0.687251	-0.541091	6.73016	2.55177	0.110171	0.35776	Rv1232c	Rv1232c	hypothetical protein
MT1271	308.232	234.802	197.701	167.452	0.672422	-0.572561	7.9425	2.82263	0.0929437	0.327892	Rv1233c	Rv1233c	hypothetical protein
MT1272	207.56	158.36	133.664	102.022	0.644099	-0.634646	7.21316	3.35266	0.0670966	0.271242
MT1273	110.373	118.302	89.0382	90.6541	0.785834	-0.347703	6.66452	1.32923	0.248943	0.532877	Rv1235	lpqY	possible role in sugar transport
MT1274	50.5393	59.5322	52.3051	46.6444	0.899243	-0.153218	5.7228	0.289686	0.590422	0.810291	Rv1236	sugA	membrane protein probably involved in sugar
MT1275	42.5808	58.0075	50.9826	50.1086	1.00542	0.00779433	5.67505	0.000691704	0.979018	0.988709
MT1276	159.983	243.188	340.922	310.654	1.61626	0.692655	7.89065	3.33199	0.0679448	0.273043	Rv1238	sugC	ABC transporter component of sugar uptake system
MT1277	93.4686	128.628	113.826	142.568	1.15453	0.207301	6.80512	0.382505	0.536265	0.778922
MT1278	306.547	309.997	179.655	220.829	0.649551	-0.622485	8.1928	3.62399	0.056952	0.24862	Rv1240	mdh	malate dehydrogenase
MT1279	41.8256	73.0465	37.5437	57.9152	0.831168	-0.266788	5.81457	0.476431	0.490043	0.745182	Rv1241	Rv1241	conserved hypothetical protein
MT1280	43.6845	59.6015	40.2741	58.5007	0.956422	-0.0642809	5.71305	0.0372871	0.846882	0.930771
MT1280.1	20.39	11.9203	9.00195	7.02594	0.495916	-1.01183	3.94734	7.25239	0.00708069	0.0708804	Rv1243c	PE_PGRS	PE_PGRS-family protein
MT1281	41.8256	31.2561	31.5281	28.982	0.827654	-0.2729	5.33103	0.857491	0.354442	0.637899	Rv1244	lpqZ	lipoprotein
MT1283	248.049	141.172	89.5928	84.0673	0.446152	-1.16439	7.73707	8.15543	0.00429324	0.049961	Rv1245c	Rv1245c	putative dehydrogenase
MT1284	98.2902	90.1645	117.537	118.758	1.25377	0.326268	6.80938	1.10882	0.292338	0.578991
MT1286	1126.39	1413.94	1260.74	1236.61	0.983091	-0.0246034	10.2168	0.00383857	0.950598	0.979314	Rv1248c	sucA	2-oxoglutarate dehydrogenase
MT1287	54.6638	69.9971	67.9199	93.6304	1.29602	0.374088	6.26883	1.37179	0.241505	0.52598	Rv1249c	Rv1249c	possible membrane protein
MT1289	48.6804	54.473	48.3801	45.9126	0.914296	-0.129267	5.63118	0.207059	0.649083	0.844249	Rv1250	Rv1250	probable drug efflux protein
MT1290	142.73	158.983	219.673	262.497	1.59811	0.676365	7.34347	4.13302	0.0420543	0.20488	Rv1251c	Rv1251c	hypothetical protein
MT1291	127.51	110.193	120.268	152.912	1.14908	0.200484	6.77793	0.420341	0.516767	0.763667	Rv1252c	lprE	lipoprotein
MT1292	355.285	297.314	470.021	347.101	1.25209	0.324337	8.2872	0.900972	0.342521	0.625504	Rv1253	deaD	ATP-dependent DNA/RNA helicase
MT1293	126.464	107.144	220.868	184.87	1.73669	0.796341	7.09496	6.51649	0.0106879	0.0899675	Rv1254	Rv1254	acyltransferase
MT1294	15.3942	7.96996	9.42858	10.3925	0.846374	-0.240632	3.57634	0.408377	0.522795	0.770008	Rv1255c	Rv1255c	transcriptional regulator (TetR/AcrR family)
MT1295	39.8505	25.5039	28.4137	32.8365	0.936363	-0.0948609	5.02633	0.0878869	0.766881	0.90081	Rv1256c	Rv1256c	Probable cytochrome P-450
MT1296	429.468	186.151	178.375	167.549	0.561879	-0.831668	7.88266	3.7599	0.0524956	0.237355	Rv1257c	Rv1257c	similar to many dehydrogenases
MT1297	149.933	79.0759	25.4273	29.1284	0.238174	-2.06991	6.06495	32.4172	1.24379e-08	2.61195e-06	Rv1258c	Rv1258c	probable multidrug resistance pump
MT1297.1	19.4605	9.70256	8.91662	11.1244	0.685794	-0.544153	3.73381	1.96779	0.160683	0.434957
MT1298	144.24	170.765	253.377	240.102	1.56666	0.647691	7.41695	4.17401	0.0410484	0.20109	Rv1260	Rv1260	probable oxidoreductase
MT1299	173.576	175.755	193.904	186.968	1.0903	0.124723	7.48104	0.153914	0.694823	0.868493	Rv1261c	Rv1261c	conserved hypothetical protein
MT1300	89.1118	92.1744	111.095	99.9732	1.16434	0.219508	6.6442	0.501269	0.478943	0.738126	Rv1262c	Rv1262c	conserved hypothetical protein
MT1301	76.7384	46.2258	32.5521	36.691	0.562901	-0.829046	5.70943	5.35456	0.0206682	0.132795	Rv1263	amiB2	putative amidase AMI2_MYCTU Q11056
MT1302	294.348	337.649	211.61	152.473	0.576132	-0.795528	8.10769	5.52084	0.0187912	0.125466	Rv1264	Rv1264	similar to adenylate cyclases
MT1303	698.255	426.636	351.716	161.645	0.45638	-1.13169	9.51066	5.57854	0.0181819	0.123377	Rv1265	Rv1265	hypothetical protein
MT1304	307.999	295.79	200.987	195.604	0.656842	-0.606383	7.97913	3.46704	0.0626032	0.261034
MT1305	83.8836	81.9174	96.9736	89.9223	1.12723	0.172786	6.25398	0.3697	0.543168	0.784049	Rv1267c	embR	regulator of embAB genes (AfsR/DndI/RedD family)
MT1305.1	5.05393	4.92059	8.19134	5.5622	1.38055	0.465238	2.53457	2.12313	0.145089	0.414298
MT1306	9.06222	12.4747	10.5378	12.4418	1.06783	0.0946773	3.58024	0.0601556	0.80625	0.918338	Rv1268c	Rv1268c	hypothetical protein
MT1307	35.7841	51.285	39.1222	46.4005	0.982566	-0.0253741	5.54303	0.0061083	0.937704	0.974514	Rv1269c	Rv1269c	conserved hypothetical protein
MT1308	131.983	153.855	112.93	118.709	0.810427	-0.303245	7.00958	0.802354	0.370391	0.6519	Rv1270c	lprA	lipoprotein
MT1309	27.4771	32.0878	42.0233	35.2761	1.29829	0.376609	4.96976	1.50229	0.220319	0.50323	Rv1271c	Rv1271c	conserved hypothetical protein
MT1310	63.0289	56.6907	90.2754	77.822	1.40398	0.489521	6.10318	2.68151	0.101519	0.339837	Rv1272c	Rv1272c	probable ABC transporter
MT1311	26.0248	34.0976	31.5708	37.1301	1.14309	0.192944	4.99773	0.391216	0.531661	0.776389	Rv1273c	Rv1273c	ABC transporter
MT1312	97.3607	101.6	104.44	124.222	1.14924	0.200686	6.68312	0.451259	0.501738	0.753572
MT1312.1	172.414	181.646	167.581	194.677	1.02314	0.033009	7.46656	0.0109153	0.916791	0.963062	Rv1275	lprC	lipoprotein
MT1313	11.5601	10.6728	12.1164	12.0026	1.08435	0.116828	3.52672	0.143029	0.705288	0.872864	Rv1276c	Rv1276c	hypothetical protein
MT1314	275.12	310.898	188.273	256.349	0.75871	-0.39838	7.81465	1.41531	0.234177	0.518805	Rv1277	Rv1277	hypothetical protein
MT1315	250.257	208.051	163.016	216.487	0.827988	-0.272318	7.76092	0.664716	0.4149	0.690869	Rv1278	Rv1278	hypothetical protein
MT1316	266.929	287.196	252.694	326.853	1.04587	0.0646969	7.97923	0.0377669	0.845912	0.930739	Rv1279	Rv1279	probable choline dehydrogenase
MT1317	276.862	262.87	507.863	430.095	1.7378	0.797265	8.35163	5.71752	0.0167965	0.117704	Rv1280c	oppA	probable oligopeptide transport protein
MT1318	59.3691	64.3834	71.5889	93.484	1.33382	0.415567	6.17019	1.84658	0.174181	0.453845	Rv1281c	oppD	probable peptide transport protein
MT1319	68.8961	97.5108	96.2056	115.05	1.26967	0.344454	6.45726	0.895839	0.3439	0.626843	Rv1282c	oppC	oligopeptide transport system permease
MT1320	59.7177	72.2148	78.3297	103.389	1.37742	0.461973	6.31226	2.25083	0.133543	0.396455	Rv1283c	oppB	oligopeptide transport protein
MT1322	288.539	301.195	423.689	306.653	1.23846	0.308549	8.0342	0.861726	0.353256	0.636915	Rv1284	Rv1284	conserved hypothetical protein
MT1323	112.406	132.925	87.673	71.6255	0.64944	-0.622732	6.72948	3.80451	0.0511148	0.23335
MT1324	239.742	332.244	281.705	245.371	0.921553	-0.117862	8.02899	0.118824	0.730313	0.881261	Rv1286	cysN	ATP:sulphurylase subunit 1
MT1325	94.1076	84.7588	90.1474	75.3825	0.925444	-0.111782	6.4438	0.141687	0.706609	0.873847	Rv1287	Rv1287	conserved hypothetical protein
MT1326	58.8463	68.6803	61.947	59.2326	0.95042	-0.0733625	5.95648	0.0639299	0.800389	0.915583	Rv1288	Rv1288	conserved hypothetical protein
MT1327	144.298	95.5703	44.8817	39.3745	0.351269	-1.50935	6.39272	15.1753	9.79767e-05	0.00375891	Rv1289	Rv1289	hypothetical protein
MT1328	63.3774	64.6607	65.7867	54.451	0.939205	-0.0904874	5.91513	0.0894594	0.764866	0.90081	Rv1290c	Rv1290c	hypothetical protein
MT1329	1.278	1.94051	2.60246	2.34198	1.55148	0.633642	1.04776	3.15449	0.0757182	0.291899
MT1330.1	37.585	58.0075	67.9626	53.8655	1.27516	0.350673	5.618	1.10855	0.292398	0.578991
MT1331	249.618	309.304	391.137	354.029	1.33328	0.414979	8.20093	1.58895	0.207476	0.487531	Rv1292	argS	arginyl-tRNA synthase
MT1332	273.435	362.391	462.299	388.573	1.33828	0.420383	8.40216	1.50173	0.220405	0.50323	Rv1293	lysA	diaminopimelate decarboxylase
MT1333	274.539	351.926	517.335	548.511	1.70141	0.766734	8.57385	4.9455	0.0261586	0.151926	Rv1294	thrA	homoserine dehydrogenase
MT1334	206.282	215.12	320.657	321.534	1.52394	0.607809	7.92307	3.53752	0.0599949	0.255364	Rv1295	thrC	homoserine synthase
MT1335	42.7551	52.8097	79.6949	89.971	1.7757	0.828388	5.99554	7.25052	0.00708804	0.0708804	Rv1296	thrB	homoserine kinase
MT1336	1806.11	3274.55	2977.38	2603.84	1.09853	0.135574	11.3805	0.0706238	0.790431	0.912827	Rv1297	rho	transcription termination factor rho
MT1337	420.406	798.175	589.734	840.575	1.17378	0.231159	9.3939	0.291908	0.589001	0.809239	Rv1298	rpmE	50S ribosomal protein L31
MT1338	156.614	231.961	277.439	328.023	1.55827	0.639944	7.84202	3.22675	0.0724441	0.283786
MT1339	287.377	344.51	520.065	421.459	1.49007	0.575381	8.54155	2.8688	0.0903123	0.32318	Rv1300	hemK	protoporphyrinogen oxidase
MT1340	184.73	198.903	282.772	246.445	1.37953	0.464174	7.76441	2.01318	0.155938	0.430166	Rv1301	Rv1301	conserved hypothetical protein
MT1341	106.888	143.737	126.795	136.615	1.05113	0.0719411	7.00935	0.0474235	0.827609	0.923601	Rv1302	rfe	hypothetical protein
MT1342	387.352	206.387	169.16	77.3341	0.415183	-1.26818	7.5876	7.85243	0.00507525	0.0559399
MT1343	264.024	251.92	214.297	157.693	0.721022	-0.471885	7.85702	1.84694	0.174139	0.453845
MT1344	614.488	1135.75	621.262	437.95	0.605204	-0.724506	9.36793	3.00676	0.0829179	0.308047
MT1345	293.651	438.695	284.521	287.478	0.781094	-0.356431	8.42138	1.02739	0.310772	0.59705	Rv1305	atpE	ATP synthase c chain
MT1346	1028.45	1289.54	818.196	781.636	0.690189	-0.534936	10.0296	1.77631	0.182603	0.46239	Rv1306	atpF	ATP synthase b chain
MT1347	1190.29	1346.51	993.499	854.237	0.72838	-0.457236	10.2175	1.29443	0.255233	0.540099	Rv1307	atpH	ATP synthase [delta] chain
MT1348	1642.53	2023.82	1677.86	1504.62	0.868031	-0.204181	10.7964	0.219568	0.639369	0.840001	Rv1308	atpA	ATP synthase [alpha] chain
MT1349	563.484	669.893	577.02	537.972	0.90403	-0.145557	9.26774	0.147068	0.701353	0.87069	Rv1309	atpG	ATP synthase [gamma] chain
MT1350	916.388	1119.68	930.741	941.622	0.919607	-0.120911	10.0018	0.0969114	0.755568	0.895221	Rv1310	atpD	ATP synthase [beta] chain
MT1351	216.912	301.68	233.112	214.389	0.86297	-0.212618	7.95563	0.323267	0.569651	0.798352	Rv1311	atpC	ATP synthase [epsilon] chain
MT1352	73.1367	75.1949	86.2224	75.4313	1.08989	0.124187	6.38291	0.166536	0.683209	0.861416	Rv1312	Rv1312	conserved hypothetical protein
MT1353	35.7841	43.8695	53.2011	54.4022	1.3513	0.434345	5.60316	2.27755	0.131259	0.392866	Rv1313c	Rv1313c	transposase
MT1354	98.9873	64.2448	61.819	46.9372	0.666224	-0.58592	6.16361	2.42949	0.119071	0.374439	Rv1314c	Rv1314c	conserved hypothetical protein
MT1355	247.41	242.356	232.173	211.656	0.906217	-0.142072	7.93727	0.193543	0.659984	0.850012	Rv1315	murA	UDP-N-acetylglucosamine-1-carboxyvinyltransferase
MT1356	7.08712	8.5937	7.29542	9.56308	1.07538	0.104853	3.12726	0.0992271	0.752759	0.893635
MT1357	151.211	195.922	171.165	173.355	0.992556	-0.0107794	7.32423	0.00117723	0.972629	0.988705	Rv1316c	ogt	methylated-DNA-protein-cysteine methyltransferase
MT1358	145.286	78.0363	94.4991	103.047	0.884379	-0.177264	6.93401	0.214525	0.643244	0.841258
MT1359	50.8297	48.998	48.5508	53.6704	1.02384	0.0339956	5.70425	0.0138159	0.906431	0.957802	Rv1318c	Rv1318c	similar at C-term to adenylate cyclases
MT1360	114.207	128.005	129.142	139.494	1.10913	0.14943	6.90409	0.231778	0.630208	0.836273
MT1361	92.423	94.2535	90.6167	97.924	1.00997	0.0143112	6.56198	0.00243963	0.960606	0.983783	Rv1319c	Rv1319c	similar at C-term to adenylate cyclases
MT1362	146.041	189.131	150.516	152.912	0.905368	-0.143425	7.27146	0.195259	0.658575	0.849568	Rv1320c	Rv1320c	similar at C-term to adenylate cyclases
MT1363	85.8006	116.361	110.583	116.123	1.12157	0.165514	6.8547	0.249766	0.61724	0.829665
MT1363.1	84.1741	71.1059	149.193	112.22	1.68334	0.751327	6.52242	5.96793	0.0145684	0.109263	Rv1322	Rv1322	hypothetical protein
MT1364	2204.85	1407.84	931.424	714.596	0.455623	-1.13409	10.5902	6.25141	0.0124094	0.0987585
MT1365	1016.89	1049.47	1063.17	804.714	0.903957	-0.145673	9.93917	0.148641	0.699837	0.869621	Rv1323	fadA4	acetyl-CoA C-acetyltransferase (aka thiL)
MT1366	649.865	624.36	455.132	384.28	0.65877	-0.602153	9.01741	2.93944	0.0864406	0.315263	Rv1324	Rv1324	hypothetical protein
MT1367	25.502	23.2169	20.905	25.5178	0.952335	-0.0704591	4.87245	0.057436	0.810595	0.919353
MT1368	509.517	482.217	618.19	485.082	1.11247	0.15377	8.89658	0.174868	0.675821	0.858233
MT1369	762.446	752.434	570.066	444.781	0.669929	-0.577919	9.30617	2.57196	0.108773	0.354578	Rv1326c	glgB	1,4-[alpha]-glucan branching enzyme
MT1370	501.385	539.671	516.609	539.582	1.01454	0.0208315	8.88321	0.00352007	0.952689	0.979992	Rv1327c	Rv1327c	probable glycosyl hydrolase, [alpha]-amylase family
MT1371	66.8048	57.1758	72.2289	75.968	1.19506	0.257085	6.10293	0.796522	0.372135	0.651982	Rv1328	glgP	probable glycogen phosphorylase
MT1372	133.958	91.8971	90.1474	93.6792	0.813764	-0.297317	6.68236	0.839707	0.359481	0.642737	Rv1329c	dinG	probable ATP-dependent helicase
MT1373	94.8047	56.8986	58.5766	50.011	0.715651	-0.482671	6.30153	1.79385	0.180458	0.460081	Rv1330c	Rv1330c	conserved hypothetical protein
MT1374	611.003	528.305	430.046	337.538	0.673734	-0.569749	8.90722	2.13683	0.143799	0.412387	Rv1331	Rv1331	conserved hypothetical protein
MT1375	231.145	122.945	159.347	111.049	0.7636	-0.38911	7.45737	0.751182	0.386102	0.664602	Rv1332	Rv1332	putative transcriptional regulator
MT1376	161.435	134.034	168.776	128.028	1.0045	0.00648399	7.18619	0.000379717	0.984453	0.991415	Rv1333	Rv1333	probable hydrolase
MT1376.1	161.261	137.222	177.906	113.781	0.977261	-0.0331836	7.12624	0.00982813	0.92103	0.964963	Rv1335	Rv1335	conserved hypothetical protein
MT1377	313.285	244.92	284.649	197.507	0.863761	-0.211296	7.9593	0.360244	0.54837	0.787352	Rv1336	cysM	cysteine synthase B
MT1378	172.356	167.716	187.676	151.985	0.998817	-0.00170804	7.43283	2.68231e-05	0.995868	0.997367	Rv1337	Rv1337	conserved hypothetical protein
MT1379	59.6596	52.1859	69.0291	54.6462	1.10573	0.145006	5.98296	0.233568	0.628891	0.836273	Rv1338	murI	glutamate racemase
MT1380	613.036	470.159	551.38	319.143	0.803671	-0.315323	9.09483	0.644953	0.421923	0.696415	Rv1339	Rv1339	conserved hypothetical protein
MT1381	178.979	167.3	183.58	134.761	0.919356	-0.121304	7.51639	0.133773	0.714551	0.877807	Rv1340	rphA	ribonuclease PH
MT1382	47.4024	39.5033	50.0867	47.6202	1.12398	0.168621	5.74371	0.345657	0.556582	0.79302	Rv1341	Rv1341	conserved hypothetical protein
MT1383	49.3775	100.144	122.529	126.467	1.6656	0.736042	6.9415	2.31589	0.128058	0.389148	Rv1342c	pks14	polyketide synthase (chalcone synthase-like)
MT1384	78.0745	100.144	127.307	115.489	1.36246	0.44621	7.10282	1.03842	0.30819	0.595197	Rv1343c	Rv1343c	conserved hypothetical protein
MT1385	38.5144	66.1854	61.8617	99.1438	1.53791	0.620968	7.41382	1.15558	0.282385	0.568188
MT1387	40.8962	52.6018	54.097	78.066	1.4136	0.499377	6.6397	1.53058	0.216025	0.496952	Rv1345	fadD33	acyl-CoA synthase
MT1388	83.3027	116.708	93.3899	139.104	1.16245	0.217168	7.37461	0.247627	0.618751	0.830227	Rv1346	fadE14	acyl-CoA dehydrogenase
MT1389	27.7095	43.1764	81.0175	98.8023	2.53732	1.3433	6.06077	8.91367	0.00283044	0.0389429	Rv1347c	Rv1347c	possible aminoglycoside 6'-N-acetyltransferase
MT1390	57.2198	140.756	133.365	255.666	1.96523	0.9747	7.36457	3.04565	0.0809536	0.304721	Rv1348	Rv1348	heavy metal tolerance protein
MT1392	20.6804	61.6806	39.2075	86.2141	1.52321	0.607118	6.06309	1.0875	0.297027	0.583811	Rv1349	Rv1349	probable membrane protein
MT1393	69.2446	53.7106	117.025	62.9407	1.4636	0.549521	5.94375	1.99822	0.157484	0.431568	Rv1350	fabG2	3-oxoacyl-[ACP] reductase
MT1394	59.6596	69.5812	210.842	160.767	2.87573	1.52393	6.57127	24.7756	6.44066e-07	7.34235e-05	Rv1351	Rv1351	hypothetical protein
MT1395	144.879	117.47	176.754	140.421	1.20893	0.273729	7.09017	0.52746	0.467676	0.732659
MT1396	6.73857	11.7124	34.8985	30.5433	3.55338	1.82919	4.00028	21.6352	3.2974e-06	0.000263132	Rv1353c	Rv1353c	transcriptional regulator (TetR/AcrR family)
MT1397	29.5684	27.9295	68.1332	49.5719	2.04703	1.03354	5.16983	11.9343	0.000551099	0.0130112	Rv1354c	Rv1354c	conserved hypothetical protein
MT1398	15.5103	18.4349	60.9231	52.6945	3.34868	1.74359	4.81182	32.1648	1.41632e-08	2.69102e-06	Rv1355c	moeY	weak similarity to E. coli MoeB
MT1399	4.70538	7.62344	16.2547	11.5147	2.26135	1.17718	2.94697	12.1904	0.00048036	0.0117585	Rv1356c	Rv1356c	hypothetical protein
MT1402	16.6141	17.6032	33.1067	27.2255	1.76377	0.818662	4.41196	7.79966	0.00522562	0.0571239	Rv1358	Rv1358	transcriptional regulator (LuxR/UhpA family)
MT1403	9.12031	12.3361	15.7001	13.564	1.36641	0.450396	3.58409	2.12687	0.144736	0.413679	Rv1359	Rv1359	putative transcriptional regulator
MT1404	18.8215	24.3257	19.6678	25.1275	1.03849	0.0544827	4.48662	0.0258587	0.872246	0.942139
MT1405	156.846	173.537	191.814	193.555	1.16646	0.22214	7.42271	0.486157	0.485647	0.742141	Rv1360	Rv1360	coenzyme F420-dependent
MT1406	397.634	660.398	384.95	574.663	0.906992	-0.140838	9.42923	0.0868005	0.768285	0.90081
MT1407	66.5143	86.4221	115.447	114.171	1.50169	0.586586	6.36674	3.78172	0.0518153	0.236008	Rv1362c	Rv1362c	conserved hypothetical protein
MT1408	88.2985	100.491	156.574	116.513	1.44672	0.532785	6.56518	3.00999	0.0827528	0.308007
MT1409	19.3443	29.2463	41.3407	39.96	1.67453	0.743759	4.96364	5.03798	0.0247973	0.147234
MT1410	264.14	215.951	185.67	157.888	0.715606	-0.482762	7.733	2.08282	0.148964	0.419644	Rv1364c	rsbU	SigB regulation protein
MT1411	31.0207	32.4343	17.108	16.1011	0.523566	-0.933555	4.83182	10.3687	0.00128168	0.0217823	Rv1365c	Rv1365c	conserved hypothetical protein
MT1412	65.5268	63.3439	35.1119	29.3723	0.500505	-0.998545	5.56114	10.5457	0.00116457	0.0206517	Rv1366	Rv1366	hypothetical protein
MT1413	28.8132	38.3251	32.8934	31.4703	0.959254	-0.0600146	4.89938	0.0403529	0.840792	0.928572
MT1414	43.1617	57.2451	100.856	106.267	2.06333	1.04498	6.08959	10.5131	0.00118533	0.0207348	Rv1367c	Rv1367c	probable penicillin binding protein
MT1414.1	26.5476	30.4245	20.0517	28.5917	0.853682	-0.22823	4.67647	0.530091	0.466568	0.731477
MT1415	81.0952	110.609	75.6419	87.6779	0.852067	-0.230962	6.41375	0.588298	0.443078	0.712855	Rv1368	lprF	lipoprotein
MT1416	18.4149	31.1175	31.8694	38.8378	1.42835	0.514354	4.65816	1.74717	0.186233	0.466752	Rv1371	Rv1371	hypothetical protein
MT1417	161.726	83.9272	180.338	81.8229	1.06716	0.093774	6.82058	0.0260183	0.871856	0.941972	Rv1372	pks18	polyketide synthase
MT1418	67.3857	56.067	135.285	107.097	1.96304	0.973086	6.30752	9.7733	0.00177064	0.0279243	Rv1373	Rv1373	slight similarity to sulfotransferases
MT1418.1	4.18256	5.40571	6.6128	6.58682	1.38026	0.464942	2.46382	2.19492	0.138466	0.402977
MT1419	130.473	119.549	84.6439	72.3574	0.627982	-0.671204	6.54103	4.47233	0.0344481	0.18104	Rv1375	Rv1375	conserved hypothetical protein
MT1420	38.1659	40.3349	31.9974	25.1275	0.728041	-0.457909	5.15204	2.45198	0.117377	0.37148	Rv1376	Rv1376	conserved hypothetical protein
MT1421	99.2777	78.0363	89.0809	111.927	1.13333	0.180568	6.48774	0.360059	0.548474	0.787352	Rv1377c	Rv1377c	some similarity to methyltransferases
MT1422	632.612	477.643	297.235	541.192	0.755151	-0.405163	9.30396	0.517162	0.472055	0.734715	Rv1378c	Rv1378c	conserved hypothetical protein
MT1423	107.004	156.35	150.431	113.781	1.00347	0.00500219	6.96192	0.00023062	0.987884	0.992953	Rv1379	pyrR	regulatory protein pyrimidine biosynthesis
MT1424	41.8837	42.5527	30.4616	35.4712	0.780785	-0.357003	5.30984	1.36216	0.243164	0.52701	Rv1380	pyrB	aspartate carbamoyltransferase
MT1425	85.1616	102.154	66.8533	77.2853	0.769554	-0.377905	6.41533	1.64912	0.199079	0.479523	Rv1381	pyrC	dihydroorotase
MT1426	24.3983	30.9789	24.1047	31.7631	1.00903	0.0129622	4.8105	0.00152018	0.968899	0.988705
MT1427	81.4438	106.174	75.8553	85.9214	0.862383	-0.2136	6.38409	0.485739	0.485834	0.742144	Rv1383	carA	carbamoyl-phosphate synthase subunit
MT1428	325.717	350.817	357.731	315.289	0.99483	-0.00747803	8.28645	0.000535258	0.981542	0.990228	Rv1384	carB	carbamoyl-phosphate synthase subunit
MT1429	27.1866	25.1574	27.9871	27.1279	1.05276	0.0741826	4.92729	0.0626697	0.802325	0.916484	Rv1385	pyrF	orotidine 5'-phosphate decarboxylase
MT1430	57.8588	57.0372	336.784	202.142	4.69032	2.22968	6.8422	33.9742	5.58464e-09	1.39267e-06	Rv1386	PE	PE-family protein
MT1431	714.463	641.894	3711.79	1496.92	3.84019	1.94118	10.1495	17.322	3.15509e-05	0.00159352	Rv1387	PPE	PPE-family protein
MT1433	765.873	1437.43	743.108	1217.73	0.88996	-0.168188	10.1659	0.120801	0.728167	0.880619
MT1434	239.916	325.244	198.128	434.925	1.12012	0.163652	8.64663	0.163614	0.685851	0.862773
MT1435	951.01	1402.71	2207.65	1584.4	1.61111	0.688051	10.2944	2.77245	0.0958994	0.333304	Rv1390	Rv1390	hypothetical protein
MT1436	633.019	940.109	1632.17	1253.25	1.83423	0.875172	9.87773	4.83228	0.0279316	0.157908
MT1437	339.252	461.842	576.679	620.625	1.49462	0.579782	8.99492	2.50565	0.113439	0.364135	Rv1392	metK	S-adenosylmethionine synthase
MT1438	161.145	131.955	66.512	71.04	0.469277	-1.09149	6.98278	10.5514	0.00116097	0.0206517	Rv1393c	Rv1393c	FAD-containing monooxygenase
MT1439	154.522	122.114	98.9787	97.1434	0.708899	-0.496349	6.97285	2.52003	0.112409	0.361994	Rv1394c	Rv1394c	possible cytochrome p450
MT1440	12.6639	9.77187	9.72722	13.564	1.03584	0.050808	3.74524	0.025268	0.873701	0.942945	Rv1395	Rv1395	transcriptional regulator (AraC/XylS family)
MT1441	824.546	524.701	1143.97	545.096	1.25185	0.324064	9.57055	0.419143	0.517365	0.763937	Rv1397c	Rv1397c	conserved hypothetical protein
MT1442	1794.84	1375.06	2474.17	1236.76	1.17068	0.227342	10.774	0.21024	0.64658	0.843365	Rv1398c	Rv1398c	conserved hypothetical protein
MT1443	61.2281	46.7109	39.2929	49.9134	0.826069	-0.275665	5.80123	0.800817	0.370849	0.651982	Rv1399c	lipH	probable lipase
MT1444	44.0912	36.5925	29.651	31.8119	0.761522	-0.393043	5.38975	1.71812	0.189935	0.471001	Rv1400c	lipI	probable lipase
MT1445	24.4564	25.7118	36.1784	36.6422	1.45158	0.537626	4.99439	3.10092	0.0782483	0.297365	Rv1401	Rv1401	possible membrane protein
MT1446	7.60994	6.51458	11.6897	13.3688	1.77054	0.82419	3.46811	7.04555	0.00794625	0.0754893
MT1447	18.7053	18.9893	36.8184	26.64	1.68375	0.751674	4.31193	4.30743	0.0379461	0.190207
MT1448	396.879	412.22	344.463	291.723	0.786307	-0.346835	8.44094	1.00076	0.317127	0.602542	Rv1404	Rv1404	transcriptional regulator (MarR family)
MT1449	157.834	105.55	165.064	70.3082	0.893663	-0.162198	6.64258	0.0676604	0.794774	0.913094	Rv1405c	Rv1405c	similar to phosphatidylethanolamine N-methyltransferase
MT1450	46.1244	34.3748	40.4448	43.1802	1.03829	0.0542142	5.59073	0.0319743	0.858084	0.933761	Rv1406	fmt	methionyl-tRNA formyltransferase
MT1451	30.0912	19.5437	23.9767	27.1279	1.02855	0.0406059	5.10384	0.0148118	0.903134	0.955583	Rv1407	fmu	similar to Fmu protein
MT1452	612.164	409.102	235.458	189.456	0.41607	-1.2651	8.43251	11.8478	0.000577303	0.0133147	Rv1408	rpe	ribulose-phosphate 3-epimerase
MT1453	132.099	91.412	51.2386	60.0132	0.49766	-1.00677	6.70983	8.06756	0.00450648	0.0513739	Rv1409	ribG	riboflavin biosynthesis
MT1454	1151.71	839.826	778.732	905.517	0.84569	-0.241799	10.0346	0.355188	0.551191	0.789394	Rv1410c	Rv1410c	probable drug efflux protein
MT1455	1172.98	884.458	1007.36	944.159	0.948515	-0.0762582	10.012	0.0393972	0.842664	0.929618	Rv1411c	lprG	lipoprotein
MT1456	58.033	47.1267	49.8733	61.1354	1.05519	0.0775037	5.86053	0.0695359	0.792014	0.913094	Rv1412	ribC	riboflavin synthase [alpha] chain
MT1457	20.1576	20.2368	23.5928	31.9095	1.3734	0.457749	4.6931	2.22981	0.13537	0.398324	Rv1414	Rv1414	hypothetical protein
MT1458	963.674	808.917	601.211	557.977	0.65395	-0.612748	9.51614	2.73784	0.0979974	0.33563	Rv1415	ribA2	probable GTP cyclohydrolase II
MT1459	144.356	102.085	145.78	130.224	1.11984	0.163294	7.06304	0.195491	0.658385	0.849568	Rv1416	ribH	riboflavin synthase [beta] chain
MT1460	32.1244	34.3055	46.6736	45.3271	1.38504	0.469923	5.34681	2.10527	0.146793	0.417465	Rv1417	Rv1417	hypothetical protein
MT1461	52.4563	54.7502	72.9542	76.5047	1.39412	0.479355	6.01542	2.82792	0.0926384	0.327415	Rv1418	lprH	lipoprotein
MT1462	454.098	376.667	443.996	311.727	0.909675	-0.136578	8.80729	0.127542	0.720995	0.879381	Rv1419	Rv1419	hypothetical protein
MT1463	490.522	320.6	326.246	243.176	0.70201	-0.510438	8.41379	1.60537	0.205143	0.485685	Rv1420	uvrC	excinuclease ABC subunit C
MT1464	158.647	133.826	115.02	102.071	0.742254	-0.430015	7.00582	1.375	0.240954	0.52598	Rv1421	Rv1421	conserved hypothetical protein
MT1465	99.2197	64.8686	73.8927	66.1121	0.853072	-0.229261	6.33661	0.421137	0.51637	0.763395	Rv1422	Rv1422	conserved hypothetical protein
MT1466	66.2239	49.5524	66.896	63.4774	1.12574	0.170876	6.03959	0.320187	0.571495	0.799532	Rv1423	Rv1423	putative transcriptional regulator
MT1467	49.2032	30.5631	29.9496	22.6879	0.659834	-0.599825	4.98749	1.79404	0.180434	0.460081
MT1468	172.24	118.094	84.0466	91.2396	0.603679	-0.728147	7.07087	3.73976	0.0531321	0.238236	Rv1425	Rv1425	conserved hypothetical protein
MT1469	92.2487	53.2255	79.7803	63.4286	0.984159	-0.0230366	6.27496	0.00445333	0.946794	0.97722	Rv1426c	lipO	probable esterase
MT1470	242.879	173.884	189.809	156.474	0.83085	-0.267341	7.6967	0.617539	0.431963	0.70329	Rv1427c	fadD12	acyl-CoA synthase
MT1471	137.908	154.895	140.277	142.422	0.965536	-0.0505973	7.2345	0.0275917	0.868072	0.939156	Rv1428c	Rv1428c	conserved hypothetical protein
MT1472	2532.31	2367.15	2525.28	1881.2	0.899382	-0.152994	11.1117	0.125106	0.723561	0.879381	Rv1429	Rv1429	conserved hypothetical protein
MT1474	144.995	159.469	252.225	179.845	1.41921	0.505091	7.36142	2.3892	0.122176	0.379954	Rv1430	PE	PE-family protein
MT1475	114.962	110.748	144.202	133.59	1.23073	0.299517	6.81117	0.928879	0.335154	0.61907	Rv1431	Rv1431	possible transporter
MT1476	14.5228	12.2668	16.7667	14.7837	1.17702	0.235138	3.89069	0.626876	0.428503	0.701475	Rv1432	Rv1432	putative dehydrogenase
MT1477	138.838	158.983	107.597	147.154	0.855368	-0.225383	6.97515	0.498385	0.48021	0.739213	Rv1433	Rv1433	possible membrane protein
MT1478	18.0663	17.6032	19.5824	23.1758	1.19818	0.260849	4.16536	0.805321	0.369507	0.651292
MT1479	232.771	280.127	105.336	193.116	0.581868	-0.781236	7.87618	4.23673	0.0395582	0.195181	Rv1435c	Rv1435c	conserved hypothetical protein
MT1480	488.256	524.146	353.55	388.281	0.732747	-0.448614	8.80187	1.66629	0.196756	0.47782	Rv1436	gap	glyceraldehyde 3-phosphate dehydrogenase
MT1481	450.439	461.01	265.707	305.823	0.627055	-0.673337	8.58667	3.92038	0.0477041	0.223666
MT1482	219.643	232.862	147.274	174.868	0.711903	-0.490247	7.65032	2.27385	0.131573	0.392945	Rv1438	tpi	triosephosphate isomerase
MT1484	10.6888	14.9004	18.8145	21.5169	1.57758	0.657715	4.05053	3.80796	0.0510095	0.23335	Rv1439c	Rv1439c	hypothetical protein
MT1485	183.917	218.446	271.765	264.107	1.33186	0.413447	7.95686	1.48264	0.223363	0.506373
MT1487	164.456	125.232	185.628	214.194	1.37999	0.464655	7.47408	2.05593	0.151615	0.422742	Rv1442	bisC	biotin sulfoxide reductase
MT1488	4.41493	3.81172	9.1726	9.90462	2.31162	1.2089	2.66052	15.7775	7.12435e-05	0.00296106
MT1489	55.7675	34.7906	72.5275	60.989	1.4736	0.559348	5.69168	2.93142	0.0868711	0.315784	Rv1443c	Rv1443c	hypothetical protein
MT1491	57.8588	51.0771	50.0013	55.866	0.971594	-0.0415741	5.75149	0.0214209	0.883638	0.946023	Rv1444c	Rv1444c	hypothetical protein
MT1492	70.5807	63.5518	55.4622	67.2831	0.914926	-0.128272	6.10315	0.175259	0.67548	0.858233	Rv1445c	devB	glucose-6-phosphate 1-dehydrogenase
MT1493	235.734	226.278	183.153	194.921	0.818311	-0.289279	7.78211	0.79744	0.37186	0.651982	Rv1446c	opcA	unknown function, may aid G6PDH
MT1494	575.509	538.562	377.399	411.993	0.708561	-0.497037	8.91636	2.08132	0.149111	0.419644	Rv1447c	zwf2	glucose-6-phosphate 1-dehydrogenase
MT1495	345.758	382.212	218.948	288.405	0.696936	-0.520903	8.29645	2.37357	0.123405	0.382286	Rv1448c	tal	transaldolase
MT1496	897.159	910.516	657.654	765.827	0.787463	-0.344716	9.74201	0.855855	0.354901	0.638438	Rv1449c	tkt	transketolase
MT1497.1	9.75931	8.31648	5.84487	8.00176	0.764236	-0.387909	3.14204	1.55865	0.211863	0.493126	Rv1450c	PE_PGRS	PE_PGRS-family protein
MT1497.2	2.32365	1.59399	2.47447	3.12264	1.41228	0.498029	1.39113	2.1087	0.146463	0.416825
MT1498	217.261	244.019	216.9	197.458	0.898318	-0.154702	7.80776	0.223798	0.636161	0.83871	Rv1451	ctaB	cytochrome c oxidase assembly factor
MT1499	4.70538	4.43546	3.54105	3.70813	0.792573	-0.335384	2.25911	0.938258	0.332726	0.618053
MT1500	63.5517	75.5414	64.9335	58.891	0.890431	-0.167424	5.89241	0.313105	0.575781	0.801873
MT1501	135.352	100.907	87.2463	84.6528	0.727506	-0.458969	6.7965	2.08168	0.149076	0.419644	Rv1454c	qor	Probable quinone oxidoreductase
MT1502	9.93358	9.49465	11.4338	11.1732	1.16324	0.21815	3.3372	0.560287	0.454145	0.720928	Rv1455	Rv1455	conserved hypothetical protein
MT1503	46.9376	48.3742	44.2418	36.4958	0.847296	-0.239062	5.57212	0.669028	0.413391	0.689273	Rv1456c	Rv1456c	probable membrane protein
MT1504	38.224	34.3748	28.627	37.1789	0.906003	-0.142412	5.44119	0.236372	0.626839	0.836204	Rv1457c	Rv1457c	probable membrane protein
MT1505	115.601	112.896	87.033	109.146	0.858493	-0.220122	6.94266	0.497036	0.480805	0.739558
MT1506	129.02	129.737	131.019	149.545	1.08424	0.116685	7.68224	0.130786	0.717619	0.879381	Rv1459c	Rv1459c	conserved hypothetical protein
MT1507	64.8297	78.6601	54.5663	70.2106	0.86962	-0.201543	6.39845	0.357409	0.549949	0.788223	Rv1460	Rv1460	putative transcriptional regulator
MT1508	841.915	1216.29	621.774	872.924	0.72622	-0.461521	9.89716	1.22861	0.267677	0.552409	Rv1461	Rv1461	conserved hypothetical protein
MT1509	154.987	167.924	117.537	164.426	0.873167	-0.19567	7.58802	0.295749	0.58656	0.80799
MT1510	176.016	209.645	125.345	188.676	0.814226	-0.296499	7.55221	0.718361	0.396682	0.674581	Rv1463	Rv1463	ABC-type transporter
MT1511	219.991	219.07	140.661	165.646	0.697625	-0.519475	7.68278	2.61632	0.105769	0.348489	Rv1464	Rv1464	NifS-like protein
MT1512	26.3153	39.2954	21.6303	30.8361	0.799901	-0.322107	5.1388	0.94677	0.330543	0.616869	Rv1465	Rv1465	conserved hypothetical protein
MT1513	74.3566	92.5902	59.6432	92.0691	0.908732	-0.138073	6.48365	0.157097	0.691843	0.866388	Rv1466	Rv1466	conserved hypothetical protein
MT1514	324.439	370.43	331.664	301.091	0.910636	-0.135054	8.63062	0.150229	0.698316	0.869084	Rv1467c	fadE15	acyl-CoA dehydrogenase
MT1514.1	40.3733	32.5036	48.5508	47.1323	1.3124	0.392207	5.69245	1.7736	0.182937	0.462559	Rv1468c	PE_PGRS	PE_PGRS-family protein
MT1515	82.199	86.6993	31.1015	35.3249	0.39331	-1.34626	6.38464	13.9603	0.000186711	0.00586469	Rv1469	ctpD	probable cadmium-transporting ATPase
MT1516	80.9209	82.056	96.1203	85.6286	1.11523	0.157346	6.38023	0.264151	0.607282	0.823609	Rv1470	trxA	thioredoxin
MT1517	80.34	177.973	183.836	221.951	1.57118	0.651849	7.22638	2.52975	0.111718	0.360642	Rv1471	trxB	thioredoxin reductase
MT1518	249.211	280.751	235.672	284.063	0.980705	-0.0281083	8.09594	0.00720446	0.932358	0.972485	Rv1472	echA12	enoyl-CoA hydratase/isomerase superfamily
MT1519	121.41	134.935	109.773	174.282	1.10804	0.148004	7.23188	0.194467	0.659225	0.849808	Rv1473	Rv1473	ABC transporter, possible in EF-3 subfamily
MT1520	6.39002	9.56396	9.81255	13.5152	1.46425	0.550163	3.37202	2.609	0.106259	0.349524
MT1521	50.0165	58.9084	58.7046	76.3583	1.24	0.310337	5.89383	0.93669	0.33313	0.618154	Rv1474c	Rv1474c	transcriptional regulator (TetR/AcrR family)
MT1522	691.575	993.057	858.342	1148.94	1.19153	0.252819	9.75989	0.399997	0.527091	0.77348	Rv1475c	acn	aconitate hydratase
MT1523	271.983	347.698	189.851	228.831	0.675658	-0.565634	8.03727	2.68641	0.101207	0.339837	Rv1476	Rv1476	hypothetical protein
MT1524	193.676	223.298	68.8158	117.197	0.446081	-1.16462	7.48603	7.83245	0.00513164	0.0564056	Rv1477	Rv1477	putative exported p60 protein homologue
MT1525	95.3856	124.817	36.5624	67.3807	0.471989	-1.08317	6.59998	8.26289	0.00404636	0.0484834
MT1526	890.421	1021.54	807.231	909.274	0.897775	-0.155575	9.87586	0.175227	0.675508	0.858233	Rv1479	moxR	transcriptional regulator, MoxR homologue
MT1527	104.157	93.7684	90.6167	102.901	0.977622	-0.0326513	6.93035	0.0112426	0.915558	0.962602	Rv1480	Rv1480	conserved hypothetical protein
MT1528	175.029	167.161	179.1	190.92	1.0813	0.112769	7.61102	0.114769	0.734779	0.883347	Rv1481	Rv1481	possible membrane protein
MT1529	4.29874	4.57407	4.90627	6.48923	1.28271	0.359192	2.10288	1.34871	0.245503	0.529617	Rv1482c	Rv1482c	conserved hypothetical protein
MT1530	717.077	803.996	930.741	705.229	1.07555	0.105076	9.44642	0.0782212	0.779723	0.907024	Rv1483	fabG1	3-oxoacyl-[ACP] reductase (aka MabA)
MT1531	205.294	213.872	214.255	276.841	1.17157	0.228449	7.86077	0.472345	0.49191	0.745429	Rv1484	inhA	enoyl-[ACP] reductase
MT1532	68.838	78.0363	77.6471	89.044	1.13497	0.182658	6.23394	0.38295	0.536028	0.778861	Rv1485	hemZ	ferrochelatase
MT1533	342.389	166.122	291.006	197.507	0.960626	-0.0579537	8.00621	0.0156353	0.900491	0.955183
MT1533.1	178.34	138.608	241.175	212.535	1.43138	0.517408	7.53324	2.4767	0.115545	0.368229
MT1533.2	537.459	441.12	660.342	622.723	1.31113	0.390806	9.06955	1.13903	0.285857	0.572104	Rv1488	Rv1488	conserved hypothetical protein
MT1534	108.398	93.7684	154.74	149.057	1.50256	0.587424	7.02328	3.46713	0.0625997	0.261034
MT1535	59.7177	58.4233	101.197	116.513	1.84258	0.881723	6.34686	9.3158	0.00227186	0.033626
MT1536	13.5933	18.5042	24.2754	20.4923	1.3966	0.481914	4.22817	2.49086	0.114509	0.365683	Rv1490	Rv1490	unknown putative membrane protein
MT1537	12.5477	10.5342	9.72722	9.85583	0.847605	-0.238535	3.55361	0.65499	0.418334	0.692641
MT1538	869.101	680.427	594.726	621.015	0.784577	-0.350012	9.58924	0.884886	0.346867	0.631098	Rv1491c	Rv1491c	probable membrane protein
MT1539	329.9	182.893	178.716	88.9952	0.522082	-0.937651	7.85412	2.96398	0.085138	0.312225	Rv1492	mutA	methylmalonyl-CoA mutase, [beta] subunit
MT1540	447.534	270.009	289.342	138.86	0.596774	-0.744743	8.20666	2.07731	0.149503	0.420378	Rv1493	mutB	methylmalonyl-CoA mutase, [alpha] subunit
MT1541	35.4356	32.2957	43.2179	31.324	1.10067	0.138378	5.14494	0.19821	0.656169	0.849047	Rv1494	Rv1494	hypothetical protein
MT1542	67.4438	76.0265	89.1235	62.2576	1.05542	0.0778149	6.29497	0.06598	0.797282	0.914037	Rv1495	Rv1495	conserved hypothetical protein
MT1543	86.3234	64.8686	63.4403	45.3759	0.719727	-0.474479	6.22138	2.24767	0.133816	0.396509
MT1545	520.206	363.43	178.588	200.727	0.429251	-1.22011	8.49572	11.9002	0.000561264	0.0131243	Rv1497	lipL	esterase
MT1546	120.249	222.466	252.524	267.278	1.51689	0.601119	7.57635	2.30467	0.128986	0.389889	Rv1498c	Rv1498c	methyltransferase
MT1547	72.2073	83.0262	94.3284	100.51	1.25523	0.327953	6.26485	1.23036	0.267338	0.55211
MT1548	15.3361	10.5342	12.2017	9.66067	0.844396	-0.244008	3.54292	0.54529	0.460249	0.725549	Rv1499	Rv1499	hypothetical protein
MT1549	204.713	350.332	207.898	200.288	0.735476	-0.44325	7.78269	1.36271	0.243069	0.52701	Rv1500	Rv1500	similarity to B. subtilis glycosyltransferase
MT1550	144.356	246.792	152.649	142.178	0.753859	-0.407634	7.34763	1.33025	0.248761	0.532877	Rv1501	Rv1501	conserved hypothetical protein
MT1551	104.971	143.667	118.86	116.66	0.947391	-0.077968	6.83346	0.063315	0.801331	0.916268	Rv1502	Rv1502	hypothetical protein
MT1553	13.5933	25.2267	34.3866	30.2506	1.6674	0.737598	4.51424	4.34891	0.0370327	0.187029	Rv1505c	Rv1505c	conserved hypothetical protein
MT1554	53.6181	63.5518	93.9871	70.2106	1.40172	0.487195	5.95335	2.37073	0.123629	0.382389	Rv1506c	Rv1506c	hypothetical protein
MT1555	115.776	195.715	228.504	200.581	1.37772	0.462278	7.20812	1.51072	0.21903	0.502257	Rv1507c	Rv1507c	hypothetical protein
MT1555.1	2.03319	2.98007	5.93019	3.80572	1.95721	0.968798	1.7139	7.64845	0.00568213	0.0604578
MT1556	450.613	486.584	412.383	407.7	0.875048	-0.192566	8.72844	0.329632	0.565876	0.797314	Rv1508c	Rv1508c	probable membrane protein
MT1557	89.2861	91.1348	85.1558	67.0392	0.843679	-0.245234	6.35104	0.709446	0.399628	0.677498	Rv1509	Rv1509	hypothetical protein
MT1558	30.6721	28.276	22.8248	21.4194	0.750553	-0.413974	4.86838	1.98116	0.159269	0.434957
MT1560	7.02903	6.23736	8.19134	6.63561	1.11744	0.160195	3.12738	0.246342	0.619663	0.83024	Rv1510	Rv1510	probable membrane proteinvery similar to
MT1560.1	6.15766	8.38579	8.19134	8.00176	1.11606	0.158415	3.22117	0.247528	0.618821	0.830227
MT1561	261.352	315.403	256.363	290.308	0.947862	-0.077251	8.09616	0.0553523	0.813999	0.920855	Rv1511	gmdA	GDP-mannose 4,6 dehydratase
MT1562	98.9292	114.144	82.4681	102.266	0.867013	-0.205875	6.69766	0.455685	0.499648	0.751166	Rv1512	epiA	nucleotide sugar epimerase
MT1563	108.863	133.618	101.453	115.196	0.893528	-0.162416	6.84157	0.255639	0.613132	0.827324	Rv1513	Rv1513	conserved hypothetical protein
MT1564	18.1825	23.6327	36.989	39.9112	1.84007	0.879759	4.74363	8.09341	0.00444265	0.0512817	Rv1514c	Rv1514c	involved in polysaccharide synthesis
MT1565	62.5641	82.6104	119.841	108.17	1.57093	0.651615	6.23806	4.01325	0.045144	0.216236	Rv1515c	Rv1515c	conserved hypothetical protein
MT1566	120.597	153.855	226.968	172.135	1.45435	0.540379	7.09056	2.59134	0.107449	0.351701	Rv1516c	Rv1516c	probable glucosyltransferase
MT1567	13.8257	11.4352	6.6128	8.05055	0.579869	-0.786202	3.41973	4.98507	0.025567	0.150018	Rv1517	Rv1517	conserved hypothetical protein
MT1568	8.82985	8.38579	19.9664	11.4171	1.82376	0.86692	3.4709	6.91566	0.0085444	0.0787494	Rv1518	Rv1518	involved in exopolysaccharide synthesis
MT1569	7.8423	9.28674	20.6063	32.2022	3.08213	1.62393	4.33715	9.05587	0.00261853	0.0375825	Rv1519	Rv1519	conserved hypothetical protein
MT1570	73.1948	79.4917	118.902	131.053	1.63706	0.71111	6.52966	5.07672	0.0242493	0.145059	Rv1520	Rv1520	glycosyltransferase
MT1571	1.3361	2.21773	2.73045	2.58594	1.51173	0.596197	1.23416	2.77743	0.0956017	0.332564
MT1572	570.978	667.398	396.768	347.54	0.601053	-0.734436	8.95807	4.43767	0.0351542	0.182769	Rv1521	fadD25	acyl-CoA synthase
MT1573	411.459	372.786	337.509	276.11	0.782439	-0.35395	8.35821	1.11343	0.291338	0.577754	Rv1522c	mmpL12	conserved large membrane protein
MT1574	116.763	118.579	60.2832	73.5772	0.568755	-0.814121	6.58132	7.6524	0.00566968	0.0604578	Rv1523	Rv1523	possible methyl-sterol transferase
MT1575	55.9999	69.0961	32.8507	40.7407	0.588327	-0.76531	5.65411	6.33324	0.0118496	0.0962199	Rv1524	Rv1524	possible rhamnosyl/glycosyl transferase
MT1576	48.448	41.9982	72.2715	58.9886	1.45104	0.53709	5.67196	3.46689	0.062609	0.261034	Rv1525	wbbl2	dTDP-rhamnosyl transferase
MT1577	30.0912	40.4043	70.7783	53.4264	1.76291	0.817962	5.34103	7.00052	0.00814858	0.0772277	Rv1526c	Rv1526c	possible rhamnosyl/glycosyl transferase
MT1579	2.14937	3.88103	11.2204	12.3442	3.93208	1.97529	2.47436	31.1789	2.35306e-08	4.08204e-06	Rv1528c	papA4	PKS-associated protein, unknown function
MT1580	92.3649	135.42	145.311	131.834	1.21692	0.283237	6.78924	0.729205	0.393141	0.671791	Rv1529	fadD24	acyl-CoA synthase
MT1581	9.12031	13.3757	23.1235	22.8831	2.04868	1.03469	3.91125	11.2159	0.000810994	0.0161145	Rv1530	adh	alcohol dehydrogenase (Zn)
MT1582	36.1908	55.2353	112.631	127.199	2.62424	1.3919	6.08943	18.0959	2.10057e-05	0.00114812	Rv1531	Rv1531	conserved hypothetical protein
MT1583	16.7302	17.1874	29.0963	33.2268	1.83707	0.877409	4.86577	9.03618	0.00264688	0.0376657	Rv1532c	Rv1532c	conserved hypothetical protein
MT1585	33.809	47.8891	50.1293	68.3077	1.44999	0.536042	6.16169	2.23241	0.135143	0.397948	Rv1534	Rv1534	transcriptional regulator (TetR/AcrR family)
MT1585.1	811.591	1341.1	865.125	2093.58	1.37442	0.458827	10.4152	0.716452	0.39731	0.674581
MT1586	200.589	612.093	427.827	1025.15	1.78793	0.838289	9.02268	2.03811	0.1534	0.425502	Rv1535	Rv1535	hypothetical protein
MT1587	412.331	603.292	457.35	678.881	1.11877	0.161911	9.03327	0.173285	0.677209	0.858648	Rv1536	ileS	isoleucyl-tRNA synthase
MT1589	30.1493	26.7514	20.8197	19.0774	0.701171	-0.512161	4.69049	2.25463	0.133216	0.396336	Rv1537	dinX	probable DNA-damage-inducible protein
MT1590	74.0662	67.9873	51.9212	45.3759	0.684974	-0.545878	5.9763	3.5531	0.0594342	0.254262	Rv1538c	ansA	L-asparaginase
MT1591	761.342	396.211	194.16	137.835	0.286816	-1.8018	8.57488	13.8566	0.000197304	0.00600949	Rv1539	lspA	lipoprotein signal peptidase
MT1592	369.053	206.734	107.639	98.7047	0.358366	-1.4805	7.91919	11.2141	0.000811784	0.0161145	Rv1540	Rv1540	conserved hypothetical protein
MT1593	60.8214	47.404	44.1138	44.5952	0.819464	-0.287248	5.57718	0.827367	0.363035	0.645503	Rv1541c	lprI	lipoprotein
MT1594	10.805	9.56396	11.6044	7.31869	0.929332	-0.105734	4.0157	0.0389584	0.843531	0.929618	Rv1542c	glbN	hemoglobin-like, oxygen carrier
MT1595	472.92	537.176	577.106	515.919	1.08212	0.113856	8.95696	0.098775	0.753305	0.893751
MT1596	160.622	157.736	159.603	187.358	1.08981	0.124071	7.52855	0.14953	0.698985	0.869373	Rv1544	Rv1544	probable ketoacyl reductase
MT1596.1	29.0456	27.0979	45.5643	49.0352	1.68441	0.752247	5.36636	6.87467	0.00874259	0.0798237
MT1597	57.8588	80.9471	77.8604	86.1165	1.1816	0.24074	6.24623	0.561484	0.453663	0.720587	Rv1546	Rv1546	conserved hypothetical protein
MT1598	778.886	961.732	1622.23	1514.09	1.80185	0.849481	9.99497	4.46062	0.0346849	0.18104	Rv1547	dnaE1	DNA polymerase III, [alpha] subunit
MT1599	99.3939	103.61	120.097	85.6286	1.01355	0.0194138	6.56999	0.00403359	0.94936	0.978545	Rv1548c	PPE	PPE-family protein
MT1600	18.8796	31.464	21.9289	27.4207	0.980857	-0.027885	4.34029	0.00548151	0.940981	0.975463	Rv1550	fadD11	acyl-CoA synthase, N-term
MT1601	8.24894	9.42535	20.0944	12.5393	1.84886	0.886634	3.31659	7.20283	0.00727885	0.0720661	Rv1551	plsB1	glycerol-3-phosphate acyltransferase
MT1603	6.27384	6.9304	6.91145	8.63605	1.17716	0.235306	2.53878	0.607647	0.435675	0.706833	Rv1552	frdA	fumarate reductase flavoprotein subunit
MT1604	1.91701	3.04938	3.02909	3.70813	1.36422	0.448079	1.49	1.65619	0.198119	0.479344	Rv1553	frdB	fumarate reductase iron sulphur protein
MT1607	39.6182	37.7707	44.3698	47.8642	1.19165	0.252957	5.6872	0.639029	0.424063	0.698007	Rv1556	Rv1556	putative transcriptional regulator
MT1608	21.0871	29.7314	35.0692	32.2998	1.32675	0.407901	6.37027	1.69753	0.192611	0.474232	Rv1557	mmpL6	conserved large membrane protein
MT1609	56.1741	58.0768	93.9018	107.39	1.76174	0.816998	6.31396	7.1924	0.0073213	0.0721815	Rv1558	Rv1558	conserved hypothetical protein
MT1610	323.742	382.835	315.921	347.345	0.938719	-0.0912341	8.42079	0.0740285	0.785559	0.911157	Rv1559	ilvA	threonine deaminase
MT1611	9.29458	11.5045	15.3588	18.7358	1.64017	0.713847	3.81222	5.29934	0.0213336	0.135119	Rv1560	Rv1560	conserved hypothetical protein
MT1612	17.3112	19.4744	26.7499	22.6391	1.34331	0.42579	4.39903	1.85217	0.173532	0.453136
MT1613	69.477	41.7903	86.2651	67.1855	1.37859	0.463192	6.01132	1.81465	0.177951	0.45808	Rv1562c	glgZ	maltooligosyltrehalose trehalohydrolase
MT1614	71.6845	46.4337	85.9238	64.2093	1.2707	0.345621	6.13398	0.996666	0.318119	0.602879	Rv1563c	glgY	putative [alpha]-amylase
MT1615	189.203	173.537	247.447	217.902	1.28285	0.35935	7.6359	1.23602	0.26624	0.551113	Rv1564c	glgX	probable glycogen debranching enzyme
MT1616	567.608	446.318	570.066	469.713	1.02549	0.0363075	9.07151	0.00978826	0.921189	0.964963	Rv1565c	Rv1565c	Unknown membrane protein
MT1617	210.348	277.008	90.0621	179.845	0.553804	-0.852552	7.99606	3.55447	0.0593854	0.254262	Rv1566c	Rv1566c	putative exported p60 protein homologue
MT1618	42.4065	61.9578	48.5508	54.0119	0.983077	-0.0246237	6.0014	0.0059373	0.938581	0.97499	Rv1567c	Rv1567c	hypothetical protein
MT1619	31.0788	25.6425	35.7518	43.8145	1.40179	0.487266	5.32663	2.70311	0.100153	0.339837	Rv1568	bioA	adenosylmethionine-8-amino-7-oxononanoate
MT1620	55.477	38.6023	25.214	30.5921	0.592876	-0.754198	5.75423	5.11505	0.0237191	0.143176	Rv1569	bioF	8-amino-7-oxononanoate synthase
MT1621	26.3734	11.7124	8.74597	11.6611	0.534978	-0.902448	4.56131	4.574	0.0324608	0.174318	Rv1570	bioD	dethiobiotin synthase
MT1622	4.12447	3.11868	1.91985	2.29319	0.578756	-0.788972	2.29421	5.41077	0.0200129	0.130297	Rv1571	Rv1571	conserved hypothetical protein
MT1622.1	39.6182	23.7713	57.3394	51.0844	1.70911	0.773242	5.10995	4.91812	0.0265765	0.153681	Rv1587c	Rv1587c	REP-family protein
MT1623	159.112	82.8183	145.524	127.199	1.12705	0.172546	6.86227	0.222244	0.637336	0.83871
MT1624	168.639	223.506	196.976	289.527	1.24065	0.311092	7.75261	0.694489	0.404642	0.682603	Rv1589	bioB	biotin synthase
MT1625	59.5434	86.5607	67.7492	86.0677	1.05297	0.0744672	6.14642	0.0502016	0.822713	0.923468	Rv1590	Rv1590	conserved hypothetical protein
MT1626	22.6555	24.0485	20.7343	34.1051	1.17365	0.231004	4.72993	0.524723	0.468834	0.732725	Rv1591	Rv1591	conserved hypothetical protein
MT1627	18.8796	21.6922	34.6426	20.8827	1.3697	0.453862	4.51971	1.92839	0.164934	0.439533
MT1628	574.579	521.097	878.436	456.344	1.21824	0.284797	9.03639	0.525738	0.468404	0.732659	Rv1592c	Rv1592c	conserved hypothetical protein
MT1629	371.319	324.135	270.016	226.147	0.713443	-0.487129	8.07088	1.18322	0.276701	0.560424	Rv1593c	Rv1593c	conserved hypothetical protein
MT1630	1194.35	1701.41	867.301	992.023	0.642089	-0.639155	10.1755	2.50667	0.113365	0.364135	Rv1594	nadA	quinolinate synthase
MT1631	786.089	713.832	405.173	545.681	0.633927	-0.657611	9.52704	2.96884	0.0848827	0.311862	Rv1595	nadB	L-aspartate oxidase
MT1632	353.891	467.802	269.973	362.616	0.76987	-0.377312	8.5496	1.16639	0.280145	0.565391	Rv1596	nadC	nicotinate-nucleotide pyrophosphatase
MT1633	124.896	130.361	123.681	136.03	1.01744	0.0249489	6.99734	0.0067908	0.934324	0.973563	Rv1597	Rv1597	hypothetical protein
MT1634	88.2985	87.0459	94.9684	88.4097	1.04583	0.0646523	6.60165	0.0496065	0.823749	0.923468	Rv1598c	Rv1598c	conserved hypothetical protein
MT1635	583.235	314.086	325.819	165.988	0.548092	-0.867511	8.63386	3.36107	0.0667549	0.270704	Rv1599	hisD	histidinol dehydrogenase
MT1636	620.007	484.297	407.946	234.735	0.581992	-0.780929	8.76103	3.32351	0.068296	0.27387	Rv1600	hisC	histidinol-phosphate aminotransferase
MT1637	555.758	483.95	392.545	217.17	0.58645	-0.769919	8.5386	3.76809	0.0522394	0.236609	Rv1601	hisB	imidazole glycerol-phosphate dehydratase
MT1638	174.331	177.141	154.612	96.1187	0.713446	-0.487123	7.27645	1.74247	0.186826	0.467358	Rv1602	hisH	amidotransferase
MT1639	102.879	85.036	90.0195	55.3293	0.773544	-0.370445	6.4253	0.95733	0.327861	0.613585	Rv1603	hisA	phosphoribosylformimino-5-aminoimidazole
MT1640	233.352	176.24	238.658	105.926	0.841319	-0.249276	7.49553	0.331263	0.564916	0.797035	Rv1604	impA	impA, inositol monophosphatasemonophosphtase
MT1641	134.365	94.3921	135.285	64.0141	0.871259	-0.198826	6.79668	0.223503	0.636384	0.83871	Rv1605	hisF	imidazole glycerol-phosphate synthase
MT1641.1	44.6721	32.8501	48.8068	31.6167	1.03732	0.0528555	5.25823	0.0239212	0.877086	0.943894	Rv1606	hisI2	probable phosphoribosyl-AMP 1,6 cyclohydrolase
MT1642	59.892	61.2648	60.4965	51.8163	0.927134	-0.10915	5.86744	0.14352	0.704806	0.872804	Rv1607	chaA	putative calcium/proton antiporter
MT1643	325.775	231.753	213.53	194.921	0.732584	-0.448934	7.92553	1.56301	0.211225	0.49257	Rv1608c	bcpB	probable bacterioferritin comigratory protein
MT1644	270.821	267.444	309.565	272.304	1.08102	0.112389	8.0679	0.120103	0.728923	0.880619	Rv1609	trpE	anthranilate synthase component I
MT1645	36.4812	31.9492	40.1888	42.7411	1.21145	0.27673	5.35517	0.938299	0.332716	0.618053	Rv1610	Rv1610	possible membrane protein
MT1646	679.55	684.377	719.26	565.93	0.94228	-0.0857719	9.37352	0.0541877	0.81593	0.92105	Rv1611	trpC	indole-3-glycerol phosphate synthase
MT1647	602.812	790.482	676.682	523.14	0.861164	-0.215639	9.25106	0.337499	0.561277	0.795536	Rv1612	trpB	tryptophan synthase [beta] chain
MT1648	173.983	161.132	145.311	125.833	0.809119	-0.305576	7.20784	0.910585	0.339959	0.623363	Rv1613	trpA	tryptophan synthase [alpha] chain
MT1649	522.878	456.714	423.817	333.83	0.773436	-0.370646	8.69931	1.08236	0.298169	0.585192	Rv1614	lgt	prolipoprotein diacylglyceryl transferase
MT1650	7.55185	7.90066	10.4952	9.4655	1.29232	0.369963	3.02807	1.28133	0.257652	0.542496
MT1651	440.912	391.36	519.297	390.379	1.09301	0.1283	8.66034	0.138975	0.709302	0.874842
MT1652	81.7923	72.492	75.7699	76.1143	0.984344	-0.0227658	6.19901	0.00574577	0.939578	0.97501	Rv1616	Rv1616	conserved hypothetical protein
MT1653	318.746	362.321	355.214	351.199	1.03724	0.0527434	8.34557	0.0245361	0.875529	0.943182	Rv1617	pykA	pyruvate kinase
MT1654	356.563	409.587	428.68	461.955	1.16249	0.217222	8.58546	0.360384	0.548293	0.787352	Rv1618	tesB1	thioesterase II
MT1655	38.8049	34.5134	40.5301	35.3736	1.03517	0.0498725	5.13427	0.028763	0.865327	0.937712	Rv1619	Rv1619	conserved hypothetical protein
MT1656	173.576	93.4911	142.026	52.1578	0.727124	-0.459727	7.21287	1.00315	0.316549	0.602542	Rv1620c	cydC	ABC transporter
MT1657	278.257	168.547	175.346	80.7983	0.573307	-0.802619	7.82332	2.88928	0.0891708	0.321336	Rv1621c	cydD	ABC transporter
MT1658	631.334	475.703	288.19	161.304	0.406051	-1.30027	8.78761	8.68333	0.00321134	0.0423218	Rv1622c	cydB	cytochrome d ubiquinol oxidase subunit II
MT1659	3429.18	2108.09	1219.44	547.974	0.319189	-1.64752	10.8807	9.03269	0.00265193	0.0376657	Rv1623c	appC	cytochrome bd-II oxidase subunit I
MT1660	64.3069	66.8784	43.6018	42.9851	0.660097	-0.59925	6.0946	3.51717	0.0607361	0.256985	Rv1624c	Rv1624c	possible membrane protein
MT1661	738.048	438.556	440.029	258.301	0.593517	-0.75264	8.89069	2.11597	0.145769	0.415146	Rv1625c	Rv1625c	C-term similar eukaryotic adenylate/guanylate cyclases
MT1662	392.057	508.9	449.116	401.162	0.943782	-0.0834748	8.85242	0.0547023	0.815074	0.92105	Rv1626	Rv1626	two-component response regulator
MT1663	233.178	226.347	209.861	169.257	0.825043	-0.277458	7.82706	0.597867	0.439393	0.710047	Rv1627c	Rv1627c	lipid carrier protein
MT1664	152.78	136.737	123.083	97.3873	0.761534	-0.39302	7.02954	0.904259	0.341642	0.62444	Rv1628c	Rv1628c	conserved hypothetical protein
MT1665	530.023	381.449	307.389	265.278	0.628281	-0.670517	8.62316	2.98677	0.0839474	0.309721	Rv1629	polA	DNA polymerase I
MT1666	1558	2269.98	2058.59	1975.22	1.05377	0.0755635	10.848	0.0316869	0.858717	0.933761	Rv1630	rpsA	30S ribosomal protein S1
MT1667	163.236	151.776	185.969	167.061	1.12068	0.164368	7.32357	0.282768	0.594893	0.813291	Rv1631	Rv1631	conserved hypothetical protein
MT1668	158.415	171.458	436.061	252.495	2.08743	1.06173	7.73605	8.98642	0.00271994	0.0382132	Rv1632c	Rv1632c	hypothetical protein
MT1669	995.392	684.862	585.126	428.924	0.603511	-0.728549	9.38249	3.11845	0.0774105	0.295342	Rv1633	uvrB	excinuclease ABC subunit B
MT1670	125.361	82.3332	77.3485	62.16	0.671665	-0.574187	6.68248	2.09793	0.147498	0.417685	Rv1634	Rv1634	probable drug efflux protein
MT1671	328.97	193.081	236.696	149.594	0.739936	-0.434527	8.0662	0.957962	0.327701	0.613574	Rv1635c	Rv1635c	unknown membrane protein
MT1672	402.281	475.079	253.206	231.466	0.552442	-0.856104	8.75954	5.88759	0.0152479	0.111429	Rv1636	Rv1636	conserved hypothetical protein
MT1673	123.502	135.42	109.175	138.567	0.956806	-0.0637019	7.07778	0.0414048	0.838759	0.928572	Rv1637c	Rv1637c	conserved hypothetical protein
MT1675	708.886	572.451	390.582	432.729	0.642532	-0.63816	9.16964	2.81908	0.0931495	0.328038	Rv1638	uvrA	excinuclease ABC subunit A
MT1676	75.4604	123.153	130.763	146.91	1.39828	0.483657	6.74266	1.63839	0.200547	0.481456
MT1677	257.518	249.564	313.618	414.628	1.4361	0.522155	8.30474	2.40358	0.121058	0.378246	Rv1639c	Rv1639c	conserved hypothetical protein
MT1678	191.352	199.665	486.958	358.713	2.16278	1.11289	7.98179	10.6154	0.00112152	0.0202482
MT1679	1066.5	1822.49	1914.64	1533.9	1.1937	0.255441	10.4612	0.326408	0.567782	0.797975	Rv1641	infC	initiation factor IF-3
MT1680	122.979	190.863	208.879	233.027	1.40817	0.493827	7.59598	1.65179	0.198715	0.479523
MT1681	249.327	403.003	403.552	527.824	1.42782	0.513812	8.57393	1.65718	0.197985	0.479344	Rv1643	rplT	50S ribosomal protein L20
MT1682	56.2322	70.3436	90.5314	115.196	1.62544	0.700831	6.49301	3.94928	0.0468915	0.220937	Rv1644	tsnR	putative 23S rRNA methyltransferase
MT1683	187.867	182.408	99.1494	106.219	0.554635	-0.850389	7.65001	6.66388	0.00983865	0.0862774	Rv1645c	Rv1645c	conserved hypothetical protein
MT1684	209.477	217.06	147.913	152.473	0.704255	-0.50583	7.70994	2.4989	0.113926	0.36482	Rv1646	PE	PE-family protein
MT1685	115.485	114.074	228.718	173.111	1.75046	0.807733	7.36285	6.30307	0.0120529	0.0973502	Rv1647	Rv1647	conserved hypothetical protein
MT1686	153.186	138.677	277.311	210.241	1.67045	0.740234	7.64822	4.78714	0.028673	0.16085	Rv1648	Rv1648	possible membrane protein
MT1687	83.3027	134.658	158.366	162.914	1.47429	0.56002	6.89196	2.46818	0.116172	0.369345	Rv1649	pheS	phenylalanyl-tRNA synthase [alpha] subunit
MT1688	103.46	126.896	156.873	194.823	1.52681	0.610524	7.11554	3.48624	0.0618812	0.259355	Rv1650	pheT	phenylalanyl-tRNA synthase [beta] subunit
MT1689	119.203	99.5899	102.605	131.444	1.06955	0.0970011	6.93411	0.0948012	0.75816	0.897643	Rv1651c	PE_PGRS	PE_PGRS-family protein
MT1690	161.61	112.342	75.3006	93.0937	0.614576	-0.702336	6.83335	4.35556	0.0368884	0.186819	Rv1652	argC	N-acetyl-[gamma]-glutamyl-phosphate reductase
MT1691	178.63	102.362	63.1416	70.7961	0.476566	-1.06925	6.88447	9.77413	0.00176985	0.0279243
MT1692	142.788	82.5411	57.1261	67.4783	0.552841	-0.855064	6.62808	6.20286	0.0127544	0.100714	Rv1654	argB	acetylglutamate kinase
MT1693	164.456	90.9269	62.5443	72.2598	0.527731	-0.922127	6.78285	6.85979	0.00881571	0.0803075	Rv1655	argD	acetylornithine aminotransferase
MT1694	115.543	88.224	51.5372	59.4765	0.544709	-0.876443	6.26742	7.38154	0.00658968	0.0670735	Rv1656	argF	ornithine carbamoyltransferase
MT1695	10.5145	6.23736	4.94894	6.00132	0.651163	-0.618908	3.21371	3.46955	0.0625082	0.261034	Rv1657	argR	arginine repressor
MT1696	215.809	179.567	140.49	172.038	0.790399	-0.339348	7.53018	1.02091	0.312302	0.59705	Rv1658	argG	arginosuccinate synthase
MT1697	81.9666	63.2746	62.203	64.5996	0.87284	-0.196211	6.17071	0.429517	0.512226	0.762581	Rv1659	argH	arginosuccinate lyase
MT1698	177.991	190.933	164.296	161.45	0.882991	-0.179529	7.4067	0.333221	0.563769	0.796683	Rv1660	pks10	polyketide synthase (chalcone synthase-like)
MT1701	178.049	149.766	205.722	161.157	1.11914	0.162392	7.40782	0.247115	0.619114	0.83024	Rv1661	pks7	polyketide synthase
MT1702	85.7425	90.7883	188.017	147.106	1.89848	0.924846	6.70655	8.66547	0.00324296	0.0425638	Rv1662	pks8	polyketide synthase
MT1703	45.6015	37.2163	173.81	93.484	3.22677	1.69009	6.12083	24.195	8.70569e-07	8.90659e-05	Rv1663	pks17	polyketide synthase
MT1704	42.4065	53.3641	140.021	108.219	2.59281	1.37452	6.08839	20.453	6.11133e-06	0.000443349	Rv1664	pks9	polyketide synthase
MT1705	50.5974	69.3733	46.4603	40.3016	0.723551	-0.466832	5.4545	2.43092	0.118963	0.374439	Rv1665	pks11	polyketide synthase (chalcone synthase-like)
MT1706	114.207	115.045	62.331	64.4532	0.553051	-0.854516	6.54969	8.05256	0.00454395	0.0516534	Rv1666c	Rv1666c	Probable cytochrome p450
MT1707	158.415	99.4513	79.1403	73.382	0.591412	-0.757765	6.82918	4.78534	0.0287031	0.16085	Rv1668c	Rv1668c	probable ABC transporter
MT1708	9.64313	11.3659	11.6897	14.8325	1.26263	0.336434	3.55823	1.06636	0.301769	0.588564	Rv1670	Rv1670	conserved hypothetical protein
MT1709	8.48131	7.69275	11.6044	12.2954	1.47601	0.561704	3.30975	3.29268	0.0695895	0.277108	Rv1671	Rv1671	similar to many mercuric transport proteins
MT1710	255.95	163.627	318.268	224.586	1.29375	0.371561	7.6186	0.699414	0.402981	0.680446	Rv1672c	Rv1672c	probable ABC transporter
MT1711	7.72612	10.95	17.7479	21.0778	2.08202	1.05799	3.74331	11.5449	0.000679342	0.014573	Rv1673c	Rv1673c	conserved hypothetical protein
MT1712	2.55601	2.91077	3.02909	5.36704	1.53201	0.615423	2.05434	2.96017	0.0853388	0.312674	Rv1674c	Rv1674c	putative transcriptional regulator
MT1714	5.17011	5.1285	9.64189	9.12396	1.82143	0.865073	2.90417	8.2106	0.00416463	0.0492384	Rv1675c	Rv1675c	putative transcriptional regulator
MT1715	263.095	250.673	390.667	317.826	1.37902	0.463639	8.07901	1.85312	0.173421	0.453136	Rv1676	Rv1676	possible cytochrome P450
MT1716	172.589	204.1	352.228	295.529	1.71969	0.78215	7.75527	5.66386	0.017318	0.119342	Rv1677	dsbF	highly similar to C-term Mpt53
MT1717	4.24065	4.85128	13.3536	11.6123	2.74924	1.45903	3.06097	22.2209	2.4302e-06	0.00020201
MT1718	349.592	382.766	431.027	283.721	0.975992	-0.0350585	8.34634	0.00944399	0.922583	0.96617	Rv1678	Rv1678	probably integral membrane protein
MT1719	70.8712	56.5521	73.6368	64.5508	1.08429	0.116749	6.0685	0.156712	0.692202	0.866388	Rv1679	fadE16	acyl-CoA dehydrogenase
MT1720	41.2447	46.8495	56.4008	59.5741	1.31665	0.396873	5.64621	1.81576	0.177819	0.458036	Rv1680	Rv1680	hypothetical protein
MT1721	37.7592	41.8596	42.2793	48.3033	1.13776	0.186195	5.35085	0.424512	0.514694	0.762581	Rv1681	moeX	weak similarity to E. coli MoaA
MT1722	10.6307	21.6229	29.651	34.1539	1.98113	0.986321	4.29196	6.93482	0.00845335	0.0782573	Rv1682	Rv1682	conserved hypothetical protein
MT1723	760.878	697.129	934.325	698.691	1.12004	0.163544	9.42115	0.18869	0.664009	0.852831	Rv1683	Rv1683	possible acyl-CoA synthase
MT1724	19.4024	18.5735	30.6322	36.935	1.77838	0.830562	4.69035	7.15016	0.00749573	0.0727687	Rv1684	Rv1684	conserved hypothetical protein
MT1725	10.7469	11.5045	7.46607	12.4418	0.893663	-0.162197	3.41059	0.249581	0.61737	0.829665	Rv1685c	Rv1685c	conserved hypothetical protein
MT1726	31.6597	44.5625	20.2224	33.1293	0.699959	-0.514657	4.82396	2.41299	0.120333	0.376847	Rv1686c	Rv1686c	probable transmembrane protein
MT1727	44.5559	39.5033	24.2327	31.9583	0.668199	-0.581651	5.01681	3.35453	0.0670204	0.271208	Rv1687c	Rv1687c	probable ABC transporter
MT1727.1	5.8672	5.54432	7.16743	9.70946	1.47582	0.561512	2.93696	3.15888	0.0755151	0.29168	Rv1688	Rv1688	probable 3-methylpurine DNA glycosylase
MT1728	86.3815	80.8085	109.645	118.709	1.3657	0.449644	6.47667	2.21309	0.136844	0.400594	Rv1689	tyrS	tyrosyl-tRNA synthase
MT1729	65.8173	63.7597	42.4926	37.862	0.6202	-0.689194	6.09713	4.11205	0.0425787	0.206606	Rv1690	lprJ	lipoprotein
MT1730	19.112	19.821	22.0996	24.1029	1.18665	0.246888	4.63885	0.55144	0.45773	0.72341
MT1731	35.726	34.7213	33.1493	41.7653	1.06313	0.0883138	5.25383	0.0826888	0.773686	0.902898	Rv1692	Rv1692	probable hydrolase
MT1732	12.3153	14.6232	14.5908	21.4194	1.33665	0.418626	4.0578	1.79407	0.180431	0.460081	Rv1693	Rv1693	hypothetical protein
MT1733	57.7426	48.9286	49.916	50.6453	0.942516	-0.0854113	5.80734	0.0869925	0.768036	0.90081	Rv1694	tlyA	cytotoxin/hemolysin homologue
MT1734	103.925	105.204	96.2483	82.1157	0.852964	-0.229443	6.57296	0.623033	0.429922	0.701767	Rv1695	Rv1695	conserved hypothetical protein
MT1735	92.8877	66.1854	85.7105	77.6757	1.02689	0.038278	6.37552	0.0154499	0.90108	0.955183	Rv1696	recN	recombination and DNA repair
MT1736	627.326	656.24	504.322	594.033	0.855704	-0.224816	9.39448	0.402413	0.525846	0.772661
MT1737	265.825	218.862	170.525	186.822	0.737239	-0.439797	7.91241	1.70131	0.192116	0.474017	Rv1698	Rv1698	conserved hypothetical protein
MT1738	1260.05	1291.2	1648	1312.24	1.16031	0.214508	10.2377	0.297553	0.585421	0.80799	Rv1699	pyrG	CTP synthase
MT1739	137.386	162.795	207.215	197.702	1.349	0.431893	7.27495	1.96901	0.160553	0.434957	Rv1700	Rv1700	conserved hypothetical protein
MT1740	127.103	126.48	187.932	166.964	1.39953	0.484941	7.15465	2.36734	0.123898	0.382922	Rv1701	Rv1701	integrase/recombinase
MT1741	117.46	52.3245	68.3465	104.755	1.01916	0.0273876	6.26892	0.0039648	0.949793	0.978738	Rv1702c	Rv1702c	REP-family protein
MT1743	351.8	306.324	352.313	319.778	1.02121	0.0302768	8.43485	0.0083673	0.927117	0.969137	Rv1703c	Rv1703c	putative methyltransferase
MT1744	147.958	234.733	139.21	191.213	0.863469	-0.211784	7.6711	0.295978	0.586415	0.80799	Rv1704c	cycA	transport of D-alanine, D-serine and glycine
MT1745	13.0705	14.4152	14.2069	19.175	1.21418	0.279978	3.89229	0.886242	0.346498	0.630715	Rv1705c	PPE	PPE-family protein
MT1746	17.0207	18.5735	21.161	20.8339	1.18012	0.238934	4.30885	0.56901	0.450653	0.718666	Rv1706c	PPE	PPE-family protein
MT1746.1	19.8091	12.7519	40.7007	23.2246	1.96189	0.972245	4.22429	4.81163	0.0282683	0.159084
MT1748	208.547	233.97	243.394	215.413	1.03686	0.0522154	7.77255	0.0254642	0.873216	0.942802
MT1749	189.261	184.072	215.62	175.941	1.04885	0.0688091	7.52032	0.0458864	0.830382	0.924965	Rv1708	Rv1708	possible role in chromosome partitioning
MT1750	104.099	115.391	141.471	96.3139	1.08351	0.115719	6.74301	0.133046	0.715294	0.878	Rv1709	Rv1709	conserved hypothetical protein
MT1751	66.6886	72.3534	71.6743	78.3587	1.07908	0.109802	6.27494	0.145895	0.702489	0.871559	Rv1710	Rv1710	conserved hypothetical protein
MT1751.1	45.5434	52.9483	45.735	47.6202	0.948018	-0.0770133	5.64056	0.0681109	0.794107	0.913094	Rv1711	Rv1711	conserved hypothetical protein
MT1752	42.5227	36.246	55.8462	53.6216	1.38932	0.474376	5.50533	2.75728	0.0968126	0.334762	Rv1712	cmk	cytidylate kinase
MT1753	74.5309	53.0869	70.3944	73.5284	1.12735	0.172929	6.17284	0.33137	0.564854	0.797035	Rv1713	Rv1713	conserved hypothetical protein
MT1753.1	4.76347	6.99971	9.85521	7.36748	1.46993	0.555748	2.70123	2.80519	0.0939598	0.329437
MT1754	3.54356	3.95033	8.40466	6.0989	1.93919	0.955454	2.3072	8.15473	0.00429489	0.049961	Rv1715	fadB3	3-hydroxyacyl-CoA dehydrogenase
MT1755	8.71367	8.87092	13.6949	14.1007	1.58035	0.660243	3.3001	5.02097	0.0250421	0.148021	Rv1716	Rv1716	conserved hypothetical protein
MT1756	1.9751	1.59399	2.68778	3.3178	1.66899	0.738976	1.20316	4.36838	0.0366117	0.186566	Rv1717	Rv1717	conserved hypothetical protein
MT1758	4.76347	4.08894	5.29024	5.95253	1.26666	0.34103	2.47886	1.05819	0.303629	0.59021
MT1760	2.43983	2.42564	5.84487	3.22022	1.86731	0.900959	1.73594	6.16995	0.0129938	0.101857
MT1761	8.59749	13.5836	16.596	14.8813	1.42181	0.507729	3.79598	2.09082	0.148186	0.418446	Rv1720c	Rv1720c	conserved hypothetical protein
MT1762	6.79666	6.30667	8.66064	7.51385	1.23409	0.303451	2.89774	0.851153	0.356226	0.639381	Rv1721c	Rv1721c	hypothetical protein
MT1763	76.2737	60.2252	36.9464	40.3016	0.565802	-0.821632	6.0475	6.96871	0.00829473	0.0778329	Rv1722	Rv1722	possible biotin carboxylase
MT1764	9.06222	6.99971	5.41823	5.46462	0.676696	-0.563421	3.26138	2.70624	0.0999566	0.339837	Rv1723	Rv1723	6-aminohexanoate-dimer hydrolase
MT1765	20.6804	30.5631	60.0272	52.6945	2.20168	1.1386	5.02398	13.77	0.000206605	0.00624511	Rv1724c	Rv1724c	hypothetical protein
MT1766	75.6927	32.365	70.1384	44.5952	1.06148	0.086079	5.7215	0.0330951	0.855645	0.933761	Rv1725c	Rv1725c	conserved hypothetical protein
MT1767	3.89211	2.63355	3.02909	1.75648	0.73397	-0.446206	1.56983	1.47417	0.224689	0.507649	Rv1726	Rv1726	6-hydroxy-d-nicotine oxidase
MT1768	2.49792	2.91077	2.60246	3.26901	1.08576	0.118704	1.61438	0.124117	0.724612	0.879692	Rv1727	Rv1727	conserved hypothetical protein
MT1769	152.257	166.399	260.118	228.538	1.53355	0.616874	7.31985	3.88013	0.0488608	0.226955	Rv1728c	Rv1728c	conserved hypothetical protein
MT1770	60.3567	84.8281	246.423	184.528	2.96893	1.56994	6.76095	20.3235	6.53919e-06	0.000465917	Rv1729c	Rv1729c	conserved hypothetical protein
MT1771	161.726	132.301	168.861	147.008	1.07423	0.103309	7.22634	0.0932709	0.760059	0.898559	Rv1730c	Rv1730c	probable penicillin binding protein
MT1772	262.63	368.351	493.528	684.151	1.86646	0.900308	8.70409	5.36886	0.0204993	0.132136	Rv1731	gabD1	succinate-semialdehyde dehydrogenase
MT1773	212.381	191.764	182.001	190.139	0.920779	-0.119074	7.47844	0.137555	0.710724	0.875784	Rv1732c	Rv1732c	conserved hypothetical protein
MT1774	1869.49	2195.34	902.968	683.419	0.390276	-1.35743	9.7699	8.59844	0.00336451	0.0433044	Rv1733c	Rv1733c	possible membrane protein
MT1775	1844.86	680.427	2651.18	505.868	1.25017	0.322123	10.0186	0.229058	0.632223	0.837507
MT1776	35.4356	16.633	20.0944	13.9055	0.652807	-0.615272	4.00202	1.591	0.207184	0.487531	Rv1735c	Rv1735c	hypothetical protein
MT1777	92.3068	61.542	29.9923	24.298	0.352925	-1.50257	5.17278	7.98607	0.00471386	0.0531513
MT1778	8887.94	3684.06	1142.05	797.834	0.154303	-2.69616	11.3632	14.609	0.000132283	0.00443538	Rv1736c	narX	fused nitrate reductase
MT1779	2582.56	1008.3	320.913	242.005	0.156767	-2.67331	9.64426	16.4086	5.10533e-05	0.00234141	Rv1737c	narK2	nitrite extrusion protein
MT1780	11882.1	9299.91	710.343	427.899	0.0537373	-4.21793	11.8767	38.1279	6.62557e-10	2.40327e-07	Rv1738	Rv1738	conserved hypothetical protein
MT1781	46.8795	42.7606	70.565	63.8189	1.49896	0.583966	5.43621	3.72658	0.0535531	0.239012	Rv1739c	Rv1739c	possible sulphate transporter
MT1782	25.5601	19.0586	23.2088	19.2237	0.950539	-0.0731824	4.24998	0.0572962	0.810822	0.919353	Rv1740	Rv1740	conserved hypothetical protein
MT1783	58.4978	37.7014	46.5456	35.8128	0.85591	-0.22447	5.37296	0.426197	0.513861	0.762581
MT1784	42.9874	29.7314	31.1868	28.6892	0.823059	-0.280932	4.86419	0.702466	0.401956	0.679003	Rv1742	Rv1742	hypothetical protein
MT1785	253.219	226.693	153.374	154.278	0.641051	-0.641489	7.54659	3.88054	0.0488489	0.226955	Rv1743	pknE	serine-threonine protein kinase
MT1786	3.13692	3.04938	3.49839	3.02506	1.05544	0.0778432	1.74613	0.0597475	0.806895	0.918549	Rv1744c	Rv1744c	hypothetical protein
MT1787	13.5352	12.1975	10.8791	9.31913	0.785047	-0.349149	3.51543	1.43771	0.23051	0.514208	Rv1745c	Rv1745c	conserved hypothetical protein
MT1788	147.319	97.9959	113.527	126.125	0.976719	-0.0339851	7.00303	0.0107455	0.917439	0.963093	Rv1746	pknF	serine-threonine protein kinase
MT1789	1132.43	698.238	808.426	691.128	0.819119	-0.287855	9.70818	0.512718	0.473965	0.734733
MT1791	62.1575	30.3552	28.3284	20.6387	0.529204	-0.918105	5.15792	5.45287	0.0195362	0.127996	Rv1748	Rv1748	hypothetical protein
MT1792	123.386	160.647	186.822	221.61	1.43807	0.524137	7.24558	2.67849	0.101712	0.339837	Rv1749c	Rv1749c	possible integral membrane protein
MT1793	131.17	130.084	191.387	158.279	1.33844	0.420555	7.02627	1.76675	0.183785	0.463529	Rv1750c	fadD1	acyl-CoA synthase
MT1794	425.401	347.144	367.075	290.552	0.851243	-0.232356	8.46945	0.429691	0.51214	0.762581	Rv1751	Rv1751	possible hydroxylasehyroxylase
MT1795	28.058	17.6725	25.5126	22.5416	1.04981	0.0701267	4.65611	0.0472421	0.827934	0.923601	Rv1752	Rv1752	hypothetical protein
MT1796	56.116	60.0173	37.373	35.6176	0.628624	-0.669731	5.47233	5.00055	0.0253393	0.149121	Rv1753c	PPE	PPE-family protein
MT1797	130.589	158.914	39.0795	51.7675	0.31381	-1.67204	6.68714	16.5526	4.73181e-05	0.00219534
MT1798	22.6555	30.0086	44.6684	32.5925	1.46788	0.553733	4.84128	2.23517	0.134902	0.397727
MT1799	102.357	93.6991	67.2373	68.3565	0.691586	-0.53202	6.29949	2.87994	0.0896893	0.322219	Rv1755c	plcD	partial CDS for phospholipase C
MT1801	44.0912	48.5821	89.5502	52.6945	1.53528	0.618502	5.56366	3.11317	0.0776617	0.295678
MT1802	501.559	419.636	420.105	321.778	0.805352	-0.312309	8.72215	0.802412	0.370373	0.6519
MT1803	24.3983	20.5833	21.3316	18.1991	0.87868	-0.186591	4.36303	0.384985	0.534947	0.77814
MT1804	11.6763	12.6826	11.1778	12.7833	0.983703	-0.0237047	3.48628	0.00617761	0.937353	0.974514
MT1808	7.55185	4.43546	9.42858	4.87912	1.19167	0.252982	2.48147	0.46966	0.493143	0.74623
MT1809	134.423	140.964	143.69	94.2159	0.864013	-0.210876	6.79572	0.435378	0.509362	0.762581	Rv1760	Rv1760	conserved hypothetical protein
MT1810	7.8423	10.257	6.91145	10.051	0.937443	-0.0931972	3.29479	0.0685337	0.793484	0.913094	Rv1761c	Rv1761c	hypothetical protein
MT1811	106.016	132.371	79.567	99.2414	0.750111	-0.414824	6.67117	1.7067	0.191414	0.473027	Rv1762c	Rv1762c	hypothetical protein
MT1812	20.1576	28.0681	25.5979	28.738	1.12743	0.173039	4.52518	0.31211	0.576388	0.802439
MT1813	26.9543	37.6321	53.3717	54.1583	1.66578	0.736198	5.27215	5.56682	0.0183039	0.123784
MT1814	181.419	138.608	128.928	146.52	0.860627	-0.216539	7.31636	0.353968	0.551875	0.789794	Rv1765c	Rv1765c	conserved hypothetical protein
MT1816	48.6804	48.0277	60.0272	70.6009	1.35055	0.433547	5.76687	2.19823	0.138169	0.402977	Rv1766	Rv1766	conserved hypothetical protein
MT1817	31.4854	27.8602	57.2114	48.4497	1.77999	0.831866	5.26068	8.25035	0.00407442	0.0486735
MT1820	238.29	183.586	154.185	138.518	0.693791	-0.527426	7.43828	2.55139	0.110197	0.35776	Rv1769	Rv1769	hypothetical protein
MT1820.1	233.12	213.387	152.265	165.11	0.710776	-0.492534	7.69293	2.33114	0.126809	0.387198	Rv1770	Rv1770	conserved hypothetical protein
MT1821	205.526	239.238	156.19	185.065	0.767285	-0.382165	7.64039	1.35073	0.245151	0.52959	Rv1771	Rv1771	oxidoreductase, possible
MT1821.1	17.834	22.8703	18.2172	8.9288	0.668188	-0.581674	4.17146	2.57518	0.108552	0.354437
MT1822	10.6307	14.4152	12.543	6.53803	0.764169	-0.388036	3.48868	1.24255	0.26498	0.550271
MT1823	119.319	100.283	55.5902	37.1789	0.42255	-1.2428	6.45948	15.0835	0.000102857	0.00375981	Rv1773c	Rv1773c	transcriptional regulator (IclR family)
MT1824	86.2653	82.4025	50.7266	69.7227	0.713981	-0.486043	6.3766	2.67357	0.102027	0.340374	Rv1774	Rv1774	putative oxidoreductase with FAD-binding site
MT1825	112.116	110.401	78.543	102.315	0.812712	-0.299184	6.78187	0.891707	0.345015	0.628302	Rv1775	Rv1775	conserved hypothetical protein
MT1826	13.6514	9.28674	9.00195	8.09935	0.744962	-0.424761	3.33379	1.12506	0.288833	0.575358	Rv1776c	Rv1776c	putative transcriptional regulator
MT1827	12.2572	9.84117	15.9134	11.7099	1.24938	0.321207	3.6635	1.01907	0.31274	0.59705	Rv1777	Rv1777	probable cytochrome p450
MT1828	124.315	197.724	271.424	218.048	1.52014	0.604202	7.57271	3.02456	0.0820123	0.306108	Rv1778c	Rv1778c	hypothetical protein
MT1829	448.812	455.466	326.374	299.578	0.692222	-0.530693	8.81526	2.41456	0.120212	0.376847	Rv1779c	Rv1779c	possible integral membrane protein
MT1830	121.178	168.825	170.098	139.592	1.06807	0.0949997	7.15114	0.0886692	0.765876	0.90081	Rv1780	Rv1780	conserved hypothetical protein
MT1831	46.4148	48.3742	50.4706	46.4005	1.0221	0.0315351	5.75572	0.0125305	0.910871	0.959269	Rv1781c	Rv1781c	probable 4-[alpha]-glucanotransferase
MT1832	777.782	837.123	1316.5	960.309	1.40988	0.495576	9.80038	1.71049	0.190922	0.472431
MT1833	1811.57	1907.45	2988.6	2277.33	1.41595	0.501767	11.0235	1.39698	0.237231	0.522956	Rv1783	Rv1783	conserved hypothetical protein
MT1834	41.5933	42.7606	41.2127	42.5948	0.99354	-0.00935041	5.5375	0.00110644	0.973465	0.988705	Rv1785c	Rv1785c	Probable member of the cytochrome P450
MT1835	34.3319	34.4441	42.6206	42.9851	1.24466	0.315749	5.25018	1.19748	0.273827	0.558287	Rv1786	Rv1786	Probable ferredoxin
MT1836	74.1243	78.7294	37.0744	30.3969	0.44155	-1.17935	6.00944	12.4465	0.000418776	0.0106032	Rv1787	PPE	PPE-family protein
MT1837	6.21575	8.5937	5.07693	5.80616	0.736163	-0.441902	2.84086	1.62354	0.202599	0.484055	Rv1788	PE	PE-family protein
MT1838	311.02	315.264	178.887	245.761	0.678023	-0.560593	8.23787	2.8374	0.092093	0.326966	Rv1789	PPE	PPE-family protein
MT1838.1	3.89211	6.7918	6.31416	9.66067	1.49902	0.584016	2.7948	2.5263	0.111963	0.361141
MT1839	39.6182	44.7011	22.2702	18.7846	0.48718	-1.03747	5.30242	10.4439	0.00123053	0.0212044	Rv1790	PPE	PPE-family protein
MT1840	469.202	684.793	227.822	250.885	0.414839	-1.26938	8.90594	10.9276	0.000947429	0.018262	Rv1791	PE	PE-family protein
MT1842	346.804	466.139	233.24	277.866	0.628726	-0.669497	8.62332	3.31725	0.0685566	0.274089	Rv2346c	Rv2346c	conserved hypothetical protein
MT1843	407.858	641.478	352.953	480.594	0.794372	-0.332113	9.0627	0.716255	0.397375	0.674581
MT1844	418.779	406.884	276.159	340.221	0.746515	-0.421757	8.65338	1.55644	0.212187	0.493373	Rv1795	Rv1795	probable membrane protein
MT1845	649.807	585.273	548.991	534.118	0.876949	-0.189435	9.2864	0.294442	0.587388	0.80799	Rv1796	Rv1796	conserved hypothetical protein
MT1846	629.069	527.126	407.562	383.402	0.684106	-0.547709	9.00253	2.29223	0.130023	0.391661	Rv1797	Rv1797	conserved hypothetical protein
MT1847	296.265	221.634	251.457	222.049	0.914247	-0.129345	8.07247	0.144129	0.70421	0.872375	Rv1798	Rv1798	conserved hypothetical protein
MT1848	41.1866	39.8498	14.5482	18.4919	0.407611	-1.29474	4.63583	15.7122	7.37464e-05	0.00303348	Rv1799	lppT	probable lipoprotein
MT1849	99.452	96.7484	110.967	83.8721	0.993142	-0.0099284	6.40157	0.00104977	0.974153	0.988705	Rv1800	PPE	PPE-family protein
MT1850	19.4024	16.8409	32.1681	40.6431	2.00729	1.00525	4.43621	10.0537	0.00152041	0.0249648	Rv1801	PPE	PPE-family protein
MT1851	10.5726	12.7519	22.1849	22.5416	1.91897	0.940333	3.82339	9.8049	0.00174047	0.0277965	Rv1802	PPE	PPE-family protein
MT1853	31.3692	33.4045	27.4325	33.1293	0.934895	-0.0971232	4.94819	0.105088	0.745807	0.889617	Rv1803c	PE_PGRS	PE_PGRS-family protein
MT1854	14.4647	13.445	25.1713	14.247	1.41261	0.498362	4.14803	1.26423	0.260853	0.546064	Rv1804c	Rv1804c	conserved hypothetical protein
MT1855	15.5684	31.2561	9.38591	41.1798	1.0799	0.110903	4.53339	0.0419186	0.837775	0.927864	Rv1806	PE	PE-family protein
MT1856	20.7385	47.1267	18.0039	70.3082	1.30142	0.380082	5.41948	0.431387	0.511309	0.762581	Rv1807	PPE	PPE-family protein
MT1856.1	20.3319	31.8799	26.4939	53.8167	1.53849	0.62152	5.05882	2.58522	0.107865	0.352773	Rv1808	PPE	PPE-family protein
MT1857	107.875	127.727	125.558	252.153	1.60311	0.68087	7.41655	3.08308	0.0791108	0.299764	Rv1809	PPE	PPE-family protein
MT1858	554.48	583.54	602.192	658.389	1.1077	0.147562	9.41167	0.156797	0.692122	0.866388
MT1859	40.4314	56.5521	52.1772	49.8159	1.05216	0.0733501	5.78169	0.0611208	0.804733	0.917387	Rv1811	mgtC	probable magnesium transport ATPase protein C
MT1860	332.107	260.722	269.034	202.142	0.794793	-0.331349	7.78993	0.756969	0.384279	0.66318	Rv1812c	Rv1812c	probable dehydrogenase
MT1861	10178	11000.6	4949.7	2572.81	0.355196	-1.49331	12.1361	6.83198	0.00895399	0.0812915	Rv1813c	Rv1813c	conserved hypothetical protein
MT1862	123.85	146.301	163.187	135.493	1.10573	0.144995	6.93665	0.217554	0.64091	0.840928	Rv1814	Rv1814	possible C-5 sterol desaturase
MT1863	216.854	304.522	256.918	399.893	1.25979	0.333181	7.74558	0.796191	0.372235	0.651982	Rv1815	Rv1815	conserved hypothetical protein
MT1864	58.672	68.4031	69.8397	99.8757	1.33553	0.41741	5.94592	1.74059	0.187064	0.467641	Rv1816	Rv1816	putative transcriptional regulator
MT1865	108.224	76.0265	95.8643	51.9627	0.802342	-0.317711	6.29702	0.449516	0.502565	0.754415	Rv1817	Rv1817	flavoprotein
MT1866	163.468	125.648	134.347	138.274	0.942844	-0.0849085	7.1631	0.0698691	0.791527	0.913037	Rv1818c	PE_PGRS	PE_PGRS-family protein
MT1867	100.672	148.657	160.67	184.041	1.38268	0.467471	7.28303	1.53376	0.215548	0.496952	Rv1819c	Rv1819c	probable multidrug resistance pump
MT1868	269.833	172.359	127.264	129.736	0.581152	-0.783012	7.7419	4.75607	0.0291952	0.162139	Rv1820	ilvG	acetolactate synthase II
MT1869	1000.21	892.775	864.656	1019.05	0.99509	-0.00710113	9.93133	0.000360995	0.984841	0.991415	Rv1821	secA2	SecA, preprotein translocase subunit
MT1870	66.8048	67.5021	62.075	64.1117	0.939537	-0.0899779	6.06389	0.0968319	0.755665	0.895221	Rv1822	pgsA2	CDP-diacylglycerol-glycerol-3-phosphate
MT1871	74.0081	75.1949	73.9354	80.7007	1.03638	0.0515555	6.25184	0.0320101	0.858005	0.933761	Rv1823	Rv1823	conserved hypothetical protein
MT1872	19.4024	20.0982	19.1131	22.8831	1.06296	0.0880884	4.3619	0.0838435	0.772155	0.902412	Rv1824	Rv1824	small basic protein similar SBP_BACSU
MT1873	110.664	113.381	111.82	109.244	0.986714	-0.0192954	6.72742	0.00376908	0.951046	0.979521	Rv1825	Rv1825	hypothetical protein
MT1874	111.303	153.37	137.418	153.741	1.10018	0.137744	7.06471	0.169428	0.68062	0.860753	Rv1826	gcvH	glycine cleavage system H protein
MT1875	818.214	850.915	624.59	702.399	0.795019	-0.330939	9.63399	0.839192	0.359628	0.642737	Rv1827	Rv1827	conserved hypothetical protein
MT1876	303.875	309.789	236.696	254.154	0.799867	-0.322169	8.2294	0.973848	0.323722	0.607716	Rv1828	Rv1828	conserved hypothetical protein
MT1877	397.111	461.01	552.489	407.212	1.11841	0.161449	8.69055	0.215554	0.642449	0.841258	Rv1829	Rv1829	conserved hypothetical protein
MT1879	335.302	416.864	308.242	397.893	0.938811	-0.091093	8.63761	0.0702523	0.79097	0.913037	Rv1830	Rv1830	conserved hypothetical protein
MT1880	1104.6	1215.18	1124.09	742.31	0.804571	-0.313709	9.93092	0.660263	0.416467	0.691491	Rv1832	gcvB	glycine decarboxylase
MT1881	61.809	64.0369	48.4228	64.4532	0.896818	-0.157113	5.86303	0.280875	0.596128	0.813737	Rv1833c	Rv1833c	similar to 1,3,4,6-tetrachloro-1,4-cyclohexadien
MT1882	140.116	62.8588	30.9735	28.0062	0.290573	-1.78303	5.86522	14.707	0.000125581	0.00427012	Rv1834	Rv1834	conserved hypothetical protein
MT1884	752.745	698.1	532.011	575.346	0.763245	-0.389781	9.28445	1.24762	0.264007	0.549675	Rv1836c	Rv1836c	conserved hypothetical protein
MT1885	1690.28	1697.05	1239.96	1268.43	0.740523	-0.433383	10.4369	1.19604	0.274114	0.558389	Rv1837c	glcB	malate synthase
MT1886	31.3692	32.8501	30.7602	37.4717	1.06235	0.0872532	5.20428	0.0872874	0.767654	0.90081	Rv1838c	Rv1838c	conserved hypothetical protein
MT1887	26.1991	34.4441	31.2722	39.033	1.15963	0.213668	5.17296	0.422	0.515941	0.763395	Rv1839c	Rv1839c	conserved hypothetical protein
MT1888	12.1991	10.6035	11.3911	9.75825	0.927286	-0.108914	3.69302	0.13659	0.711695	0.876332	Rv1840c	PE_PGRS	PE_PGRS-family protein
MT1889	92.7715	67.2249	86.9477	68.2102	0.969645	-0.044472	6.23102	0.0177718	0.893948	0.95116	Rv1841c	Rv1841c	possible membrane protein
MT1890	111.767	77.5512	91.8113	74.9433	0.880692	-0.18329	6.47841	0.343836	0.557623	0.79337	Rv1842c	Rv1842c	possible membrane protein
MT1891	456.887	313.116	361.059	274.987	0.826016	-0.275758	8.4415	0.567413	0.451289	0.719106	Rv1843c	guaB1	inosine-5'-monophosphate dehydrogenase
MT1892	516.546	349.777	366.435	253.666	0.71578	-0.482412	8.53169	1.69058	0.193524	0.475497
MT1893	237.418	83.7193	121.42	75.0409	0.611739	-0.709012	7.45859	1.67893	0.195066	0.47692	Rv1845c	Rv1845c	hypothetical protein
MT1894	567.144	290.315	348.26	264.936	0.715115	-0.483754	8.77218	1.21986	0.269388	0.553684	Rv1846c	Rv1846c	putative transcriptional regulator
MT1895	78.1907	106.867	80.0789	88.2634	0.909816	-0.136354	6.54124	0.1729	0.677547	0.858648	Rv1847	Rv1847	conserved hypothetical protein
MT1896	23.8174	21.3456	19.4971	19.7117	0.867885	-0.204424	4.42321	0.503291	0.478058	0.737607
MT1897	6.27384	6.9304	5.67421	7.8066	1.02019	0.0288374	2.89214	0.0086572	0.925869	0.968392	Rv1849	ureB	urease [beta] subunit
MT1898	89.1699	79.0759	76.5805	75.48	0.903723	-0.146047	6.33515	0.258325	0.611273	0.825994	Rv1850	ureC	urease [alpha] subunit
MT1899	7.60994	4.78198	6.48481	6.24528	1.02354	0.0335625	2.98403	0.0103991	0.918776	0.963929	Rv1851	ureF	urease accessory protein
MT1900	9.87549	11.6431	16.34	20.4923	1.71201	0.775687	3.88519	5.79748	0.0160491	0.114049	Rv1852	ureG	urease accessory protein
MT1901	34.2157	21.6922	46.247	46.4493	1.65628	0.727947	5.15844	5.46887	0.0193581	0.127372
MT1902	3374.17	2399.24	2157.27	1151.62	0.573128	-0.803071	11.4384	2.05932	0.151278	0.422742	Rv1854c	ndh	probable NADH dehydrogenase
MT1903	360.514	325.521	286.697	243.859	0.773371	-0.370767	8.40856	1.20782	0.271764	0.556356	Rv1855c	Rv1855c	probable monooxygenase
MT1904	236.779	355.391	162.078	225.22	0.654049	-0.612529	8.90288	2.45164	0.117402	0.37148	Rv1856c	Rv1856c	short-chain dehydrogenase/reductase family
MT1905	56.5808	76.0958	63.7389	68.2102	0.994748	-0.00759693	6.87344	0.000595553	0.98053	0.989959	Rv1857	modA	molybdate binding protein
MT1906	4.82156	3.81172	5.33291	5.51341	1.25242	0.324714	2.9748	0.944375	0.331155	0.61741	Rv1858	modB	transport system permease, molybdate uptake
MT1907	93.5848	86.2835	93.8165	76.2607	0.945595	-0.0807061	6.60912	0.0718816	0.788617	0.912052	Rv1859	modC	molybdate uptake ABC-transporter
MT1908	137.211	134.727	143.221	145.056	1.06007	0.0841566	7.20805	0.0713256	0.789416	0.912442	Rv1860	modD	precursor of Apa (45/47 kD secreted protein)
MT1909	6.5643	9.28674	6.57014	8.48968	0.951323	-0.0719926	2.95449	0.0471862	0.828034	0.923601
MT1910	43.6845	67.2942	33.064	46.2541	0.71485	-0.484288	5.67278	1.87545	0.170852	0.449375	Rv1861	Rv1861	hypothetical protein
MT1911	160.564	88.5012	104.653	101.925	0.829262	-0.270101	6.93653	0.534215	0.46484	0.729914	Rv1862	adhA	alcohol dehydrogenase (Zn)
MT1912	358.364	350.678	407.861	390.769	1.12635	0.171651	8.49038	0.25826	0.611318	0.825994	Rv1863c	Rv1863c	probable membrane protein
MT1913	38.9791	45.1862	57.9794	65.0387	1.46181	0.54776	5.56404	3.715	0.0539256	0.23987	Rv1864c	Rv1864c	conserved hypothetical protein
MT1914	36.7136	56.9679	43.1325	45.0343	0.941624	-0.0867775	5.43515	0.0761984	0.782517	0.909008	Rv1865c	Rv1865c	Short-chain alcohol dehydrogenase
MT1915	77.8421	94.1149	95.395	111.488	1.2032	0.266876	6.43314	0.779294	0.377357	0.656904	Rv1866	Rv1866	conserved hypothetical protein
MT1916	16.8464	8.73231	16.34	11.0268	1.06901	0.09627	3.70099	0.0384323	0.844578	0.929618
MT1917	154	120.728	70.3517	75.724	0.531666	-0.911409	6.8144	7.65673	0.00565611	0.0604578	Rv1868	Rv1868	conserved hypothetical protein
MT1918	464.497	410.211	243.053	207.997	0.515667	-0.955489	8.23972	7.124	0.00760587	0.0733029	Rv1869c	Rv1869c	probable reductase (like rhodocoxin reductase)
MT1919	78.1907	76.7196	89.6355	83.2866	1.11628	0.158701	6.37224	0.308623	0.578526	0.803733	Rv1870c	Rv1870c	hypothetical protein
MT1920	781.035	735.662	594.811	702.204	0.85515	-0.225751	9.56323	0.380844	0.537152	0.779642	Rv1871c	Rv1871c	hypothetical protein
MT1921	2251.96	2230.07	1981.32	1910.23	0.868257	-0.203805	11.1364	0.23088	0.630872	0.836273	Rv1872c	lldD2	L-lactate dehydrogenase
MT1922	21.029	17.3953	24.1474	14.8813	1.01592	0.0227914	4.21759	0.00474931	0.945057	0.976928	Rv1873	Rv1873	hypothetical protein
MT1923	42.8132	31.5333	22.9528	24.0541	0.63199	-0.662026	5.03108	4.31415	0.0377967	0.189936
MT1924	46.7053	45.6021	37.2877	39.2769	0.829398	-0.269863	5.56489	0.93105	0.33459	0.618635	Rv1875	Rv1875	conserved hypothetical protein
MT1924.1	158.298	260.93	273.813	463.858	1.75962	0.815264	8.39519	1.97124	0.160317	0.434957
MT1925	203.377	396.003	463.75	439.902	1.50775	0.592396	8.37852	2.09565	0.147718	0.417757	Rv1876	bfrA	bacterioferritin
MT1926	330.771	395.657	372.066	296.992	0.921066	-0.118624	8.29691	0.118973	0.730151	0.881261
MT1927	37.8754	33.3352	35.7945	38.1547	1.03812	0.0539716	5.21888	0.035417	0.850724	0.93202	Rv1878	glnA3	probable glutamine synthase
MT1928	14.9875	15.3162	16.6813	18.0528	1.14605	0.196673	4.11459	0.448437	0.503078	0.754883	Rv1879	Rv1879	conserved hypothetical protein
MT1929	696.164	613.41	516.439	453.856	0.740925	-0.432601	9.12855	1.36681	0.242361	0.52654	Rv1880c	Rv1880c	Similar to 6-deoxyerythronolide beta hydroxylase
MT1930	97.0703	82.056	110.199	103.193	1.19117	0.252378	6.66122	0.691167	0.405768	0.683388
MT1931	112	80.3234	78.1164	86.2629	0.854559	-0.226749	6.47801	0.390632	0.531968	0.776389	Rv1882c	Rv1882c	probable dehydrogenase
MT1931.1	320.895	317.967	316.732	485.18	1.25518	0.327897	8.25354	0.766096	0.381428	0.660259	Rv1883c	Rv1883c	conserved hypothetical protein
MT1932	844.761	1077.82	1150.29	1926.96	1.60058	0.678599	9.95594	2.41403	0.120253	0.376847
MT1933	86.1491	127.034	81.6575	98.8023	0.846628	-0.2402	6.71573	0.56905	0.450636	0.718666	Rv1885c	Rv1885c	hypothetical protein
MT1934	455.899	753.127	460.166	468.445	0.768092	-0.380649	9.06097	1.00611	0.315836	0.601521	Rv1886c	fbpB	antigen 85B, mycolyltransferase
MT1935	385.144	585.827	428.766	470.787	0.926472	-0.110181	9.06109	0.0763963	0.782242	0.909008	Rv1887	Rv1887	hypothetical protein
MT1936	139.535	149.697	106.231	106.999	0.737256	-0.439763	6.94216	1.30539	0.253232	0.538154	Rv1888c	Rv1888c	hypothetical protein
MT1937	11.8506	13.6529	21.1183	22.9319	1.72785	0.788976	4.25067	6.95214	0.00837188	0.0778644	Rv1889c	Rv1889c	conserved hypothetical protein
MT1940	19.6929	22.6624	23.3795	22.3952	1.08127	0.112733	4.43521	0.151186	0.697405	0.869037
MT1941	415.119	434.813	313.831	331.488	0.759262	-0.397329	8.33526	1.33238	0.248383	0.532877	Rv1891	Rv1891	hypothetical protein
MT1942	81.4438	91.2041	73.2101	67.0392	0.812461	-0.299629	6.07153	0.993443	0.318902	0.603043
MT1943	109.56	172.013	82.2121	86.5069	0.599317	-0.738609	6.5733	5.28083	0.0215614	0.135694
MT1944	351.451	254.554	316.519	186.968	0.830834	-0.267369	8.1272	0.226215	0.634345	0.83871	Rv1894c	Rv1894c	some similarity to dioxygenases
MT1945	8.42321	7.96996	17.7906	9.85583	1.68702	0.754477	3.22675	3.6841	0.0549336	0.24273
MT1946	48.3318	61.6806	62.971	57.1833	1.09253	0.127672	5.8217	0.17012	0.680005	0.860248	Rv1895	Rv1895	similar to sorbitol and alcohol dehydrogenases
MT1947	60.3567	78.1749	66.896	73.9675	1.01703	0.024357	6.09374	0.00668005	0.93486	0.97366	Rv1896c	Rv1896c	conserved hypothetical protein
MT1948	21.6099	26.5434	23.5928	29.6163	1.10523	0.14434	4.63977	0.225663	0.634759	0.83871	Rv1897c	Rv1897c	conserved hypothetical protein
MT1949	219.12	88.4319	155.764	87.2875	0.790232	-0.339651	7.07216	0.442343	0.505994	0.75842	Rv1898	Rv1898	hypothetical protein
MT1950	752.803	691.308	705.522	618.283	0.916692	-0.12549	9.41752	0.117454	0.731812	0.881792	Rv1899c	lppD	lipoprotein
MT1951	225.336	180.398	176.199	141.397	0.782764	-0.353351	7.5736	1.02089	0.312307	0.59705	Rv1900c	lipJ	probable esterase
MT1952	234.63	228.981	229.272	203.899	0.934354	-0.0979592	7.71288	0.0917732	0.761935	0.899444	Rv1901	cinA	competence damage protein
MT1953	41.3028	41.9982	44.0711	39.2769	1.0007	0.00101323	5.3693	1.26675e-05	0.99716	0.998411
MT1954	48.9127	51.2157	40.0181	45.815	0.857197	-0.222301	5.66459	0.618442	0.431627	0.703222	Rv1903	Rv1903	unknown membrane protein
MT1955	301.319	304.037	282.687	264.156	0.903351	-0.146642	8.14946	0.194638	0.659084	0.849808	Rv1904	Rv1904	conserved hypothetical protein
MT1956	347.036	277.355	295.87	197.995	0.790963	-0.338317	8.04523	0.836909	0.360282	0.642737	Rv1905c	aao	D-amino acid oxidase
MT1957	406.464	360.727	295.784	218.634	0.670535	-0.576615	8.28769	2.33795	0.126255	0.38637	Rv1906c	Rv1906c	conserved hypothetical protein
MT1958	38.863	60.9182	41.426	39.9112	0.815618	-0.294034	5.35686	0.85296	0.355716	0.639328	Rv1907c	Rv1907c	hypothetical protein
MT1959	1177.97	1289.19	663.072	677.662	0.543434	-0.879822	9.87336	5.53388	0.0186517	0.125466	Rv1908c	katG	catalase-peroxidase
MT1960	122.688	73.8781	51.9212	40.4967	0.470161	-1.08877	6.27125	6.45683	0.0110526	0.091448
MT1961	107.527	83.9272	131.531	114.074	1.28268	0.359156	6.67368	1.30236	0.253783	0.538615	Rv1910c	Rv1910c	probable secreted protein
MT1962	164.456	178.181	246.722	210.339	1.334	0.415762	7.6415	1.66456	0.196989	0.478093	Rv1911c	lppC	lipoprotein
MT1963	158.24	174.577	124.193	143.397	0.804023	-0.314691	7.25997	1.04465	0.306743	0.593076	Rv1912c	fadB5	3-hydroxyacyl-CoA dehydrogenase
MT1964	45.1949	35.4837	42.2366	43.7657	1.06554	0.0915914	5.45382	0.0914889	0.762293	0.8996	Rv1913	Rv1913	hypothetical protein
MT1965	44.9625	68.611	65.4881	62.1112	1.12399	0.168631	5.733	0.284368	0.593852	0.812855	Rv1914c	Rv1914c	hypothetical protein
MT1966	1501.89	1423.23	1057.79	1192.6	0.769334	-0.378318	10.2827	0.90751	0.340776	0.623662	Rv1915	aceAa	isocitrate lyase, [alpha] module
MT1968	44.2074	45.3248	50.172	41.5701	1.02487	0.0354478	5.34695	0.0146614	0.903624	0.955849	Rv1917c	PPE	PPE-family protein
MT1969	245.609	334.669	243.095	231.856	0.818537	-0.288881	7.84369	0.663485	0.415332	0.691066	Rv1918c	PPE	PPE-family protein
MT1970	175.029	264.672	181.233	214.437	0.899921	-0.15213	7.61497	0.170532	0.679639	0.860057	Rv1919c	Rv1919c	weak similarity to pollen antigens
MT1971	92.2487	92.1744	86.4784	72.0159	0.859488	-0.21845	6.36708	0.55508	0.456249	0.722968	Rv1920	Rv1920	probableproable membrane protein
MT1972	27.5933	26.6821	34.7279	23.8589	1.07979	0.110756	4.76635	0.127235	0.721316	0.879381	Rv1921c	lppF	lipoprotein
MT1973	688.031	342.431	508.375	288.307	0.773124	-0.371229	8.75778	0.578772	0.446794	0.717298	Rv1922	Rv1922	probable penicillin binding protein
MT1974	564.181	365.232	231.32	174.624	0.436779	-1.19502	8.44537	8.7837	0.00303934	0.0412482	Rv1923	lipD	probable esterase
MT1975	48.1575	42.2062	51.0679	69.2836	1.33133	0.412869	5.95647	1.85467	0.173241	0.452969
MT1976	7662.63	4074.31	2955.07	2557.1	0.469643	-1.09036	12.2484	3.89867	0.0483244	0.225376	Rv1925	fadD31	acyl-CoA synthase
MT1977	208.838	216.367	165.917	154.473	0.753523	-0.408277	7.41101	1.71412	0.190452	0.47199	Rv1926c	Rv1926c	hypothetical protein
MT1979	83.477	66.6705	66.2134	58.1592	0.828249	-0.271863	5.99445	0.836748	0.360329	0.642737	Rv1927	Rv1927	hypothetical protein
MT1980.2	9.1784	5.61363	6.48481	8.05055	0.978544	-0.0312907	2.92989	0.00884557	0.925069	0.968011	Rv1930c	Rv1930c	conserved hypothetical protein
MT1981	23.1784	13.6529	20.1797	17.9552	1.03404	0.0482929	4.24007	0.0213228	0.883903	0.946023
MT1982	200.066	217.06	211.396	242.98	1.0893	0.123406	7.88315	0.142494	0.705814	0.873239	Rv1932	tpx	thiol peroxidase
MT1984	1.39419	3.04938	3.41306	3.46418	1.5655	0.646627	1.3591	2.95602	0.0855581	0.31319	Rv1934c	fadE17	acyl-CoA dehydrogenase
MT1985	4.5892	9.63326	8.27667	11.7587	1.41225	0.497992	2.93394	1.49899	0.220827	0.503774	Rv1935c	echA13	enoyl-CoA hydratase/isomerase superfamily
MT1986	42.4065	49.3445	72.6982	37.862	1.20547	0.2696	5.36485	0.539636	0.462584	0.727516	Rv1936	Rv1936	similar alkanal monooxygenase alpha chain
MT1987	63.6098	63.829	117.623	51.8163	1.32978	0.411193	5.9361	1.05334	0.304739	0.591396	Rv1937	Rv1937	similar to ring-hydroxylating dioxygenases
MT1988	25.5601	25.9197	46.4176	23.6638	1.36187	0.44559	4.64041	1.4398	0.230172	0.514208	Rv1938	ephB	probable epoxide hydrolase
MT1989	9.8174	9.63326	17.3213	6.87956	1.24523	0.31641	3.27575	0.429128	0.512417	0.762581	Rv1939	Rv1939	similar nitrilotriacetate monooxygenase component
MT1990	8.30703	8.45509	15.1455	6.73319	1.30686	0.386106	3.23893	0.875471	0.349445	0.633766	Rv1940	ribA	GTP cyclohydrolase II
MT1991	27.7095	20.7219	43.8578	28.3477	1.49037	0.575673	4.82049	2.82319	0.0929118	0.327892	Rv1941	Rv1941	short-chain alcohol dehydrogenase family
MT1992	38.1078	38.741	55.2062	51.8651	1.39331	0.47852	5.54849	2.70049	0.100317	0.339837	Rv1942c	Rv1942c	conserved hypothetical protein
MT1993	32.9958	34.4441	60.3685	47.8154	1.60443	0.682064	5.40337	5.29937	0.0213331	0.135119	Rv1943c	Rv1943c	conserved hypothetical protein
MT1994	34.3319	26.5434	55.5476	47.7666	1.69626	0.762356	5.32481	6.49723	0.0108043	0.0903753
MT1995	125.593	83.8579	119.03	87.7754	0.987298	-0.0184418	6.63422	0.00198508	0.964463	0.986467	Rv1148c	Rv1148c	REP-family protein
MT1997	1.51037	0.900952	2.26115	2.09802	1.78166	0.83322	0.948604	4.85317	0.0275954	0.157069	Rv1946c	lppG	lipoprotein
MT1998	38.3401	31.5333	66.0427	57.1345	1.7623	0.817459	5.52948	6.50535	0.0107551	0.0901527	Rv1947	Rv1947	hypothetical protein
MT1998.1	12.6639	18.2963	17.5346	13.7591	1.01273	0.0182561	3.85403	0.00349315	0.95287	0.979992	Rv1948c	Rv1948c	hypothetical protein
MT1999	12.6058	12.4054	29.6083	22.2488	2.07347	1.05205	3.96252	11.7524	0.000607648	0.0138415	Rv1949c	Rv1949c	conserved hypothetical protein
MT2000	7.95849	8.31648	8.78863	8.24572	1.04718	0.0665039	3.0719	0.042326	0.837	0.927705	Rv1950c	Rv1950c	conserved hypothetical protein
MT2001	15.5684	14.6925	28.0724	28.6405	1.87329	0.905577	4.17518	8.68333	0.00321134	0.0423218	Rv1951c	Rv1951c	conserved hypothetical protein
MT2002	59.4853	42.4141	34.2586	28.7868	0.618635	-0.69284	5.448	4.20047	0.0404127	0.198825	Rv1952	Rv1952	conserved hypothetical protein
MT2003	60.5891	40.6815	35.7945	19.4189	0.54536	-0.87472	5.16648	5.91536	0.0150094	0.110988
MT2004	85.5682	89.4022	95.2244	64.9411	0.915566	-0.127264	6.11802	0.170994	0.67923	0.860057	Rv1955	Rv1955	hypothetical protein
MT2005	36.4812	66.2547	63.6109	82.7499	1.42515	0.511112	5.64156	1.91356	0.166568	0.441501	Rv1956	Rv1956	putative transcriptional regulator
MT2006	60.6471	109.778	112.503	132.615	1.43854	0.524606	6.46166	1.61471	0.203831	0.484361	Rv1957	Rv1957	hypothetical protein
MT2007	28.6389	47.1267	61.7337	68.8444	1.72418	0.785907	5.41154	4.32358	0.0375877	0.189245
MT2008	19.8091	15.4548	26.4512	24.0541	1.43105	0.517071	4.51318	2.77944	0.0954818	0.332564	Rv1959c	Rv1959c	conserved hypothetical protein
MT2009	4.53111	4.43546	6.18617	7.70902	1.54693	0.629406	2.6904	3.77245	0.0521032	0.236609	Rv1960c	Rv1960c	hypothetical protein
MT2010	7.37757	6.23736	9.59923	11.1244	1.5188	0.602937	3.13314	3.70071	0.0543894	0.241308	Rv1961	Rv1961	hypothetical protein
MT2012	68.0247	64.8686	74.1061	74.3091	1.11673	0.15928	5.97569	0.311086	0.577015	0.80262	Rv1962c	Rv1962c	conserved hypothetical protein
MT2013	23.1784	30.5631	34.5572	40.7407	1.40163	0.487108	4.95289	2.28891	0.130301	0.391661
MT2014	87.1948	80.7392	79.2257	71.528	0.897693	-0.155706	6.1826	0.266911	0.605411	0.822189	Rv1963c	Rv1963c	putative transcriptional regulator
MT2015	18.8796	60.5717	40.6581	37.9596	0.990331	-0.0140169	5.20033	0.0010236	0.974477	0.988705
MT2015.1	6.33193	6.58388	19.3265	9.61187	2.24113	1.16423	3.27663	5.67569	0.0172016	0.119157
MT2016	31.7178	46.4337	40.6581	23.4686	0.821115	-0.284345	5.10047	0.487672	0.484967	0.741387	Rv1964	Rv1964	part of mce3 operon
MT2017	12.5477	18.7121	15.7427	11.4171	0.870528	-0.200038	3.85809	0.338628	0.560622	0.795478
MT2018	42.9874	49.6217	40.9994	22.6391	0.687512	-0.540544	5.12272	1.6554	0.198225	0.479344	Rv1966	mce3	cell invasion protein
MT2019	22.7136	18.5042	19.1131	8.3433	0.666568	-0.585176	4.10101	1.39422	0.237694	0.523094	Rv1967	Rv1967	part of mce3 operon
MT2020	30.4398	22.6624	24.958	11.2708	0.682504	-0.55109	4.47338	1.19139	0.275049	0.558496	Rv1968	Rv1968	part of mce3 operon
MT2021	26.8381	29.177	29.4376	14.4422	0.783922	-0.351219	4.48119	0.695687	0.404237	0.682278	Rv1969	Rv1969	part of mce3 operon
MT2022	27.1286	28.7612	30.2909	12.8321	0.772094	-0.373151	4.52233	0.64338	0.422489	0.696584	Rv1970	lprM	part of mce3 operon
MT2023	31.3692	37.9786	37.2877	20.0044	0.826655	-0.274642	4.84198	0.430834	0.51158	0.762581	Rv1971	Rv1971	part of mce3 operon
MT2024	5.51866	6.8611	7.46607	7.41627	1.2044	0.26832	2.7566	0.738906	0.390012	0.669422	Rv1972	Rv1972	conserved hypothetical protein
MT2024.1	3.07883	4.15824	3.92502	3.70813	1.05981	0.0838044	1.88978	0.0680069	0.794261	0.913094
MT2025	5.34438	8.31648	8.02069	7.95297	1.17315	0.230392	2.68977	0.499273	0.47982	0.739182
MT2026	14.8713	30.2166	33.3627	29.4699	1.39541	0.480692	4.48873	1.73	0.188411	0.46902	Rv1975	Rv1975	hypothetical protein
MT2028	43.9169	22.7317	13.6096	13.4176	0.405361	-1.30272	4.76636	9.93391	0.00162261	0.026318	Rv1976c	Rv1976c	hypothetical protein
MT2029	112.348	93.4911	91.7686	81.6765	0.842578	-0.247118	6.53757	0.661677	0.415968	0.691491	Rv1977	Rv1977	probable zinc metallopeptidase
MT2030	178.63	186.012	138.912	149.74	0.791607	-0.337144	7.27463	1.18913	0.275506	0.558855	Rv1978	Rv1978	similar to methyltransferases
MT2031	75.5766	164.32	147.913	204.24	1.46817	0.554017	7.37109	1.73973	0.187174	0.467641	Rv1979c	Rv1979c	unknown permease
MT2032	1121.39	2386.83	2112	2148.62	1.21448	0.280335	11.0495	0.282464	0.595091	0.813291	Rv1980c	mpt64	secreted immunogenic protein Mpb64/Mpt64
MT2033	848.537	1088.07	1215.13	1160.35	1.22663	0.294703	10.1707	0.554168	0.45662	0.723268	Rv1981c	nrdF	ribonucleotide reductase small subunit
MT2034	1089.96	887.161	722.715	446.391	0.591323	-0.757982	9.52086	2.75081	0.097205	0.334929	Rv1982c	Rv1982c	conserved hypothetical protein
MT2035	728.23	575.57	491.779	263.814	0.579545	-0.787007	8.85002	3.33013	0.0680214	0.273043
MT2036	86.9624	92.9367	90.1048	76.2119	0.924622	-0.113065	6.29086	0.150813	0.697759	0.869037	Rv1983	PE_PGRS	PE_PGRS-family protein
MT2037	207.153	214.011	227.395	208.339	1.03461	0.0490932	7.6602	0.0225555	0.880619	0.944718	Rv1984c	Rv1984c	probable secreted protein
MT2038	58.0911	42.2755	107.597	63.575	1.7052	0.769944	6.14669	3.49284	0.0616347	0.259091
MT2039	59.5434	35.7609	60.7098	35.4712	1.00904	0.0129852	5.61892	0.00100687	0.974686	0.988705	Rv1985c	Rv1985c	transcriptional regulator (LysR family)
MT2040	22.8298	20.0982	65.5734	50.4501	2.70174	1.43389	5.19268	19.783	8.67516e-06	0.000586676	Rv1986	Rv1986	membrane protein, LYSE/YGGA family
[truncated: 1,992 more rows]

## Sheet: 3B, WT DMSO vs HC106A
Supplementary Dataset 3B: Gene expression tables of WT Mtb treated with HC106A compared to DMSO
	DMSO_1	DMSO_2	HC106A_1	HC106A_2	Fold Change	logFC	logCPM	LR	PValue	FDR	Rv number	Gene name	Annotated function
MT0001	383.343	774.403	588.336	1140.34	1.49321	0.578418	9.20386	1.60565	0.205104	0.772521	Rv0001	dnaA	chromosomal replication initiator protein
MT0002	172.182	286.018	207.252	299.436	1.10598	0.14532	7.75533	0.142175	0.706128	0.969196	Rv0002	dnaN	DNA polymerase III, [beta] subunit
MT0003	92.5973	144.499	96.7142	140.026	0.998835	-0.00168141	6.80303	2.4195e-05	0.996075	0.998284	Rv0003	recF	DNA replication and SOS induction
MT0004	26.141	28.6919	32.3056	37.7841	1.27885	0.354845	5.03614	1.43381	0.231144	0.792407	Rv0004	Rv0004	conserved hypothetical protein
MT0005	986.271	1669.12	1059.4	1458.61	0.948281	-0.0766129	10.4347	0.031103	0.860011	0.985247	Rv0005	gyrB	DNA gyrase subunit B
MT0006	589.276	833.034	539.27	851.855	0.978114	-0.0319255	9.67769	0.00632841	0.936594	0.991666	Rv0006	gyrA	DNA gyrase subunit A
MT0007	178.282	205.625	182.795	225.719	1.06419	0.0897575	7.85002	0.0702842	0.790923	0.983793
MT0009	4.00829	4.92059	4.75975	7.60409	1.38942	0.474483	2.38577	1.20515	0.272296	0.814846
MT0010	50.4812	40.6815	44.6607	49.0917	1.02824	0.0401719	5.67292	0.0169101	0.896536	0.987206	Rv0008c	Rv0008c	hypothetical protein
MT0011	1473.13	2040.52	1705.16	2766.94	1.27279	0.347997	10.7148	0.624019	0.429558	0.905045	Rv0009	ppiA	peptidyl-prolyl cis-trans isomerase
MT0012	8.5394	9.49465	13.5197	12.923	1.46669	0.552568	3.61638	3.45153	0.0631933	0.465205
MT0013	70.4645	98.8969	95.8533	84.7482	1.06654	0.0929337	6.39629	0.0933462	0.759965	0.977571	Rv0010c	Rv0010c	hypothetical protein
MT0014	199.369	341.184	277.484	291.792	1.05323	0.0748271	8.0736	0.0427436	0.836209	0.983793	Rv0011c	Rv0011c	hypothetical protein
MT0015	141.8	135.628	136.007	128.757	0.954313	-0.0674663	7.13261	0.0476841	0.827143	0.983793	Rv0012	Rv0012	possible cell division protein
MT0016	104.041	128.005	130.589	156.77	1.23858	0.308684	7.00739	0.925252	0.3361	0.863514	Rv0013	pabA	p-aminobenzoate synthase glutamine amidotransferase
MT0017	485.584	453.11	478.406	524.367	1.06827	0.0952702	8.79809	0.0778606	0.780218	0.983793	Rv0014c	pknB	serine-threonine protein kinase
MT0018	427.376	353.936	336.474	313.304	0.831629	-0.265989	8.40342	0.501838	0.478694	0.909913	Rv0015c	pknA	serine-threonine protein kinase
MT0019	618.438	549.373	559.474	569.992	0.967157	-0.0481779	9.04202	0.0180765	0.893048	0.987206	Rv0016c	pbpA	penicillin-binding protein
MT0020	194.78	196.061	247.811	227.295	1.21557	0.281635	7.60431	0.746352	0.387634	0.886039	Rv0017c	rodA	FtsW/RodA/SpovE family
MT0021	341.808	310.136	350.044	325.754	1.03656	0.0518057	8.33013	0.0248673	0.874698	0.987206	Rv0018c	ppp	putative phosphoprotein phosphatase
MT0022	171.02	196.685	200.568	210.629	1.11834	0.161361	7.47587	0.261731	0.608934	0.953842	Rv0019c	Rv0019c	conserved hypothetical protein
MT0023	2962.3	2688.03	2709.72	2259.52	0.879457	-0.185315	11.1477	0.188386	0.664264	0.96772	Rv0020c	Rv0020c	conserved hypothetical protein
MT0024	24.6887	29.177	30.4827	33.6077	1.19045	0.251504	4.98357	0.665641	0.414576	0.899192	Rv0021c	Rv0021c	conserved hypothetical protein
MT0026	73.311	46.6416	72.1558	43.1818	0.960774	-0.0577315	5.92693	0.027858	0.867443	0.987193	Rv0023	Rv0023	putative transcriptional regulator
MT0027	90.4479	56.5521	105.423	52.3224	1.07252	0.101	6.24454	0.06357	0.80094	0.983793	Rv0024	Rv0024	putative p60 homologue
MT0028	25.5601	19.821	30.9384	21.6697	1.15765	0.211198	4.66628	0.418565	0.517654	0.922895	Rv0025	Rv0025	conserved hypothetical protein
MT0029	67.2114	77.8977	56.1043	58.9415	0.793004	-0.3346	6.09196	1.36913	0.241961	0.796009	Rv0026	Rv0026	conserved hypothetical protein
MT0030	64.7716	73.1158	80.1056	77.1047	1.14023	0.189319	6.22667	0.43651	0.508812	0.922431	Rv0027	Rv0027	conserved hypothetical protein
MT0030.1	27.0124	40.8894	36.8628	38.9266	1.11709	0.159747	5.23463	0.277419	0.598398	0.949814
MT0031	39.9086	25.0188	26.2799	14.2232	0.62268	-0.683438	4.59254	3.54877	0.0595897	0.453438
MT0033	2.09128	2.07912	1.97479	2.79736	1.15207	0.204231	1.84067	0.332682	0.564084	0.94124
MT0034	40.4895	41.721	38.4325	42.9848	0.990601	-0.0136239	5.49147	0.0022926	0.961811	0.993521	Rv0030	Rv0030	hypothetical protein
MT0035	11.3859	12.4054	12.8108	11.741	1.03194	0.0453564	3.74098	0.0238191	0.877346	0.987206	Rv0031	Rv0031	conserved hypothetical protein
MT0036	19.2282	11.0886	15.2413	9.81046	0.824197	-0.278938	3.69439	0.508903	0.475614	0.909913
MT0037	114.265	132.301	63.5478	86.7575	0.609818	-0.713549	6.39668	5.49956	0.0190213	0.235699	Rv0032	bioF2	C-terminal similar to B. subtilis BioF
MT0038	16.2074	19.1972	7.64599	14.6172	0.630826	-0.664687	3.68383	3.42515	0.0642103	0.468371	Rv0033	Rv0033	possible acyl carrier protein
MT0039	4.06638	4.78198	4.4053	4.05814	0.957425	-0.062768	1.96773	0.0410538	0.839434	0.983793	Rv0034	Rv0034	hypothetical protein
MT0040	55.5932	56.5521	37.3185	47.9885	0.761035	-0.393964	5.45924	1.84108	0.174824	0.742576	Rv0035	fadD34	acyl-CoA synthase
MT0041	108.805	101.184	128.361	112.328	1.14607	0.196701	6.8937	0.380516	0.537327	0.931102	Rv0036c	Rv0036c	conserved hypothetical protein
MT0042	119.668	126.272	130.792	136.401	1.08646	0.119638	6.9928	0.151329	0.697269	0.96772	Rv0037c	Rv0037c	probable membrane protein
MT0043	290.223	200.497	260.014	157.401	0.850491	-0.233632	7.73766	0.371138	0.542385	0.931102	Rv0038	Rv0038	conserved hypothetical protein
MT0044	12.4896	11.9896	12.7096	15.2082	1.14076	0.189994	3.96442	0.202661	0.652581	0.96772
MT0046	244.157	335.154	246.089	391.197	1.10017	0.13772	7.99046	0.107376	0.743151	0.973668	Rv0040c	Rv0040c	conserved hypothetical protein
MT0047	428.48	485.613	386.452	467.08	0.93378	-0.0988454	8.85913	0.0812112	0.775663	0.983793	Rv0041	leuS	leucyl-tRNA synthase
MT0048	87.7176	115.183	106.841	103.699	1.0378	0.0535343	6.66614	0.0307097	0.86089	0.985247	Rv0042c	Rv0042c	conserved hypothetical protein
MT0049	82.0247	80.5313	77.7764	70.9584	0.914888	-0.128333	6.28773	0.198251	0.656137	0.96772	Rv0043c	Rv0043c	transcriptional regulator (GntR family)
MT0050	59.8339	67.71	76.308	79.9808	1.22557	0.293455	6.12695	1.04941	0.305642	0.846757	Rv0044c	Rv0044c	possible monooxygenase
MT0051	80.0496	154.34	136.007	346.479	2.05886	1.04185	7.42241	4.3307	0.0374309	0.352735	Rv0045c	Rv0045c	possible dihydrolipoamide acetyltransferase
MT0052	609.086	1275.89	1209.69	3238.28	2.35974	1.23863	10.3879	4.76113	0.0291094	0.312285	Rv0046c	Rv0046c	conserved hypothetical protein
MT0053	410.356	600.519	532.282	1167.41	1.68148	0.74973	9.24224	2.95357	0.0856881	0.547501	Rv0047c	Rv0047c	conserved hypothetical protein
MT0054	62.9127	57.5917	75.0421	62.6057	1.14193	0.191474	5.9732	0.42886	0.512549	0.922431	Rv0048c	Rv0048c	hypothetical protein
MT0055	214.879	225.931	311.46	285.094	1.3533	0.43648	7.86589	1.81395	0.178035	0.745394	Rv0049	Rv0049	hypothetical protein
MT0056	527.584	516.869	644.086	637.759	1.22728	0.295466	9.12955	0.720759	0.395895	0.889399	Rv0050	ponA	penicillin-bonding protein
MT0057	67.6181	73.1158	109.829	108.821	1.55371	0.635713	6.46835	4.86508	0.0274056	0.299584	Rv0051	Rv0051	probable membrane protein
MT0058	31.7178	37.147	33.774	41.4482	1.09306	0.128368	5.27336	0.194802	0.65895	0.96772
MT0059	199.311	356.361	190.795	246.601	0.787243	-0.345118	8.08401	0.730071	0.39286	0.889399	Rv0053	rpsF	30S ribosomal protein S6
MT0060	174.39	296.275	171.351	252.826	0.901356	-0.149831	7.89716	0.12992	0.718515	0.971822	Rv0054	ssb	single strand binding protein
MT0061	95.1533	200.566	127.602	179.543	1.03883	0.0549643	7.28493	0.01398	0.90588	0.988973	Rv0055	rpsR	30S ribosomal protein S18
MT0062	120.771	244.643	170.693	278.869	1.23047	0.299208	7.74315	0.419832	0.517021	0.922431	Rv0056	rplI	50S ribosomal protein L9
MT0063	64.365	123.569	85.0679	121.468	1.09937	0.136671	6.58753	0.111867	0.738029	0.973668
MT0064	479.368	503.979	537.852	730.899	1.29027	0.367671	9.01077	1.06644	0.301751	0.841361	Rv0058	dnaB	DNA helicase (contains intein)
MT0065	45.892	38.0479	47.4456	57.3656	1.24854	0.320246	5.42667	1.20343	0.272637	0.814846
MT0066	470.132	420.606	558.258	419.171	1.09728	0.13393	8.67737	0.151265	0.697329	0.96772	Rv0060	Rv0060	hypothetical protein
MT0066.1	139.767	322.61	234.19	202.277	0.944056	-0.0830552	7.85479	0.0424042	0.836851	0.983793
MT0066.2	9.46885	6.65319	7.34217	4.88553	0.754206	-0.406969	3.18171	1.51813	0.217903	0.788244
MT0067	122.514	156.696	129.729	148.851	0.997855	-0.00309825	7.43012	6.88645e-05	0.993379	0.998284	Rv0062	celA	cellulase/endoglucanase
MT0068	226.439	156.835	138.691	136.637	0.718291	-0.477359	7.45407	2.06397	0.150817	0.712934	Rv0063	Rv0063	probable oxidoreductase
MT0069	76.6222	43.7308	68.0544	24.3882	0.767596	-0.38158	5.84015	0.572874	0.449119	0.90677
MT0070	1360.2	1150.31	1037.78	546.706	0.631127	-0.663999	10.0062	1.97497	0.159922	0.7251	Rv0064	Rv0064	possible membrane protein
MT0071	127.626	84.4123	189.479	91.2097	1.32326	0.404097	6.87179	1.14931	0.283694	0.828486	Rv0065	Rv0065	conserved hypothetical protein
MT0072	462.58	548.056	529.295	489.183	1.00777	0.0111639	8.86465	0.00103281	0.974362	0.993521	Rv0066c	icd2	isocitrate dehydrogenase
MT0073	40.78	50.4533	73.2192	68.0428	1.54866	0.631024	5.50492	4.64792	0.0310911	0.3256	Rv0067c	Rv0067c	transcriptional regulator (TetR/AcrR family)
MT0074	15.5103	26.4048	49.2685	111.579	3.84128	1.94159	5.31666	21.4519	3.6282e-06	0.000166397	Rv0068	Rv0068	probable oxidoreductase
MT0075	58.1492	65.8388	35.4956	47.8703	0.6728	-0.571751	5.60586	3.5967	0.0578943	0.450217
MT0076	46.9376	55.5125	30.9384	34.7109	0.641113	-0.64135	5.39435	4.46826	0.0345301	0.339743	Rv0070c	glyA2	serine hydroxymethyltransferase
MT0077	40.8962	16.633	13.5704	7.64349	0.367813	-1.44296	4.36564	12.257	0.000463515	0.0141564	Rv0071	Rv0071	group II intron maturase
MT0078	60.0662	97.4415	75.4978	102.202	1.12878	0.174768	6.27946	0.293143	0.588214	0.947849	Rv0072	Rv0072	ABC-transporter transmembrane subunit
MT0079	77.2031	100.768	92.7139	118.71	1.18834	0.248945	6.4166	0.641442	0.423189	0.904405	Rv0073	Rv0073	ABC-transporter ATP-binding subunit
MT0080	49.9003	49.0673	54.1802	64.1423	1.19576	0.257922	5.68526	0.794916	0.372618	0.878511	Rv0074	Rv0074	conserved hypothetical protein
MT0081	67.1533	52.9483	57.9779	62.5663	1.00351	0.00506093	5.89638	0.000280417	0.98664	0.996631	Rv0075	Rv0075	probable aminotransferase
MT0082	59.0787	63.4825	107.348	82.266	1.54689	0.629368	6.8285	4.00124	0.0454667	0.391093
MT0083	39.502	37.9786	201.53	117.174	4.11204	2.03986	7.93971	29.5223	5.52779e-08	3.15084e-06	Rv0077c	Rv0077c	probable oxidoreductase
MT0084	53.4438	76.4423	38.5338	34.7503	0.564349	-0.825339	5.97814	6.97603	0.00826086	0.131843	Rv0078	Rv0078	transcriptional regulator (TetR/AcrR family)
MT0085	257.111	251.227	264.571	164.926	0.844823	-0.243279	7.78351	0.451904	0.501432	0.922059
MT0085.1	231.9	159.884	196.77	101.06	0.760001	-0.395926	7.44755	1.10473	0.293231	0.832566
MT0086	2358.04	1979.67	69.0671	79.8626	0.0343385	-4.86403	10.3158	91.5822	1.07053e-21	3.28569e-19	Rv0079	Rv0079	hypothetical protein
MT0087	457.351	296.067	13.0134	14.6566	0.0367518	-4.76604	8.17586	108.97	1.64769e-25	1.09571e-22	Rv0080	Rv0080	hypothetical protein
MT0088	43.336	54.0571	18.1782	15.287	0.343576	-1.5413	5.17018	23.7062	1.12221e-06	5.39472e-05	Rv0081	Rv0081	transcriptional regulator (ArsR family)
MT0089	118.971	85.3133	49.066	48.6977	0.478503	-1.0634	6.43369	11.2726	0.000786602	0.0217954	Rv0082	Rv0082	probable oxidoreductase subunit
MT0090	69.7674	45.1169	30.5333	26.1218	0.492824	-1.02086	5.81439	10.4006	0.00125977	0.0328529	Rv0083	Rv0083	probable oxidoreductase subunit
MT0091	108.572	64.9379	44.2049	44.088	0.508751	-0.974967	6.25964	7.85295	0.00507378	0.0954017	Rv0084	hycD	formate hydrogenlyase subunit 4
MT0092	29.0456	16.7716	13.3172	13.7898	0.591183	-0.758323	4.51975	4.44061	0.0350937	0.343196	Rv0085	hycP	putative formate hydrogen lyase hycP
MT0093	99.6263	67.2942	45.6227	46.7277	0.553179	-0.854181	6.20626	6.15594	0.0130971	0.182082	Rv0086	hycQ	probable formate hydrogenlyase subunit
MT0096	428.074	443.754	357.184	249.517	0.695864	-0.523123	8.66183	2.19719	0.138262	0.693048	Rv0088	Rv0088	hypothetical protein
MT0098	41.2447	43.8695	41.5719	35.8535	0.909528	-0.136811	5.61163	0.221545	0.637865	0.961226	Rv0089	Rv0089	possible bioC biotin synthesis gene
MT0099	9.70122	12.9599	12.4564	12.5684	1.10593	0.14526	3.80954	0.214639	0.643155	0.963585	Rv0090	Rv0090	hypothetical protein
MT0099.1	3.07883	4.22755	4.65848	5.04313	1.33379	0.415531	2.33501	1.48137	0.22356	0.792407
MT0100	90.6222	130.084	76.308	95.3072	0.777829	-0.362476	6.74337	1.2	0.273322	0.815077	Rv0091	Rv0091	conserved hypothetical protein
MT0101	219.178	159.746	239.557	159.686	1.05345	0.0751168	7.60213	0.0442364	0.833414	0.983793	Rv0092	ctpA	cation-transporting ATPase
MT0102	61.9251	38.9489	49.623	28.013	0.76884	-0.379246	5.47212	1.12174	0.289543	0.831386	Rv0093c	Rv0093c	hypothetical protein
MT0103	68.2571	45.1169	53.8764	26.9886	0.712522	-0.488994	5.99486	1.85526	0.173173	0.740553	Rv1588c	Rv1588c	REP-family protein
MT0105	32.8215	35.0678	21.9252	16.7842	0.569824	-0.811412	4.52082	7.31044	0.00685553	0.117903	Rv0096	PPE	PPE-family protein
MT0106	87.311	114.074	53.7245	63.9847	0.584734	-0.774148	6.06755	6.56161	0.0104202	0.156893	Rv0097	Rv0097	conserved hypothetical protein
MT0107	26.0829	31.7412	18.8871	19.3057	0.66093	-0.597431	4.45718	4.15277	0.0415665	0.375227	Rv0098	Rv0098	hypothetical protein
MT0108	52.6306	54.6116	46.838	42.315	0.831265	-0.26662	5.64165	0.720261	0.396058	0.889399	Rv0099	fadD10	acyl-CoA synthase
MT0109	9.93358	9.70256	5.77247	7.52529	0.678969	-0.558583	2.91739	3.31692	0.0685703	0.492965	Rv0100	Rv0100	hypothetical protein
MT0110	187.518	157.944	133.881	118.159	0.72951	-0.455	7.25959	1.75787	0.18489	0.760528	Rv0101	nrp	unknown non-ribosomal peptide synthase
MT0111	335.128	200.15	331.309	209.999	1.01114	0.0159853	8.0176	0.00151486	0.968953	0.993521	Rv0102	Rv0102	membrane protein
MT0112	334.431	318.106	296.523	279.46	0.882668	-0.180058	8.29083	0.309511	0.577981	0.943349	Rv0103c	ctpB	cation transport ATPase
MT0113	15.278	18.227	10.6335	10.7954	0.640242	-0.64331	3.94224	4.91919	0.02656	0.294615	Rv0104	Rv0104	hypothetical protein
MT0115	16.2655	13.1678	13.9754	11.8986	0.877751	-0.188117	4.18013	0.355879	0.550804	0.93414	Rv0106	Rv0106	conserved hypothetical protein
MT0116	263.153	255.177	168.364	216.5	0.742559	-0.429422	7.72942	1.67887	0.195074	0.769607	Rv0107c	ctpI	probable magnesium transport ATPase
MT0117	464.322	653.121	495.47	873.801	1.22542	0.293271	8.95698	0.490862	0.483543	0.909913
MT0118	31.3692	24.3257	27.5964	30.6528	1.04547	0.064152	4.84697	0.0481493	0.826315	0.983793	Rv0109	PE_PGRS	PE_PGRS-family protein
MT0119	31.253	29.4542	35.1412	35.5777	1.16475	0.220024	4.88842	0.585478	0.444173	0.905045	Rv0110	Rv0110	transmembrane protein
MT0120	251.709	263.771	187.909	211.89	0.775625	-0.366568	7.93431	1.27483	0.258862	0.807727	Rv0111	Rv0111	possible acyltransferase
MT0121	38.224	70.4129	51.3446	73.5981	1.15071	0.202521	5.90891	0.231291	0.630568	0.958956	Rv0112	gca	probable GDP-mannose dehydratase
MT0122	54.4895	95.3623	95.1444	130.885	1.50882	0.593425	6.56779	2.02881	0.154341	0.720585	Rv0113	gmhA	phosphoheptose isomerase
MT0123	32.1825	38.1865	45.4202	53.4256	1.40527	0.490852	5.32058	2.40519	0.120934	0.658846	Rv0115	Rv0115	conserved hypothetical protein
MT0124	16.4398	51.3543	14.8363	23.3245	0.563484	-0.827553	5.33408	1.96397	0.161089	0.72541
MT0125	359.294	208.882	311.713	143.217	0.800574	-0.320894	8.07746	0.497279	0.480698	0.909913	Rv0116c	Rv0116c	conserved hypothetical protein
MT0125.1	18.9958	21.0684	28.5079	31.2831	1.49304	0.578251	4.58226	3.75904	0.0525228	0.424787	Rv0117	oxyS	transcriptional regulator (LysR family)
MT0126	25.7344	33.4045	32.7106	40.2268	1.23425	0.303633	5.01603	0.863455	0.352774	0.869542	Rv0118c	oxcA	oxalyl-CoA decarboxylase
MT0127	40.3152	66.4626	42.1289	64.9697	1.00367	0.00528756	5.79693	0.000186188	0.989113	0.998284	Rv0119	fadD7	acyl-CoA synthase
MT0128	154.987	207.496	145.831	199.519	0.952894	-0.0696131	7.83031	0.0410211	0.839497	0.983793	Rv0120c	fusA2	elongation factor G
MT0129	56.0579	23.702	38.3312	19.2663	0.721352	-0.471224	5.26453	1.0014	0.316973	0.853585
MT0131	100.207	151.013	161.528	124.423	1.13832	0.186904	6.79148	0.295601	0.586654	0.947671	Rv0123	Rv0123	hypothetical protein
MT0132	2.96265	2.28703	4.15213	1.81237	1.12057	0.164238	2.18719	0.167316	0.682508	0.96772	Rv0124	PE_PGRS	PE_PGRS-family protein
MT0133	155.626	170.211	151.603	163.98	0.968586	-0.0460485	7.66175	0.0185236	0.891741	0.987206	Rv0125	pepA	probable serine protease
MT0134	665.608	407.646	419.263	376.422	0.741345	-0.431783	8.81503	1.26888	0.259977	0.807727	Rv0126	Rv0126	probable glycosyl hydrolase
MT0135	267.626	144.083	178.187	138.804	0.769822	-0.377404	7.51306	0.88179	0.347712	0.869542	Rv0127	Rv0127	conserved hypothetical protein
MT0136	43.4522	66.116	47.6482	63.2755	1.01308	0.0187496	5.91675	0.00335192	0.953832	0.993521	Rv0128	Rv0128	hypothetical protein
MT0137	4017	3799.94	1852.2	2458.96	0.551517	-0.858522	11.5465	3.45167	0.0631877	0.465205	Rv0129c	fbpC2	antigen 85C, mycolytransferase
MT0138	47.4024	70.898	37.4198	48.9341	0.730554	-0.452937	5.68757	2.12574	0.144842	0.700677	Rv0130	Rv0130	conserved hypothetical protein
MT0139	128.498	137.846	110.386	104.133	0.805429	-0.312171	6.9694	1.03398	0.309225	0.8488	Rv0131c	fadE1	acyl-CoA dehydrogenase
MT0140	103.228	37.4242	69.4215	35.5777	0.746014	-0.422726	6.07089	0.839334	0.359587	0.869906	Rv0132c	Rv0132c	putative oxidoreductase
MT0141	63.726	58.354	81.169	81.7144	1.33408	0.415847	6.17638	1.96688	0.16078	0.725269	Rv0133	Rv0133	possible puromycin N-acetyltransferase
MT0142	291.037	196.408	244.975	134.155	0.777688	-0.362738	7.82049	0.683557	0.408365	0.895419	Rv0134	ephF	probable epoxide hydrolase
MT0143	171.601	209.298	181.934	127.339	0.811907	-0.300613	7.54414	0.813897	0.366971	0.877317	Rv0135c	Rv0135c	putative transcriptional regulator
MT0144	114.788	133.687	134.691	85.4968	0.886017	-0.174594	6.71537	0.296277	0.586226	0.947666	Rv0136	Rv0136	cytochrome p450
MT0145	232.887	199.18	193.681	182.262	0.870063	-0.200809	7.60013	0.341215	0.559129	0.937175	Rv0137c	Rv0137c	putative peptide methionine sulfoxide
MT0146	40.8381	48.097	60.7122	77.4199	1.55384	0.635841	5.6387	4.5748	0.0324455	0.330249	Rv0138	Rv0138	conserved hypothetical protein
MT0147	38.8049	35.8302	55.6486	60.2811	1.55312	0.635167	5.51228	4.91777	0.0265818	0.294615	Rv0139	Rv0139	putative oxidoreductase
MT0148	43.1617	48.3049	50.8889	49.3675	1.09623	0.132555	5.57495	0.223598	0.636312	0.960875	Rv0140	Rv0140	conserved hypothetical protein
MT0149	231.319	235.149	212.366	228.714	0.945598	-0.0807009	7.60252	0.0644938	0.799529	0.983793	Rv0141c	Rv0141c	hypothetical protein
MT0150	18.7634	21.2763	23.6975	31.8347	1.38826	0.473276	4.38888	2.36613	0.123994	0.663029	Rv0142	Rv0142	hypothetical protein
MT0151	209.128	175.686	263.457	260.154	1.36061	0.444251	7.67027	1.80972	0.178541	0.746729	Rv0143c	Rv0143c	probable chloride channel
MT0152	205.701	304.383	349.741	467.632	1.60257	0.680391	8.13415	3.56669	0.0589498	0.451458	Rv0144	Rv0144	putative transcriptional regulator
MT0153	217.726	280.196	979.497	1248.13	4.47399	2.16156	8.9765	29.6389	5.20499e-08	3.0541e-06	Rv0145	Rv0145	conserved hypothetical protein
MT0154	95.6761	119.549	795.537	1141.52	9.00058	3.17002	8.43453	61.242	5.04732e-15	4.71674e-13	Rv0146	Rv0146	conserved hypothetical protein
MT0155	507.426	410.141	781.663	845.709	1.77353	0.826626	9.0226	5.08405	0.024147	0.275275	Rv0147	Rv0147	aldehyde dehydrogenase
MT0156	522.123	506.127	716.09	947.596	1.61799	0.694202	9.26468	3.64619	0.0561976	0.444897	Rv0148	Rv0148	steroid dehydrogenase
MT0157	187.925	217.892	343.209	436.9	1.92243	0.942928	7.99684	7.84616	0.00509287	0.0954017	Rv0149	Rv0149	putative oxidoreductase
MT0158	1.80083	1.8019	1.92416	1.45778	0.931584	-0.102242	1.11806	0.0804289	0.776717	0.983793
MT0160	73.4853	76.5117	76.9156	77.0259	1.02634	0.0375047	6.13534	0.0176917	0.894185	0.987206
MT0161	21.029	25.9197	21.9252	24.664	0.993208	-0.00983186	4.61458	0.00103484	0.974337	0.993521	Rv0152c	PE	PE-family protein
MT0162	134.713	97.0256	132.716	109.018	1.04287	0.0605585	6.84673	0.0354139	0.850731	0.983793	Rv0153c	Rv0153c	putative protein-tyrosine-phosphatase
MT0163	349.36	244.297	292.725	279.933	0.964565	-0.0520497	8.10389	0.0226933	0.880257	0.987206	Rv0154c	fadE2	acyl-CoA dehydrogenase
MT0165	254.033	260.999	294.548	344.587	1.241	0.3115	8.00971	0.900679	0.3426	0.868385	Rv0157	pntB	pyridine transhydrogenase subunit [beta]
MT0167	80.0496	102.154	215.556	200.858	2.28563	1.19259	6.8889	12.9648	0.000317395	0.010213	Rv0158	Rv0158	transcriptional regulator (TetR/AcrR family)
MT0168	46.4148	63.7597	42.3821	52.3224	0.860098	-0.217428	5.77299	0.459542	0.497838	0.919192	Rv0159c	PE	PE-family protein
MT0169	15.1618	12.6826	19.039	19.0299	1.36586	0.449814	3.96593	2.39061	0.122066	0.661214	Rv0160c	PE	PE-family protein
MT0171	14.1161	11.851	20.5581	18.6359	1.50724	0.591909	4.03699	4.12237	0.0423197	0.37691	Rv0162c	adhE	alcohol dehydrogenase (Zn)
MT0172	35.4356	24.8801	35.2424	23.7973	0.97777	-0.0324333	4.6638	0.00802747	0.928608	0.990937	Rv0163	Rv0163	probable dehydrogenase
MT0173	403.966	596.223	602.008	1057.87	1.65964	0.730871	9.29905	3.03237	0.0816185	0.53743	Rv0164	Rv0164	conserved hypothetical protein
MT0175	191.643	329.263	96.6129	159.725	0.492222	-1.02262	7.47375	6.62837	0.0100367	0.152849	Rv0166	fadD5	acyl-CoA synthase
MT0176	203.319	291.493	145.729	137.819	0.573082	-0.803186	7.60436	5.10311	0.023883	0.27462
MT0177	12.2572	12.1975	12.6589	13.908	1.08684	0.120134	3.66093	0.169012	0.680991	0.96772
MT0178	524.795	651.666	277.281	344.036	0.528154	-0.92097	8.76098	6.47456	0.010943	0.164144	Rv0169	mce1	cell invasion protein
MT0179	308.057	386.855	165.933	195.421	0.520048	-0.943284	7.98837	7.33021	0.0067805	0.117118	Rv0170	Rv0170	part of mce1 operon
MT0180	705.052	806.63	314.397	429.808	0.492328	-1.02231	9.06242	7.52342	0.0060902	0.109459	Rv0171	Rv0171	part of mce1 operon
MT0181	713.533	847.796	363.665	439.304	0.514305	-0.959303	9.12815	7.05167	0.00791915	0.128969	Rv0172	Rv0172	part of mce1 operon
MT0182	450.729	596.223	203.15	295.141	0.475996	-1.07098	8.4958	8.96845	0.00274682	0.0602187	Rv0173	lprK	part of mce1 operon
MT0183	1151.19	1425.24	852.35	1002.6	0.71998	-0.473972	10.0095	1.55587	0.212271	0.778905	Rv0174	Rv0174	part of mce1 operon
MT0184	213.136	230.713	176.162	236.515	0.929855	-0.104922	7.84664	0.0988837	0.753173	0.977278	Rv0175	Rv0175	conserved hypothetical protein
MT0185	130.531	160.993	108.614	151.333	0.891868	-0.165097	7.16141	0.239881	0.624292	0.958352	Rv0176	Rv0176	conserved hypothetical protein
MT0186	218.771	254.9	214.088	249.911	0.979649	-0.0296627	7.83694	0.00828563	0.927472	0.990937	Rv0177	Rv0177	conserved hypothetical protein
MT0187	416.339	380.687	310.852	461.21	0.968713	-0.0458584	8.68338	0.0161952	0.898734	0.987206	Rv0178	Rv0178	conserved hypothetical protein
MT0188	293.767	435.992	249.583	364.602	0.841699	-0.248624	8.40901	0.371114	0.542398	0.931102	Rv0179c	lprO	lipoprotein
MT0189	131.17	181.299	152.464	183.798	1.07633	0.106115	7.3371	0.103803	0.747313	0.973668
MT0190	129.543	105.619	132.868	77.7351	0.895255	-0.159629	6.62031	0.227841	0.63313	0.959069	Rv0181c	Rv0181c	conserved hypothetical protein
MT0191	300.447	173.399	263.913	158.307	0.890899	-0.166666	7.70059	0.175713	0.675084	0.96772	Rv0182c	sigG	sigma-70 factors ECF subfamily
MT0192	200.531	168.617	160.768	167.526	0.889301	-0.169257	7.46459	0.285769	0.592944	0.947849	Rv0183	Rv0183	Probable oxidoreductase
MT0193	74.7633	78.5215	75.4472	94.4798	1.10877	0.148957	6.57402	0.214379	0.643356	0.963585	Rv0184	Rv0184	conserved hypothetical protein
MT0194	33.0539	36.0381	30.1282	39.5176	1.00857	0.012317	5.27659	0.00140193	0.970132	0.993521	Rv0185	Rv0185	conserved hypothetical protein
MT0195	194.489	182.824	163.401	197.076	0.955419	-0.0657941	7.56213	0.0416951	0.838202	0.983793	Rv0186	bglS	[beta]-glucosidase
MT0196	1009.22	892.428	354.095	650.209	0.528144	-0.920998	9.47495	4.35073	0.0369931	0.3506
MT0197	72.6139	47.4733	57.7753	51.4557	0.909101	-0.137488	5.93871	0.198564	0.655882	0.96772	Rv0187	Rv0187	probable o-methyltransferase
MT0198	690.413	432.319	787.841	221.661	0.8991	-0.153447	8.83808	0.0721449	0.788239	0.983793	Rv0188	Rv0188	putative methyltransferase
MT0199	345.468	375.766	297.485	344.745	0.890494	-0.167322	8.27639	0.260676	0.609656	0.953933	Rv0189c	ilvD	dihydroxy-acid dehydratase
MT0200	331.178	324.204	356.982	330.522	1.049	0.0690121	8.81581	0.0347147	0.852195	0.983793	Rv0190	Rv0190	conserved hypothetical protein
MT0201	74.589	81.4322	87.7516	103.227	1.22422	0.291858	6.91489	0.764074	0.382057	0.883856	Rv0191	Rv0191	probable chloramphenicol resistance protein
MT0202	205.875	190.586	228.873	215.475	1.12074	0.164454	7.66284	0.265696	0.606233	0.953062	Rv0192	Rv0192	conserved hypothetical protein
MT0203	18.7634	24.5336	25.2672	34.0411	1.37141	0.455662	4.53044	1.99548	0.157769	0.721076	Rv0193c	Rv0193c	hypothetical protein
MT0204	27.5933	22.3852	23.9	20.2907	0.883391	-0.178877	4.52984	0.328652	0.566454	0.943302	Rv0194	Rv0194	Probable ABC transporter
MT0205	4.06638	5.33641	2.32924	2.56096	0.523165	-0.934663	2.27647	7.25024	0.00708917	0.12025	Rv0195	Rv0195	transcriptional regulator (LuxR/UhpA family)
MT0206	28.6389	66.6012	34.1791	58.0748	0.96953	-0.044643	5.94709	0.011095	0.916112	0.988973	Rv0196	Rv0196	transcriptional regulator (TetR/AcrR family)
MT0207	127.859	240.346	123.855	160.947	0.77364	-0.370265	7.66854	0.859696	0.353824	0.869542	Rv0197	Rv0197	conserved hypothetical protein
MT0208	511.318	684.655	487.267	670.105	0.967767	-0.0472686	9.24207	0.0159326	0.899554	0.987206	Rv0198c	Rv0198c	probable zinc metalloprotease
MT0209	88.8794	75.68	73.5736	70.131	0.873127	-0.195737	5.9918	0.434875	0.509607	0.922431
MT0210	171.717	116.916	138.387	139.356	0.962152	-0.0556632	6.98209	0.0255579	0.872985	0.987206	Rv0200	Rv0200	probable membrane protein
MT0211	66.7467	56.8986	71.4976	68.2792	1.13019	0.176571	6.24338	0.377863	0.538749	0.931102
MT0212	676.123	495.662	714.925	648.475	1.16349	0.218459	9.32669	0.339853	0.559914	0.937175	Rv0202c	mmpL11	conserved large membrane protein
MT0213	70.116	81.2936	68.5607	87.2303	1.02913	0.0414278	6.6943	0.0111669	0.915841	0.988973	Rv0203	Rv0203	hypothetical protein
MT0214	181.012	166.191	173.275	164.65	0.973234	-0.039141	7.4329	0.015598	0.900609	0.987206	Rv0204c	Rv0204c	probable membrane protein
MT0215	53.56	75.4721	59.0918	73.8345	1.03071	0.0436442	6.01915	0.0197598	0.88821	0.987206	Rv0205	Rv0205	probable membrane protein
MT0216	855.973	1057.3	1006.28	1528.15	1.32468	0.405642	10.0889	0.982045	0.321694	0.8543	Rv0206c	mmpL3	conserved large membrane protein
MT0217	170.207	212.971	237.076	334.856	1.49274	0.577966	7.84029	2.56815	0.109035	0.632342	Rv0207c	Rv0207c	conserved hypothetical protein
MT0218	93.4105	108.253	120.057	165.32	1.41535	0.501156	6.90003	2.10357	0.146955	0.704708
MT0219	15.2199	17.5339	22.2291	19.4239	1.27175	0.346815	4.35447	1.33949	0.247124	0.800674	Rv0209	Rv0209	hypothetical protein
MT0220	26.78	25.3653	32.66	34.8291	1.29417	0.372028	4.92693	1.67059	0.196179	0.769607	Rv0210	Rv0210	hypothetical protein
MT0221	2573.32	2811.53	5316.09	5783.48	2.06126	1.04353	11.734	4.59556	0.0320548	0.329731	Rv0211	pckA	phosphoenolpyruvate carboxykinase
MT0222	60.0081	47.9584	44.3569	32.7015	0.713309	-0.4874	5.65179	2.12169	0.145226	0.701517	Rv0212c	nadR	similar to E.coli NadR
MT0223	37.2945	33.4045	31.4954	27.9342	0.840242	-0.251124	4.96034	0.692884	0.405185	0.893199	Rv0213c	Rv0213c	some similarity to methyltransferases
MT0224	72.3235	66.0467	64.2567	68.2004	0.957243	-0.0630429	5.94159	0.0472841	0.827858	0.983793	Rv0214	fadD4	acyl-CoA synthase
MT0225	59.1368	56.6214	50.4838	51.5345	0.881295	-0.182302	5.68156	0.415759	0.519061	0.924097	Rv0215c	fadE3	acyl-CoA dehydrogenase
MT0226	33.7509	34.5827	28.4573	28.0524	0.827009	-0.274025	4.93326	0.895991	0.343859	0.868385	Rv0216	Rv0216	conserved hypothetical protein
MT0227	27.6514	27.6523	25.9761	27.3432	0.964258	-0.0525088	4.64408	0.0332165	0.855383	0.983793	Rv0217c	lipW	probable esterase
MT0228	16.8464	16.0092	17.0642	18.9117	1.09513	0.131103	4.23454	0.192385	0.660939	0.96772	Rv0218	Rv0218	some similarity with sulphitesulfite oxidases
MT0229	7.55185	9.77187	6.07628	7.0525	0.760407	-0.395155	2.9833	1.60982	0.204516	0.772521	Rv0219	Rv0219	hypothetical protein
MT0230	1123.48	760.681	899.847	835.938	0.921234	-0.11836	9.68774	0.0825017	0.773935	0.983793	Rv0220	lipC	probable esterase
MT0231	166.722	146.024	147.147	149.324	0.947925	-0.0771554	7.04176	0.0594094	0.807432	0.983793	Rv0221	Rv0221	conserved hypothetical protein
MT0232	68.7218	60.8489	69.0671	72.0222	1.0888	0.122736	5.92657	0.169856	0.68024	0.96772	Rv0222	echA1	enoyl-CoA hydratase/isomerase superfamily
MT0233	126.639	100.768	92.6633	80.7688	0.762495	-0.391201	6.54889	1.62554	0.202322	0.772521	Rv0223c	Rv0223c	aldehyde dehydrogenase (possible betB)
MT0234	9.99167	10.7421	9.11442	11.0318	0.9732	-0.0391914	3.48892	0.0158067	0.89995	0.987206
MT0235	90.4479	89.818	74.7383	103.108	0.986798	-0.019174	6.66694	0.00394427	0.949923	0.993521	Rv0225	Rv0225	possible involved in LPS synthesis
MT0236	17.6016	16.5637	18.2795	20.3695	1.13135	0.178041	4.60616	0.346921	0.555861	0.937075	Rv0226c	Rv0226c	probable membrane protein
MT0237	662.123	1093.69	469.342	1008.78	0.841884	-0.248306	9.68869	0.281851	0.595491	0.948944	Rv0227c	Rv0227c	possible membrane protein
MT0238	25.6182	22.108	25.9255	23.8761	1.04281	0.0604745	4.59051	0.0423211	0.837009	0.983793
MT0239	120.016	132.648	111.652	112.682	0.887928	-0.171485	6.83636	0.314603	0.574869	0.943349	Rv0229c	Rv0229c	conserved hypothetical protein
MT0240	237.941	208.259	128.058	171.585	0.671599	-0.574327	7.55167	2.98095	0.0842497	0.543533	Rv0230c	Rv0230c	conserved hypothetical protein
MT0241	119.319	191.071	108.36	174.776	0.912413	-0.132242	7.16335	0.112302	0.737539	0.973668	Rv0231	fadE4	acyl-CoA dehydrogenase
MT0242	232.887	177.21	100.765	97.5136	0.483462	-1.04853	7.37877	10.3168	0.00131827	0.0341553	Rv0232	Rv0232	transcriptional regulator (TetR/AcrR family)
MT0244	141.626	142.073	78.6878	95.0314	0.612433	-0.707377	6.82768	5.07783	0.0242337	0.275477	Rv0233	nrdB	ribonucleoside-diphosphate reductase B2
MT0245	214.414	190.378	175.554	152.673	0.810791	-0.302599	7.55703	0.898496	0.343185	0.868385
MT0246	81.9085	47.7505	81.3715	33.7259	0.887084	-0.172857	5.59275	0.158594	0.690455	0.96772	Rv0235c	Rv0235c	conserved hypothetical protein
MT0247	129.485	111.857	132.564	119.498	1.04429	0.0625182	6.99384	0.0418149	0.837973	0.983793	Rv0236c	Rv0236c	possible membrane protein
MT0250	215.402	214.496	253.178	317.165	1.32674	0.407886	7.89803	1.50542	0.21984	0.789959
MT0251	62.6803	74.2246	66.7885	101.414	1.22902	0.297511	6.39928	0.72603	0.394173	0.889399	Rv0237	lpqI	beta-hexosaminidase precursorBETA-HEXOSAMINIDASE A
MT0252	131.751	127.381	171.959	157.834	1.27261	0.347792	7.11149	1.26968	0.259826	0.807727	Rv0238	Rv0238	transcriptional regulator (TetR/AcrR family)
MT0253	109.734	113.381	155.857	185.808	1.53142	0.614874	7.01332	3.79706	0.0513427	0.421517	Rv0239	Rv0239	conserved hypothetical protein
MT0254	16.4979	19.5437	24.1026	19.1875	1.20093	0.264151	4.32225	0.786554	0.375144	0.880485	Rv0240	Rv0240	hypothetical protein
MT0255	271.402	350.817	521.548	480.358	1.61025	0.687288	8.29616	3.93949	0.047165	0.398704	Rv0241c	Rv0241c	hypothetical protein
MT0256	247.701	216.229	449.29	293.683	1.60134	0.679279	7.98878	3.58841	0.0581839	0.450217	Rv0242c	fabG4	3-oxoacyl-[ACP] reductase
MT0257	634.936	637.805	1437.9	1047.47	1.95274	0.965503	9.60159	6.56896	0.0103773	0.156838	Rv0243	fadA2	acetyl-CoA C-acetyltransferase
MT0258	343.086	721.871	11229.4	15209.6	24.8268	4.63382	11.861	59.8833	1.00653e-14	8.73059e-13	Rv0244c	fadE5	acyl-CoA dehydrogenase
MT0259	175.551	142.42	360.121	268.586	1.97699	0.983307	7.6624	7.89499	0.0049572	0.0941867	Rv0245	Rv0245	probable monooxygenase
MT0260	38.8049	38.1865	55.3448	47.9885	1.34181	0.424177	5.38342	2.00206	0.157085	0.721076	Rv0246	Rv0246	probable membrane transport protein
MT0261	524.098	754.236	528.231	1052.36	1.2365	0.306263	9.12583	0.528334	0.467308	0.909913	Rv0247c	Rv0247c	probable iron-sulphur protein
MT0262	675.368	880.023	755.332	1242.38	1.28442	0.361116	9.50667	0.834226	0.361053	0.869929	Rv0248c	Rv0248c	probable flavoprotein subunit of Rv0247c
MT0263	336.696	526.572	430.96	724.949	1.33908	0.421244	8.72557	1.11707	0.290551	0.83223
MT0264	282.846	371.885	120.867	207.596	0.501767	-0.994912	7.947	6.6427	0.00995628	0.152205	Rv0250c	Rv0250c	hypothetical protein
MT0265	197.8	281.513	234.848	484.889	1.50178	0.586673	7.60166	2.20548	0.137521	0.692813	Rv0251c	hsp	possible heat shock protein
MT0266	45.4854	54.7502	90.891	67.0578	1.57569	0.65598	5.89576	4.6252	0.0315056	0.329077	Rv0252	nirB	nitrite reductase flavoprotein
MT0267	9.58504	9.49465	10.5322	11.8198	1.17214	0.229149	3.51362	0.591276	0.441926	0.905045
MT0268	35.3194	45.1862	54.9397	68.6732	1.53638	0.619532	5.53669	4.40817	0.0357671	0.345418	Rv0255c	cobQ	cobyric acid synthase
MT0269	76.3317	105.481	87.5491	124.423	1.16621	0.221828	6.56493	0.356297	0.55057	0.93414	Rv0256c	PPE	PPE-family protein
MT0270	19.751	29.177	36.4071	39.8722	1.56065	0.642149	4.72719	4.46796	0.0345363	0.339743
MT0270.1	4.53111	3.53451	5.46865	4.64913	1.24732	0.318829	2.21159	1.03051	0.310038	0.8488
MT0270.2	9.46885	3.3959	9.62078	3.62475	1.02284	0.032583	2.82613	0.00421985	0.948206	0.993521
MT0271	34.5061	22.3159	39.6477	19.5421	1.04032	0.0570268	4.72078	0.0188473	0.890805	0.987206	Rv0258c	Rv0258c	conserved hypothetical protein
MT0272	8.36512	7.20762	13.3172	11.3076	1.57823	0.65831	3.75613	3.7646	0.0523485	0.424534	Rv0259c	Rv0259c	conserved hypothetical protein
MT0273	22.3651	10.95	128.918	17.1388	4.3797	2.13083	5.20285	8.36426	0.00382673	0.0779012	Rv0260c	Rv0260c	two-component response regulator
MT0274	7.31948	5.82154	7.49408	5.08253	0.952528	-0.0701662	2.92551	0.0418527	0.837901	0.983793	Rv0261c	narK3	nitrite extrusion protein1
MT0275	79.8753	67.2942	65.5226	89.0427	1.05036	0.0708867	6.19716	0.0564106	0.812262	0.983793	Rv0262c	Rv0262c	aminoglycoside 2'-N-acetyltransferase
MT0276	127.684	69.5812	55.8005	83.0146	0.703705	-0.506957	6.48695	2.01927	0.155314	0.720585	Rv0263c	Rv0263c	conserved hypothetical protein
MT0277	60.1243	42.8992	39.5465	54.0954	0.908958	-0.137714	5.617	0.188914	0.663822	0.96772	Rv0264c	Rv0264c	conserved hypothetical protein
MT0278	227.427	129.46	190.34	118.395	0.864896	-0.209401	7.12526	0.265132	0.606616	0.953211	Rv0265c	fecB2	iron transport protein FeIII dicitrate transporter
MT0280	3.54356	3.81172	7.49408	3.15195	1.43911	0.525181	2.2465	1.69802	0.192547	0.765795	Rv0267	narU	similar to nitrite extrusion protein 2
MT0281	118.215	170.765	138.286	134.47	0.943982	-0.0831688	6.98684	0.0667611	0.796112	0.983793	Rv0268c	Rv0268c	hypothetical protein
MT0282	59.95	42.5527	59.3957	52.5588	1.09171	0.126594	5.66431	0.139008	0.709269	0.969441	Rv0269c	Rv0269c	conserved hypothetical protein
MT0283	774.355	620.826	535.472	388.833	0.662473	-0.594067	9.04414	2.6394	0.104243	0.61619	Rv0270	fadD2	acyl-CoA synthase
MT0284	494.878	474.109	871.339	523.618	1.43955	0.525619	8.90632	1.90707	0.167289	0.733136	Rv0271c	fadE6	acyl-CoA dehydrogenase
MT0285	120.539	141.311	182.643	152.121	1.27845	0.354399	7.12788	1.27916	0.258055	0.807559	Rv0272c	Rv0272c	hypothetical protein
MT0286	46.1244	42.2062	78.4853	60.5569	1.57344	0.653926	5.90807	4.74063	0.0294583	0.314274	Rv0273c	Rv0273c	putative transcriptional regulator
MT0286.1	159.344	148.796	281.231	128.679	1.33005	0.411477	7.31707	1.11972	0.28998	0.831386	Rv0274	Rv0274	hypothetical protein
MT0287	1112.45	671.764	750.37	404.553	0.647279	-0.627541	9.65982	1.72066	0.189608	0.764717	Rv0275c	fadD27	acyl-CoA synthase
MT0288	987.724	807.461	1450.71	815.923	1.26259	0.336383	9.71576	0.645911	0.421579	0.902787	Rv0276	Rv0276	conserved hypothetical protein
MT0289	137.734	135.975	219.202	152.042	1.35618	0.439554	7.54166	1.75308	0.18549	0.76142
MT0290	291.443	271.88	467.519	353.373	1.45716	0.543154	8.44315	2.52826	0.111824	0.634258
MT0291	35.668	22.3852	26.685	19.7391	0.798477	-0.324678	4.69593	0.984013	0.32121	0.8543
MT0291.4	8.19085	5.47502	9.72205	3.90054	0.990086	-0.0143744	2.78284	0.00129924	0.971246	0.993521
MT0292	27.419	47.404	28.913	24.861	0.718997	-0.475943	4.87131	1.65788	0.19789	0.771336	Rv0280	PPE	PPE-family protein
MT0293	239.219	260.306	272.926	257.16	1.06119	0.0856768	7.95585	0.0692108	0.792489	0.983793	Rv0281	Rv0281	conserved hypothetical protein
MT0294	3.31119	4.29685	2.48115	7.60409	1.33267	0.414315	2.84532	0.618449	0.431624	0.905045
MT0295	834.421	1150.65	908.505	1783.49	1.35615	0.439514	10.4333	0.934862	0.333603	0.862095	Rv0282	Rv0282	conserved hypothetical protein
MT0296	351.684	487.069	422.555	732.16	1.37679	0.461304	9.09557	1.3465	0.245891	0.798945	Rv0283	Rv0283	conserved hypothetical protein
MT0297	1352.94	2404.43	1308.73	2646.77	1.05275	0.0741579	11.0159	0.022479	0.88082	0.987206	Rv0284	Rv0284	conserved hypothetical protein
MT0298	21.029	43.1071	33.3689	52.2436	1.33592	0.417831	5.9979	0.791463	0.373658	0.878824
MT0299	586.488	1137.56	666.366	1146.44	1.05153	0.0724832	9.91823	0.0248538	0.874732	0.987206	Rv0286	PPE	PPE-family protein
MT0300	399.551	975.454	489.799	1132.85	1.18016	0.238977	9.81547	0.195425	0.65844	0.96772	Rv0287	Rv0287	conserved hypothetical protein
MT0301	435.103	769.067	466.962	958.864	1.18413	0.243828	9.58834	0.262965	0.60809	0.953211	Rv0288	Rv0288	conserved hypothetical protein
MT0302	475.302	668.507	603.172	871.634	1.28943	0.366739	9.56548	0.92211	0.336922	0.864513	Rv0289	Rv0289	conserved hypothetical protein
MT0303	286.68	318.313	397.591	501.318	1.48587	0.571307	8.86286	2.67272	0.102081	0.607918
MT0304	323.974	336.54	336.677	411.566	1.13285	0.179956	8.83071	0.253912	0.614334	0.956297	Rv0291	Rv0291	secreted protease
MT0305	140.232	149.004	171.047	235.49	1.40568	0.491272	7.83178	2.09893	0.147402	0.705196	Rv0292	Rv0292	unknown possible membrane protein
MT0306	492.787	307.433	545.498	232.89	0.972628	-0.0400405	8.56086	0.00795601	0.928926	0.990937	Rv0293c	Rv0293c	conserved hypothetical protein
MT0307	8.30703	9.84117	6.17755	11.2288	0.962899	-0.0545438	3.46811	0.0232198	0.878887	0.987206	Rv0294	Rv0294	conserved hypothetical protein
MT0308	64.7716	68.4031	76.865	104.014	1.35853	0.442047	6.29757	2.0812	0.149123	0.70941	Rv0295c	Rv0295c	hypothetical protein
MT0310	125.419	180.953	143.755	197.234	1.11318	0.154688	7.3744	0.171648	0.678651	0.96772	Rv0296c	atsG	proable arylsulfatase
MT0311	114.73	103.055	105.12	110.279	0.989009	-0.0159447	6.86687	0.00281046	0.957721	0.993521	Rv0297	PE_PGRS	PE_PGRS-family protein
MT0312	139.419	172.844	186.086	277.963	1.48626	0.571686	7.42329	2.36152	0.124361	0.663029	Rv0298	Rv0298	hypothetical protein
MT0313	49.2032	54.5423	67.2442	77.5775	1.39623	0.481539	5.86075	2.48156	0.115188	0.645506
MT0314	98.3483	93.4911	116.31	108.309	1.17077	0.227456	6.69686	0.592045	0.441629	0.905045	Rv0301	Rv0301	conserved hypothetical protein
MT0315	34.9128	47.7505	59.902	71.7858	1.59385	0.672517	5.7555	4.13637	0.0419711	0.37691	Rv0302	Rv0302	transcriptional regulator (TetR/AcrR family)
MT0316	22.8879	19.3358	27.2926	38.2568	1.55249	0.634585	4.81487	3.81577	0.0507722	0.419423
MT0318	414.596	455.535	337.892	365.154	0.807998	-0.307577	8.44462	0.866523	0.35192	0.869542	Rv0304c	PPE	PPE-family protein
MT0319	13.1286	12.9599	14.2286	14.893	1.11638	0.158829	3.77678	0.297013	0.585761	0.947456
MT0320	30.1493	16.7023	40.7617	23.5215	1.36974	0.453897	4.91994	1.39067	0.238293	0.796009	Rv0307c	Rv0307c	hypothetical protein
MT0321	222.838	404.666	271.559	390.842	1.05573	0.0782442	8.1934	0.0406334	0.840247	0.983793	Rv0308	Rv0308	conserved hypothetical protein
MT0322	402.746	638.013	473.747	823.448	1.24646	0.317841	8.90561	0.592322	0.441523	0.905045	Rv0309	Rv0309	hypothetical protein
MT0323	25.6182	33.6125	28.7104	39.4388	1.15183	0.203931	4.89593	0.434456	0.50981	0.922431	Rv0310c	Rv0310c	conserved hypothetical protein
MT0324	301.551	104.996	256.166	91.8401	0.855849	-0.224572	7.33321	0.158656	0.690397	0.96772	Rv0311	Rv0311	hypothetical protein
MT0325	27.7095	12.544	39.2933	11.9774	1.27172	0.346782	4.32618	0.386595	0.534095	0.931102
MT0326	256.995	384.776	245.532	374.846	0.966739	-0.0488012	8.38374	0.0117954	0.913515	0.988973	Rv0312	Rv0312	conserved hypothetical protein
MT0327	402.455	341.253	292.168	247.034	0.724983	-0.463981	8.35271	1.89695	0.16842	0.733136	Rv0313	Rv0313	hypothetical protein
MT0328	66.5724	39.7805	68.2569	59.8083	1.20336	0.267074	5.67477	0.674963	0.411327	0.897867
MT0328.1	32.8796	35.2758	31.6979	28.801	0.887615	-0.171994	5.03723	0.33978	0.559956	0.937175
MT0328.2	71.4521	40.6122	62.4844	56.2624	1.05894	0.0826182	6.07644	0.0656964	0.797709	0.983793
MT0329	158.356	289.136	204.923	343.011	1.22463	0.29235	7.9001	0.49914	0.479878	0.909913	Rv0315	Rv0315	probable [beta]-1,3-glucanase
MT0330	25.7344	28.7612	31.2929	45.4275	1.40853	0.494192	5.25194	1.71354	0.190527	0.764717
MT0332	133.087	90.0259	92.1063	71.7858	0.734344	-0.445471	6.5482	1.71337	0.190548	0.764717	Rv0317c	glpQ2	glycerophosphoryl diester phosphodiesterase
MT0333	10.9792	18.9893	12.9121	19.0693	1.07019	0.0978604	3.99208	0.0784365	0.779427	0.983793
MT0334	13.8257	16.2171	18.1276	16.1932	1.14262	0.192347	3.88698	0.43073	0.511631	0.922431
MT0335	5.80911	6.7918	5.72183	6.5797	0.978733	-0.0310134	2.16061	0.00880067	0.925259	0.990937	Rv0320	Rv0320	conserved hypothetical protein
MT0336	117.518	152.607	106.284	178.282	1.05373	0.0755104	6.99994	0.0467106	0.828889	0.983793
MT0337	24.3983	40.4043	24.9634	38.5326	0.981182	-0.0274079	5.04948	0.00612338	0.937628	0.991666	Rv0322	udgA	UDP-glucose dehydrogenase/GDP-mannose
MT0338	19.112	20.514	19.6973	21.3151	1.0355	0.0503284	4.29777	0.0296349	0.863321	0.986441	Rv0323c	Rv0323c	conserved hypothetical protein
MT0339	13.1286	11.0193	14.2793	8.23448	0.929375	-0.105666	3.66066	0.0977858	0.754503	0.977425	Rv0324	Rv0324	putative transcriptional regulator
MT0340	7.60994	7.55414	8.50679	8.15568	1.0983	0.135275	3.06227	0.19898	0.655545	0.96772	Rv0325	Rv0325	hypothetical protein
MT0341	9.35267	10.4649	10.3297	8.19508	0.934041	-0.0984425	3.21241	0.0955243	0.757268	0.977484	Rv0326	Rv0326	hypothetical protein
MT0342	7.60994	11.4352	31.3941	30.7316	3.26818	1.70849	4.90771	28.4767	9.48349e-08	5.25544e-06	Rv0327c	Rv0327c	cytochrome P-450 monooxygenasemonoxygenase
MT0343	32.0082	25.6425	41.7744	28.9192	1.22497	0.292744	5.24306	0.814362	0.366834	0.877317	Rv0328	Rv0328	transcriptional regulator (TetR/AcrR family)
MT0344	3.9502	4.08894	4.10149	6.06751	1.26995	0.344773	2.42703	0.98845	0.320122	0.8543	Rv0329c	Rv0329c	conserved hypothetical protein
MT0345	6.09957	2.77216	5.36738	5.00373	1.15972	0.213774	2.56518	0.352013	0.552976	0.934904
MT0346	19.6929	17.5339	21.5708	16.0356	1.00879	0.0126269	4.38581	0.00172216	0.966898	0.993521	Rv0331	Rv0331	putative dehydrogenase
MT0348	106.539	114.629	90.0809	109.924	0.904481	-0.144838	6.60759	0.242722	0.622247	0.958306	Rv0334	rmlA	glucose-1-phosphate thymidyltransferase
MT0349	8.48131	4.71267	6.22819	2.00937	0.61931	-0.691266	2.95088	2.09615	0.14767	0.705533	Rv0335c	PE	PE-family protein
MT0350	333.792	290.661	157.578	120.838	0.44584	-1.1654	8.37543	5.84872	0.0155884	0.205273	Rv0336	Rv0336	conserved hypothetical protein
MT0351	538.156	515.553	474.254	431.936	0.859989	-0.217609	8.86529	0.40653	0.523736	0.928346	Rv0337c	aspC	aspartate aminotransferase
MT0352	1876.87	1601.75	1603.83	1212.24	0.809531	-0.304841	10.393	0.507749	0.476115	0.909913	Rv0338c	Rv0338c	conserved hypothetical protein
MT0353	159.518	126.272	124.665	88.1759	0.74458	-0.425502	7.00223	1.51309	0.218668	0.78979	Rv0339c	Rv0339c	conserved hypothetical protein
MT0355	77.8421	53.2948	69.4215	39.557	0.830363	-0.268186	5.80002	0.639372	0.423938	0.905037	Rv0340	Rv0340	hypothetical protein
MT0356	1454.25	581.669	210.391	144.635	0.174373	-2.51975	8.88611	25.4922	4.44164e-07	2.30158e-05	Rv0341	Rv0341	conserved hypothetical protein
MT0357	749.376	457.337	210.898	158.543	0.306134	-1.70776	8.37126	18.1443	2.04781e-05	0.000801057	Rv0342	Rv0342	conserved hypothetical protein
MT0357.1	257.692	171.181	137.172	81.5174	0.509806	-0.971978	7.43578	5.90909	0.0150629	0.201682	Rv0343	Rv0343	conserved hypothetical protein
MT0359	105.145	123.361	62.0287	68.5944	0.571755	-0.806532	6.56432	6.04835	0.0139193	0.18955	Rv0344c	lpqJ	lipoprotein
MT0360	35.2613	23.0089	34.888	26.7128	1.05584	0.0783865	4.98201	0.0566944	0.811799	0.983793	Rv0345	Rv0345	unknown possible membrane protein
MT0361	359.584	630.251	367.159	614.473	0.99178	-0.0119073	8.99335	0.000766491	0.977913	0.994292	Rv0346c	aroP2	probable aromatic amino acid permease
MT0362	327.866	457.753	256.368	343.957	0.764206	-0.387967	8.38671	1.09736	0.294846	0.832566	Rv0347	Rv0347	conserved hypothetical protein
MT0363	119.319	152.469	114.032	140.42	0.936375	-0.0948411	7.0393	0.0772864	0.781009	0.983793
MT0364	79.1201	105.481	88.7643	105.669	1.05359	0.0753079	6.48275	0.0613124	0.804433	0.983793	Rv0349	Rv0349	hypothetical protein
MT0365	2589.47	4216.73	2123.31	3976.07	0.896157	-0.158176	11.4013	0.104496	0.7465	0.973668	Rv0350	dnaK	70 kD heat shock protein, chromosome replication
MT0366	934.57	1081.77	394.503	737.282	0.561335	-0.833067	9.43902	4.26461	0.0389142	0.361087	Rv0351	grpE	stimulates DnaK ATPase activity
MT0367	636.214	716.396	497.496	633.464	0.836155	-0.258158	9.1418	0.500969	0.479074	0.909913	Rv0352	dnaJ	acts with GrpE to stimulate DnaK ATPase
MT0368	185.136	195.368	143.35	180.883	0.852205	-0.230728	7.26573	0.550356	0.458172	0.907454	Rv0353	hspR	heat shock regulator
MT0369	22.6555	18.5042	28.3053	24.5852	1.28368	0.360282	4.48227	1.43217	0.231411	0.792407	Rv0354c	PPE	PPE-family protein
MT0370	612.048	548.126	542.156	507.149	0.904426	-0.144926	8.99004	0.173974	0.676604	0.96772
MT0372	46.6472	60.3638	39.6477	50.3131	0.841208	-0.249466	5.62016	0.655017	0.418325	0.90103	Rv0356c	Rv0356c	hypothetical protein
MT0373	136.572	162.726	105.12	131.436	0.790522	-0.339122	6.95488	1.1749	0.278397	0.819333	Rv0357c	purA	adenylosuccinate synthase
MT0374	17.6016	23.6327	20.9632	27.1462	1.16844	0.224578	4.34175	0.522025	0.469979	0.909913	Rv0358	Rv0358	hypothetical protein
MT0375	10.1659	12.7519	14.9882	19.7391	1.51817	0.602331	3.85668	3.63899	0.056441	0.445698	Rv0359	Rv0359	conserved hypothetical protein
MT0376	21.3775	17.7418	11.1398	11.1894	0.570663	-0.809289	4.0203	5.76151	0.016381	0.211171
MT0377	304.049	300.086	442.657	446.75	1.47219	0.557961	8.42277	2.89781	0.0887002	0.555595
MT0378	17.6597	23.9792	24.6596	28.013	1.26643	0.340769	4.57536	1.24117	0.265246	0.80981	Rv0362	mgtE	putative magnesium ion transporter
MT0379	370.854	402.864	412.124	435.994	1.09618	0.132482	8.43088	0.163516	0.68594	0.96772	Rv0363c	fba	fructose bisphosphate aldolase
MT0380	129.659	174.646	156.059	230.132	1.26933	0.344071	7.43299	1.0295	0.310276	0.8488	Rv0364	Rv0364	conserved hypothetical protein
MT0381	77.9002	51.3543	74.7383	42.7878	0.908614	-0.138261	5.8937	0.151141	0.697448	0.96772	Rv0365c	Rv0365c	conserved hypothetical protein
MT0382	8.82985	11.2273	9.67142	9.37706	0.950515	-0.073218	3.65338	0.0368462	0.847779	0.983793	Rv0366c	Rv0366c	conserved hypothetical protein
MT0384	3.54356	2.56425	2.58242	2.71856	0.864711	-0.20971	2.05766	0.37603	0.539736	0.931102	Rv0368c	Rv0368c	conserved hypothetical protein
MT0384.1	23.3526	18.92	15.5958	17.2176	0.776109	-0.365668	4.43124	1.44228	0.22977	0.792407	Rv0369c	Rv0369c	putative CO dehydrogenase gene cluster
MT0385	11.5601	14.9697	13.064	19.8179	1.24214	0.312829	4.6766	0.856396	0.354749	0.869542	Rv0370c	Rv0370c	putative CO dehydrogenase gene cluster
MT0388	19.0539	17.0488	15.849	18.3601	0.947737	-0.0774408	4.31188	0.0705934	0.790475	0.983793	Rv0373c	Rv0373c	putative CO dehydrogenase gene cluster
MT0389	2.32365	1.94051	2.1267	1.81237	0.917244	-0.124623	1.14033	0.118924	0.730205	0.973668	Rv0374c	Rv0374c	putative CO dehydrogenase gene cluster
MT0390	6.73857	4.15824	4.50658	4.53093	0.825747	-0.276228	2.61123	0.72496	0.394522	0.889399	Rv0375c	Rv0375c	putative CO dehydrogenase gene cluster
MT0391	58.672	25.4346	46.5342	22.1425	0.815596	-0.294073	5.4665	0.44684	0.503839	0.922431	Rv0377	Rv0377	transcriptional regulator (LysR family)
MT0392	4.12447	3.53451	4.70912	5.20072	1.29243	0.370081	2.18109	1.1044	0.293302	0.832566
MT0393	9.46885	6.44528	5.97501	8.74667	0.925364	-0.111908	3.28722	0.107275	0.743268	0.973668	Rv0380c	Rv0380c	some similarity with methyltransferases
MT0394	13.5352	10.7421	10.3803	11.8592	0.915708	-0.12704	3.83559	0.18369	0.668221	0.96772	Rv0381c	Rv0381c	hypothetical protein
MT0395	47.9833	48.998	51.9522	48.0673	1.03125	0.0443877	5.83597	0.0228482	0.879852	0.987206	Rv0382c	umpA	probable uridine 5'-monophosphate synthase
MT0396	455.841	480.416	394.249	315.668	0.758234	-0.399285	8.57812	1.41333	0.234505	0.792601	Rv0383c	Rv0383c	unknown possible membrane protein
MT0397	286.68	368.351	301.941	468.183	1.1758	0.233645	8.47383	0.415274	0.519305	0.924097	Rv0384c	clpB	heat shock protein
MT0398	46.8795	30.7017	44.6607	30.2588	0.964644	-0.0519313	5.62254	0.0239555	0.876998	0.987206	Rv0385	Rv0385	similar to oxidoreductases
MT0399	254.149	188.438	219.455	162.483	0.862845	-0.212827	7.36111	0.396359	0.528976	0.930605	Rv0386	Rv0386	transcriptional regulator (LuxR/UhpA family)
MT0400	40.2572	24.7415	42.6859	36.2475	1.2132	0.278823	5.03615	0.666427	0.4143	0.899192	Rv0387c	Rv0387c	conserved hypothetical protein
MT0401	56.755	31.9492	56.9145	30.8892	0.988864	-0.0161567	5.4358	0.00170593	0.967054	0.993521	Rv0389	purT	phosphoribosylglycinamide formyltransferase II
MT0401.1	73.5434	85.6598	83.0425	109.924	1.21244	0.277919	6.25647	0.865166	0.352297	0.869542
MT0402	74.589	75.4028	74.4345	79.7444	1.02799	0.0398282	6.12514	0.0198423	0.887978	0.987206	Rv0391	metZ	o-succinylhomoserine sulfhydrylase
MT0403	172.647	194.606	110.285	107.127	0.592023	-0.756276	7.04001	6.07104	0.0137416	0.188415	Rv0392c	Rv0392c	possible dehydrogenasedehydrogemase
MT0404	2.67219	1.87121	2.53178	1.49718	0.871095	-0.199099	1.27266	0.298001	0.585138	0.947456	Rv0393	Rv0393	conserved hypothetical protein
MT0404.1	86.6139	103.679	79.7512	88.5305	0.884529	-0.177018	6.37538	0.370855	0.542538	0.931102	Rv0394c	Rv0394c	hypothetical protein
MT0407	11.7344	14.0687	14.6337	12.6078	1.0559	0.0784665	3.61057	0.067306	0.7953	0.983793
MT0407.1	64.3069	80.7392	85.9794	71.7464	1.08747	0.12097	6.60804	0.157137	0.691806	0.96772
MT0408	16.2655	10.8114	18.3808	10.2833	1.05536	0.0777391	3.83766	0.0455543	0.830988	0.983793	Rv0398c	Rv0398c	hypothetical protein
MT0409	159.634	114.975	122.893	98.6168	0.806454	-0.310337	6.72184	0.887282	0.346215	0.869542	Rv0399c	lpqK	possible PBP
MT0410	211.336	94.3228	136.716	77.8927	0.701894	-0.510676	7.03138	1.49554	0.221358	0.790151	Rv0400c	fadE7	acyl-CoA dehydrogenase
MT0411	5.9253	4.43546	6.73455	5.90991	1.21533	0.281345	2.79117	0.725812	0.394244	0.889399	Rv0401	Rv0401	probable membrane protein
MT0412	62.8546	76.3037	71.4976	78.9959	1.08173	0.113334	6.44736	0.137959	0.710319	0.969441	Rv0402c	mmpL1	conserved large membrane protein
MT0413	23.2365	19.9596	23.7988	19.6603	1.0051	0.00733243	4.32455	0.000575444	0.980862	0.995304
MT0414	8.65558	7.41553	7.44345	8.15568	0.970228	-0.0436036	2.91191	0.0214913	0.883449	0.987206
MT0415	8.19085	12.4054	7.29154	12.0168	0.941682	-0.0866879	3.42801	0.0633205	0.801323	0.983793	Rv0403c	mmpS1	conserved small membrane protein
MT0417	87.0786	150.043	69.776	107.403	0.747497	-0.41986	6.70259	1.20866	0.271599	0.814796
MT0418	132.68	164.805	108.917	129.861	0.802804	-0.316881	7.13919	1.02853	0.310504	0.8488	Rv0405	pks6	polyketide synthase
MT0419	64.4812	38.9489	52.4079	47.7521	0.967826	-0.0471801	5.71787	0.0194842	0.888987	0.987206
MT0420	199.95	181.784	177.731	189.078	0.960896	-0.0575483	7.51156	0.0279074	0.867327	0.987193	Rv0407	Rv0407	probable coenzyme F420-dependent enzyme
MT0421	257.053	195.715	212.315	205.941	0.923717	-0.114477	7.691	0.111552	0.738384	0.973668	Rv0408	pta	phosphate acetyltransferase
MT0422	110.257	80.8778	93.4735	86.7969	0.942945	-0.0847542	6.53898	0.0702463	0.790979	0.983793	Rv0409	ackA	acetate kinase
MT0423	1831.44	1234.1	881.061	477.718	0.443234	-1.17386	9.83051	5.59392	0.0180229	0.226137	Rv0410c	pknG	serine-threonine protein kinase
MT0424	934.454	577.233	502.711	241.715	0.492419	-1.02204	8.85646	4.69206	0.0303023	0.319833	Rv0411c	glnH	putative glutamine binding protein
MT0425	1464.3	893.468	692.797	257.515	0.403037	-1.31101	9.35781	6.36757	0.0116224	0.168323	Rv0412c	Rv0412c	unknown probable membrane protein
MT0426	75.867	42.5527	60.1046	38.0598	0.828221	-0.271911	6.0288	0.613465	0.433486	0.905045	Rv0413	mutT3	MutT homologue
MT0427	15.8008	8.73231	13.5197	8.27388	0.884753	-0.176654	3.63369	0.241022	0.623469	0.958352	Rv0414c	thiE	thiamine synthesis, thiazole moiety
MT0428	91.7259	70.205	59.2437	54.056	0.699477	-0.51565	6.21949	2.97854	0.0843756	0.543533	Rv0415	Rv0415	conserved hypothetical protein
MT0429	6.85475	5.40571	4.35467	6.02811	0.848094	-0.237703	2.53475	0.500061	0.479473	0.909913	Rv0416	Rv0416	conserved hypothetical protein
MT0430	48.6223	37.0777	31.4954	32.3863	0.745192	-0.424317	5.28901	1.96232	0.161266	0.72541	Rv0417	thiG	thiamine synthesis, thiazole moiety
MT0431	1.10373	1.59399	1.31653	2.44276	1.42022	0.506119	1.0683	1.50663	0.219654	0.789959
MT0432	289.236	322.194	288.775	291.004	0.948256	-0.0766512	8.18809	0.0566811	0.811821	0.983793	Rv0418	lpqL	probable aminopeptidase Y
MT0433	289.236	281.652	254.647	221.937	0.834785	-0.260524	8.19174	0.647576	0.420981	0.902787	Rv0419	lpqM	possible zinc metallopeptidase
MT0434	57.7426	115.322	64.358	89.3973	0.888868	-0.169958	6.66286	0.202022	0.653093	0.96772
MT0435	21.9584	15.6627	24.0013	23.5609	1.26267	0.336473	4.46988	1.2512	0.263324	0.809797	Rv0421c	Rv0421c	hypothetical protein
MT0436	75.9251	85.6598	97.0686	129.939	1.4052	0.490779	6.63398	2.53564	0.111301	0.633841	Rv0422c	thiD	phosphomethylpyrimidine kinase
MT0437	1043.96	1245.6	920.101	1289.62	0.965148	-0.0511781	10.1213	0.0167752	0.896947	0.987206
MT0438	119.668	148.172	150.641	228.438	1.41558	0.501393	7.29997	2.24822	0.133768	0.682391
MT0440	701.741	457.615	602.868	570.78	1.01229	0.0176283	9.37584	0.00217548	0.962799	0.993521	Rv0425c	ctpH	C-terminal region putative cation-transporting
MT0441	176.539	166.26	161.832	160.277	0.939623	-0.0898465	7.58946	0.0756877	0.783229	0.983793	Rv0426c	Rv0426c	hypothetical protein
MT0442	84.4645	75.2642	85.6756	88.4911	1.0903	0.12473	6.38955	0.184135	0.667843	0.96772	Rv0427c	xthA	exodeoxyribonuclease III
MT0443	85.394	70.8287	57.674	67.9246	0.803999	-0.314734	6.21303	1.12111	0.289679	0.831386	Rv0428c	Rv0428c	hypothetical protein
MT0444	53.7343	77.3433	55.4967	69.7764	0.956227	-0.0645748	6.02834	0.0413863	0.838794	0.983793	Rv0429c	def	polypeptide deformylase
MT0445	268.207	356.639	260.824	249.792	0.817224	-0.291197	8.24469	0.749291	0.386701	0.886039	Rv0430	Rv0430	hypothetical protein
MT0446	183.278	184.557	159.705	189.748	0.950086	-0.0738702	7.44029	0.0544227	0.815539	0.983793	Rv0431	Rv0431	tuberculin related peptide (AT103)
MT0447	213.775	196.408	222.189	250.186	1.15162	0.203669	7.86123	0.390252	0.532167	0.931102	Rv0432	sodC	superoxide dismutase precursor (Cu-Zn)
MT0448	231.203	275.206	249.938	348.843	1.18251	0.24185	8.01497	0.50945	0.475377	0.909913	Rv0433	Rv0433	conserved hypothetical protein
MT0449	39.9086	43.7308	51.2939	61.5025	1.34905	0.431949	5.60621	2.1952	0.138441	0.693073
MT0450	2.49792	2.07912	2.32924	4.09754	1.4096	0.495286	1.78992	1.71147	0.190794	0.764717
MT0451	138.896	96.8177	136.413	118.395	1.08077	0.112059	7.03267	0.111538	0.7384	0.973668	Rv0435c	Rv0435c	ATPase of AAA-family
MT0452	129.195	164.666	147.704	174.303	1.09595	0.132183	7.18657	0.177597	0.673447	0.96772	Rv0436c	pssA	CDP-diacylglycerol-serine o-phosphatidyltransferase
MT0453	41.4771	30.4938	44.5594	36.1687	1.12071	0.164416	5.45037	0.28677	0.592298	0.947849	Rv0437c	psd	putative phosphatidylserine decarboxylase
MT0454	84.3483	67.2249	80.7133	58.7445	0.919652	-0.12084	6.25875	0.153242	0.695456	0.96772	Rv0438c	moaA3	molybdenum cofactor biosynthesis, protein A
MT0455	103.809	103.332	120.665	115.046	1.13788	0.186354	6.69572	0.379632	0.5378	0.931102	Rv0439c	Rv0439c	Probable oxidoreductase
MT0456	5394.57	5846.28	4443.28	4227.01	0.77132	-0.374599	12.263	0.627941	0.428112	0.905045	Rv0440	groEL2	60 kD chaperonin 2
MT0457	102.763	55.0967	72.2065	50.7465	0.778528	-0.361179	6.17264	0.779061	0.377428	0.882804	Rv0441c	Rv0441c	65 kDa antigen
MT0458	77.7259	65.423	60.0539	57.1292	0.818462	-0.289012	5.961	0.874087	0.349826	0.869542	Rv0442c	PPE	PPE-family protein
MT0459	153.651	109.362	183.656	127.26	1.18187	0.241071	6.93524	0.436011	0.509054	0.922431	Rv0443	Rv0443	hypothetical protein
MT0460	218.539	139.648	165.629	139.395	0.851432	-0.232037	7.46087	0.462568	0.496426	0.918296	Rv0444c	Rv0444c	conserved hypothetical protein
MT0461	142.788	112.619	137.121	120.996	1.01044	0.0149842	6.98873	0.00229344	0.961804	0.993521	Rv0445c	sigK	ECF-type sigma factor
MT0462	42.1161	52.0473	44.0024	60.7933	1.11368	0.155333	5.56242	0.272997	0.601328	0.95053	Rv0446c	Rv0446c	conserved hypothetical protein
MT0463	62.8546	69.3733	62.7882	84.9452	1.11766	0.160475	6.07165	0.285623	0.593039	0.947849	Rv0447c	ufaA1	unknown fatty acid methyltransferase
MT0465	15.5684	22.3159	23.7481	39.8328	1.68089	0.749227	4.97796	4.61297	0.0317311	0.32923	Rv0449c	Rv0449c	putative dehydrogenase
MT0466	450.497	791.729	566.968	1122.37	1.35999	0.443597	9.56872	0.966786	0.325483	0.855997	Rv0450c	mmpL4	conserved large membrane protein
MT0467	95.3856	161.617	100.816	202.277	1.17965	0.238363	7.2421	0.318948	0.572241	0.943349
MT0468	40.3152	48.79	98.537	111.461	2.35741	1.2372	6.25919	17.1394	3.47347e-05	0.00134555	Rv0452	Rv0452	putative transcriptional regulator
MT0469	16.9626	16.2864	27.2926	35.7353	1.8961	0.923032	4.51073	9.52133	0.00203097	0.0479501	Rv0453	PPE	PPE-family protein
MT0470	278.896	300.849	311.612	321.263	1.09166	0.12653	8.00595	0.153808	0.694923	0.96772
MT0471	1119.59	969.91	1114.09	1102.79	1.06095	0.0853616	9.82161	0.0482044	0.826218	0.983793	Rv0455c	Rv0455c	hypothetical protein
MT0472	33.1119	35.2758	35.6475	43.6152	1.15955	0.213564	4.99571	0.540613	0.462179	0.907716	Rv0456c	echA2	enoyl-CoA hydratase/isomerase superfamily
MT0472.1	4.5892	3.32659	2.68369	2.16697	0.608764	-0.716045	1.77681	3.96314	0.0465068	0.398202
MT0473	204.829	166.953	215.404	204.798	1.13015	0.176514	7.42059	0.289926	0.590268	0.947849	Rv0457c	Rv0457c	probable peptidase
MT0474	144.473	123.153	77.9283	61.8965	0.522339	-0.936943	6.67569	9.31351	0.0022747	0.0524627
MT0475	19.6348	15.732	9.92459	7.72229	0.497965	-1.00588	3.8338	9.94697	0.00161115	0.0404307	Rv0459	Rv0459	conserved hypothetical protein
MT0476	61.3442	54.473	53.5726	49.2493	0.887586	-0.172042	5.75448	0.34158	0.558919	0.937175
MT0477	168.058	152.746	107.753	109.57	0.677427	-0.561863	7.04966	3.09878	0.0783511	0.526298	Rv0461	Rv0461	unknown possible membrane protein
MT0478	999.865	898.873	833.362	655.961	0.784363	-0.350407	9.56072	0.853964	0.355433	0.869542	Rv0462	Rv0462	probable dihydrolipoamide dehydrogenase
MT0479	25.8506	24.0485	34.4829	23.9155	1.16914	0.225444	4.65115	0.55493	0.45631	0.907454
MT0480	165.908	243.049	236.469	409.005	1.57854	0.658594	7.81987	2.94188	0.0863103	0.547501	Rv0464c	Rv0464c	conserved hypothetical protein
MT0481	200.763	282.067	270.85	471.06	1.53676	0.619887	8.20465	2.74182	0.0977531	0.592758	Rv0465c	Rv0465c	transcriptional regulator (PbsX/Xre family)
MT0482	115.253	153.924	177.225	211.063	1.44272	0.528792	7.22612	2.63367	0.10462	0.617505	Rv0466	Rv0466	conserved hypothetical protein
MT0483	251.128	330.303	1698.52	5037.49	11.5853	3.53423	10.1978	37.4216	9.51621e-10	6.90358e-08	Rv0467	aceA	isocitrate lyase
MT0484	63.4355	94.2535	262.951	612.307	5.55138	2.47285	7.5848	30.3146	3.67356e-08	2.255e-06
MT0486	899.193	1191.41	1135.15	1425.75	1.22498	0.292757	9.97827	0.559524	0.454452	0.907454	Rv0470c	umaA2	unknown mycolic acid methyltransferase
MT0487	3.07883	3.04938	6.3801	5.04313	1.85809	0.893821	2.04471	6.35006	0.0117377	0.168323
MT0488	54.4314	44.2853	62.3832	49.8797	1.13664	0.184777	5.70802	0.356672	0.550361	0.93414	Rv0471c	Rv0471c	hypothetical protein
MT0489	365.219	305.146	365.336	270.083	0.947804	-0.077339	8.15283	0.0498823	0.823268	0.983793	Rv0472c	Rv0472c	transcriptional regulator (TetR/AcrR family)
MT0490	357.609	255.94	280.572	178.795	0.748621	-0.417693	8.0341	1.17886	0.277587	0.819333	Rv0473	Rv0473	possible membrane protein
MT0491	40.141	52.3938	124.817	183.01	3.32789	1.73461	6.30225	28.5912	8.93857e-08	5.02323e-06	Rv0474	Rv0474	transcriptional regulator (PbsX/Xre family)
MT0493	576.496	1019.12	4709.42	10412.2	9.47711	3.24445	11.332	29.961	4.4082e-08	2.62518e-06	Rv0475	Rv0475	possible exported protein
MT0495	184.207	152.954	251.609	203.734	1.35038	0.433371	7.44654	1.45254	0.22812	0.792407	Rv0476	Rv0476	unknownunkown hydrophobic protein
MT0496	39.7343	37.7014	58.0791	41.9604	1.29122	0.368731	5.49345	1.46867	0.225555	0.792407	Rv0478	deoC	deoxyribose-phosphate aldolase
MT0497	718.529	983.424	938.279	1172.53	1.24025	0.310632	9.75778	0.61994	0.43107	0.905045	Rv0479c	Rv0479c	unknown hydrophobic protein
MT0498	97.7093	93.9763	108.917	116.701	1.17703	0.235149	6.85508	0.608373	0.435401	0.905045
MT0499	62.6803	80.8778	60.7628	137.937	1.3846	0.469468	6.55419	1.24777	0.263979	0.809797
MT0500	23.9335	31.3254	30.1282	43.1424	1.32706	0.408234	5.22954	1.31069	0.252269	0.80196	Rv0482	murB	UDP-N-acetylenolpyruvoylglucosamine reductase
MT0501	1341.96	1324.33	1999.65	1847.72	1.44296	0.529032	10.6695	1.69784	0.19257	0.765795	Rv0483	Rv0483	conserved hypothetical protein
MT0502	47.7509	35.0678	54.9903	43.3	1.18586	0.245932	5.70271	0.661533	0.416019	0.899381	Rv0484c	Rv0484c	oxidoreductase
MT0503	1990.84	1290.37	2556.29	1610.92	1.27001	0.344836	10.725	0.508889	0.47562	0.909913	Rv0485	Rv0485	transcriptional regulator (ROK family)
MT0504	331.584	204.516	321.182	181.553	0.93763	-0.0929097	8.09043	0.0530377	0.817859	0.983793	Rv0486	Rv0486	conserved hypothetical protein
MT0505	70.9874	59.047	79.2955	49.4463	0.989512	-0.0152102	5.9142	0.00218179	0.962745	0.993521	Rv0487	Rv0487	conserved hypothetical protein
MT0506	9.75931	9.56396	17.3174	9.02247	1.35988	0.443478	3.39043	1.44811	0.228831	0.792407
MT0507	4.06638	5.1978	6.27882	5.47652	1.27047	0.345366	2.3187	1.26706	0.260319	0.807727	Rv0488	Rv0488	probable membrane protein
MT0508	98.6968	81.0857	112.563	71.707	1.02455	0.0349924	6.37888	0.0119146	0.91308	0.988973	Rv0489	gpm	phosphoglycerate mutase I
MT0509	2183.47	1461.41	1213.53	730.702	0.533406	-0.906695	10.3017	3.86762	0.0492263	0.408343
MT0510	289.178	274.097	256.166	156.573	0.732668	-0.448768	7.81323	1.6035	0.205409	0.772521	Rv0491	regX3	two-component response regulator
MT0511	19.9253	19.0586	17.5199	20.5665	0.977382	-0.0330055	4.49468	0.0121087	0.912378	0.988973	Rv0492c	Rv0492c	gmc-type oxidoreductase
MT0512	5.57675	5.89084	10.9373	11.8198	1.98478	0.988981	3.0358	7.02835	0.00802293	0.129111
MT0513	22.8879	20.7219	26.2293	31.1649	1.31612	0.39629	4.53162	1.57689	0.209209	0.775612	Rv0493c	Rv0493c	conserved hypothetical protein
MT0514	1.39419	1.59399	2.07606	1.26078	1.1048	0.143787	0.998485	0.144036	0.704301	0.968687	Rv0494	Rv0494	transcriptional regulator (GntR family)
MT0515	551.052	293.572	297.94	183.917	0.570438	-0.809857	8.19513	3.7844	0.0517323	0.423007	Rv0495c	Rv0495c	conserved hypothetical protein
MT0516	261.759	232.307	209.024	233.205	0.895085	-0.159903	7.88395	0.237868	0.62575	0.958956	Rv0496	Rv0496	conserved hypothetical protein
MT0517	178.398	184.279	144.514	157.519	0.83283	-0.263906	7.41277	0.704737	0.401197	0.889933	Rv0497	Rv0497	probable membrane protein
MT0518	35.7841	36.1767	37.2172	47.9491	1.184	0.243671	5.37848	0.716738	0.397216	0.889933
MT0519	22.6555	19.4051	21.6721	28.5252	1.19369	0.255423	4.7066	0.723247	0.395081	0.889399	Rv0499	Rv0499	hypothetical protein
MT0520	88.8213	96.194	96.0559	111.54	1.12221	0.166347	6.57895	0.321764	0.570549	0.943349	Rv0500	proC	pyrroline-5-carboxylate reductase
MT0521	80.1658	121.351	112.816	125.251	1.18166	0.240812	6.73334	0.502437	0.478431	0.909913
MT0522	325.02	457.892	478.203	460.776	1.19938	0.262294	8.772	0.553877	0.456738	0.907454	Rv0501	galE1	UDP-glucose 4-epimerase
MT0523	471.584	553.393	475.317	546.509	0.996955	-0.00440005	9.02956	0.000158632	0.989951	0.998284	Rv0502	Rv0502	conserved hypothetical protein
MT0524	676.181	883.072	666.872	1210.19	1.20386	0.267669	9.54598	0.423956	0.51497	0.922431
MT0525	10.4564	8.03927	8.86124	8.62847	0.943855	-0.0833631	3.06122	0.0736951	0.786031	0.983793
MT0526	579.343	520.82	417.592	403.293	0.746141	-0.42248	8.69025	1.54796	0.213437	0.779641	Rv0505c	serB	probable phosphoserine phosphatase
MT0527	120.307	165.914	102.487	145.738	0.867486	-0.205088	6.96131	0.377768	0.5388	0.931102	Rv0506	mmpS2	conserved small membrane protein
MT0528	231.667	282.622	251.558	264.725	1.00393	0.00565859	7.79775	0.000303323	0.986105	0.996343	Rv0507	mmpL2	conserved large membrane protein
MT0529	9.87549	9.49465	12.7096	9.45586	1.14197	0.191524	3.45934	0.395027	0.529669	0.931004
MT0530	431.791	438.487	482.507	422.007	1.03933	0.0556483	8.89961	0.0260311	0.871824	0.987206	Rv0509	hemA	glutamyl-tRNA reductase
MT0531	223.244	265.088	250.242	191.048	0.903648	-0.146167	8.13961	0.162185	0.687153	0.96772	Rv0510	hemC	porphobilinogen deaminase
MT0532	375.733	357.886	450.151	266.183	0.976369	-0.0345016	8.54591	0.00920259	0.923576	0.990937	Rv0511	cysG	uroporphyrin-III c-methyltransferase
MT0533	158.879	155.31	188.466	120.129	0.98203	-0.0261613	7.26264	0.0064797	0.935842	0.991666	Rv0512	hemB	[delta]-aminolevulinic acid dehydratase
MT0534	129.485	155.588	117.222	103.266	0.773459	-0.370603	6.8347	1.46261	0.226515	0.792407	Rv0513	Rv0513	probable membrane protein
MT0535	6.04148	3.95033	5.77247	3.74295	0.945119	-0.0814317	2.65981	0.0502386	0.822649	0.983793	Rv0514	Rv0514	possible membrane protein
MT0536	328.796	308.819	162.338	128.836	0.45665	-1.13084	8.40651	5.73764	0.0166051	0.212521
MT0537	267.8	443.546	517.547	952.127	2.06618	1.04697	9.0294	6.18153	0.012909	0.180095	Rv0516c	Rv0516c	conserved hypothetical protein
MT0538	52.2239	77.2047	71.3457	102.714	1.34555	0.428197	6.20514	1.72831	0.188626	0.763856	Rv0517	Rv0517	possible acyltransferase
MT0539	49.8422	57.1065	38.078	50.2737	0.826603	-0.274734	5.7536	0.8349	0.36086	0.869929	Rv0518	Rv0518	hypothetical protein
MT0540	37.5269	36.939	39.6984	49.6433	1.20012	0.263182	5.41888	0.835568	0.360667	0.869929
MT0541	283.485	207.08	180.111	207.241	0.789588	-0.340828	7.9201	0.967802	0.325229	0.855997	Rv0519c	Rv0519c	conserved hypothetical protein
MT0542	13.4191	14.2766	12.5576	15.3658	1.00934	0.0134156	4.03747	0.00180756	0.966088	0.993521	Rv0520	Rv0520	similar to methyltransferases
MT0543	3.9502	3.3959	2.93687	2.87616	0.78959	-0.340824	1.79152	1.10277	0.293659	0.832566
MT0544	70.5807	65.8388	98.6383	67.176	1.21509	0.28106	6.33291	0.724872	0.39455	0.889399	Rv0522	gabP	probable 4-amino butyrate transporter
MT0545	26.4896	23.6327	21.0644	25.649	0.932256	-0.101203	4.60684	0.117909	0.731314	0.973668	Rv0523c	Rv0523c	conserved hypothetical protein
MT0546	689.774	355.183	474.76	239.667	0.683634	-0.548705	8.63048	1.47136	0.225132	0.792407	Rv0524	hemL	glutamate-1-semialdehyde aminotransferase
MT0547	102.124	69.9971	86.1819	49.9191	0.79024	-0.339637	6.32255	1.02785	0.310665	0.8488
MT0548	165.269	141.38	139.653	106.378	0.802184	-0.317996	6.94052	0.980587	0.322054	0.8543	Rv0526	Rv0526	conserved hypothetical protein
MT0549	63.3774	40.2656	49.3698	31.2043	0.776708	-0.364557	5.56536	1.08946	0.296591	0.832566
MT0550	340.879	205.279	233.177	162.286	0.723984	-0.465971	7.76449	1.49231	0.221858	0.790369	Rv0528	Rv0528	probable membrane protein
MT0551	100.265	77.274	89.372	76.4743	0.933848	-0.0987405	6.39841	0.11013	0.739996	0.973668	Rv0529	ccsB	cytochrome c-type biogenesis protein
MT0552	575.799	473.208	454	493.714	0.903432	-0.146513	9.11716	0.169332	0.680706	0.96772	Rv0530	Rv0530	conserved hypothetical protein
MT0553	76.5641	38.4637	72.6622	43.103	1.00572	0.0082224	5.84613	0.000392767	0.984188	0.995533
MT0554	16.4398	17.8804	21.7733	25.1368	1.36766	0.451707	4.49475	2.19938	0.138066	0.692936	Rv0531	Rv0531	unknown, membrane protein.
MT0556	18.8796	16.4944	15.3932	11.5834	0.761352	-0.393364	4.12484	1.62901	0.201841	0.772521	Rv0532	PE_PGRS	PE_PGRS-family protein
MT0557	187.402	245.059	182.491	276.86	1.06232	0.0872238	7.599	0.0597723	0.806856	0.983793	Rv0533c	fabH	[beta]-ketoacyl-ACP synthase III
MT0558	18.1244	19.7516	18.3808	22.3001	1.07474	0.103987	4.63922	0.0874544	0.767439	0.981048	Rv0534c	menA	4-dihydroxy-2-naphthoate octaprenyltransferase
MT0559	20.3319	19.821	21.0138	22.6153	1.08671	0.119962	4.43191	0.165734	0.683931	0.96772	Rv0535	pnp	phosphorylase from Pnp/MtaP family 2
MT0560	10.6307	7.96996	8.91188	7.99808	0.907148	-0.140591	3.31878	0.174568	0.676084	0.96772	Rv0536	galE2	UDP-glucose 4-epimerase
MT0562	184.497	194.536	289.839	314.604	1.59472	0.673306	7.79177	4.23556	0.0395856	0.364773	Rv0537c	Rv0537c	unknown, possible membrane protein,
MT0563	133.203	119.134	147.755	174.933	1.2788	0.354791	7.06447	1.30357	0.253562	0.802704	Rv0538	Rv0538	possible transmembrane protein
MT0564	13.3029	14.138	23.2418	24.8216	1.75195	0.808962	4.15284	6.78996	0.00916717	0.140681
MT0565	7.26139	5.40571	7.54472	9.29827	1.32792	0.409167	2.80878	1.73218	0.188133	0.763633	Rv0540	Rv0540	conserved hypothetical protein
MT0566	36.4812	28.1374	27.242	25.1368	0.810023	-0.303965	4.99591	1.05422	0.304537	0.845042	Rv0541c	Rv0541c	unknown membrane protein
MT0567	41.7094	35.9688	43.1922	44.482	1.12843	0.174321	5.66361	0.343715	0.557693	0.937175	Rv0542c	menE	o-succinylbenzoic acid-CoA ligase
MT0569	12.6058	16.0785	14.7856	24.0731	1.35739	0.44084	4.34602	1.67514	0.195572	0.769607
MT0570	437.484	542.443	500.838	696.858	1.22228	0.289572	9.23519	0.612722	0.433765	0.905045	Rv0545c	pitA	low-affinity inorganic phosphate transporter
MT0571	68.4894	53.9185	60.5603	66.1516	1.03499	0.0496175	5.84723	0.0274677	0.868366	0.987206	Rv0546c	Rv0546c	conserved hypothetical protein
MT0572	70.5807	60.3638	48.509	48.8947	0.743763	-0.427085	5.91482	2.17922	0.139885	0.69507	Rv0547c	Rv0547c	putative oxidoreductase
MT0573	337.509	241.594	214.898	258.421	0.817319	-0.291029	8.1218	0.737657	0.390413	0.888111
MT0573.1	10.224	8.24718	13.4691	10.362	1.28687	0.363868	3.50672	1.21593	0.270162	0.814796
MT0574	49.726	22.801	40.6098	15.9962	0.779467	-0.359439	5.09907	0.580677	0.446047	0.905045
MT0575	15.7427	9.97978	22.938	8.90427	1.23412	0.303486	3.76455	0.517918	0.471731	0.909913
MT0577	103.693	78.1056	99.7017	70.6826	0.936904	-0.0940269	6.30196	0.071913	0.788572	0.983793	Rv0551c	fadD8	acyl-CoA synthase
MT0578	76.7384	48.2356	51.0408	46.8459	0.782918	-0.353067	6.08372	1.08355	0.297904	0.834716	Rv0552	Rv0552	putative transcriptional regulator
MT0579	11.2116	7.69275	10.836	8.98307	1.04508	0.0636081	3.65754	0.0377274	0.845992	0.983793
MT0580	87.0786	107.906	85.2199	112.131	1.01245	0.0178469	6.55019	0.003432	0.953284	0.993521
MT0581	120.132	105.55	98.2332	96.568	0.863102	-0.212397	6.90375	0.477722	0.489456	0.913438	Rv0555	menD	2-succinyl-6-hydroxy-2,4-cyclohexadiene-1-carbox ylate
MT0582	46.9376	61.3341	38.9895	52.9922	0.850164	-0.234187	5.73135	0.575724	0.447993	0.905977	Rv0556	Rv0556	possible membrane protein
MT0583	61.0538	99.2434	63.8516	91.7219	0.971061	-0.0423668	6.38466	0.0158096	0.899941	0.987206	Rv0557	Rv0557	conserved hypothetical protein
MT0584	221.385	128.836	153.477	93.2978	0.704454	-0.505423	7.07696	1.60338	0.205425	0.772521
MT0585	588.696	468.079	1688.95	1718.21	3.22403	1.68886	9.59504	19.9859	7.80163e-06	0.000338353	Rv0559c	Rv0559c	possible exported
MT0586	63.2032	65.2844	3441.4	3913.55	57.2383	5.83891	9.93064	156.224	7.56416e-36	1.00603e-32	Rv0560c	Rv0560c	methyl transferase
MT0587	59.95	39.0182	49.7242	34.6715	0.851985	-0.231101	5.44179	0.498066	0.480351	0.909913	Rv0561c	Rv0561c	similar to squalene monooxygenase
MT0588	170.381	160.37	189.783	183.365	1.12814	0.173948	7.43829	0.306283	0.57997	0.944797	Rv0562	grcC1	heptaprenyl diphosphate synthase II
MT0589	216.506	371.47	253.989	274.929	0.899644	-0.152574	8.02294	0.177727	0.673334	0.96772	Rv0563	htpX	probable (transmembrane) heat shock protein
MT0590	66.9791	83.7886	66.6872	92.2735	1.0548	0.0769762	6.15209	0.0641449	0.800061	0.983793	Rv0564c	gpdA1	glycerol-3-phosphate dehydrogenase
MT0591	120.191	152.954	122.538	167.763	1.06302	0.0881672	7.03894	0.0674977	0.795016	0.983793	Rv0565c	Rv0565c	Probable monooxygenasemonoxygenase
MT0592	24.0497	32.0878	30.1789	36.9173	1.19615	0.258394	4.83337	0.578942	0.446727	0.905045	Rv0566c	Rv0566c	conserved hypothetical protein
MT0593	299.169	499.821	288.826	419.998	0.887231	-0.172619	8.48091	0.197627	0.656643	0.96772	Rv0567	Rv0567	Probable methyltransferase
MT0594	700.579	468.218	524.839	403.253	0.794021	-0.33275	9.05678	0.733116	0.391875	0.889399	Rv0568	Rv0568	similar too MTCY63.32c cytochrome P-450
MT0595	194.605	175.963	36.002	19.5027	0.149676	-2.74008	6.50854	46.8265	7.75581e-12	6.18913e-10	Rv0569	Rv0569	conserved hypothetical protein
MT0596	1404.41	1164.1	50.18	55.8684	0.041295	-4.59789	9.16025	86.5529	1.3605e-20	3.19318e-18	Rv0570	nrdZ	ribonucleotide reductase, class II
MT0597	384.157	353.728	37.6223	36.6415	0.100655	-3.31251	7.62784	68.7114	1.1398e-16	1.33759e-14	Rv0571c	Rv0571c	conserved hypothetical protein
MT0598	406.057	521.998	24.6596	38.4932	0.0681041	-3.87611	7.99704	91.2152	1.28864e-21	3.51398e-19
MT0599	486.629	612.37	19.4441	31.2437	0.0461714	-4.43686	8.01877	116.363	3.9587e-27	3.15904e-24	Rv0572c	Rv0572c	hypothetical protein
MT0600	1141.78	1366.54	3.49386	8.35268	0.0047463	-7.71898	9.0721	172.303	2.32402e-39	9.27284e-36
MT0601	131.751	103.471	11.7475	14.9324	0.113559	-3.13848	5.75679	73.9007	8.21473e-18	1.13023e-15	Rv0573c	Rv0573c	conserved hypothetical protein
MT0602	278.489	249.079	14.5831	16.7842	0.0594956	-4.07107	6.78601	77.296	1.47161e-18	2.44656e-16	Rv0574c	Rv0574c	conserved hypothetical protein
MT0604	47.6928	23.8406	14.178	5.08253	0.268747	-1.89568	4.31683	11.6745	0.000633623	0.0180583	Rv0575c	Rv0575c	possible oxidoreductase
MT0605	224.638	187.606	187.757	162.326	0.84914	-0.235925	7.53944	0.499976	0.479511	0.909913	Rv0576	Rv0576	putative transcriptional regulator
MT0606	216.273	249.495	209.024	209.526	0.898658	-0.154156	7.62613	0.223722	0.636218	0.960875	Rv0577	Rv0577	conserved hypothetical protein
MT0607	422.671	414.369	302.852	303.297	0.72416	-0.465619	8.44098	1.85907	0.172732	0.740553	Rv0578c	PE_PGRS	PE_PGRS-family protein
MT0608	7.02903	11.7817	10.1271	13.1988	1.24437	0.315413	3.60697	0.813681	0.367034	0.877317
MT0608.1	103.344	62.0271	79.8525	60.0447	0.845523	-0.242084	6.21672	0.525099	0.468675	0.909913	Rv0579	Rv0579	conserved hypothetical protein
MT0609	86.4396	71.7297	100.259	89.8307	1.20154	0.264884	6.24424	0.726731	0.393945	0.889399	Rv0580c	Rv0580c	hypothetical protein
MT0610	8.24894	12.3361	7.13963	12.3714	0.9517	-0.0714219	3.64749	0.0378155	0.845814	0.983793
MT0611	100.846	168.478	71.4469	118.435	0.705291	-0.503709	6.96365	1.69894	0.192427	0.765795	Rv0583c	lpqN	equivalent to MKU20446_1 MK35
MT0612	39.4439	34.2362	26.6344	29.8254	0.766331	-0.383961	5.41919	1.61278	0.204102	0.772521	Rv0584	Rv0584	hypothetical protein
MT0613	25.8506	37.6321	29.47	37.7053	1.05935	0.0831758	5.17146	0.0703511	0.790826	0.983793	Rv0585c	Rv0585c	possible membrane protein
MT0614	2.84647	4.85128	3.24068	5.00373	1.08228	0.114075	2.25199	0.0993844	0.75257	0.977278
MT0615	148.132	161.27	114.285	155.588	0.872388	-0.196958	7.29803	0.389397	0.532616	0.931102	Rv0586	Rv0586	transcriptional regulator (GntR family)
MT0616	173.983	149.558	180.972	138.844	0.988362	-0.0168889	7.4169	0.00236914	0.961179	0.993521	Rv0587	Rv0587	part of mce2 operon
MT0617	158.415	188.784	171.959	170.56	0.986571	-0.0195058	7.51621	0.00336694	0.953728	0.993521	Rv0588	Rv0588	part of mce2 operon
MT0618	128.672	136.875	127.501	125.093	0.951238	-0.0721215	7.13336	0.0486474	0.825434	0.983793	Rv0589	mce2	cell invasion protein
MT0619	121.991	122.46	129.121	139.71	1.09977	0.137197	7.08647	0.182287	0.669415	0.96772	Rv0590	Rv0590	part of mce2 operon
MT0620	2.49792	4.85128	5.62056	5.75232	1.55924	0.64084	2.43081	3.43606	0.0637875	0.466995
MT0621	17.7759	18.4349	12.7602	13.8686	0.735708	-0.442794	4.32299	1.2943	0.255257	0.804105	Rv0591	Rv0591	part of mce2 operon
MT0622	17.6597	20.6526	14.5324	15.3264	0.779776	-0.358868	4.32065	0.849265	0.35676	0.869542	Rv0592	Rv0592	part of mce2 operon
MT0623	15.6265	16.8409	12.1526	14.105	0.809369	-0.30513	4.0543	0.692086	0.405456	0.893301	Rv0593	lprL	part of mce2 operon
MT0624	41.0704	41.3052	36.6602	38.4538	0.911945	-0.132982	5.38612	0.195755	0.658169	0.96772	Rv0594	Rv0594	part of mce2 operon
MT0625	32.2987	36.6618	39.192	32.8197	1.04415	0.0623254	5.10926	0.0439765	0.833897	0.983793	Rv0595c	Rv0595c	conserved hypothetical protein
MT0626	18.8215	31.3947	19.3935	21.1181	0.807807	-0.307917	4.36448	0.847972	0.357127	0.869542
MT0627	183.684	142.697	176.364	142.547	0.977003	-0.0335652	7.31024	0.00762272	0.930427	0.990937	Rv0597c	Rv0597c	conserved hypothetical protein
MT0628	202.796	148.241	154.641	114.337	0.766094	-0.384408	7.14029	1.26324	0.261039	0.808027	Rv0598c	Rv0598c	conserved hypothetical protein
MT0629	35.668	22.8703	25.1659	15.7204	0.697159	-0.520441	4.57727	2.39427	0.12178	0.661093	Rv0599c	Rv0599c	conserved hypothetical protein
MT0630	6.97094	6.65319	5.72183	6.9343	0.930288	-0.104251	2.67634	0.105634	0.74517	0.973668	Rv0601c	Rv0601c	sensor histidine kinase
MT0631	2.6141	2.84147	4.00022	2.52156	1.18819	0.248768	1.75959	0.49018	0.483847	0.909913	Rv0602c	tcrA	two-component response regulator
MT0632	76.0413	84.9667	80.8145	96.371	1.1007	0.138415	6.361	0.20088	0.654011	0.96772	Rv0604	lpqO	lipoprotein
MT0633	26.1991	27.9295	46.1797	25.058	1.31522	0.395304	4.8614	1.10929	0.292236	0.832566	Rv0605	Rv0605	resolvase
MT0635	71.9749	52.3938	96.9673	54.1348	1.21422	0.280035	6.00536	0.620253	0.430953	0.905045	Rv0606	Rv0606	transposase
MT0636	9.93358	8.17788	12.9121	8.47088	1.17645	0.234437	3.38358	0.533075	0.465317	0.909913	Rv0607	Rv0607	hypothetical protein
MT0637	95.8504	89.8873	80.4601	56.9716	0.73967	-0.435046	6.19951	2.0807	0.149172	0.70941	Rv0608	Rv0608	conserved hypothetical protein
MT0638	98.8711	81.8481	95.9546	57.996	0.851481	-0.231953	6.32113	0.516063	0.472526	0.909913	Rv0609	Rv0609	conserved hypothetical protein
MT0638.1	83.6512	72.9771	97.4231	50.7465	0.945496	-0.080857	6.19214	0.0579112	0.809828	0.983793
MT0639	3.89211	4.36615	7.03836	5.83112	1.55692	0.63869	2.59459	4.21942	0.0399638	0.366311
MT0640	21.5518	25.6425	20.9632	28.2494	1.04385	0.0619083	4.84063	0.0354034	0.850753	0.983793	Rv0610c	Rv0610c	possible monooxygenase
MT0641	41.7675	53.9878	41.0149	71.3524	1.17429	0.231784	5.76847	0.43215	0.510936	0.922431	Rv0611c	Rv0611c	hypothetical protein
MT0642	18.473	19.1279	19.4947	16.3114	0.951759	-0.0713318	4.41707	0.0583508	0.809122	0.983793	Rv0612	Rv0612	hypothetical protein
MT0643	480.878	371.955	311.815	339.741	0.76398	-0.388392	8.63707	1.27951	0.257989	0.807559	Rv0613c	Rv0613c	hypothetical protein
MT0644	9.46885	10.3956	8.10171	11.2682	0.977703	-0.0325322	3.34725	0.011032	0.916349	0.988973	Rv0614	Rv0614	conserved hypothetical protein
MT0645	71.1035	38.6023	46.0278	21.4727	0.61468	-0.702091	5.69113	2.72651	0.0986949	0.594853	Rv0615	Rv0615	possible membrane protein
MT0645.1	2.49792	1.45538	2.07606	1.89117	0.990688	-0.0134967	1.1328	0.00138392	0.970325	0.993521	Rv0616c	Rv0616c	hypothetical protein
MT0645.2	44.8464	55.5818	52.1548	40.8572	0.926103	-0.110756	5.54657	0.135241	0.713059	0.970694
MT0646	60.2986	47.5426	66.0796	38.178	0.965985	-0.0499275	5.76285	0.023733	0.877566	0.987206	Rv0617	Rv0617	conserved hypothetical protein
MT0649	44.2654	23.0782	48.2052	21.1575	1.02877	0.0409194	4.96719	0.00815414	0.928049	0.990937	Rv0621	Rv0621	membrane spanning ATP/GTP-binding protein
MT0650	40.141	22.3159	34.9893	17.6903	0.842416	-0.247395	4.90588	0.30762	0.579145	0.944335	Rv0622	Rv0622	potential membrane spanning protein
MT0651	9.52695	3.88103	10.5829	4.13694	1.09026	0.124672	3.15836	0.0747314	0.784568	0.983793
MT0652	57.2779	38.0479	41.7744	21.7485	0.66552	-0.587447	5.39101	2.80317	0.0940781	0.577495
MT0653	17.4273	17.1874	20.71	17.8873	1.11442	0.156287	4.44646	0.264318	0.607169	0.953211	Rv0625c	Rv0625c	probable integral membrane protein
MT0654	23.4107	24.9495	32.9638	32.3075	1.34973	0.432672	5.15212	1.53594	0.215223	0.782807	Rv0626	Rv0626	conserved hypothetical protein
MT0655	9.29458	6.09875	9.3676	4.21574	0.877142	-0.189118	2.94791	0.224386	0.635718	0.960801
MT0656	148.307	70.205	94.3849	43.497	0.630662	-0.665061	6.52286	2.50853	0.113232	0.639935	Rv0628c	Rv0628c	conserved hypothetical protein
MT0657	31.6016	15.732	20.0011	13.4746	0.706056	-0.502146	4.78648	1.47449	0.224638	0.792407	Rv0629c	recD	exodeoxyribonuclease V
MT0658	35.7841	22.5931	25.571	20.4483	0.787286	-0.345041	5.0195	1.09892	0.294504	0.832566	Rv0630c	recB	exodeoxyribonuclease V
MT0659	44.2654	31.5333	35.1918	28.9586	0.845534	-0.242066	5.42632	0.649101	0.420434	0.902787	Rv0631c	recC	exodeoxyribonuclease V
MT0660	1061.56	733.583	804.145	746.737	0.863917	-0.211035	9.41798	0.303957	0.581412	0.946099	Rv0632c	echA3	enoyl-CoA hydratase/isomerase superfamily
MT0661	151.385	115.391	167.503	128.797	1.11044	0.151134	7.04915	0.202378	0.652809	0.96772	Rv0633c	Rv0633c	hypothetical protein
MT0662	343.028	264.811	311.207	220.006	0.873858	-0.19453	7.9688	0.286148	0.5927	0.947849	Rv0634c	Rv0634c	putative glyoxylase II
MT0662.1	148.829	196.962	192.871	174.185	1.06156	0.0861834	7.29494	0.0739088	0.785728	0.983793
MT0663	315.319	554.917	300.624	459.634	0.873688	-0.19481	8.66566	0.200047	0.654683	0.96772
MT0664	385.783	779.116	488.989	830.107	1.13243	0.179424	9.18708	0.160888	0.68834	0.96772	Rv0635	Rv0635	conserved hypothetical protein
MT0665	197.858	312.423	242.798	362.238	1.18584	0.245907	8.10757	0.427591	0.513173	0.922431	Rv0636	Rv0636	hypothetical protein
MT0666	379.8	612.925	522.51	789.249	1.32144	0.402111	9.12665	0.954625	0.328545	0.859456	Rv0637	Rv0637	conserved hypothetical protein
MT0667	194.489	335.778	174.592	196.721	0.700319	-0.513915	7.85434	1.80705	0.178862	0.747288	Rv0638	secE	SecE preprotein translocase
MT0668	1002.01	1404.45	1026.39	1101.17	0.884116	-0.177693	10.0148	0.205631	0.650213	0.96772	Rv0639	nusG	transcription antitermination protein
MT0669	567.318	944.06	602.008	795.159	0.924468	-0.113304	9.30192	0.0786479	0.779138	0.983793	Rv0640	rplK	50S ribosomal protein L11
MT0669.1	923.939	1513.88	993.827	1287.81	0.935954	-0.0954911	10.0357	0.0508663	0.821563	0.983793	Rv0641	rplA	50S ribosomal protein L1
MT0670	1129.41	1472.02	1182.85	1662.89	1.09393	0.129523	10.3606	0.0963625	0.756239	0.977484	Rv0642c	mmaA4	methoxymycolic acid synthase 4
MT0671	229.402	401.825	276.724	457.94	1.16399	0.219079	8.34572	0.291491	0.589266	0.947849	Rv0643c	mmaA3	methoxymycolic acid synthase 3
MT0672	208.315	370.777	260.571	304.085	0.97517	-0.0362738	8.13739	0.00907533	0.924105	0.990937	Rv0644c	mmaA2	methoxymycolic acid synthase 2
MT0673	166.431	189.061	171.199	139.829	0.874896	-0.192817	7.0018	0.366282	0.545038	0.931102	Rv0645c	mmaA1	methoxymycolic acid synthase 1
MT0674	85.0454	108.946	151.806	204.877	1.83897	0.8789	6.93809	6.2903	0.01214	0.172996	Rv0646c	lipG	probable hydrolase
MT0675	136.34	164.251	254.748	280.248	1.77994	0.831826	7.52021	6.21471	0.0126693	0.178624	Rv0647c	Rv0647c	conserved hypothetical protein
MT0676	116.996	67.71	122.994	95.5042	1.18254	0.241886	6.66237	0.42404	0.514928	0.922431	Rv0648	Rv0648	conserved hypothetical protein
MT0677	3.60165	1.8019	2.48115	1.26078	0.677904	-0.560848	1.42489	2.02577	0.154651	0.720585
MT0679	4.35683	2.49495	4.91166	3.58535	1.22724	0.295415	1.96625	0.670787	0.412777	0.899007
MT0680	298.588	378.469	176.415	223.592	0.590863	-0.759105	8.17729	4.76078	0.0291153	0.312285	Rv0651	rplJ	50S ribosomal protein L10
MT0681	43.6264	80.8778	46.7367	53.9772	0.809282	-0.305285	6.10149	0.543034	0.461178	0.907716	Rv0652	rplL	50S ribosomal protein L7/L12
MT0682	21.3194	14.2073	26.9888	17.5721	1.25143	0.323583	4.26207	0.95555	0.328311	0.859456	Rv0653c	Rv0653c	putative transcriptional regulator
MT0683	191.352	141.034	315.764	190.457	1.52272	0.606647	7.34001	2.78512	0.0951434	0.579646	Rv0654	Rv0654	putative dioxygenase
MT0684	1158.1	1334.52	682.974	672.863	0.543944	-0.878469	9.81971	5.3507	0.020714	0.248179	Rv0655	Rv0655	ABC transporter
MT0685	9.52695	12.7519	12.9627	13.12	1.17249	0.229575	3.59571	0.53983	0.462503	0.907716	Rv0656c	Rv0656c	similar to beta dioxygenases
MT0686	16.7302	21.9694	20.9632	25.7278	1.20817	0.272819	4.37013	0.807894	0.368744	0.878511	Rv0657c	Rv0657c	conserved hypothetical protein
MT0687	24.2821	18.7814	25.6723	16.0356	0.967092	-0.0482744	4.51285	0.0173768	0.895126	0.987206	Rv0658c	Rv0658c	probable membrane protein
MT0688	243.402	174.369	256.014	136.834	0.940171	-0.0890056	7.7707	0.0540405	0.816176	0.983793	Rv0659c	Rv0659c	conserved hypothetical protein
MT0689	381.31	139.44	204.163	113.273	0.60946	-0.714396	8.01936	2.46546	0.116374	0.648508	Rv0660c	Rv0660c	conserved hypothetical protein
MT0690	10.1079	4.85128	7.59535	4.45214	0.800503	-0.321022	2.81559	0.612233	0.433948	0.905045	Rv0661c	Rv0661c	conserved hypothetical protein
MT0691	6.27384	2.56425	5.62056	3.19135	0.987236	-0.0185326	2.54174	0.00187273	0.965482	0.993521	Rv0662c	Rv0662c	hypothetical protein
MT0692	306.14	392.885	350.753	409.242	1.08728	0.120724	8.59965	0.123564	0.725201	0.973273	Rv0663	atsD	proable arylsulfatase
MT0692.1	4.47302	6.9304	7.13963	8.62847	1.38883	0.473872	3.10872	1.84773	0.174047	0.741933	Rv0664	Rv0664	hypothetical protein
MT0693	4.53111	8.5937	7.64599	9.29827	1.29692	0.375088	3.07199	0.996701	0.31811	0.853585	Rv0665	Rv0665	conserved hypothetical protein
MT0694	2.26555	5.40571	5.41802	7.60409	1.71417	0.777512	2.4417	4.19317	0.0405871	0.368889
MT0695	2679.05	6137.57	2378.26	4379.29	0.766461	-0.383716	12.1031	0.464166	0.495683	0.917762	Rv0667	rpoB	[beta] subunit of RNA polymerase
MT0696	1675.52	3187.92	1393.85	2281.94	0.755809	-0.403906	11.2043	0.654226	0.418606	0.90103	Rv0668	rpoC	[beta]' subunit of RNA polymerase
MT0697	86.3815	69.9278	67.0416	78.2473	0.929472	-0.105517	6.19946	0.112165	0.737692	0.973668
MT0699	1136.32	477.089	735.433	256.687	0.61489	-0.7016	9.18102	1.57984	0.208784	0.775612	Rv0670	end	endonuclease IV (apurinase)
MT0700	243.169	179.29	257.179	125.33	0.905291	-0.143547	7.65012	0.111835	0.738064	0.973668	Rv0671	lpqP	probable esterase
MT0701	239.219	218.377	651.631	632.558	2.80626	1.48865	8.39209	19.7327	8.90639e-06	0.000367113	Rv0672	fadE8	acyl-CoA dehydrogenase (aka aidB)
MT0702	50.8297	34.2362	106.943	82.6206	2.22688	1.15502	5.81944	11.6325	0.000648088	0.0182104	Rv0673	echA4	enoyl-CoA hydratase/isomerase superfamily
MT0703	37.0621	25.4346	75.4978	56.4594	2.10961	1.07698	5.47398	9.09931	0.00255706	0.0569982	Rv0674	Rv0674	hypothetical protein
MT0704	32.1244	26.9593	72.6116	60.0841	2.24433	1.16628	5.46966	15.1969	9.686e-05	0.0033901	Rv0675	echA5	enoyl-CoA hydratase/isomerase superfamily
MT0705	678.563	667.536	440.227	520.033	0.713377	-0.487264	9.79639	1.63213	0.201408	0.772521	Rv0676c	mmpL5	conserved large membrane protein
MT0706	365.684	311.937	163.503	200.582	0.537322	-0.896141	8.56217	5.75875	0.0164068	0.211171	Rv0677c	mmpS5	conserved small membrane protein
MT0706.1	242.066	172.567	116.715	95.2284	0.511104	-0.96831	8.0066	6.11807	0.0133807	0.184737	Rv0678	Rv0678	hypothetical protein
MT0707	42.7551	65.5616	49.3192	76.2773	1.16026	0.214451	5.81382	0.348643	0.554882	0.93654
MT0708	40.1991	37.9093	57.7753	42.2362	1.27978	0.355894	5.49276	1.29992	0.254228	0.803143
MT0709	92.2487	109.639	102.588	107.442	1.04047	0.0572415	6.71979	0.0365955	0.848291	0.983793	Rv0681	Rv0681	transcriptional regulator (TetR/AcrR family)
MT0710	188.39	397.112	177.377	231.078	0.697717	-0.519286	8.04986	1.69688	0.192696	0.765795	Rv0682	rpsL	30S ribosomal protein S12
MT0711	277.443	576.194	328.727	493.872	0.963716	-0.0533208	8.86418	0.0144959	0.904167	0.988391	Rv0683	rpsG	30S ribosomal protein S7
MT0712	1022	1755.54	989.522	1492.61	0.893661	-0.1622	10.446	0.118915	0.730215	0.973668	Rv0684	fusA	elongation factor G
MT0713	1362	2507.35	1233.94	2204.6	0.888672	-0.170278	10.8481	0.111091	0.738906	0.973668	Rv0685	tuf	elongation factor EF-Tu
MT0714	139.128	146.37	137.527	115.322	0.885591	-0.175287	7.15585	0.304026	0.58137	0.946099	Rv0686	Rv0686	potential membrane protein
MT0715	87.0786	69.9278	73.6243	46.9641	0.767677	-0.381428	6.26482	1.2424	0.26501	0.80981	Rv0687	Rv0687	putative dehydrogenase, SDR family
MT0716	279.999	295.651	194.188	241.4	0.756743	-0.402125	7.9948	1.49919	0.220796	0.790151	Rv0688	Rv0688	putative oxidoreductase
MT0718	114.904	134.796	138.387	202.04	1.36355	0.447364	7.53964	1.59603	0.206467	0.772931	Rv0690c	Rv0690c	hypothetical protein
MT0719	71.1035	91.8278	105.93	140.617	1.51359	0.59797	6.85819	3.21644	0.0729022	0.505712	Rv0691c	Rv0691c	transcriptional regulator (TetR/AcrR family)
MT0719.1	29.7427	43.6615	104.613	107.836	2.89547	1.5338	6.08946	19.7109	9.00849e-06	0.000367113
MT0719.2	143.834	267.86	540.08	938.731	3.59234	1.84492	8.47043	16.6939	4.39215e-05	0.00166902	Rv0692	Rv0692	hypothetical protein
MT0720	260.481	322.056	577.247	950.275	2.62231	1.39084	8.68468	13.2918	0.000266573	0.00871825	Rv0693	pqqE	coenzyme pqq synthesis protein E
MT0721	189.203	196.546	413.643	556.359	2.51465	1.33036	8.10914	14.7755	0.0001211	0.00416543	Rv0694	lldD1	L-lactate dehydrogenase (cytochrome)
MT0722	104.448	105.065	160.566	184.705	1.64802	0.720732	6.96932	5.45172	0.0195491	0.239266	Rv0695	Rv0695	conserved hypothetical protein
MT0723	70.4065	79.0066	64.8137	86.4817	1.01295	0.0185611	6.13315	0.00383649	0.950611	0.993521	Rv0696	Rv0696	glycosyltransferase
MT0724	10.9792	12.7519	10.7854	16.6266	1.15796	0.211589	3.63633	0.443175	0.505594	0.922431	Rv0697	Rv0697	gmc-type oxidoreductase
MT0725	5.75102	3.32659	5.01293	5.00373	1.09808	0.134989	2.66278	0.132011	0.716356	0.971822
MT0726	1.56846	2.70286	2.53178	3.50655	1.43046	0.516475	2.00423	1.67991	0.194936	0.769607
MT0726.1	1.68464	2.42564	3.44323	3.42775	1.67831	0.747012	1.61311	3.15262	0.0758051	0.514523
MT0727	452.762	1186.9	642.769	1024.54	1.0169	0.0241794	9.63114	0.00231925	0.96159	0.993521	Rv0700	rpsJ	30S ribosomal protein S10
MT0728	399.435	979.89	487.166	879.71	0.991023	-0.0130101	9.50589	0.000670359	0.979344	0.994802	Rv0701	rplC	50S ribosomal protein L3
MT0729	278.198	396.766	266.242	387.809	0.969077	-0.0453166	8.67708	0.0100776	0.920037	0.990937	Rv0702	rplD	50S ribosomal protein L4
MT0730	151.56	386.717	157.021	295.496	0.840796	-0.250172	7.92019	0.244926	0.620671	0.958306	Rv0703	rplW	50S ribosomal protein L23
MT0731	454.215	887.923	492.483	799.651	0.962783	-0.0547178	9.41647	0.0124429	0.911182	0.988973	Rv0704	rplB	50S ribosomal protein L2
MT0732	268.032	640.369	257.685	542.254	0.880668	-0.183331	8.67084	0.11869	0.73046	0.973668
MT0733	98.6387	154.687	93.7773	154.603	0.980697	-0.0281212	7.08157	0.00398946	0.949637	0.993521
MT0734	374.049	819.659	393.085	733.145	0.943526	-0.083866	9.06339	0.0294331	0.863783	0.986569	Rv0707	rpsC	30S ribosomal protein S3
MT0735	132.099	273.404	135.197	235.096	0.91334	-0.130776	7.42537	0.0847468	0.770965	0.982732	Rv0708	rplP	50S ribosomal protein L16
MT0736	176.016	436.754	167.402	410.069	0.942509	-0.0854223	8.07578	0.02647	0.870758	0.987206	Rv0709	rpmC	50S ribosomal protein L29
MT0737	223.07	516.246	225.531	421.298	0.874989	-0.192663	8.35965	0.152018	0.696614	0.96772	Rv0710	rpsQ	30S ribosomal protein S17
MT0738	123.502	208.882	331.613	590.558	2.7747	1.47233	8.17416	10.4823	0.00120523	0.0320592
MT0739	209.419	97.9266	122.386	94.007	0.703912	-0.506534	7.04514	1.50789	0.219461	0.789959	Rv0712	Rv0712	conserved hypothetical protein
MT0740	142.962	158.152	155.654	204.089	1.19485	0.256832	7.28809	0.667434	0.413948	0.899192	Rv0713	Rv0713	potential membrane protein
MT0741	254.265	567.6	279.661	447.617	0.884998	-0.176254	8.5571	0.163143	0.686279	0.96772
MT0741.1	200.298	470.99	255.66	448.917	1.0497	0.0699757	8.36625	0.0224619	0.880865	0.987206	Rv0715	rplX	50S ribosomal protein L24
MT0742	235.85	523.245	304.979	508.134	1.07126	0.099303	8.55626	0.0470962	0.828195	0.983793	Rv0716	rplE	50S ribosomal protein L5
MT0742.1	178.805	467.802	221.683	435.482	1.01644	0.0235231	8.26075	0.00216844	0.962859	0.993521	Rv0717	rpsN	30S ribosomal protein S14
MT0743	225.336	536.76	353.336	605.175	1.25782	0.330926	8.71562	0.430081	0.511949	0.922431	Rv0718	rpsH	30S ribosomal protein S8
MT0744	275.991	449.852	316.372	521.845	1.15491	0.207783	8.54406	0.247147	0.619091	0.958306	Rv0719	rplF	50S ribosomal protein L6
MT0745	103.809	183.309	102.588	181.513	0.989678	-0.0149695	7.30495	0.000922834	0.975765	0.993521	Rv0720	rplR	50S ribosomal protein L18
MT0746	313.111	380.063	319.055	441.431	1.09717	0.133782	8.55248	0.120387	0.728615	0.973668	Rv0721	rpsE	30S ribosomal protein S5
MT0747	83.0703	167.716	104.411	190.536	1.1764	0.234377	7.02287	0.273516	0.600983	0.95053	Rv0722	rpmD	50S ribosomal protein L30
MT0748	355.285	541.195	396.477	585.988	1.09599	0.132229	8.78286	0.118035	0.731175	0.973668	Rv0723	rplO	50S ribosomal protein L15
MT0749	1196.85	715.218	955.698	577.556	0.801854	-0.318589	9.83026	0.551052	0.457888	0.907454	Rv0724	sppA	protease IV, signal peptide peptidase
MT0751	137.792	222.605	322.195	394.112	1.98779	0.991163	7.9047	7.02789	0.00802497	0.129111	Rv0726c	Rv0726c	conserved hypothetical protein
MT0752	7.66803	6.51458	7.19027	9.88926	1.20525	0.269328	2.83816	0.734982	0.391273	0.888549	Rv0727c	fucA	L-fuculose phosphate aldolase
MT0753	8.5394	5.89084	9.26633	9.21947	1.27723	0.353021	2.95662	1.21425	0.270492	0.814796	Rv0728c	Rv0728c	similar to D-3-phosphoglycerate dehydrogenases
MT0754	32.7053	24.8801	25.4697	25.5308	0.885153	-0.176001	4.93682	0.336927	0.561608	0.939153	Rv0729	xylB	xylulose kinase
MT0755	195.999	137.083	192.618	172.176	1.09503	0.130976	7.29874	0.163044	0.68637	0.96772	Rv0730	Rv0730	conserved hypothetical protein
MT0756	30.9045	34.9985	34.5335	44.482	1.19961	0.262568	5.20673	0.660966	0.416219	0.899381	Rv0731c	Rv0731c	conserved hypothetical protein
MT0756.1	778.828	1345.54	902.429	1412.23	1.08961	0.123807	10.0779	0.0788886	0.778809	0.983793	Rv0732	secY	SecY subunit of preprotein translocase
MT0757	201.518	311.799	255.153	368.109	1.21433	0.280161	8.09872	0.583292	0.445025	0.905045	Rv0733	adk	probable adenylate kinase
MT0758	84.3483	86.2835	90.7898	130.491	1.29706	0.375245	6.6655	1.31616	0.251282	0.8019	Rv0734	map'	probable methionine aminopeptidase
MT0759	26.0248	25.0188	26.3812	40.6602	1.31421	0.394199	4.81393	1.55854	0.211879	0.778905	Rv0735	sigL	sigma-70 factors ECF subfamily
MT0760	8.36512	11.9203	22.381	18.1631	2.00032	1.00023	3.87791	8.32751	0.00390491	0.0790892	Rv0736	Rv0736	hypothetical protein
MT0762	15.7427	16.1478	18.5833	18.1237	1.15099	0.202872	4.03699	0.47884	0.488948	0.913438	Rv0737	Rv0737	putative transcriptional regulator
MT0763	35.4356	25.7811	29.47	22.8911	0.854303	-0.227181	4.83485	0.553549	0.456871	0.907454	Rv0738	Rv0738	possible membrane protein
MT0764	21.1452	22.8703	17.8238	27.3038	1.0265	0.0377325	4.55211	0.0132425	0.908385	0.988973	Rv0739	Rv0739	conserved hypothetical protein
MT0765	39.9667	59.3936	37.3185	68.0034	1.06098	0.0854022	5.56676	0.0615853	0.804008	0.983793	Rv0740	Rv0740	conserved hypothetical protein
MT0766	312.879	394.271	281.585	278.121	0.791521	-0.3373	8.31234	0.888324	0.345932	0.869542
MT0767	53.7924	61.2648	61.7755	67.964	1.12789	0.173628	5.80129	0.363406	0.54662	0.93137	Rv0741	Rv0741	truncated copy of IS1557
MT0768	3.83401	3.60381	5.31675	6.9737	1.65365	0.725655	2.5825	3.94427	0.0470313	0.398418	Rv0742	PE_PGRS	PE_PGRS-family protein
MT0768.1	2.26555	2.35634	2.73433	2.00937	1.02028	0.0289649	1.16918	0.00682753	0.934147	0.991431
MT0769	24.4564	26.1969	26.0774	32.7803	1.16276	0.217556	4.59314	0.55016	0.458252	0.907454	Rv0743c	Rv0743c	hypothetical protein
MT0770	20.8547	21.0684	23.343	23.2063	1.11033	0.150991	4.43776	0.240409	0.623911	0.958352	Rv0744c	Rv0744c	putative transcriptional regulator
MT0772.1	24.5725	20.7219	22.9886	14.2232	0.820065	-0.286189	4.64008	0.795543	0.372429	0.878511
MT0772.5	116.415	86.838	65.877	46.0185	0.550274	-0.861777	6.32189	6.8719	0.00875614	0.135942
MT0772.6	13.7095	10.4649	14.3805	12.332	1.1034	0.141951	4.39033	0.144142	0.704198	0.968687	Rv0747	PE_PGRS	PE_PGRS-family protein
MT0773	42.058	44.6318	55.8512	56.5776	1.29698	0.375156	5.68103	1.32262	0.250122	0.800953	Rv0749	Rv0749	conserved hypothetical protein
MT0773.1	28.9875	23.3555	20.9632	26.2794	0.902647	-0.147767	4.51078	0.190158	0.662785	0.96772
MT0774	961.35	1090.98	876.605	825.142	0.829179	-0.270244	9.86267	0.468905	0.493491	0.915683	Rv0750	Rv0750	conserved hypothetical protein
MT0775	70.9293	48.998	57.3702	48.8159	0.884959	-0.176317	6.06524	0.31223	0.576315	0.943349	Rv0751c	mmsB	methylmalmonate semialdehyde oxidoreductase
MT0776	60.1243	48.6514	47.0912	72.9677	1.10392	0.142634	6.13801	0.189536	0.663303	0.96772	Rv0752c	fadE9	acyl-CoA dehydrogenase
MT0777	82.3151	67.2249	76.3586	95.0708	1.14636	0.197056	6.57699	0.42242	0.515732	0.922431	Rv0753c	mmsA	methylmalmonate semialdehyde dehydrogenase
MT0778	97.2446	55.3739	63.0414	45.0729	0.708116	-0.497943	6.31416	1.36125	0.243321	0.796009	Rv0754	PE_PGRS	PE_PGRS-family protein
MT0779	266.696	396.003	251.457	285.252	0.809946	-0.304102	8.06656	0.713338	0.398338	0.889933	Rv0755c	PPE	PPE-family protein
MT0780	44.2074	52.6711	61.4211	78.4049	1.44393	0.530001	5.74468	3.15189	0.075839	0.514523
MT0781	108.805	87.4617	252.824	117.016	1.88385	0.913682	6.90843	5.73626	0.0166182	0.212521
MT0782	310.207	359.757	403.111	411.488	1.21591	0.282039	8.4155	0.735576	0.391082	0.888549	Rv0757	phoP	two-component response regulator
MT0783	243.169	217.407	280.825	234.19	1.11813	0.161082	7.84092	0.233027	0.629288	0.958956	Rv0758	phoR	sensor histidine kinase
MT0784	160.099	169.518	131.4	145.502	0.840133	-0.25131	7.14603	0.665118	0.414759	0.899192	Rv0759c	Rv0759c	conserved hypothetical protein
MT0785	60.8795	92.6595	71.1938	87.5455	1.03433	0.0486903	6.18281	0.0225674	0.880588	0.987206	Rv0760c	Rv0760c	conserved hypothetical protein
MT0786	347.036	503.771	293.332	495.054	0.926712	-0.109807	8.6009	0.0798024	0.777565	0.983793	Rv0761c	adhB	zinc-containing alcohol dehydrogenase
MT0787	41.8256	28.4147	35.5969	29.3526	0.92408	-0.113911	5.32116	0.0873223	0.767609	0.981048	Rv0762c	Rv0762c	hypothetical protein
MT0787.1	24.0497	14.4152	15.292	15.287	0.794285	-0.332271	4.34615	0.69904	0.403106	0.889933
MT0788	142.091	82.3332	87.0427	66.6638	0.68476	-0.54633	6.81735	1.36781	0.242189	0.796009	Rv0764c	Rv0764c	possible lanosterol 14-demethylase cytochrome P450
MT0789	52.6887	26.4048	34.6348	19.7391	0.686896	-0.541836	5.48746	1.21338	0.270664	0.814796	Rv0765c	Rv0765c	short-chain alcohol dehydrogenase family
MT0790	58.672	45.3941	52.813	40.5814	0.89703	-0.156772	5.97127	0.193802	0.659771	0.96772	Rv0766c	Rv0766c	cytochrome p-450
MT0791	20.9709	16.633	16.1528	14.5778	0.816389	-0.292671	4.40811	0.844634	0.358075	0.869579	Rv0767c	Rv0767c	hypothetical protein
MT0792	41.8256	45.3941	39.749	42.2362	0.940222	-0.0889266	5.74917	0.0984848	0.753656	0.977278	Rv0768	aldA	aldehyde dehydrogenases
MT0793	28.4647	36.7311	25.5204	35.8929	0.943086	-0.0845389	5.15219	0.0755445	0.783429	0.983793	Rv0769	Rv0769	similar to 7-alpha-hydroxysteroid dehydrogenase
MT0794	15.7427	18.7121	14.5324	19.8179	0.99873	-0.00183294	4.37243	3.62548e-05	0.995196	0.998284	Rv0770	Rv0770	similar to 3-hydroxyisobutyrate dehydrogenase
MT0795	8.24894	11.5738	9.31697	14.302	1.19584	0.258025	3.65743	0.61104	0.434396	0.905045	Rv0771	Rv0771	probable 4-carboxymuconolactone decarboxylase
MT0796	40.1991	48.5128	33.2676	39.7934	0.824095	-0.279118	5.73817	0.875286	0.349496	0.869542	Rv0772	purD	phosphoribosylamine-glycine ligase
MT0797	81.7342	95.1544	99.4991	144.557	1.38008	0.464747	6.63938	2.18723	0.139159	0.693444	Rv0773c	ggtA	putative [gamma]-glutamyl transpeptidase
MT0798	92.4811	98.9662	112.968	136.952	1.30558	0.384687	6.76847	1.44818	0.228821	0.792407	Rv0774c	Rv0774c	conserved hypothetical protein
MT0799	105.842	89.4715	126.235	122.966	1.27573	0.351328	7.0042	1.26482	0.26074	0.807727	Rv0775	Rv0775	conserved hypothetical protein
MT0800	7.14521	8.31648	11.1905	14.5778	1.66943	0.739353	3.71788	4.69525	0.030246	0.319833	Rv0776c	Rv0776c	conserved hypothetical protein
MT0801	197.336	196.269	164.718	192.23	0.906915	-0.140961	7.63133	0.194598	0.659117	0.96772	Rv0777	purB	adenylosuccinate lyase
MT0802	152.199	154.409	144.919	182.104	1.06668	0.0931258	7.30407	0.0907945	0.763169	0.979115	Rv0778	Rv0778	similar linalool 8-monooxygenase, cytochrome p-450
MT0803	7.31948	5.96015	7.2409	7.48589	1.10725	0.14698	3.20332	0.218525	0.640166	0.962048	Rv0779c	Rv0779c	conserved hypothetical protein
MT0804	58.672	83.5114	68.3582	100.232	1.18626	0.246415	6.35675	0.510102	0.475095	0.909913
MT0805	259.261	436.477	295.51	459.713	1.0856	0.118491	8.75548	0.0857671	0.769629	0.982662	Rv0781	ptrBb	protease II, [beta] subunit
MT0806	8.13276	6.44528	7.54472	7.52529	1.03195	0.0453744	3.4073	0.0194396	0.889114	0.987206
MT0807	243.867	219.694	191.909	197.037	0.839031	-0.253205	7.82286	0.579004	0.446703	0.905045	Rv0783c	Rv0783c	multidrug resistance protein
MT0808	108.282	117.748	48.9647	64.8909	0.503849	-0.988936	6.51451	5.88311	0.0152868	0.202639	Rv0784	Rv0784	conserved hypothetical protein
MT0809	89.9832	104.441	81.8779	98.3804	0.927347	-0.108818	6.74112	0.125476	0.723169	0.973273	Rv0785	Rv0785	putative dehydrogenases
MT0810	47.6347	27.3058	40.1035	23.0487	0.841498	-0.248967	5.34643	0.487967	0.484835	0.909913	Rv0786c	Rv0786c	conserved hypothetical protein
MT0811	11.9087	12.4747	11.1905	12.8442	0.986606	-0.0194539	3.90951	0.00385324	0.950504	0.993521	Rv0787	Rv0787	hypothetical protein
MT0812	160.738	217.823	149.122	201.055	0.925171	-0.112208	7.66885	0.103268	0.747943	0.973668
MT0813	98.1159	105.411	85.473	94.7162	0.885442	-0.17553	6.82797	0.333464	0.563626	0.940949	Rv0788	purQ	phosphoribosylformylglycinamidine synthase I
MT0814	22.2489	19.9596	38.9388	23.3639	1.47433	0.560061	4.76674	2.71184	0.0996058	0.598535	Rv0789c	Rv0789c	hypothetical protein
MT0815	82.7799	65.6309	67.8518	62.1329	0.875597	-0.191662	5.98897	0.414914	0.519486	0.924097	Rv0790c	Rv0790c	hypothetical protein
MT0816	104.157	73.2544	72.5609	69.0672	0.798092	-0.325374	6.21327	1.1014	0.293959	0.832566
MT0817	204.887	147.756	148.16	137.386	0.809631	-0.304663	7.26288	0.8678	0.351565	0.869542
MT0818	5.57675	5.33641	5.46865	5.35832	0.991385	-0.0124829	2.59508	0.00168202	0.967286	0.993521
MT0819	171.311	192.457	139.451	197.549	0.926558	-0.110046	7.32529	0.118948	0.730178	0.973668	Rv0798c	Rv0798c	similar to bacteriocins
MT0820	231.958	234.802	168.06	228.477	0.84963	-0.235094	7.64771	0.512768	0.473943	0.909913	Rv0799c	Rv0799c	conserved hypothetical protein
MT0821	139.825	72.6306	99.4485	80.0202	0.844451	-0.243915	6.58259	0.420684	0.516596	0.922431	Rv0800	pepC	aminopeptidase I
MT0822	26.6638	26.1276	26.128	26.3582	0.99419	-0.00840628	4.84446	0.000848274	0.976765	0.993953	Rv0802c	Rv0802c	acetyltransferase
MT0823	292.721	325.59	254.697	303.494	0.902815	-0.147497	8.37758	0.197702	0.656582	0.96772	Rv0803	purL	phosphoribosylformylglycinamidine synthase II
MT0824	20.2157	21.4843	23.6469	21.6697	1.08663	0.119856	4.77189	0.168929	0.681066	0.96772	Rv0804	Rv0804	conserved hypothetical protein
MT0825	1276.73	1531.55	2274.4	2463.21	1.68703	0.754482	10.6545	3.29821	0.0693553	0.494156	Rv0805	Rv0805	conserved hypothetical protein
MT0826	83.6512	152.469	137.223	201.528	1.43501	0.521064	7.1401	1.71543	0.190282	0.764717	Rv0806c	cpsY	probable UDP-glucose-4-epimerase
MT0828	23.9335	13.5836	17.6212	11.5834	0.776641	-0.36468	4.11207	0.946118	0.330709	0.859471	Rv0807	Rv0807	conserved hypothetical protein
MT0829	863.06	756.384	794.119	533.311	0.81966	-0.286902	9.33654	0.53778	0.463354	0.908047	Rv0808	purF	amidophosphoribosyltransferase
MT0830	332.746	252.197	302.801	231.353	0.913093	-0.131166	8.1142	0.136346	0.711941	0.970166	Rv0809	purM	5'-phosphoribosyl-5-aminoimidazole synthase
MT0831	540.248	559.699	602.919	462.116	0.968241	-0.0465626	8.86975	0.0178192	0.893807	0.987206	Rv0810c	Rv0810c	hypothetical protein
MT0832	468.563	256.286	306.802	180.646	0.672399	-0.572611	8.20957	1.96605	0.160868	0.725269	Rv0811c	Rv0811c	conserved hypothetical protein
MT0833	46.3567	34.9985	69.9279	58.3112	1.57522	0.655554	5.75461	4.69151	0.0303121	0.319833
MT0834	48.7966	38.741	52.1041	48.7765	1.15189	0.204004	5.5982	0.487822	0.4849	0.909913	Rv0813c	Rv0813c	conserved hypothetical protein
MT0835	3.42738	4.29685	9.97523	10.559	2.66074	1.41183	2.95684	10.2838	0.00134205	0.0343254
MT0836	23.0041	39.2261	56.7626	65.6788	1.96868	0.977229	5.71446	5.64772	0.0174781	0.221389	Rv0814c	sseC2	thiosulfate sulfurtransferase
MT0837	503.127	939.208	844.249	1263.03	1.46107	0.547022	9.65295	1.54705	0.213571	0.779641	Rv0815c	cysA2	thiosulfate sulfurtransferase
MT0838	4.87966	5.89084	7.13963	7.56469	1.36831	0.452392	2.68413	2.17176	0.140565	0.696713	Rv0816c	thiX	equivalent to M. leprae ThiX
MT0839	44.8464	52.3938	60.2058	68.0034	1.31889	0.399325	5.63121	1.83427	0.175624	0.742576	Rv0817c	Rv0817c	probable exported protein
MT0840	250.779	254.484	308.371	246.325	1.09779	0.134602	7.91527	0.162568	0.686803	0.96772	Rv0818	Rv0818	two-component response regulator
MT0841	88.1242	97.2336	137.172	114.81	1.35938	0.44295	6.81146	2.09272	0.148003	0.705533	Rv0819	Rv0819	conserved hypothetical protein
MT0842	51.9335	85.4519	81.9285	96.6862	1.30074	0.37933	6.19087	1.40639	0.235656	0.792601	Rv0820	phoT	phosphate transport system ABC transporter
MT0843	429.352	324.689	335.563	224.931	0.743251	-0.428078	8.32194	1.43249	0.231359	0.792407	Rv0821c	phoY2	phosphate transport system regulator
MT0844	659.625	402.518	549.701	347.07	0.844249	-0.244259	8.85346	0.351078	0.553504	0.935252	Rv0822c	Rv0822c	conserved hypothetical protein
MT0845	3630	2211.77	2202.8	540.678	0.469626	-1.09042	10.8332	2.99362	0.0835931	0.543533	Rv0823c	Rv0823c	transcriptional regulator (NifR3/Smm1 family)
MT0846	13685	10145	6629.88	1992.07	0.36181	-1.4667	12.7027	5.08537	0.0241285	0.275275	Rv0824c	desA1	acyl-[ACP] desaturase
MT0847	29.5103	41.721	34.4323	41.1724	1.06225	0.0871189	5.19783	0.07364	0.786109	0.983793	Rv0825c	Rv0825c	conserved hypothetical protein
MT0848	845.11	777.245	1519.78	1150.38	1.64583	0.718816	9.84459	3.59902	0.0578136	0.450217	Rv0826	Rv0826	conserved hypothetical protein
MT0849	102.357	83.0955	116.563	30.4164	0.792226	-0.336017	6.40589	0.449086	0.502769	0.922431	Rv0827c	Rv0827c	transcriptional regulator (ArsR family)
MT0850	2.90456	4.22755	4.86103	3.15195	1.1225	0.166711	1.91465	0.228067	0.632961	0.959069	Rv0829	Rv0829	probable transposase fragment, highly similarsim
MT0851	43.0455	54.9581	202.644	157.283	3.67302	1.87697	6.40908	34.2756	4.7833e-09	3.23481e-07	Rv0830	Rv0830	conserved hypothetical protein
MT0852	1020.31	1254.89	1026.49	1291.04	1.01862	0.0266141	9.96488	0.00487806	0.944319	0.993304	Rv0831c	Rv0831c	conserved hypothetical protein
MT0854	15.9751	15.9399	16.0515	12.0168	0.878339	-0.18715	4.34774	0.385772	0.53453	0.931102	Rv0832	PE_PGRS	PE_PGRS-family protein
MT0854.1	9.41076	10.257	7.34217	4.84613	0.617903	-0.694547	3.35409	4.67105	0.0306752	0.32209
MT0855	344.597	202.992	219.151	122.69	0.624181	-0.679964	8.0234	2.27903	0.131134	0.676839	Rv0834c	PE_PGRS	PE_PGRS-family protein
MT0856	94.9209	98.481	126.539	132.54	1.33963	0.421836	6.58165	2.09424	0.147855	0.705533	Rv0835	lpqQ	lipoprotein
MT0856.1	15.278	17.1181	15.292	14.7354	0.92714	-0.109141	3.93225	0.113342	0.736371	0.973668
MT0857	10.2821	8.80161	8.50679	4.88553	0.698896	-0.51685	3.13768	2.04822	0.152384	0.714193	Rv0836c	Rv0836c	hypothetical protein
MT0858	26.6057	20.7912	26.4318	14.3808	0.859579	-0.218298	4.41807	0.369891	0.543064	0.931102	Rv0837c	Rv0837c	hypothetical protein
MT0860	28.2904	19.9596	35.6982	24.4276	1.24421	0.315225	4.94312	0.950535	0.329583	0.859456	Rv0838	lpqR	lipoprotein
MT0861	68.7218	90.3725	44.053	46.4519	0.569069	-0.813325	6.22685	6.80638	0.00908329	0.139932	Rv0839	Rv0839	conserved hypothetical protein
MT0862	23.3526	27.9295	22.3303	19.6997	0.819677	-0.286873	4.80212	0.895135	0.34409	0.868385
MT0864	29.336	22.7317	25.8242	21.7485	0.912811	-0.131612	4.62687	0.168656	0.681309	0.96772	Rv0842	Rv0842	Unknown integral membrane protein
MT0865	20.9128	15.3855	15.5452	11.8986	0.754735	-0.405958	4.02871	1.45475	0.227767	0.792407	Rv0843	Rv0843	similar to various dehydrogenases
MT0866	143.717	82.2639	157.528	73.8739	1.02364	0.0337054	6.68013	0.00593999	0.938567	0.991666	Rv0844c	narL	two-component response regulator
MT0867	33.3443	48.5821	35.4956	45.7821	0.993018	-0.010108	5.36712	0.0010777	0.973811	0.993521	Rv0845	Rv0845	sensor histidine kinase
MT0868	4.18256	4.50476	2.98751	4.49153	0.86642	-0.206861	2.60684	0.359855	0.548587	0.933815
MT0869	172.473	184.834	88.3086	153.934	0.678087	-0.560458	7.71179	1.75005	0.18587	0.76142	Rv0846c	Rv0846c	similar to several L-ascorbate oxidases
MT0870	297.485	164.389	120.766	119.577	0.520334	-0.942491	7.85326	5.01235	0.0251671	0.282069	Rv0847	lpqS	lipoprotein
MT0873	19.112	16.0092	7.89917	12.2532	0.57464	-0.79927	4.36745	4.04358	0.0443395	0.389553	Rv0850	Rv0850	transposase fragment
MT0874	31.3692	25.0188	31.3941	26.7128	1.02967	0.0421875	4.91904	0.0176187	0.894403	0.987206	Rv0851c	Rv0851c	Short-chain dehydrogenases/reductase
MT0875	15.7427	18.4349	19.3428	20.4877	1.16625	0.221878	4.11919	0.548991	0.45873	0.907454	Rv0852	fadD16	acyl-CoA synthase
MT0876	176.423	171.25	198.796	211.811	1.18102	0.240031	7.51821	0.580787	0.446004	0.905045	Rv0853c	pdc	pyruvate (or indolepyruvate) decarboxylase
MT0877	68.7799	81.0857	81.7766	94.5586	1.17692	0.235018	6.11094	0.657179	0.417558	0.90057	Rv0854	Rv0854	conserved hypothetical protein
MT0878	68.838	58.6312	94.9925	82.7782	1.39419	0.479432	6.03228	2.6677	0.102404	0.60893	Rv0855	far	fatty acyl-CoA racemase
MT0879	144.473	147.618	202.644	180.489	1.31165	0.39138	7.16413	1.43155	0.231512	0.792407	Rv0856	Rv0856	conserved hypothetical protein
MT0880	111.128	68.611	115.247	63.7089	0.995137	-0.00703245	6.43006	0.000365699	0.984743	0.995723	Rv0857	Rv0857	conserved hypothetical protein
MT0881	47.17	60.0173	69.6241	94.992	1.5364	0.619553	5.91303	3.52026	0.0606231	0.456389	Rv0858c	Rv0858c	possible aminotransferase
MT0882	559.185	891.874	2096.22	2808.19	3.37994	1.757	10.0534	15.4419	8.50816e-05	0.00305834	Rv0859	fadA	[beta] oxidation complex, subunit (acetyl-CoA
MT0883	1057.2	1558.58	3637.82	4396.23	3.0714	1.6189	10.8455	12.4725	0.000412995	0.0129752	Rv0860	fadB	hypothetical protein
MT0884	164.863	124.817	117.677	114.219	0.80044	-0.321134	7.0706	0.976003	0.323188	0.854823	Rv0861c	Rv0861c	probable DNA helicase
MT0885	130.937	68.4031	95.4483	74.1103	0.850254	-0.234033	6.56375	0.419763	0.517056	0.922431	Rv0862c	Rv0862c	conserved hypothetical protein
MT0886	386.248	317.62	363.919	199.479	0.800344	-0.321308	8.18488	0.75971	0.383419	0.883856	Rv0863	Rv0863	conserved hypothetical protein
MT0887	544.662	524.424	532.89	389.621	0.862872	-0.212781	8.87588	0.311927	0.5765	0.943349
MT0888	112.058	97.7187	121.779	70.525	0.916466	-0.125847	6.52235	0.106715	0.743915	0.973668	Rv0865	mog	molybdopterin biosynthesis
MT0889	63.6098	52.1166	77.9283	40.3056	1.02112	0.0301538	5.81964	0.00583146	0.939129	0.991666
MT0890	351.219	834.698	534.814	829.003	1.15007	0.201726	9.33261	0.192231	0.661066	0.96772	Rv0867c	Rv0867c	probable exported protein
MT0891	87.1948	69.304	114.538	124.542	1.52742	0.611095	6.45512	4.09559	0.0429951	0.380127	Rv0868c	moaD2	molybdopterin converting factor subunit 1
MT0892	177.875	127.312	179.25	146.251	1.06637	0.0927034	7.29943	0.078679	0.779096	0.983793	Rv0869c	moaA2	molybdenum cofactor biosynthesis, protein A
MT0892.1	229.46	219.902	233.633	242.306	1.05914	0.082896	7.61673	0.0673132	0.79529	0.983793	Rv0870c	Rv0870c	unknown hydrophobic protein
MT0893	88.0662	173.884	131.906	211.023	1.30951	0.389027	7.15355	0.985827	0.320765	0.8543	Rv0871	cspB	probable cold shock protein
MT0894	1243.15	646.537	481.545	267.759	0.396501	-1.3346	9.40083	8.62593	0.0033141	0.0703366	Rv0872c	PE_PGRS	PE_PGRS-family protein
MT0896	910.985	964.851	866.174	853.746	0.916884	-0.125188	9.63643	0.118913	0.730217	0.973668	Rv0873	fadE10	acyl-CoA dehydrogenase
MT0897	141.336	75.8879	109.221	40.6602	0.689695	-0.53597	6.43021	1.23468	0.266499	0.811053
MT0898	242.879	115.461	171.402	61.9753	0.651115	-0.619016	7.14003	1.42157	0.233146	0.792601	Rv0875c	Rv0875c	possible exported protein
MT0899	1026.99	485.752	631.326	240.14	0.57605	-0.795735	9.11341	2.21073	0.137054	0.691334	Rv0876c	Rv0876c	possible membrane protein
MT0900	358.364	256.633	280.724	219.415	0.813164	-0.298381	8.17567	0.71474	0.397875	0.889933	Rv0877	Rv0877	conserved hypothetical protein
MT0901	12.141	16.0092	17.5199	23.0487	1.44369	0.529761	3.96143	2.77048	0.0960176	0.583121	Rv0878c	PPE	PPE-family protein
MT0902	30.2655	17.9497	30.1789	30.0618	1.24844	0.32013	5.16903	0.60064	0.438334	0.905045	Rv0879c	Rv0879c	hypothetical protein
MT0904	16.1493	26.7514	25.2672	28.21	1.24834	0.320007	4.64905	0.976084	0.323167	0.854823	Rv0881	Rv0881	possible rRNA methyltransferase
MT0905	3.54356	2.70286	5.92437	3.86114	1.55307	0.63512	2.37593	3.17303	0.0748634	0.510607	Rv0882	Rv0882	unknown hydrophobic protein
MT0906	449.161	375.766	481.495	327.33	0.98042	-0.028528	8.67001	0.00629918	0.93674	0.991666	Rv0883c	Rv0883c	conserved hypothetical protein
MT0907	391.36	316.442	485.495	410.818	1.26627	0.340583	8.6076	0.965426	0.325824	0.855997	Rv0884c	serC	phosphoserine aminotransferase
MT0908	1440.72	968.385	6641.43	5110.03	4.87786	2.28625	11.0139	25.1806	5.22048e-07	2.67048e-05	Rv0885	Rv0885	unknown transmembrane protein
MT0909	123.095	90.5111	802.778	589.888	6.51842	2.70452	7.93439	53.8502	2.16368e-13	1.83683e-11	Rv0886	fprB	ferredoxin, ferredoxin-NADP reductase
MT0910	29.336	33.1966	23.6975	21.4333	0.721746	-0.470438	5.18732	2.55096	0.110227	0.633318	Rv0887c	Rv0887c	hypothetical protein
MT0910.2	1.74273	2.70286	3.24068	3.62475	1.55733	0.639074	2.08854	3.12632	0.0770373	0.5201
MT0910.3	4.87966	3.74242	7.84853	4.80673	1.45937	0.545346	2.292	1.94672	0.162941	0.725597
MT0910.4	2.78837	4.08894	2.43051	3.07316	0.807984	-0.307601	2.41444	0.766607	0.381269	0.883856
MT0911	171.311	294.542	146.995	437.964	1.25582	0.32863	7.4632	0.395682	0.529328	0.930814	Rv0888	Rv0888	possible membrane protein
MT0912	375.094	156.073	241.633	113.943	0.669313	-0.579247	7.67377	1.43062	0.231663	0.792407	Rv0889c	citA	citrate synthase 2
MT0914	93.5848	130.846	121.019	170.954	1.30126	0.379912	7.35694	1.17464	0.27845	0.819333	Rv0890c	Rv0890c	transcriptional regulator (LuxR/UhpA family)
MT0915	101.543	166.26	142.033	211.733	1.32126	0.401914	7.64028	1.02366	0.311652	0.8488	Rv0891c	Rv0891c	putative transcriptional regulator
MT0915.1	2.90456	8.10857	8.15234	11.544	1.79853	0.846815	3.304	3.67234	0.0553224	0.439714
MT0916	100.207	144.845	132.108	157.558	1.18226	0.241551	7.6253	0.429047	0.512457	0.922431	Rv0892	Rv0892	putative monooxygenase
MT0917	13.0124	21.5536	27.242	28.4464	1.6134	0.690106	4.58951	4.30672	0.0379621	0.356397	Rv0893c	Rv0893c	conserved hypothetical protein
MT0918	3.71783	5.47502	5.21548	5.75232	1.19956	0.26251	2.4144	0.681931	0.408923	0.895419	Rv0894	Rv0894	putative transcriptional regulator
MT0919	7.95849	8.24718	9.11442	9.25887	1.13412	0.181573	3.31114	0.385389	0.534733	0.931102	Rv0895	Rv0895	conserved hypothetical protein
MT0920	2490.08	2800.78	2454.46	2242.93	0.887832	-0.171641	10.9472	0.166045	0.683651	0.96772	Rv0896	gltA2	citrate synthase 1
MT0921	232.887	139.717	156.363	88.6487	0.657423	-0.605106	7.37404	2.02335	0.154897	0.720585	Rv0897c	Rv0897c	possible oxidoreductase
MT0921.1	200.531	119.757	136.666	85.5756	0.693663	-0.527692	7.11543	2.13854	0.143639	0.700677	Rv0898c	Rv0898c	hypothetical protein
MT0922	86.4396	90.3725	62.8895	78.3261	0.798883	-0.323945	6.57812	1.19895	0.273531	0.815077	Rv0899	ompA	member of OmpA family
MT0923	20.0414	22.3852	17.1655	18.0055	0.829439	-0.269793	4.39653	0.76804	0.380824	0.883856	Rv0900	Rv0900	hypothetical protein
MT0924	27.6514	32.1571	26.7863	32.3469	0.989448	-0.0153048	5.31268	0.00261577	0.95921	0.993521	Rv0901	Rv0901	conserved hypothetical protein
MT0925	544.372	240.208	351.766	146.645	0.635184	-0.654753	8.40476	1.73011	0.188397	0.763856	Rv0902c	Rv0902c	sensor histidine kinase
MT0926	365.393	192.457	261.989	116.347	0.678097	-0.560437	7.87337	1.41371	0.234442	0.792601	Rv0903c	Rv0903c	two-component response regulator
MT0927	39.7343	40.4043	35.1918	41.4482	0.956674	-0.0639005	5.25297	0.0504377	0.822303	0.983793	Rv0904c	accD3	acetyl/propionyl CoA carboxylase [beta] subunit
MT0928	372.829	266.127	491.824	373.034	1.35345	0.436646	8.43227	1.24544	0.264425	0.80981	Rv0905	echA6	enoyl-CoA hydratase/isomerase superfamily (aka
MT0929	308.638	191.487	346.753	250.265	1.19361	0.255336	8.0382	0.376973	0.539228	0.931102	Rv0906	Rv0906	probable membrane protein
MT0930	179.153	153.439	230.24	217.248	1.34536	0.427996	7.5279	1.60932	0.204587	0.772521	Rv0907	Rv0907	probable penicillin binding protein
MT0931	185.427	135.836	239	216.776	1.41853	0.504399	7.53841	1.99607	0.157708	0.721076
MT0933	54.9542	57.9382	60.6615	58.9021	1.05912	0.0828678	5.86737	0.0848174	0.770872	0.982732	Rv0909	Rv0909	hypothetical protein
MT0934	122.63	135.212	116.766	141.444	1.00156	0.00225172	6.91513	5.32804e-05	0.994176	0.998284	Rv0910	Rv0910	conserved hypothetical protein
MT0934.1	41.6513	51.1464	46.9393	65.9152	1.21689	0.283197	5.75926	0.850255	0.35648	0.869542	Rv0911	Rv0911	conserved hypothetical protein
MT0936	21.3194	18.5735	21.2164	15.6022	0.921881	-0.117347	4.44507	0.116832	0.732496	0.973668	Rv0912	Rv0912	conserved hypothetical protein
MT0937	44.4978	42.5527	53.0662	60.3993	1.30352	0.382415	5.4504	1.79946	0.179778	0.749544
MT0938	365.858	236.535	298.902	221.346	0.863558	-0.211635	7.88012	0.281294	0.595854	0.948944	Rv0913c	Rv0913c	probable dioxygenase
MT0939	182.348	83.5114	125.425	81.5962	0.778439	-0.361343	6.89861	0.75755	0.384096	0.883856	Rv0914c	Rv0914c	lipid transfer protein
MT0940	22.4813	15.8706	19.8492	11.544	0.816678	-0.292161	4.1383	0.668091	0.413718	0.899192	Rv0915c	PPE	PPE-family protein
MT0941	19.112	11.9203	18.5327	13.711	1.03727	0.0527937	3.83003	0.0166761	0.89725	0.987206	Rv0916c	PE	PE-family protein
MT0942	46.7634	70.4822	56.0537	69.4218	1.07081	0.0987087	5.85971	0.0951687	0.757706	0.977484	Rv0917	betP	glycine betaine transport
MT0943	1.68464	2.84147	1.77225	2.08817	0.865573	-0.208272	1.15651	0.347087	0.555767	0.937075
MT0944	28.3485	21.8308	32.8119	23.7579	1.1258	0.170948	4.61128	0.312434	0.57619	0.943349	Rv0918	Rv0918	conserved hypothetical protein
MT0945	20.2157	17.7418	22.7354	17.6903	1.06365	0.0890183	4.31081	0.0897684	0.764472	0.979993	Rv0919	Rv0919	conserved hypothetical protein
MT0946	6.09957	8.663	5.97501	8.51028	0.985913	-0.0204679	3.07894	0.00358712	0.952241	0.993521
MT0947	87.311	144.915	80.5614	130.727	0.910178	-0.135779	7.09995	0.131095	0.717299	0.971822	Rv0920c	Rv0920c	probable transposase, related to IS1081
MT0948	56.0579	57.9382	65.877	53.1498	1.0439	0.0619893	5.80666	0.0460041	0.830168	0.983793	Rv0921	Rv0921	resolvase
MT0949	733.575	657.765	724.799	765.767	1.07131	0.09938	9.45301	0.0775387	0.780661	0.983793	Rv0922	Rv0922	transposase
MT0950	55.3028	48.3742	46.5342	46.5307	0.897492	-0.15603	5.70192	0.295982	0.586413	0.947666	Rv0923c	Rv0923c	hypothetical protein
MT0951	46.1244	77.4126	52.1041	78.2079	1.05548	0.0778926	6.12501	0.0438372	0.834157	0.983793	Rv0924c	nramp	transmembrane protein belonging to Nramp family
MT0952	308.173	472.446	251.659	351.167	0.772312	-0.372744	8.51309	0.948958	0.329985	0.859456	Rv0925c	Rv0925c	hypothetical protein
MT0953	134.365	163.696	117.12	149.087	0.893298	-0.162786	7.12605	0.262746	0.60824	0.953211	Rv0926c	Rv0926c	conserved hypothetical protein
MT0954	77.784	85.1747	68.9658	73.9921	0.877402	-0.18869	6.27133	0.423678	0.515108	0.922431	Rv0927c	Rv0927c	short-chain alcohol dehydrogenase family
MT0955	486.571	735.177	499.065	572.356	0.876987	-0.189373	8.96122	0.218796	0.639959	0.962048
MT0956	109.908	149.974	133.172	152.042	1.09768	0.134454	6.91266	0.177243	0.673753	0.96772	Rv0929	pstC2	membrane-bound component of phosphate transport
MT0957	129.253	145.608	130.843	149.6	1.02042	0.0291573	6.99367	0.00857996	0.926199	0.990937	Rv0930	pstA1	PstA component of phosphate uptake
MT0958	2587.61	2152.1	2312.03	1940.58	0.897225	-0.156458	11.1672	0.124486	0.724219	0.973273	Rv0931c	pknD	serine-threonine protein kinase
MT0959	2277.17	2416.42	2487.73	1913.04	0.937609	-0.0929415	11.1143	0.0449267	0.832139	0.983793	Rv0932c	pstS	PstS component of phosphate uptake
MT0960	110.373	166.953	166.946	217.288	1.38577	0.470691	7.30121	1.89303	0.16886	0.733136	Rv0933	pstB	ABC transport component of phosphate uptake
MT0961	161.087	199.041	208.518	313.935	1.4509	0.536953	7.8302	2.23115	0.135253	0.686591	Rv0934	phoS1	PstS component of phosphate uptake
MT0962	127.917	133.202	142.489	218.391	1.38224	0.467005	7.23571	2.07555	0.149675	0.710959	Rv0935	pstC	PstC component of phosphate uptake
MT0963	24.5145	23.9792	36.3058	49.2493	1.7648	0.819502	5.05037	7.5318	0.00606193	0.109444	Rv0936	pstA2	PstA component of phosphate uptake
MT0964	74.3566	77.1354	85.5743	68.161	1.01464	0.0209623	6.37866	0.00510627	0.943033	0.99313	Rv0937c	Rv0937c	conserved hypothetical protein
MT0965	433.418	299.186	316.827	185.611	0.685762	-0.544221	8.3721	1.64716	0.199345	0.772521	Rv0938	Rv0938	conserved hypothetical protein
MT0966	245.319	173.676	222.493	116.78	0.809582	-0.30475	7.84908	0.570128	0.450208	0.90677	Rv0939	Rv0939	probable dehydrase
MT0967	150.746	143.321	132.311	80.7294	0.724306	-0.46533	6.94962	1.74626	0.186348	0.761812	Rv0940c	Rv0940c	probable monooxygenase
MT0968	128.556	113.659	112.31	79.3504	0.791097	-0.338073	6.72231	1.05872	0.303507	0.845042
MT0968.1	81.0952	64.3141	57.4209	46.0973	0.711606	-0.490849	6.02732	2.54971	0.110315	0.633318
MT0969	1.91701	1.38608	2.02543	2.08817	1.23623	0.305948	1.24514	0.706677	0.400549	0.889933	Rv0943c	Rv0943c	probable monooxygenase
MT0970	16.2074	28.4147	24.9128	29.4314	1.21967	0.286488	4.74404	0.700352	0.402666	0.889933	Rv0944	Rv0944	possible formamidopyrimidine-DNA glycosylase
MT0971	106.423	89.6101	102.942	95.7012	1.01318	0.0188908	6.69742	0.00329513	0.954224	0.993521	Rv0945	Rv0945	ketoacyl reductase
MT0972	194.78	155.241	175.098	121.311	0.846676	-0.240118	7.32421	0.506406	0.476699	0.909913	Rv0946c	pgi	glucose-6-phosphate isomerase
MT0974	3.42738	7.48484	4.30403	5.75232	0.929287	-0.105804	2.50691	0.0821845	0.774359	0.983793
MT0975	128.207	191.348	180.567	193.136	1.1696	0.226013	7.6072	0.419784	0.517045	0.922431	Rv0948c	Rv0948c	hypothetical protein
MT0976	428.132	303.898	280.522	176.746	0.624595	-0.679008	8.21049	2.94997	0.0858793	0.547501	Rv0949	uvrD	DNA-dependent ATPase I and helicase II
MT0977	163.527	282.414	308.371	335.723	1.44451	0.530579	7.71487	2.15202	0.142382	0.700677	Rv0950c	Rv0950c	conserved hypothetical protein
MT0978	854.056	1045.45	731.635	985.971	0.904258	-0.145193	9.67624	0.145717	0.702662	0.968687	Rv0951	sucC	succinyl-CoA synthase [beta] chain
MT0979	578.53	817.857	539.928	853.431	0.997875	-0.00306838	9.31748	6.14765e-05	0.993744	0.998284	Rv0952	sucD	succinyl-CoA synthase [alpha] chain
MT0980	17.195	14.9004	17.6719	16.2326	1.05542	0.0778219	3.87559	0.065349	0.798233	0.983793	Rv0953c	Rv0953c	similar to alkanal monooxygenase beta chains
MT0981	603.044	661.299	601.704	721.522	1.04659	0.0656987	9.23406	0.0345967	0.852443	0.983793	Rv0954	Rv0954	cell envelope antigen
MT0982	133.842	105.065	138.691	123.084	1.09552	0.131621	7.05552	0.176604	0.674308	0.96772	Rv0955	Rv0955	possible membrane protein
MT0983	59.7758	64.1062	51.8003	60.6357	0.907852	-0.139471	5.87868	0.221233	0.638102	0.961226	Rv0956	purN	phosphoribosylglycinamide formyltransferase I
MT0984	222.082	265.712	195.707	271.344	0.957576	-0.062541	7.90291	0.0328518	0.856171	0.983793	Rv0957	purH	phosphoribosylaminoimidazolecarboxamide
MT0985	202.273	138.955	134.033	129.191	0.771302	-0.374632	7.31905	1.35166	0.244988	0.798586	Rv0958	Rv0958	similar to magnesium-chelatase subunit
MT0986	127.336	68.4031	88.9669	82.1478	0.873903	-0.194455	6.75793	0.318384	0.57258	0.943349	Rv0959	Rv0959	hypothetical protein
MT0987	3.77592	5.05919	5.92437	5.39772	1.2844	0.36109	2.46358	1.30511	0.253281	0.802704
MT0988	13.1286	12.8906	16.406	16.0356	1.24647	0.317844	4.02528	1.23139	0.267136	0.811053	Rv0960	Rv0960	conserved hypothetical protein
MT0989	36.6555	33.3352	49.0153	38.6114	1.25138	0.323517	5.24462	0.971845	0.324221	0.855582	Rv0961	Rv0961	hypothetical protein
MT0990	4.18256	5.33641	5.77247	4.96433	1.1288	0.17479	2.71453	0.243479	0.621705	0.958306	Rv0962c	Rv0962c	hypothetical protein
MT0992	6.09957	12.544	5.36738	9.18007	0.784819	-0.349568	3.43768	0.801862	0.370537	0.878511	Rv0963c	Rv0963c	conserved hypothetical protein
MT0992.1	3.71783	3.67311	3.79768	4.21574	1.08568	0.118594	2.21081	0.144513	0.703835	0.968687	Rv0964c	Rv0964c	hypothetical protein
MT0993	32.5891	26.9593	36.559	31.1255	1.1358	0.183712	4.87325	0.366985	0.544652	0.931102	Rv0965c	Rv0965c	conserved hypothetical protein
MT0994	214.937	139.301	170.49	153.146	0.913462	-0.130583	7.20941	0.157764	0.691224	0.96772	Rv0966c	Rv0966c	conserved hypothetical protein
MT0995	351.103	227.04	152.717	93.4948	0.425814	-1.2317	7.68186	7.15422	0.00747879	0.123307	Rv0967	Rv0967	conserved hypothetical protein
MT0996	187.053	126.688	91.1949	52.2436	0.457071	-1.12951	6.98645	6.38491	0.0115095	0.168215	Rv0968	Rv0968	conserved hypothetical protein
MT0997	440.273	267.721	204.518	110.752	0.445249	-1.16732	8.25665	5.92653	0.0149146	0.200367	Rv0969	ctpV	cation transport ATPase
MT0998	79.5849	66.1854	58.2817	51.0223	0.749681	-0.415652	6.20868	1.41294	0.23457	0.792601	Rv0970	Rv0970	hypothetical protein
MT0999.1	24.2821	21.5536	84.5616	60.9115	3.17218	1.66547	5.36075	15.2811	9.26371e-05	0.0033002	Rv0971c	echA7	enoyl-CoA hydratase/isomerase superfamily
MT1000	252.929	230.575	588.741	573.104	2.40291	1.26478	8.34268	6.05078	0.0139001	0.18955	Rv0972c	fadE12	acyl-CoA dehydrogenase
MT1001	247.236	174.438	428.378	375.398	1.90606	0.930597	8.12346	2.43033	0.119008	0.654955
MT1002	177.468	157.251	285.889	279.736	1.6898	0.756856	7.64401	1.42682	0.232285	0.792601	Rv0974c	accD2	acetyl/propionyl-CoA carboxylase, [beta] subunit
MT1003	118.099	85.4519	148.312	131.633	1.37521	0.459647	6.84571	0.518713	0.471391	0.909913	Rv0975c	fadE13	acyl-CoA dehydrogenase
MT1003.1	247.642	208.536	390.907	362.278	1.65103	0.72337	8.04669	1.38235	0.239702	0.796009	Rv0976c	Rv0976c	hypothetical protein
MT1006.1	1.68464	2.21773	3.29132	1.96997	1.34148	0.423823	1.38925	1.36813	0.242133	0.796009
MT1007	44.2654	63.4132	68.4088	77.3805	1.35455	0.437813	6.13246	1.92963	0.164799	0.728989
MT1008	13.6514	15.1776	14.2793	13.6322	0.968428	-0.0462835	3.86398	0.0236209	0.877854	0.987206	Rv0980c	PE_PGRS	PE_PGRS-family protein
MT1009	233.643	158.429	134.995	112.21	0.630403	-0.665653	7.38217	4.03672	0.0445204	0.389553	Rv0981	Rv0981	two-component response regulator
MT1010	695.932	466.555	620.793	306.803	0.797896	-0.325727	9.03082	0.510857	0.474768	0.909913	Rv0982	Rv0982	sensor histidine kinase
MT1011	490.173	565.036	520.839	563.766	1.02788	0.0396693	9.11768	0.0127952	0.909939	0.988973
MT1012	162.655	165.013	202.087	249.911	1.3795	0.464148	7.67429	2.06151	0.151061	0.712934	Rv0984	moaB2	molybdenum cofactor biosynthesis, protein B
MT1013	54.838	78.1056	59.6995	76.1197	1.02217	0.0316355	5.85154	0.0103225	0.919074	0.990574	Rv0985c	mscL	highly similar to large-conductance mechanosensitive
MT1014	68.9542	110.54	95.6508	165.044	1.45296	0.538994	6.64248	2.21887	0.136333	0.688588	Rv0986	Rv0986	Probable ABC transporter
MT1015	238.522	355.946	310.498	463.416	1.302	0.380725	8.18125	1.14618	0.284351	0.828968	Rv0987	Rv0987	potential integral membrane protein
MT1017	67.0372	98.4117	87.2453	134.391	1.3402	0.42245	6.43666	1.66978	0.196288	0.769607	Rv0988	Rv0988	conserved hypothetical protein
MT1018	95.1533	98.3424	87.701	97.6712	0.958109	-0.0617381	6.96926	0.0405001	0.840506	0.983793	Rv0989c	grcC2	heptaprenyl diphosphate synthase II
MT1019	58.0911	78.5908	120.918	97.9076	1.60117	0.679126	6.32194	4.82972	0.0279731	0.303967	Rv0990c	Rv0990c	hypothetical protein
MT1020	311.368	465.238	568.284	405.223	1.25355	0.326024	8.63048	0.797489	0.371845	0.878511
MT1021	28.8713	19.8903	35.6982	24.3488	1.22946	0.298029	5.03148	0.857042	0.354568	0.869542	Rv0992c	Rv0992c	conserved hypothetical protein
MT1022	57.1617	67.4328	49.7749	49.0129	0.793006	-0.334597	5.88658	1.15079	0.283385	0.828355	Rv0993	galU	UTP-glucose-1-phosphate uridylyltransferase
MT1023	245.9	220.525	185.124	142.862	0.703126	-0.508145	7.68697	2.26473	0.132349	0.678417	Rv0994	moeA	molybdopterin biosynthesis
MT1024	28.7551	25.7811	30.1789	31.1649	1.12458	0.169391	5.05662	0.325022	0.568605	0.943349	Rv0995	rimJ	acetylation of 30S S5 subunit
MT1025	1476.1	938.169	839.54	394.231	0.511016	-0.96856	9.98845	4.02556	0.0448157	0.390425	Rv0996	Rv0996	hypothetical protein
MT1025.1	6.09957	5.26711	4.86103	3.90054	0.76755	-0.381667	2.59023	1.49737	0.221076	0.790151
MT1025.2	58.0911	44.0774	61.1679	61.2661	1.19791	0.260515	6.24065	0.774425	0.378852	0.883856
MT1026	40.78	36.4539	41.1668	58.587	1.29183	0.369421	6.02731	1.29742	0.254686	0.803953
MT1027	167.128	116.431	148.363	99.2472	0.872989	-0.195964	6.9615	0.312144	0.576368	0.943349	Rv0998	Rv0998	hypothetical protein
MT1028	72.6139	59.948	72.2571	59.4537	0.993209	-0.00983099	6.08795	0.00106153	0.974009	0.993521	Rv0999	Rv0999	hypothetical protein
MT1029	157.078	122.114	91.448	54.1348	0.521234	-0.939997	6.90305	7.43875	0.00638342	0.111905
MT1030	303.12	201.467	219.506	145.029	0.722339	-0.469252	7.68335	1.50055	0.220586	0.790151	Rv1001	arcA	arginine deiminase
MT1031	152.78	117.955	133.83	122.059	0.945031	-0.0815668	7.05639	0.0632485	0.801433	0.983793
MT1032	16.4979	17.1181	16.811	19.4633	1.07981	0.110774	4.22047	0.142176	0.706127	0.969196	Rv1003	Rv1003	conserved hypothetical protein
MT1033	42.3484	24.9495	46.6355	30.0618	1.13829	0.186872	5.21751	0.266291	0.605831	0.953062	Rv1004c	Rv1004c	possible exported protein
MT1034	61.4604	46.3644	56.155	52.48	1.00708	0.010184	5.94457	0.00117973	0.9726	0.993521	Rv1005c	pabB	p-aminobenzoate synthase
MT1035	497.202	544.938	593.045	771.835	1.30972	0.389259	9.13167	1.1905	0.275229	0.818914	Rv1006	Rv1006	hypothetical protein
MT1036	378.812	306.324	299.257	296.166	0.869031	-0.202521	8.17849	0.356015	0.550728	0.93414	Rv1007c	metS	methionyl-tRNA synthase
MT1037	4.76347	7.20762	7.13963	7.60409	1.23575	0.305383	2.93633	0.758498	0.383799	0.883856	Rv1008	Rv1008	conserved hypothetical protein
MT1038	102.647	177.349	158.844	236.278	1.41151	0.497236	7.31404	1.82018	0.177292	0.74499	Rv1009	Rv1009	conserved hypothetical protein
MT1039	37.1202	42.6913	54.3321	68.7126	1.54238	0.625162	5.6883	4.58785	0.0321995	0.329731	Rv1010	ksgA	16S rRNA dimethyltransferase
MT1040	57.7426	48.2356	66.0796	70.328	1.28689	0.363887	5.83561	1.48794	0.222536	0.791372	Rv1011	Rv1011	conserved hypothetical protein
MT1040.1	4.41493	6.7918	5.62056	7.28889	1.15913	0.213038	2.47397	0.432935	0.510552	0.922431
MT1041	462.057	488.663	383.059	336.156	0.756491	-0.402606	8.68422	1.14057	0.285531	0.829162	Rv1013	pks16	polyketide synthase
MT1042	14.8132	37.2163	19.8492	30.2982	0.965126	-0.0512106	4.8947	0.0121171	0.912348	0.988973	Rv1014c	pth	peptidyl-tRNA hydrolase
MT1043	129.02	221.218	134.893	178.834	0.895919	-0.15856	7.54472	0.162664	0.686716	0.96772	Rv1015c	rplY	50S ribosomal protein L25
MT1044	96.1408	150.32	94.233	154.052	1.00774	0.0111186	6.8082	0.00095401	0.97536	0.993521	Rv1016c	lpqT	similar to M. kansasii Q49597
MT1045	311.833	469.673	360.425	479.767	1.07516	0.104557	8.59526	0.0748331	0.784426	0.983793	Rv1017c	prsA	ribose-phosphate pyrophosphokinase
MT1046	242.879	253.237	243.659	314.329	1.12477	0.169631	8.13437	0.252642	0.615221	0.956297
MT1047	355.75	185.735	284.016	126.118	0.757316	-0.401033	7.84527	0.672436	0.412203	0.898705	Rv1019	Rv1019	transcriptional regulator (TetR/AcrR family)
MT1048	445.849	226.278	390.654	206.886	0.888922	-0.169872	8.35918	0.152136	0.696503	0.96772	Rv1020	mfd	transcription-repair coupling factor
MT1049	176.132	119.688	145.122	119.695	0.895034	-0.159986	7.12049	0.202982	0.652324	0.96772	Rv1021	Rv1021	conserved hypothetical protein
MT1050	88.4728	70.5515	83.5489	75.7257	1.0013	0.0018754	6.43393	4.04221e-05	0.994927	0.998284	Rv1022	lpqU	lipoprotein
MT1051	167.941	253.445	181.731	273.708	1.08097	0.112327	7.92382	0.0871186	0.767873	0.981048	Rv1023	eno	enolase
MT1052	45.9501	54.7502	51.3446	65.6788	1.16261	0.217373	5.96438	0.488358	0.484661	0.909913	Rv1024	Rv1024	hypothetical protein
MT1053	33.6348	31.5333	31.0397	41.1724	1.10851	0.148616	5.25737	0.253617	0.61454	0.956297	Rv1025	Rv1025	hypothetical protein
MT1054	8.07467	6.44528	11.1905	10.6772	1.50232	0.587192	3.4931	3.83641	0.0501507	0.415148
MT1054.1	35.9584	44.7704	54.5346	38.2962	1.1498	0.201381	5.8945	0.244736	0.620807	0.958306
MT1056	30.3236	24.0485	27.5964	15.7992	0.796843	-0.327633	4.66207	0.907437	0.340795	0.868385	Rv1027c	kdpE	two-component response regulator
MT1057	186.821	98.6196	103.499	52.2042	0.545287	-0.874912	6.77951	4.02	0.0449637	0.390861	Rv1028c	kdpD	sensor histidine kinase
MT1057.1	1.51037	2.56425	2.1267	2.20637	1.07576	0.105363	1.23122	0.0881518	0.76654	0.981048
MT1058	36.6555	46.503	37.3185	37.3507	0.898265	-0.154787	5.51836	0.269776	0.603482	0.950609	Rv1029	kdpA	potassium-transporting ATPase A chain
MT1059	39.6182	37.0084	33.2676	32.6227	0.859765	-0.217985	5.37075	0.589326	0.44268	0.905045	Rv1030	kdpB	potassium-transporting ATPase B chain
MT1060	16.8464	16.2171	13.8742	15.5234	0.889491	-0.168948	4.1026	0.331958	0.564508	0.94124	Rv1031	kdpC	potassium-transporting ATPase C chain
MT1061	55.5932	43.7308	72.6622	76.1197	1.49747	0.582531	5.82925	3.80771	0.0510173	0.420183	Rv1032c	Rv1032c	sensor histidine kinase
MT1062	54.4314	45.8793	59.3957	71.2736	1.30256	0.381351	5.68846	1.57668	0.209239	0.775612	Rv1033c	Rv1033c	two-component response regulator
MT1063	4.18256	2.84147	2.93687	2.00937	0.698264	-0.518155	2.03278	1.62725	0.202083	0.772521	Rv1034c	Rv1034c	hypothetical protein
MT1065	18.3568	16.3558	15.5958	14.2626	0.859476	-0.21847	4.66753	0.553642	0.456833	0.907454	Rv1035c	Rv1035c	hypothetical protein
MT1066	308.58	701.911	510.863	1214.61	1.70763	0.771999	9.0129	2.11094	0.146249	0.703901	Rv1037c	Rv1037c	conserved hypothetical protein
MT1067	279.476	451.1	264.875	669.396	1.27891	0.35492	8.40453	0.563052	0.453033	0.907454	Rv1038c	Rv1038c	conserved hypothetical protein
MT1068	11.6182	10.8807	17.2161	8.31328	1.13155	0.178294	3.76	0.239999	0.624207	0.958352	Rv1039c	PPE	PPE-family protein
MT1069	51.4107	25.1574	137.121	24.3488	2.10756	1.07557	5.73303	2.90654	0.0882207	0.554332	Rv1040c	PE	PE-family protein
MT1070	2.55601	3.18799	2.88623	2.48216	0.935365	-0.0963981	1.65963	0.0707654	0.790226	0.983793
MT1070.1	37.9916	34.5827	35.2931	31.2437	0.916493	-0.125805	5.03454	0.156431	0.692464	0.96772
MT1073	139.593	77.8977	110.487	56.223	0.766235	-0.384141	6.69919	0.741031	0.389331	0.887167	Rv1043c	Rv1043c	hypothetical protein
MT1074	13.9419	15.2469	19.5454	12.1744	1.08517	0.117917	3.99588	0.138734	0.709543	0.969441	Rv1044	Rv1044	conserved hypothetical protein
MT1075	23.0622	27.9295	35.0399	27.6584	1.22951	0.29808	4.77892	0.929192	0.335073	0.862479	Rv1045	Rv1045	hypothetical protein
MT1075.1	570.571	647.715	570.259	454.945	0.841507	-0.248953	9.42003	0.420017	0.516928	0.922431	Rv1046c	Rv1046c	hypothetical protein
MT1077	13.5933	15.1776	8.70934	12.529	0.739956	-0.43449	3.93012	1.74259	0.186811	0.762921
MT1078	63.2032	58.7698	104.461	82.0296	1.52854	0.612158	6.21577	3.92468	0.0475823	0.400369	Rv1048c	Rv1048c	hypothetical protein
MT1079	43.8007	44.216	41.0149	47.0035	1.00024	0.000349485	5.45102	1.40177e-06	0.999055	0.999677	Rv1049	Rv1049	transcriptional regulator (MarR family)
MT1080	8.71367	6.72249	8.91188	8.43148	1.1208	0.164523	3.13443	0.283808	0.594216	0.948579	Rv1050	Rv1050	probable oxidoreductaseoxidoreducatse
MT1082	7.43566	6.02945	6.98772	10.5984	1.30661	0.385829	3.37157	0.915867	0.338562	0.866494
MT1083	23.5269	27.5137	33.8246	26.5158	1.18202	0.241255	4.96905	0.570454	0.450079	0.90677	Rv1052	Rv1052	hypothetical protein
MT1083.1	242.414	300.225	195.808	287.301	0.890378	-0.16751	8.08866	0.1855	0.666689	0.96772
MT1083.2	99.2197	110.817	152.11	144.675	1.41305	0.498812	7.14839	2.64985	0.103559	0.61432
MT1084	24.4564	29.177	35.3943	35.6565	1.32531	0.406326	5.23743	2.00852	0.156417	0.721076	Rv1054	Rv1054	integrase-a
MT1085	87.4852	94.8079	97.0686	103.778	1.10189	0.139975	6.68227	0.225088	0.63519	0.960801	Rv1056	Rv1056	conserved hypothetical protein
MT1087	100.498	152.33	393.794	521.294	3.61991	1.85595	8.16282	25.1073	5.4226e-07	2.70881e-05	Rv1057	Rv1057	conserved hypothetical protein
MT1088	132.506	141.172	144.97	141.72	1.04756	0.0670349	6.9094	0.049696	0.823593	0.983793
MT1089	116.124	114.767	138.033	131.358	1.1667	0.22243	7.19542	0.521699	0.470118	0.909913	Rv1059	Rv1059	conserved hypothetical protein
MT1090	60.8214	74.987	57.3702	67.4518	0.919456	-0.121148	6.22194	0.166343	0.683383	0.96772	Rv1060	Rv1060	hypothetical protein
MT1091	38.863	50.6612	35.5969	51.9284	0.978561	-0.0312657	5.5276	0.0105174	0.918317	0.990293
MT1092	9.23649	8.03927	9.41824	8.31328	1.02431	0.0346579	3.18231	0.0137058	0.906803	0.988973	Rv1062	Rv1062	conserved hypothetical protein
MT1093	234.34	106.52	187.909	52.7952	0.705979	-0.502303	6.96926	0.88359	0.34722	0.869542	Rv1063c	Rv1063c	conserved hypothetical protein
MT1094	7.95849	10.257	8.81061	10.9136	1.08532	0.118125	3.86377	0.114453	0.735131	0.973668	Rv1064c	lpqV	lipoprotein
MT1095	217.667	180.745	173.478	181.553	0.89109	-0.166357	7.39128	0.206439	0.649573	0.96772	Rv1065	Rv1065	conserved hypothetical protein
MT1096	10.4564	7.06901	10.7854	8.78607	1.11312	0.154605	3.6668	0.203015	0.652298	0.96772
MT1096.1	5.11202	6.58388	4.70912	4.17634	0.760534	-0.394915	2.434	1.29386	0.255339	0.804105	Rv1067c	PE_PGRS	PE_PGRS-family protein
MT1097	8.07467	11.9203	6.48137	7.40709	0.697204	-0.520347	2.86647	2.78493	0.0951549	0.579646	Rv1068c	PE_PGRS	PE_PGRS-family protein
MT1099	311.368	279.157	356.678	327.212	1.15806	0.211715	8.09215	0.401866	0.526127	0.930105	Rv1069c	Rv1069c	conserved hypothetical protein
MT1100	233.294	262.246	254.748	287.301	1.09391	0.129489	7.83748	0.157136	0.691807	0.96772
MT1101	136.514	154.756	183.251	177.376	1.23816	0.308198	7.19216	1.01143	0.314559	0.852065	Rv1071c	echA9	enoyl-CoA hydratase/isomerase superfamily
MT1102	2680.62	5065.99	3309.9	5799.28	1.1759	0.233767	11.7522	0.216217	0.641937	0.963143	Rv1072	Rv1072	probable transmembrane protein
MT1103	168.464	553.115	334.195	683.068	1.40989	0.495583	8.6755	0.861615	0.353287	0.869542	Rv1073	Rv1073	conserved hypothetical protein
MT1104	1186.34	1182.88	1063.5	1100.82	0.913519	-0.130494	10.0109	0.121346	0.72758	0.973668	Rv1074c	fadA3	acetyl-CoA C-acetyltransferase
MT1105	277.734	130.084	212.417	87.5061	0.735268	-0.443658	7.31219	0.872147	0.350362	0.869542	Rv1075c	Rv1075c	conserved hypothetical protein
MT1106	219.41	280.681	182.744	191.284	0.747976	-0.418936	7.39958	1.6341	0.201137	0.772521	Rv1076	lipU	probable esterase
MT1108	384.621	315.333	358.096	291.95	0.928638	-0.106813	8.16769	0.105748	0.745037	0.973668	Rv1077	cysM2	cystathionine [beta]-synthase
MT1109	311.078	338.689	253.735	335.683	0.907179	-0.140541	8.35261	0.166921	0.682862	0.96772	Rv1078	pra	MLPRAG (64.8% id) proline rich Ag
MT1110	209.012	218.238	175.048	272.092	1.04666	0.0657872	7.87329	0.0344467	0.85276	0.983793	Rv1079	metB	cystathionine [gamma]-synthase
MT1111	289.817	513.681	400.427	539.063	1.16934	0.225689	8.88078	0.326752	0.567578	0.943349	Rv1080c	greA	transcription elongation factor G
MT1112	22.7717	19.4051	28.8117	20.3301	1.16352	0.218498	4.97311	0.506236	0.476773	0.909913	Rv1081c	Rv1081c	hypothetical protein
MT1113	368.472	333.907	300.016	256.727	0.792624	-0.335292	8.12614	0.965202	0.32588	0.855997	Rv1082	Rv1082	similar to S. lincolnensis lmbE
MT1114	121.585	110.609	104.411	95.3466	0.860224	-0.217217	6.52502	0.478453	0.489124	0.913438	Rv1083	Rv1083	conserved hypothetical protein
MT1115	125.419	83.9965	88.9669	59.1779	0.707166	-0.499879	6.49389	1.78246	0.181848	0.754355	Rv1084	Rv1084	conserved hypothetical protein
MT1117	103.751	86.6993	84.9667	98.2228	0.961862	-0.0560976	6.68232	0.0316868	0.858717	0.985129	Rv1085c	Rv1085c	possible hemolysin
MT1118	294.057	116.569	210.543	103.699	0.765125	-0.386232	7.5601	0.612402	0.433885	0.905045	Rv1086	Rv1086	conserved hypothetical protein
MT1119	1.51037	1.6633	1.97479	1.18198	0.983093	-0.0246008	1.25587	0.00415423	0.948609	0.993521	Rv1088	PE	PE-family protein
MT1121	9.23649	17.2567	7.89917	8.90427	0.635791	-0.653376	3.48347	2.60046	0.106833	0.627781
MT1122	10.4564	14.0687	13.4185	15.681	1.18875	0.249451	3.69523	0.607877	0.435588	0.905045
MT1123	70.2322	45.1862	49.623	30.2588	0.69143	-0.532345	5.8559	2.51486	0.112778	0.638275	Rv1091	PE_PGRS	PE_PGRS-family protein
MT1124	161.9	115.876	142.843	88.5699	0.832879	-0.263822	6.74217	0.488724	0.484497	0.909913	Rv1092c	coaA	pantothenate kinase
MT1125	1347.13	1284.34	960.711	1045.62	0.762439	-0.391307	10.1909	0.942402	0.331661	0.859862	Rv1093	glyA	serine hydroxymethyltransferase
MT1126	10140.4	8631.61	5251.07	2105.94	0.391913	-1.3514	12.5721	5.65255	0.01743	0.221389	Rv1094	desA2	acyl-[ACP] desaturase
MT1127	1557.6	1109.97	1087.45	677.079	0.661461	-0.596272	10.1051	1.82089	0.177207	0.74499	Rv1095	phoH2	PhoH-like protein
MT1128	471.816	562.957	328.17	453.606	0.755544	-0.404413	9.04305	1.15953	0.281564	0.824845	Rv1096	Rv1096	carbohydrate degrading enzyme
MT1129	254.613	281.444	248.064	345.021	1.10646	0.145957	7.94346	0.184153	0.667829	0.96772	Rv1097c	Rv1097c	probable membrane spanning protein
MT1130	213.775	271.117	226.848	319.451	1.12675	0.172166	7.91807	0.232988	0.629317	0.958956	Rv1098c	fum	fumarase
MT1131	197.452	221.634	160.161	208.187	0.879015	-0.186041	7.61954	0.27873	0.597535	0.949488	Rv1099c	Rv1099c	conserved hypothetical protein
MT1132	336.812	155.588	228.671	110.397	0.688468	-0.538539	7.72257	1.44147	0.229901	0.792407	Rv1100	Rv1100	conserved hypothetical protein
MT1133	216.912	229.327	338.651	260.824	1.34334	0.425826	7.92028	1.63308	0.201277	0.772521	Rv1101c	Rv1101c	putative membrane protein
MT1134	260.713	190.309	280.167	215.318	1.09845	0.135471	7.80285	0.151696	0.69692	0.96772	Rv1102c	Rv1102c	conserved hypothetical protein
MT1135	349.07	239.653	314.346	194.633	0.864431	-0.210177	8.09473	0.337901	0.561043	0.938601
MT1137	81.2114	102.016	82.9412	149.048	1.26651	0.340857	6.71888	0.839028	0.359675	0.869906	Rv1106c	Rv1106c	probable cholesterol dehydrogenase
MT1138	81.2695	102.223	91.2961	101.926	1.05327	0.0748737	6.41174	0.0624944	0.802596	0.983793	Rv1107c	xseB	exonuclease VII small subunit
MT1139	80.2819	55.166	91.8025	59.5719	1.1169	0.159504	6.19003	0.23508	0.627783	0.958956	Rv1108c	xseA	exonuclease VII large subunit
MT1140	287.261	356.916	332.322	350.379	1.05985	0.083861	8.16381	0.0650393	0.798702	0.983793	Rv1109c	Rv1109c	hypothetical protein
MT1141	420.464	219.971	293.586	186.438	0.749425	-0.416145	8.23934	1.12028	0.289858	0.831386	Rv1110	lytB'	very similar to LytB
MT1142	258.215	289.344	263.154	305.346	1.03829	0.0542117	8.14737	0.0260586	0.871757	0.987206	Rv1111c	Rv1111c	hypothetical protein
MT1143	30.6721	41.2359	28.8623	37.6659	0.926053	-0.110834	5.32933	0.120571	0.728416	0.973668	Rv1112	Rv1112	conserved hypothetical protein
MT1143.1	5.57675	8.10857	6.98772	6.30391	0.973108	-0.0393277	2.89303	0.0136031	0.907151	0.988973	Rv1113	Rv1113	hypothetical protein
MT1144	12.2572	13.8608	10.4816	12.7654	0.891522	-0.165658	3.71836	0.279437	0.597071	0.949234	Rv1114	Rv1114	conserved hypothetical protein
MT1145	7.31948	10.5342	12.6589	22.1031	1.95302	0.965705	3.56199	7.5123	0.00612792	0.109643
[truncated: 2,863 more rows]

## Sheet: 3C, DosR DMSO vs HC104A
Supplementary Dataset 3C: Gene expression tables of DosR mutant treated with HC104A compared to DMSO
[truncated: 3,992 more rows]

[truncated: 1 more sheets: 3D, DosR DMSO vs HC106A]
